# Supplementary material for: Linking metabolic phenotypes to pathogenic traits among “Candidatus Liberibacter asiaticus” and its hosts
Source: PubMed Central journal article supplement (PMC7403731; doi:10.1038/s41540-020-00142-w), 2020-08-04

**Supplementary Table 1. Manually curated gene-protein-reactions associations**

| Reaction ID   | Reaction Name                                                         | GPR                                                                                                              | Subsystem                                  |
|---------------|-----------------------------------------------------------------------|------------------------------------------------------------------------------------------------------------------|--------------------------------------------|
| 2DHGLCNkt_tpp | 2DHGLCNkt tpp                                                         | (VBICanLib130745_0773)                                                                                           | Transport                                  |
| 4HTHRS        | 4-Hydroxy-L-threonine synthase                                        | (VBICanLib130745_0382)                                                                                           | Vitamin B6 Metabolism                      |
| ACCOAC        | Acetyl-CoA carboxylase                                                | (VBICanLib130745_0420) and<br>(VBICanLib130745_0160) and<br>(VBICanLib130745_0661) and<br>(VBICanLib130745_0161) | Fatty Acid Biosynthesis                    |
| ACGS          | N-acetylglutamate synthase                                            | (VBICanLib130745_0402) or<br>(VBICanLib130745_0225)                                                              | Urea cycle/amino group metabolism          |
| ACHBS         | 2-aceto-2-hydroxybutanoate synthase                                   | (VBICanLib130745_0020)                                                                                           | Valine, Leucine, and Isoleucine Metabolism |
| ACOATA        | Acetyl-CoA ACP transacylase                                           | (VBICanLib130745_0719 and<br>VBICanLib130745_0753)                                                               | Fatty Acid Biosynthesis                    |
| ACONT         | Aconitate hydratase                                                   | (VBICanLib130745_0366)                                                                                           | TCA Cycle                                  |
| ACONTa        | Aconitase (half-reaction A, Citrate hydro-lyase)                      | (VBICanLib130745_0366)                                                                                           | TCA Cycle                                  |
| ACONTb        | Aconitase (half-reaction B, Isocitrate hydro-lyase)                   | (VBICanLib130745_0366)                                                                                           | TCA Cycle                                  |
| ADSL1r        | Adenylosuccinate lyase                                                | (VBICanLib130745_0916)                                                                                           | Purine Metabolism                          |
| ADSL2r        | Adenylosuccinate lyase                                                | (VBICanLib130745_0916) or<br>(VBICanLib130745_0077) or<br>(VBICanLib130745_0280)                                 | Purine Metabolism                          |
| AGPAT120      | 1-tetradecanoyl-sn-glycerol 3-phosphate O-acyltransferase (n-C12:0)   | (VBICanLib130745_0669)                                                                                           | Glycerophospholipid Metabolism             |
| AGPAT160      | 1-hexadecanoyl-sn-glycerol 3-phosphate O-acyltransferase (n-C16:0)    | (VBICanLib130745_0669)                                                                                           | Glycerophospholipid Metabolism             |
| AGPAT161      | 1-hexadec-7-enoyl-sn-glycerol 3-phosphate O-acyltransferase (n-C16:1) | (VBICanLib130745_0669)                                                                                           | Glycerophospholipid Metabolism             |
| AGPAT180      | 1-octadecanoyl-sn-glycerol 3-phosphate O-acyltransferase (n-C18:0)    | (VBICanLib130745_0669)                                                                                           | Glycerophospholipid Metabolism             |
| AGPAT181      | 1-octadec-7-enoyl-sn-glycerol 3-phosphate O-acyltransferase (n-C18:1) | (VBICanLib130745_0669)                                                                                           | Glycerophospholipid Metabolism             |
| AKGDH         | 2-Oxoglutarate dehydrogenase                                          | (VBICanLib130745_1002 and<br>VBICanLib130745_1000 and<br>VBICanLib130745_1001)                                   | TCA Cycle                                  |
| ALAALAr       | D-alanine-D-alanine ligase (reversible)                               | (VBICanLib130745_1136)                                                                                           | Peptidoglycan Biosynthesis                 |

|          |                                                      |                                                                                                                                                                  |                                                |
|----------|------------------------------------------------------|------------------------------------------------------------------------------------------------------------------------------------------------------------------|------------------------------------------------|
| ANPRT    | Anthranilate phosphoribosyltransferase               | (VBICanLib130745_0325)                                                                                                                                           | Phenylalanine Tyrosine Tryptophan Biosynthesis |
| ANS      | Anthranilate synthase                                | (VBICanLib130745_0325)                                                                                                                                           | Phenylalanine Tyrosine Tryptophan Biosynthesis |
| ARGSS    | Argininosuccinate synthase                           | (VBICanLib130745_0126)                                                                                                                                           | Arginine and Proline Metabolism                |
|          |                                                      | ((VBICanLib130745_1064) and (VBICanLib130745_0058)) or ((VBICanLib130745_1063) and (VBICanLib130745_1064) and (VBICanLib130745_0058) and (VBICanLib130745_0057)) |                                                |
| ARGabcpp | L-arginine transport via ABC system (periplasm)      | (VBICanLib130745_0057))                                                                                                                                          | Transport                                      |
| ASAD     | Aspartate-semialdehyde dehydrogenase                 | (VBICanLib130745_0204)                                                                                                                                           | Lysine Biosynthesis                            |
| ASNS1    | Asparagine synthase (glutamine-hydrolysing)          | (VBICanLib130745_0238)                                                                                                                                           | Alanine and Aspartate Metabolism               |
|          |                                                      | (VBICanLib130745_0057 and VBICanLib130745_0056 and VBICanLib130745_1063) or (VBICanLib130745_1064)                                                               |                                                |
| ASPabcpp | L-aspartate transport via ABC system (periplasm)     | (VBICanLib130745_1064)                                                                                                                                           | Transport                                      |
| ATPPRT   | ATP phosphoribosyltransferase                        | (VBICanLib130745_0382)                                                                                                                                           | Histidine Metabolism                           |
|          |                                                      | (VBICanLib130745_0631 and VBICanLib130745_0634 and VBICanLib130745_1039 and VBICanLib130745_0632 and VBICanLib130745_0630 and VBICanLib130745_0633)              |                                                |
| ATPS4rpp | ATP synthase (four protons for one ATP) (periplasm)  |                                                                                                                                                                  | Oxidative Phosphorylation                      |
| BZt1pp   | Benzoate transport in via proton symport (periplasm) | (VBICanLib130745_0297)                                                                                                                                           | B-Ketoadipate pathway                          |
|          |                                                      | (VBICanLib130745_0244 and VBICanLib130745_0243) or (VBICanLib130745_0541) or (VBICanLib130745_0653) or (VBICanLib130745_0691)                                    |                                                |
| CHLabcpp | Choline transport via ABC system (periplasm)         | (VBICanLib130745_0691)                                                                                                                                           | Transport                                      |
| CHOLS_ex | CHOLS LPAREN ex RPAREN                               | (VBICanLib130745_0382)                                                                                                                                           | Transport                                      |
| DAPE     | Diaminopimelate epimerase                            | (VBICanLib130745_0534)                                                                                                                                           | Lysine Biosynthesis                            |

|            |                                                                       |                                                                                                                                                                        |                                                |
|------------|-----------------------------------------------------------------------|------------------------------------------------------------------------------------------------------------------------------------------------------------------------|------------------------------------------------|
| CHOLSabc   | CHOLSabc                                                              | (VBICanLib130745_0245) or<br>(VBICanLib130745_0244 and<br>VBICanLib130745_0243) or<br>(VBICanLib130745_0541) or<br>(VBICanLib130745_0653) or<br>(VBICanLib130745_0691) | Glycine, Serine and threonine metabolism       |
| CITtex     | Citrate transport via diffusion<br>(extracellular to periplasm)       | (VBICanLib130745_0840)                                                                                                                                                 | Transport                                      |
| COBALT2tex | Cobalt (Co+2) transport via diffusion<br>(extracellular to periplasm) | (VBICanLib130745_0652)                                                                                                                                                 | Transport                                      |
| COBALT2tpp | Cobalt transport in via permease (no H+)                              | (VBICanLib130745_0652)                                                                                                                                                 | Transport                                      |
| CS         | Citrate synthase                                                      | (VBICanLib130745_0243 and<br>VBICanLib130745_0244)                                                                                                                     | TCA Cycle                                      |
| CTPS2      | CTP synthase (glutamine)                                              | (VBICanLib130745_0243 and<br>VBICanLib130745_0244)                                                                                                                     | Pyrimidine Metabolism                          |
| CYO1b      | CYO1b                                                                 | (VBICanLib130745_0391 and<br>VBICanLib130745_0392)                                                                                                                     | Oxidative Phosphorylation                      |
| CYSabcpp   | L-cysteine uptake via ABC system<br>(periplasm)                       | (VBICanLib130745_0719 and<br>VBICanLib130745_0753)                                                                                                                     | Transport                                      |
| DAPDC      | Diaminopimelate decarboxylase                                         | (VBICanLib130745_0281)                                                                                                                                                 | Lysine Biosynthesis                            |
| DASYN120   | CDP-diacylglycerol synthetase (n-C12:0)                               | (VBICanLib130745_0467)                                                                                                                                                 | Glycerophospholipid Metabolism                 |
| DASYN160   | CDP-diacylglycerol synthetase (n-C16:0)                               | (VBICanLib130745_0467)                                                                                                                                                 | Glycerophospholipid Metabolism                 |
| DASYN161   | CDP-diacylglycerol synthetase (n-C16:1)                               | (VBICanLib130745_0467)                                                                                                                                                 | Glycerophospholipid Metabolism                 |
| DASYN180   | CDP-diacylglycerol synthetase (n-C18:0)                               | (VBICanLib130745_0467)                                                                                                                                                 | Glycerophospholipid Metabolism                 |
| DASYN181   | CDP-diacylglycerol synthetase (n-C18:1)                               | (VBICanLib130745_0467)                                                                                                                                                 | Glycerophospholipid Metabolism                 |
| DB4PS      | 3,4-Dihydroxy-2-butanone-4-phosphate<br>synthase                      | (VBICanLib130745_0266)                                                                                                                                                 | Riboflavin Metabolism                          |
| DDPA       | 3-deoxy-D-arabino-heptulosonate 7-<br>phosphate synthetase            | (VBICanLib130745_0575)                                                                                                                                                 | Phenylalanine Tyrosine Tryptophan Biosynthesis |
| DHPM1      | Dihydropyrimidinase (5,6-dihydrouracil)                               | (VBICanLib130745_0198)                                                                                                                                                 | Pantothenate and CoA Biosynthesis              |

|          |                                                             |                                                                                                            |                                   |
|----------|-------------------------------------------------------------|------------------------------------------------------------------------------------------------------------|-----------------------------------|
| DMATT    | Dimethylallyltranstransferase                               | (VBICanLib130745_1062) or<br>(VBICanLib130745_0490)                                                        | Steroid biosynthesis              |
| DNAMTn2r | DNA (cytosine-5-)-methyltransferase                         | (VBICanLib130745_0736) or<br>(VBICanLib130745_0735)                                                        | Methionine Metabolism             |
| DNTPPA   | Dihydroneopterin triphosphate<br>pyrophosphatase            | (VBICanLib130745_0224)                                                                                     | Folate Biosynthesis               |
| DPCOAK   | Dephospho-CoA kinase                                        | (VBICanLib130745_0422)                                                                                     | Pantothenate and CoA Biosynthesis |
| DPR      | 2-dehydropantoate 2-reductase                               | (VBICanLib130745_1050)                                                                                     | Pantothenate and CoA Biosynthesis |
| DTMPK    | DTMP kinase                                                 | (VBICanLib130745_0110)                                                                                     | Pyrimidine Metabolism             |
| DURAD    | Dihydrouracil dehydrogenase (NADP)                          | (VBICanLib130745_0347)                                                                                     | Pantothenate and CoA Biosynthesis |
| DUTPDP   | DUTP diphosphatase                                          | (VBICanLib130745_0975)                                                                                     | Pyrimidine Metabolism             |
| DXPS     | 1-deoxy-D-xylulose 5-phosphate synthase                     | (VBICanLib130745_0571)                                                                                     | Steroid biosynthesis              |
| EAR100y  | Enoyl-[acyl-carrier-protein] reductase<br>(NADPH) (n-C10:0) | (VBICanLib130745_0379) or<br>(VBICanLib130745_1123)                                                        | Fatty Acid Biosynthesis           |
| EAR120y  | Enoyl-[acyl-carrier-protein] reductase<br>(NADPH) (n-C12:0) | (VBICanLib130745_1123) or<br>(VBICanLib130745_0379) or<br>(VBICanLib130745_0718)                           | Fatty Acid Biosynthesis           |
| EAR121y  | Enoyl-[acyl-carrier-protein] reductase<br>(NADPH) (n-C12:1) | (VBICanLib130745_0244 and<br>VBICanLib130745_0243)                                                         | Fatty Acid Biosynthesis           |
| EAR160y  | Enoyl-[acyl-carrier-protein] reductase<br>(NADPH) (n-C16:0) | (VBICanLib130745_0379) or<br>(VBICanLib130745_1123)                                                        | Fatty Acid Biosynthesis           |
| EAR161y  | Enoyl-[acyl-carrier-protein] reductase<br>(NADPH) (n-C16:1) | (VBICanLib130745_0541 and<br>VBICanLib130745_0244) or<br>(VBICanLib130745_0243)                            | Fatty Acid Biosynthesis           |
| EAR180y  | Enoyl-[acyl-carrier-protein] reductase<br>(NADPH) (n-C18:0) | (VBICanLib130745_0379) or<br>(VBICanLib130745_1123)                                                        | Fatty Acid Biosynthesis           |
| EAR181y  | Enoyl-[acyl-carrier-protein] reductase<br>(NADPH) (n-C18:1) | (VBICanLib130745_0379) or<br>(VBICanLib130745_1123)                                                        | Fatty Acid Biosynthesis           |
| EAR40y   | Enoyl-[acyl-carrier-protein] reductase<br>(NADPH) (n-C4:0)  | (VBICanLib130745_0379) or<br>(VBICanLib130745_1123)                                                        | Fatty Acid Biosynthesis           |
| EAR60y   | Enoyl-[acyl-carrier-protein] reductase<br>(NADPH) (n-C6:0)  | (VBICanLib130745_0392 and<br>VBICanLib130745_0391 and<br>VBICanLib130745_0389 and<br>VBICanLib130745_0390) | Fatty Acid Biosynthesis           |

|             |                                                                  |                                                                                                    |                                      |
|-------------|------------------------------------------------------------------|----------------------------------------------------------------------------------------------------|--------------------------------------|
| EAR80y      | Enoyl-[acyl-carrier-protein] reductase (NADPH) (n-C8:0)          | (VBICanLib130745_0243 and VBICanLib130745_0244)                                                    | Fatty Acid Biosynthesis              |
| ETHSO3abcpp | Ethanesulfonate transport via ABC system (periplasm)             | (VBICanLib130745_0653 and VBICanLib130745_0652 and VBICanLib130745_0787)                           | Transport                            |
| FDH         | Formate dehydrogenase                                            | (VBICanLib130745_0787 and VBICanLib130745_0786 and VBICanLib130745_0785)                           | Methane Metabolism                   |
| FE2abc      | Iron (II) transport via ABC system                               | (VBICanLib130745_0243) or (VBICanLib130745_0691 and VBICanLib130745_0690 and VBICanLib130745_0687) | Transport                            |
| FERtex      | FERtex                                                           | (VBICanLib130745_0501)                                                                             | Transport                            |
| FERtpp      | FERtpp                                                           | (VBICanLib130745_0501)                                                                             | Transport                            |
| FTHFD       | Formyltetrahydrofolate deformylase                               | (VBICanLib130745_0591)                                                                             | One Carbon pool by folate            |
| FUM         | Fumarase                                                         | (VBICanLib130745_0132 or VBICanLib130745_0299)                                                     | TCA Cycle                            |
| FUMtex      | Fumarate transport via diffusion (extracellular to periplasm)    | (VBICanLib130745_0077)                                                                             | Transport                            |
| G1SAT       | Glutamate-1-semialdehyde aminotransferase                        | (VBICanLib130745_0345)                                                                             | Porphyrin and Chlorophyll Metabolism |
| G3PAT120    | Glycerol-3-phosphate acyltransferase (C12:0)                     | (VBICanLib130745_0719)                                                                             | Glycerophospholipid Metabolism       |
| G3PAT160    | Glycerol-3-phosphate acyltransferase (C16:0)                     | (VBICanLib130745_0719)                                                                             | Glycerophospholipid Metabolism       |
| G3PAT161    | Glycerol-3-phosphate acyltransferase (C16:1)                     | (VBICanLib130745_0719)                                                                             | Glycerophospholipid Metabolism       |
| G3PAT180    | Glycerol-3-phosphate acyltransferase (C18:0)                     | (VBICanLib130745_0719)                                                                             | Glycerophospholipid Metabolism       |
| G3PAT181    | Glycerol-3-phosphate acyltransferase (C18:1)                     | (VBICanLib130745_0719)                                                                             | Glycerophospholipid Metabolism       |
| GART        | GAR transformylase-T                                             | (VBICanLib130745_0041)                                                                             | Purine Metabolism                    |
| GLCNt2rpp   | D-gluconate transport via proton symport, reversible (periplasm) | (VBICanLib130745_0254)                                                                             | Transport                            |

|             |                                                                     |                                                                                                                                                          |                                          |
|-------------|---------------------------------------------------------------------|----------------------------------------------------------------------------------------------------------------------------------------------------------|------------------------------------------|
| GLCabcpp    | D-glucose transport via ABC system (periplasm)                      | (VBICanLib130745_0058) or (VBICanLib130745_0243) or (VBICanLib130745_0691)                                                                               | Transport                                |
| GLNS        | Glutamine synthetase                                                | ((VBICanLib130745_1063) and (VBICanLib130745_1064) and (VBICanLib130745_0058)) or (VBICanLib130745_0653)                                                 | Glutamate Metabolism                     |
| GLNTRAT     | Glutamyl-tRNA(Gln) amidotransferase                                 | (VBICanLib130745_0920 and VBICanLib130745_0922 and VBICanLib130745_0921)                                                                                 | Glutamate Metabolism                     |
| GLUSy       | Glutamate synthase (NADPH)                                          | (VBICanLib130745_0178)                                                                                                                                   | Glutamate Metabolism                     |
| GLUt4pp     | Na <sup>+</sup> /glutamate symport (periplasm)                      | (VBICanLib130745_0907)                                                                                                                                   | Transport                                |
| GLXCL       | Glyoxalate carboligase                                              | (VBICanLib130745_0192)                                                                                                                                   | Glycolate metabolism                     |
| GLYALDtex   | Glyceraldehyde transport via diffusion (extracellular to periplasm) | (VBICanLib130745_0410) or (VBICanLib130745_0057)                                                                                                         | Transport                                |
| GLYBabcpp   | Glycine betaine transport via ABC system (periplasm)                | (VBICanLib130745_0297)                                                                                                                                   | Arginine and Proline Metabolism          |
| GLYCK       | Glycerate kinase                                                    | (VBICanLib130745_0850)                                                                                                                                   | Glycine, Serine and threonine metabolism |
| GLYCL       | Glycine Cleavage System                                             | (VBICanLib130745_0569) or (VBICanLib130745_1002) or (VBICanLib130745_1004) or (VBICanLib130745_0569) or (VBICanLib130745_1002) or (VBICanLib130745_1004) | Glycine, Serine and threonine metabolism |
| GLYCLTt2rpp | Glycolate transport via proton symport, reversible (periplasm)      | (VBICanLib130745_0569) or (VBICanLib130745_1002) or (VBICanLib130745_1004) or (VBICanLib130745_0569) or (VBICanLib130745_1002) or (VBICanLib130745_1004) | Transport                                |
| GLYCLTtex   | Glycolate transport via diffusion (extracellular to periplasm)      | (VBICanLib130745_0569) or (VBICanLib130745_1002) or (VBICanLib130745_1004)                                                                               | Transport                                |

|                      |                                                                          |                                                                                                                                                                         |                                                |
|----------------------|--------------------------------------------------------------------------|-------------------------------------------------------------------------------------------------------------------------------------------------------------------------|------------------------------------------------|
|                      |                                                                          | (VBICanLib130745_0569) or<br>(VBICanLib130745_1002) or<br>(VBICanLib130745_1004) or<br>(VBICanLib130745_0569) or<br>(VBICanLib130745_1002) or<br>(VBICanLib130745_1004) | Nitrogen Metabolism                            |
| GLYCL_2              | Glycine cleavage system, cytosol                                         |                                                                                                                                                                         |                                                |
| GLYCTO1              | Glycolate oxidase                                                        | (VBICanLib130745_0484)                                                                                                                                                  | Glycolate metabolism                           |
|                      |                                                                          | (VBICanLib130745_1045 and<br>VBICanLib130745_0488)                                                                                                                      |                                                |
| GLYTRS               | Glycyl-tRNA synthetase                                                   |                                                                                                                                                                         | Glycine, Serine and threonine metabolism       |
|                      |                                                                          | (VBICanLib130745_1045 and<br>VBICanLib130745_0488)                                                                                                                      |                                                |
| GMPS2                | GMP synthase                                                             |                                                                                                                                                                         | Purine Metabolism                              |
|                      |                                                                          | (VBICanLib130745_0528) or<br>(VBICanLib130745_0299)                                                                                                                     |                                                |
| GND                  | Phosphogluconate dehydrogenase                                           |                                                                                                                                                                         | Pentose Phosphate Pathway                      |
|                      |                                                                          | (VBICanLib130745_1062) or<br>(VBICanLib130745_0490)                                                                                                                     |                                                |
| GRTT                 | Geranyltranstransferase                                                  |                                                                                                                                                                         | Steroid biosynthesis                           |
| GTHS                 | Glutathione synthetase                                                   | (VBICanLib130745_0549)                                                                                                                                                  | Glutamate Metabolism                           |
| GTPCII               | GTP cyclohydrolase II                                                    | (VBICanLib130745_0266)                                                                                                                                                  | Riboflavin Metabolism                          |
|                      | Bicarbonate transport (Na/HCO <sub>3</sub><br>cotransport)               | (VBICanLib130745_0858)                                                                                                                                                  | Transport                                      |
| HCO3_NAt             |                                                                          |                                                                                                                                                                         |                                                |
| HEMEOS               | Heme O synthase                                                          | (VBICanLib130745_0267)                                                                                                                                                  | Porphyrin and Chlorophyll Metabolism           |
| HMBS                 | Hydroxymethylbilane synthase                                             | (VBICanLib130745_0986)                                                                                                                                                  | Porphyrin and Chlorophyll Metabolism           |
| HMGL                 | Hydroxymethylglutaryl-CoA lyase                                          | (VBICanLib130745_0081)                                                                                                                                                  | Synthesis and degradation of Ketones Bodies    |
|                      | 2-amino-4-hydroxy-6-<br>hydroxymethyldihydropteridine<br>diphosphokinase | (VBICanLib130745_1106)                                                                                                                                                  | Folate Biosynthesis                            |
|                      | Hexanoate transport via diffusion<br>(extracellular to periplasm)        | (VBICanLib130745_0858)                                                                                                                                                  | Transport                                      |
| HXA <sub>tex</sub>   |                                                                          |                                                                                                                                                                         |                                                |
| ICDH <sub>yr</sub>   | Isocitrate dehydrogenase (NADP)                                          | (VBICanLib130745_0834)                                                                                                                                                  | TCA Cycle                                      |
|                      | Citrate transport via diffusion<br>extracellular to periplasm            | (VBICanLib130745_0909)                                                                                                                                                  | Transport                                      |
| ICIT <sub>tex</sub>  |                                                                          |                                                                                                                                                                         |                                                |
| ICL                  | Isocitrate lyase                                                         | (VBICanLib130745_0396)                                                                                                                                                  | TCA Cycle                                      |
| IGPS                 | Indole-3-glycerol-phosphate synthase                                     | (VBICanLib130745_0020)                                                                                                                                                  | Phenylalanine Tyrosine Tryptophan Biosynthesis |
|                      | L-isoleucine transport via ABC system<br>(periplasm)                     | (VBICanLib130745_0909)                                                                                                                                                  | Transport                                      |
| ILE <sub>abcpp</sub> |                                                                          |                                                                                                                                                                         |                                                |
|                      | 1-hydroxy-2-methyl-2-(E)-butenyl 4-<br>diphosphate reductase (ipdp)      | (VBICanLib130745_0979)                                                                                                                                                  | Steroid biosynthesis                           |
| IPDPS                |                                                                          |                                                                                                                                                                         |                                                |

|           |                                                                           |                                                     |                                            |
|-----------|---------------------------------------------------------------------------|-----------------------------------------------------|--------------------------------------------|
| IPMD      | 3-isopropylmalate dehydrogenase                                           | (VBICanLib130745_0834)                              | Valine, Leucine, and Isoleucine Metabolism |
| IPPM1a    | 3-isopropylmalate dehydratase                                             | (VBICanLib130745_0366) or<br>(VBICanLib130745_0750) | Valine, Leucine, and Isoleucine Metabolism |
| IPPM1b    | 2-isopropylmalate hydratase                                               | (VBICanLib130745_0366) or<br>(VBICanLib130745_0750) | Valine, Leucine, and Isoleucine Metabolism |
| ISETACTex | Isethionate transport via diffusion<br>(extracellular to periplasm)       | (VBICanLib130745_0653)                              | Transport                                  |
| KARA1     | Ketol-acid reductoisomerase (2,3-<br>dihydroxy-3-methylbutanoate)         | (VBICanLib130745_1170)                              | Valine, Leucine, and Isoleucine Metabolism |
| KARA2     | Ketol-acid reductoisomerase (2-<br>Acetolactate)                          | (VBICanLib130745_1170)                              | Valine, Leucine, and Isoleucine Metabolism |
| KAS14     | Beta-ketoacyl-ACP synthase                                                | (VBICanLib130745_0378)                              | Fatty Acid Biosynthesis                    |
| LEUTRS    | Leucyl-tRNA synthetase                                                    | (VBICanLib130745_0439)                              | Valine, Leucine, and Isoleucine Metabolism |
| LEUabcpp  | L-leucine transport via ABC system<br>(periplasm)                         | (VBICanLib130745_0909 and<br>VBICanLib130745_1112)  | Transport                                  |
| LYSTRS    | Lysyl-tRNA synthetase                                                     | (VBICanLib130745_1069)                              | Lysine Biosynthesis                        |
| LYSabcpp  | L-lysine transport via ABC system<br>(periplasm)                          | (VBICanLib130745_0889)                              | Lysine Metabolism                          |
| MACPD     | Malonyl-ACP decarboxylase                                                 | (VBICanLib130745_0378)                              | Fatty Acid Biosynthesis                    |
| MSO3abcpp | Methanesulfonate transport via ABC<br>system (periplasm)                  | (VBICanLib130745_0652)                              | Transport                                  |
| MTHFC     | Methenyltetrahydrofolate cyclohydrolase                                   | (VBICanLib130745_0745)                              | One Carbon pool by folate                  |
| MTHFD     | Methylenetetrahydrofolate dehydrogenase<br>(NADP)                         | (VBICanLib130745_0745)                              | One Carbon pool by folate                  |
| MHPGLUT   | 5 methyltetrahydropteroyltriglutamate<br>homocysteine S methyltransferase | (VBICanLib130745_1034)                              | Methionine Metabolism                      |



|          |                                                                     |                                                                                                                                                                                                                                                                                                                                                                                                    |                                            |
|----------|---------------------------------------------------------------------|----------------------------------------------------------------------------------------------------------------------------------------------------------------------------------------------------------------------------------------------------------------------------------------------------------------------------------------------------------------------------------------------------|--------------------------------------------|
|          |                                                                     | (VBICanLib130745_0781 and<br>VBICanLib130745_0782 and<br>VBICanLib130745_0783 and<br>VBICanLib130745_0784 and<br>VBICanLib130745_0785 and<br>VBICanLib130745_0786 and<br>VBICanLib130745_0787 and<br>VBICanLib130745_0788 and<br>VBICanLib130745_0789 and<br>VBICanLib130745_0790 and<br>VBICanLib130745_0791 and<br>VBICanLib130745_0792 and<br>VBICanLib130745_0793 and<br>VBICanLib130745_0794) |                                            |
| NADH16pp | NADH dehydrogenase (ubiquinone-8 & 3 protons) (periplasm)           |                                                                                                                                                                                                                                                                                                                                                                                                    | Oxidative Phosphorylation                  |
| NADK     | NAD kinase                                                          | (VBICanLib130745_0491)                                                                                                                                                                                                                                                                                                                                                                             | Nicotinate and Nicotinamide                |
| NDPK1    | Nucleoside-diphosphate kinase (ATP:GDP)                             | (VBICanLib130745_0299)                                                                                                                                                                                                                                                                                                                                                                             | Purine Metabolism                          |
| NDPK2    | Nucleoside-diphosphate kinase (ATP:UDP)                             | (VBICanLib130745_0299)                                                                                                                                                                                                                                                                                                                                                                             | Pyrimidine Metabolism                      |
| NDPK3    | Nucleoside-diphosphate kinase (ATP:CDP)                             | (VBICanLib130745_0299)                                                                                                                                                                                                                                                                                                                                                                             | Pyrimidine Metabolism                      |
| NDPK4    | Nucleoside-diphosphate kinase (ATP:dTDP)                            | (VBICanLib130745_0299)                                                                                                                                                                                                                                                                                                                                                                             | Pyrimidine Metabolism                      |
| NDPK5    | Nucleoside-diphosphate kinase (ATP:dGDP)                            | (VBICanLib130745_0299)                                                                                                                                                                                                                                                                                                                                                                             | Purine Metabolism                          |
| NDPK6    | Nucleoside-diphosphate kinase (ATP:dUDP)                            | (VBICanLib130745_0299)                                                                                                                                                                                                                                                                                                                                                                             | Pyrimidine Metabolism                      |
| NDPK7    | Nucleoside-diphosphate kinase (ATP:dCDP)                            | (VBICanLib130745_0299)                                                                                                                                                                                                                                                                                                                                                                             | Pyrimidine Metabolism                      |
| NDPK8    | Nucleoside-diphosphate kinase (ATP:dADP)                            | (VBICanLib130745_0299)                                                                                                                                                                                                                                                                                                                                                                             | Purine Metabolism                          |
| NNATr    | Nicotinate-nucleotide adenylyltransferase                           | (VBICanLib130745_0598)                                                                                                                                                                                                                                                                                                                                                                             | Nicotinate and Nicotinamide                |
| NO2t2rpp | Nitrite transport in via proton symport, reversible (periplasm)     | (VBICanLib130745_0965)                                                                                                                                                                                                                                                                                                                                                                             | Transport                                  |
| OIVD1r   | 2-oxoisovalerate dehydrogenase (acylating; 4-methyl-2-oxopentaoate) | (VBICanLib130745_1000)                                                                                                                                                                                                                                                                                                                                                                             | Valine, leucine and isoleucine degradation |

|          |                                                                         |                                                                                    |                                                |
|----------|-------------------------------------------------------------------------|------------------------------------------------------------------------------------|------------------------------------------------|
| OIVD2    | 2-oxoisovalerate dehydrogenase<br>(acylating; 3-methyl-2-oxobutanoate)  | (VBICanLib130745_1000)                                                             | Valine, leucine and isoleucine degradation     |
| OIVD3    | 2-oxoisovalerate dehydrogenase<br>(acylating; 3-methyl-2-oxopentanoate) | (VBICanLib130745_1000)                                                             | Valine, leucine and isoleucine degradation     |
| ORNCD    | Ornithine cyclodeaminase                                                | (VBICanLib130745_0989)                                                             | Arginine and Proline Metabolism                |
| ORNabcpp | Ornithine transport via ABC system<br>(periplasm)                       | (VBICanLib130745_0058)                                                             | Lysine Metabolism                              |
| ORPT     | Orotate phosphoribosyltransferase                                       | (VBICanLib130745_0961)                                                             | Pyrimidine Metabolism                          |
| PANTS    | Pantothenate synthase                                                   | (VBICanLib130745_0626)                                                             | Pantothenate and CoA Biosynthesis              |
| PDH      | Pyruvate dehydrogenase                                                  | (VBICanLib130745_0569)                                                             | Glycolysis                                     |
| PDX5POi  | Pyridoxine 5-phosphate oxidase                                          | (VBICanLib130745_1122)                                                             | Vitamin B6 Metabolism                          |
| PGM      | Phosphoglycerate mutase                                                 | (VBICanLib130745_0173)                                                             | Gluconeogenesis                                |
| PGMT     | Phosphoglucomutase                                                      | (VBICanLib130745_1058)                                                             | Glycolysis                                     |
| PMDPHT   | Pyrimidine phosphatase                                                  | (VBICanLib130745_0050)                                                             | Riboflavin Metabolism                          |
| PPA      | Inorganic diphosphatase                                                 | (VBICanLib130745_0124)                                                             | Oxidative Phosphorylation                      |
| PPBNGS   | Porphobilinogen synthase                                                | (VBICanLib130745_0257)                                                             | Porphyrin and Chlorophyll Metabolism           |
| PPPGO    | Protoporphyrinogen oxidase (aerobic)                                    | (VBICanLib130745_1023)                                                             | Porphyrin and Chlorophyll Metabolism           |
| PRAGSr   | Phosphoribosylglycinamide synthase                                      | (VBICanLib130745_0096)                                                             | Purine Metabolism                              |
| PRAIi    | Phosphoribosylanthranilate isomerase<br>(irreversible)                  | (VBICanLib130745_0020)                                                             | Phenylalanine Tyrosine Tryptophan Biosynthesis |
| PRFGS    | Phosphoribosylformylglycinamide<br>synthase                             | (VBICanLib130745_0912)                                                             | Purine Metabolism                              |
| PSP_L    | Phosphoserine phosphatase (L-serine)                                    | (VBICanLib130745_0900)                                                             | Glycine, Serine and threonine metabolism       |
| RIBabcpp | D-ribose transport via ABC system<br>(periplasm)                        | (VBICanLib130745_0691) or<br>(VBICanLib130745_0653)                                | Transport                                      |
| RPE      | Ribulose 5-phosphate 3-epimerase                                        | (VBICanLib130745_0917)                                                             | Pentose Phosphate Pathway                      |
| RPI      | Ribose-5-phosphate isomerase                                            | (VBICanLib130745_1003)                                                             | Pentose Phosphate Pathway                      |
| SDPTA    | Succinyldiaminopimelate transaminase                                    | (VBICanLib130745_0345)                                                             | Lysine Biosynthesis                            |
| SERAT    | Serine O-acetyltransferase                                              | (VBICanLib130745_0562)                                                             | Cysteine Metabolism                            |
| SERTRS   | Seryl-tRNA synthetase                                                   | (VBICanLib130745_0564)                                                             | Glycine, Serine and threonine metabolism       |
| SHCHF    | Sirohydrochlorin ferrochelataase                                        | (VBICanLib130745_0636)                                                             | Porphyrin and Chlorophyll Metabolism           |
| SOTA     | Succinylornithine transaminase                                          | (VBICanLib130745_0345)                                                             | Arginine and Proline Metabolism                |
| SUCD1    | Succinate dehydrogenase                                                 | (VBICanLib130745_0992) and<br>(VBICanLib130745_0993) and<br>(VBICanLib130745_0991) | TCA Cycle                                      |

|               |                                                                                                       |                                                                                                                                                     |                                             |
|---------------|-------------------------------------------------------------------------------------------------------|-----------------------------------------------------------------------------------------------------------------------------------------------------|---------------------------------------------|
| SULR          | Sulfite reductase (NADPH2)                                                                            | (VBICanLib130745_0902)                                                                                                                              | Sulfur Metabolism                           |
| SULabcpp      | Sulfate transport via ABC system (periplasm)                                                          | (VBICanLib130745_0822)                                                                                                                              | Sulfur Metabolism                           |
| TOLtpp        | TOLtpp                                                                                                | (VBICanLib130745_0058)                                                                                                                              | Transport                                   |
| TRSARr        | Tartronate semialdehyde reductase                                                                     | (VBICanLib130745_0528)                                                                                                                              | Glycolate metabolism                        |
| UPPN          | B-ureidopropionase                                                                                    | (VBICanLib130745_1048)                                                                                                                              | Pantothenate and CoA Biosynthesis           |
| UREA          | Urease                                                                                                | (VBICanLib130745_0814)                                                                                                                              | Urea cycle/amino group metabolism           |
| VANKpp        | VANKpp                                                                                                | (VBICanLib130745_0909)                                                                                                                              | Transport                                   |
| VANLNtex      | VANLNtex                                                                                              | (VBICanLib130745_0528)                                                                                                                              | Transport                                   |
| VANLTtex      | VANLTtex                                                                                              | (VBICanLib130745_0691) or (VBICanLib130745_0243)                                                                                                    | Transport                                   |
| pentso3abcpp  | Pentso3abcpp                                                                                          | (VBICanLib130745_0653)                                                                                                                              | Transport                                   |
| ACOLIPAabctex | Arabinose modified core oligosaccharide lipid A transport via ABC system (periplasm to extracellular) | (VBICanLib130745_0302 and VBICanLib130745_0501) or (VBICanLib130745_0715) or (VBICanLib130745_0019) or (VBICanLib130745_0541)                       | Lipopolysaccharide Biosynthesis / Recycling |
| ALATA_D2      | D-alanine transaminase                                                                                | (VBICanLib130745_0253)                                                                                                                              | Cofactor and Prosthetic Group Biosynthesis  |
| ALATA_L2      | Alanine transaminase                                                                                  | (VBICanLib130745_0253)                                                                                                                              | Cofactor and Prosthetic Group Biosynthesis  |
| AMPTASECG     | Alanyl aminopeptidase (cys-gly)                                                                       | (VBICanLib130745_0301)                                                                                                                              | Cysteine Metabolism                         |
| AMPTASEPG     | Aminopeptidase (pro-gly)                                                                              | (VBICanLib130745_0301)                                                                                                                              | Arginine and Proline Metabolism             |
| ASCBptsp      | L-ascorbate transport via PEP:Pyr PTS (periplasm)                                                     | (VBICanLib130745_0057 and VBICanLib130745_0056 and VBICanLib130745_1063 and VBICanLib130745_1063) or (VBICanLib130745_1125)                         | Transport, Inner Membrane                   |
| BUTSO3abcpp   | Butanesulfonate transport via ABC system (periplasm)                                                  | (VBICanLib130745_0653 and VBICanLib130745_0652 and VBICanLib130745_0244)                                                                            | Transport, Inner Membrane                   |
| CLIPAabctex   | Cold lipid A transport via ABC system (periplasm to extracellular)                                    | (VBICanLib130745_0517 and VBICanLib130745_0302 and VBICanLib130745_0501 and VBICanLib130745_0500 and VBICanLib130745_0304 and VBICanLib130745_0361) | Lipopolysaccharide Biosynthesis / Recycling |

|                  |                                                                                                                        |                                                                                                   |                                             |
|------------------|------------------------------------------------------------------------------------------------------------------------|---------------------------------------------------------------------------------------------------|---------------------------------------------|
| COLIPAPabctex    | Core oligosaccharide lipid A diphosphate transport via ABC system (periplasm to extracellular)                         | (VBICanLib130745_0302 and VBICanLib130745_0500 and VBICanLib130745_0501)                          | Lipopolysaccharide Biosynthesis / Recycling |
| COLIPAabctex     | Core oligosaccharide lipid A transport via ABC system (periplasm to extracellular)                                     | (VBICanLib130745_0302 and VBICanLib130745_0500 and VBICanLib130745_0501)                          | Lipopolysaccharide Biosynthesis / Recycling |
| CRNDabcpp        | D-carnitine transport via ABC system (periplasm)                                                                       | (VBICanLib130745_0243 and VBICanLib130745_0244)                                                   | Transport, Inner Membrane                   |
| CYSSADS          | L-cysteine sulfinic acid desulfurase                                                                                   | (VBICanLib130745_1043) or (VBICanLib130745_1012)                                                  | Cysteine Metabolism                         |
| ECA4COLIPAabctex | Enterobacterial common antigen (x4) core oligosaccharide lipid A transport via ABC system (periplasm to extracellular) | (VBICanLib130745_0500 and VBICanLib130745_0517 and VBICanLib130745_0501 and VBICanLib130745_0302) | Lipopolysaccharide Biosynthesis / Recycling |
| ENLIPAabctex     | Phosphoethanolamine lipid A transport via ABC system (periplasm to extracellular)                                      | (VBICanLib130745_0501 and VBICanLib130745_0302 and VBICanLib130745_0500)                          | Lipopolysaccharide Biosynthesis / Recycling |
| GRXR             | Glutaredoxin reductase                                                                                                 | (VBICanLib130745_0910)                                                                            | Unassigned                                  |
| K2L4Aabcpp       | KDO(2)-lipid IV A transport via ABC system (periplasm)                                                                 | (VBICanLib130745_0850)                                                                            | Transport, Inner Membrane                   |
| K2L4Aabctex      | KDO(2)-lipid IV A transport via ABC system (periplasm to extracellular)                                                | (VBICanLib130745_0850)                                                                            | Lipopolysaccharide Biosynthesis / Recycling |
| KAS15            | Beta-ketoacyl-ACP synthase (2)                                                                                         | (VBICanLib130745_0720)                                                                            | Membrane Lipid Metabolism                   |
| KDOPS            | 3-deoxy -D-manno-octulosonic -acid 8-phosphate synthase                                                                | (VBICanLib130745_0575)                                                                            | Lipopolysaccharide Biosynthesis / Recycling |
| LIPAabctex       | Lipid A transport via ABC system (periplasm to extracellular)                                                          | (VBICanLib130745_0850)                                                                            | Lipopolysaccharide Biosynthesis / Recycling |

|                       |                                                                                                           |                                                                                                                                                                                                                                                                                                                                                                                                    |                                             |
|-----------------------|-----------------------------------------------------------------------------------------------------------|----------------------------------------------------------------------------------------------------------------------------------------------------------------------------------------------------------------------------------------------------------------------------------------------------------------------------------------------------------------------------------------------------|---------------------------------------------|
| NADH17pp              | NADH dehydrogenase (menaquinone-8 & 3 protons) (periplasm)                                                | (VBICanLib130745_0781 and<br>VBICanLib130745_0782 and<br>VBICanLib130745_0783 and<br>VBICanLib130745_0784 and<br>VBICanLib130745_0785 and<br>VBICanLib130745_0786 and<br>VBICanLib130745_0787 and<br>VBICanLib130745_0788 and<br>VBICanLib130745_0789 and<br>VBICanLib130745_0790 and<br>VBICanLib130745_0791 and<br>VBICanLib130745_0792 and<br>VBICanLib130745_0793 and<br>VBICanLib130745_0794) | Oxidative Phosphorylation                   |
| NADH18pp              | NADH dehydrogenase<br>(demethylmenaquinone-8 & 3 protons)<br>(periplasm)                                  | (VBICanLib130745_0781 and<br>VBICanLib130745_0782 and<br>VBICanLib130745_0783 and<br>VBICanLib130745_0784 and<br>VBICanLib130745_0785 and<br>VBICanLib130745_0786 and<br>VBICanLib130745_0787 and<br>VBICanLib130745_0788 and<br>VBICanLib130745_0789 and<br>VBICanLib130745_0790 and<br>VBICanLib130745_0791 and<br>VBICanLib130745_0792 and<br>VBICanLib130745_0793 and<br>VBICanLib130745_0794) | Oxidative Phosphorylation                   |
| NADHHR                | NADH hydratase                                                                                            | (VBICanLib130745_0592)                                                                                                                                                                                                                                                                                                                                                                             | Metabolite Repair                           |
| NADHHS                | NADH hydratase                                                                                            | (VBICanLib130745_0592)                                                                                                                                                                                                                                                                                                                                                                             | Metabolite Repair                           |
| NADPHHR               | NADPH hydratase                                                                                           | (VBICanLib130745_0592)                                                                                                                                                                                                                                                                                                                                                                             | Metabolite Repair                           |
| NADPHHS               | NADPH hydratase                                                                                           | (VBICanLib130745_0592)                                                                                                                                                                                                                                                                                                                                                                             | Metabolite Repair                           |
| O16A4COLIPAab<br>ctex | O16 antigen (x4) core oligosaccharide<br>lipid A transport via ABC system<br>(periplasm to extracellular) | (VBICanLib130745_0499 and<br>VBICanLib130745_0500 and<br>VBICanLib130745_0501)                                                                                                                                                                                                                                                                                                                     | Lipopolysaccharide Biosynthesis / Recycling |
| OCTDPS                | Octaprenyl pyrophosphate synthase                                                                         | (VBICanLib130745_0490)                                                                                                                                                                                                                                                                                                                                                                             | Cofactor and Prosthetic Group Biosynthesis  |

|            |                                                                        |                                                                                                                                                                                   |                                            |
|------------|------------------------------------------------------------------------|-----------------------------------------------------------------------------------------------------------------------------------------------------------------------------------|--------------------------------------------|
| OMBZLM     | 2-Octaprenyl-6-methoxy-benzoquinol methylase                           | (VBICanLib130745_0490)                                                                                                                                                            | Cofactor and Prosthetic Group Biosynthesis |
| PA140abcpp | Phosphatidate transport via ABC system (n-C14:0, periplasm)            | (VBICanLib130745_0850)                                                                                                                                                            | Transport, Inner Membrane                  |
| PE141abcpp | Phosphatidylethanolamine transport via ABC system (n-C14:1, periplasm) | (VBICanLib130745_0850)                                                                                                                                                            | Transport, Inner Membrane                  |
| RNDR3b     | Ribonucleoside-diphosphate reductase (CDP) (glutaredoxin)              | (VBICanLib130745_0749 and VBICanLib130745_0016) or (VBICanLib130745_0074) or (VBICanLib130745_0075) or (VBICanLib130745_0775) or (VBICanLib130745_0906) or (VBICanLib130745_0956) | Nucleotide Salvage Pathway                 |
| RNDR4b     | Ribonucleoside-diphosphate reductase (UDP) (glutaredoxin)              | (VBICanLib130745_0477)                                                                                                                                                            | Nucleotide Salvage Pathway                 |
| S2FE2SR    | SUF [2Fe-2S] regeneration                                              | (VBICanLib130745_0945 and VBICanLib130745_1012 and VBICanLib130745_1011 and VBICanLib130745_1010)                                                                                 | Cofactor and Prosthetic Group Biosynthesis |
| S2FE2SS    | SUF [2Fe-2S] Synthesis                                                 | (VBICanLib130745_0945 and VBICanLib130745_1012 and VBICanLib130745_1011 and VBICanLib130745_1010)                                                                                 | Cofactor and Prosthetic Group Biosynthesis |
| S2FE2SS2   | SUF [2Fe-2S] Synthesis II                                              | (VBICanLib130745_0945 and VBICanLib130745_1012 and VBICanLib130745_1011 and VBICanLib130745_1010)                                                                                 | Cofactor and Prosthetic Group Biosynthesis |
| S2FE2ST    | SUF [2Fe-2S] Transfer                                                  | (VBICanLib130745_0945 and VBICanLib130745_1012 and VBICanLib130745_1011 and VBICanLib130745_1010)                                                                                 | Cofactor and Prosthetic Group Biosynthesis |
| S4FE4SR    | SUF [4Fe-4S] Reduction                                                 | (VBICanLib130745_0945 and VBICanLib130745_1012 and VBICanLib130745_1011 and VBICanLib130745_1010)                                                                                 | Cofactor and Prosthetic Group Biosynthesis |

|               |                                                                        |                                                                                                            |                                            |
|---------------|------------------------------------------------------------------------|------------------------------------------------------------------------------------------------------------|--------------------------------------------|
| S4FE4ST       | SUF [4Fe-4S] Transfer                                                  | (VBICanLib130745_0945 and<br>VBICanLib130745_1012 and<br>VBICanLib130745_1011 and<br>VBICanLib130745_1010) | Cofactor and Prosthetic Group Biosynthesis |
| SCYSDS        | SUF Cysteine desulfuration                                             | (VBICanLib130745_1012)                                                                                     | Cofactor and Prosthetic Group Biosynthesis |
| FEex          | Iron transporter                                                       | (VBICanLib130745_0850 and<br>VBICanLib130745_0673) or<br>(VBICanLib130745_0850)                            | iron metabolism                            |
| FEpp          | Iron transporter                                                       | (VBICanLib130745_0673 and<br>VBICanLib130745_0850)                                                         | iron metabolism                            |
| Kt3pp         | Potassium transport out via proton<br>antiport (periplasm)             | (VBICanLib130745_0857)                                                                                     | Inorganic Ion Transport and Metabolism     |
| 2DHGLCNkt_tpp | 2DHGLCNkt tpp                                                          | (RH08_03650)                                                                                               | Transport                                  |
| 3OAR141       | 3-oxoacyl-[acyl-carrier-protein] reductase<br>(n-C14:1)                | (RH08_03350) or (RH08_01075) or (RH08_01695)                                                               | Fatty Acid Biosynthesis                    |
| 3OAS120       | 3-oxoacyl-[acyl-carrier-protein] synthase<br>(n-C12:0)                 | (RH08_01690 and RH08_03360)                                                                                | Fatty Acid Biosynthesis                    |
| 4HTHRS        | 4-Hydroxy-L-threonine synthase                                         | (RH08_01710)                                                                                               | Vitamin B6 Metabolism                      |
| ACCOAC        | Acetyl-CoA carboxylase                                                 | (RH08_00715 and RH08_01930 and RH08_03100<br>and RH08_00720)                                               | Fatty Acid Biosynthesis                    |
| ACGS          | N-acetylglutamate synthase                                             | (RH08_01810) or (RH08_01020)                                                                               | Urea cycle/amino group metabolism          |
| ACHBS         | 2-aceto-2-hydroxybutanoate synthase                                    | (RH08_00090)                                                                                               | Valine, Leucine, and Isoleucine Metabolism |
| ACOATA        | Acetyl-CoA ACP transacylase                                            | (RH08_03530))                                                                                              | Fatty Acid Biosynthesis                    |
| ACONT         | Aconitate hydratase                                                    | (RH08_01630)                                                                                               | TCA Cycle                                  |
| ACONTa        | Aconitase (half-reaction A, Citrate hydro-<br>lyase)                   | ((RH08_01630)                                                                                              | TCA Cycle                                  |
| ACONTb        | Aconitase (half-reaction B, Isocitrate<br>hydro-lyase)                 | (RH08_01630))                                                                                              | TCA Cycle                                  |
| ADSL1r        | Adenylosuccinate lyase                                                 | (RH08_04320)                                                                                               | Purine Metabolism                          |
| ADSL2r        | Adenylosuccinate lyase                                                 | (RH08_04320) or (RH08_00340) or (RH08_01235)                                                               | Purine Metabolism                          |
| AGPAT120      | 1-tetradecanoyl-sn-glycerol 3-phosphate<br>O-acyltransferase (n-C12:0) | (RH08_03135)                                                                                               | Glycerophospholipid Metabolism             |
| AGPAT160      | 1-hexadecanoyl-sn-glycerol 3-phosphate<br>O-acyltransferase (n-C16:0)  | (RH08_03135)                                                                                               | Glycerophospholipid Metabolism             |

|           |                                                                       |                                                                                         |                                                |
|-----------|-----------------------------------------------------------------------|-----------------------------------------------------------------------------------------|------------------------------------------------|
| AGPAT161  | 1-hexadec-7-enoyl-sn-glycerol 3-phosphate O-acyltransferase (n-C16:1) | (RH08_03135)                                                                            | Glycerophospholipid Metabolism                 |
| AGPAT180  | 1-octadecanoyl-sn-glycerol 3-phosphate O-acyltransferase (n-C18:0)    | (RH08_03135)                                                                            | Glycerophospholipid Metabolism                 |
| AGPAT181  | 1-octadec-7-enoyl-sn-glycerol 3-phosphate O-acyltransferase (n-C18:1) | (RH08_03135)                                                                            | Glycerophospholipid Metabolism                 |
| AICART    | Phosphoribosylaminoimidazolecarboxamide formyltransferase             | (RH08_02700)                                                                            | Purine Metabolism                              |
| AKGDH     | 2-Oxoglutarate dehydrogenase                                          | (RH08_03355 and RH08_03345)                                                             | TCA Cycle                                      |
| ALAALAr   | D-alanine-D-alanine ligase (reversible)                               | (RH08_05265)                                                                            | Peptidoglycan Biosynthesis                     |
| ALATRS    | Alanyl-tRNA synthetase                                                | (RH08_04695 and RH08_04685 and RH08_04690)                                              | Alanine and Aspartate Metabolism               |
| ANPRT     | Anthranilate phosphoribosyltransferase                                | (RH08_01450)                                                                            | Phenylalanine Tyrosine Tryptophan Biosynthesis |
| ANS       | Anthranilate synthase                                                 | (RH08_01450)                                                                            | Phenylalanine Tyrosine Tryptophan Biosynthesis |
| ARGabcpp  | L-arginine transport via ABC system (periplasm)                       | (RH08_01320)                                                                            | Transport                                      |
| ASAD      | Aspartate-semialdehyde dehydrogenase                                  | (RH08_00915)                                                                            | Lysine Biosynthesis                            |
| ASNS1     | Asparagine synthase (glutamine-hydrolysing)                           | (RH08_01070)                                                                            | Alanine and Aspartate Metabolism               |
| ASPabcpp  | L-aspartate transport via ABC system (periplasm)                      | (RH08_00245 and RH08_00240 and RH08_04980) or (RH08_04985)                              | Transport                                      |
| ASPt2_2pp | Aspartate transport via proton symport (2 H) (periplasm)              | (RH08_01320) or (RH08_05225)                                                            | Transport                                      |
| ATPPRT    | ATP phosphoribosyltransferase                                         | (RH08_01710)                                                                            | Histidine Metabolism                           |
| ATPS4rpp  | ATP synthase (four protons for one ATP) (periplasm)                   | (RH08_02940 and RH08_02955 and RH08_04855 and RH08_02945 and RH08_02935 and RH08_02950) | Oxidative Phosphorylation                      |
| BZt1pp    | Benzoate transport in via proton symport (periplasm)                  | (RH08_01320)                                                                            | B-Ketoadipate pathway                          |
| CHLabcpp  | Choline transport via ABC system (periplasm)                          | (RH08_01095 and RH08_01090) or (RH08_02520) or (RH08_03060) or (RH08_03235)             | Transport                                      |
| CHOLS_ex  | CHOLS LPAREN ex RPAREN                                                | (RH08_01710)                                                                            | Transport                                      |
| DAPE      | Diaminopimelate epimerase                                             | (RH08_02485)                                                                            | Lysine Biosynthesis                            |



|            |                                                                                                 |                                                                                                  |                                                |
|------------|-------------------------------------------------------------------------------------------------|--------------------------------------------------------------------------------------------------|------------------------------------------------|
| CHOLSabc   | CHOLSabc                                                                                        | (RH08_01100 and RH08_01095 and RH08_01090)<br>or (RH08_02520) or (RH08_03060) or<br>(RH08_03235) | Glycine, Serine and threonine metabolism       |
| CITtex     | Citrate transport via diffusion<br>(extracellular to periplasm)                                 | (RH08_04000)                                                                                     | Transport                                      |
| COBALT2tex | Cobalt (Co+2) transport via diffusion<br>(extracellular to periplasm)                           | (RH08_03055)                                                                                     | Transport                                      |
| COBALT2tpp | Cobalt transport in via permease (no H+)<br>L-carnitine transport via ABC system<br>(periplasm) | (RH08_03055)                                                                                     | Transport                                      |
| CRNabcpp   |                                                                                                 | (RH08_01090 and RH08_03060 and RH08_01095)                                                       | Transport                                      |
| CS         | Citrate synthase                                                                                | ((RH08_01090) and (RH08_01095))                                                                  | TCA Cycle                                      |
| CTPS2      | CTP synthase (glutamine)                                                                        | ((RH08_01090) and (RH08_01095))                                                                  | Pyrimidine Metabolism                          |
| CYO1b      | CYO1b                                                                                           | (RH08_01755 and RH08_01760)                                                                      | Oxidative Phosphorylation                      |
| CYSabcpp   | L-cysteine uptake via ABC system<br>(periplasm)                                                 | (RH08_03530))                                                                                    | Transport                                      |
| DAPDC      | Diaminopimelate decarboxylase                                                                   | (RH08_01240)                                                                                     | Lysine Biosynthesis                            |
| DASYN120   | CDP-diacylglycerol synthetase (n-C12:0)                                                         | (RH08_02160)                                                                                     | Glycerophospholipid Metabolism                 |
| DASYN160   | CDP-diacylglycerol synthetase (n-C16:0)                                                         | (RH08_02160)                                                                                     | Glycerophospholipid Metabolism                 |
| DASYN161   | CDP-diacylglycerol synthetase (n-C16:1)                                                         | (RH08_02160)                                                                                     | Glycerophospholipid Metabolism                 |
| DASYN180   | CDP-diacylglycerol synthetase (n-C18:0)                                                         | (RH08_02160)                                                                                     | Glycerophospholipid Metabolism                 |
| DASYN181   | CDP-diacylglycerol synthetase (n-C18:1)                                                         | (RH08_02160)                                                                                     | Glycerophospholipid Metabolism                 |
| DB4PS      | 3,4-Dihydroxy-2-butanone-4-phosphate<br>synthase                                                | (RH08_01180)                                                                                     | Riboflavin Metabolism                          |
| DDPA       | 3-deoxy-D-arabino-heptulosonate 7-<br>phosphate synthetase                                      | (RH08_02685)                                                                                     | Phenylalanine Tyrosine Tryptophan Biosynthesis |
| DHDPS      | Dihydrodipicolinate synthase                                                                    | (RH08_01090 and RH08_01095)                                                                      | Lysine Biosynthesis                            |
| DHPM1      | Dihydropyrimidinase (5,6-dihydrouracil)                                                         | (RH08_00890)                                                                                     | Pantothenate and CoA Biosynthesis              |
| DMATT      | Dimethylallyltranstransferase                                                                   | (RH08_04975) or (RH08_02275)                                                                     | Steroid biosynthesis                           |
| DNAMTn2r   | DNA (cytosine-5-)-methyltransferase                                                             | (RH08_03445) or (RH08_03440)                                                                     | Methionine Metabolism                          |

|             |                                                          |                                                           |                                   |
|-------------|----------------------------------------------------------|-----------------------------------------------------------|-----------------------------------|
| DNTPPA      | Dihydroneopterin triphosphate pyrophosphatase            | (RH08_01015)                                              | Folate Biosynthesis               |
| DPCOAK      | Dephospho-CoA kinase                                     | (RH08_01935)                                              | Pantothenate and CoA Biosynthesis |
| DPR         | 2-dehydropantoate 2-reductase                            | (RH08_04910)                                              | Pantothenate and CoA Biosynthesis |
| DTMPK       | DTMP kinase                                              | (RH08_00475)                                              | Pyrimidine Metabolism             |
| DURAD       | Dihydrouracil dehydrogenase (NADP)                       | (RH08_01550)                                              | Pantothenate and CoA Biosynthesis |
| DUTPDP      | DUTP diphosphatase                                       | (RH08_04565)                                              | Pyrimidine Metabolism             |
| DXPS        | 1-deoxy-D-xylulose 5-phosphate synthase                  | (RH08_02665)                                              | Steroid biosynthesis              |
| E4PD        | Erythrose 4-phosphate dehydrogenase                      | (RH08_02745)                                              | Vitamin B6 Metabolism             |
| EAR100y     | Enoyl-[acyl-carrier-protein] reductase (NADPH) (n-C10:0) | (RH08_01695) or (RH08_05205)                              | Fatty Acid Biosynthesis           |
| EAR120y     | Enoyl-[acyl-carrier-protein] reductase (NADPH) (n-C12:0) | ((RH08_01090) and (RH08_01095))                           | Fatty Acid Biosynthesis           |
| EAR121y     | Enoyl-[acyl-carrier-protein] reductase (NADPH) (n-C12:1) | (RH08_01090) and (RH08_01095))                            | Fatty Acid Biosynthesis           |
| EAR160y     | Enoyl-[acyl-carrier-protein] reductase (NADPH) (n-C16:0) | ((RH08_01090) and (RH08_01095))                           | Fatty Acid Biosynthesis           |
| EAR161y     | Enoyl-[acyl-carrier-protein] reductase (NADPH) (n-C16:1) | (RH08_00250))                                             | Fatty Acid Biosynthesis           |
| EAR180y     | Enoyl-[acyl-carrier-protein] reductase (NADPH) (n-C18:0) | (RH08_01695) or (RH08_05205)                              | Fatty Acid Biosynthesis           |
| EAR181y     | Enoyl-[acyl-carrier-protein] reductase (NADPH) (n-C18:1) | (RH08_01695) or (RH08_05205)                              | Fatty Acid Biosynthesis           |
| EAR40y      | Enoyl-[acyl-carrier-protein] reductase (NADPH) (n-C4:0)  | (RH08_01695) or (RH08_05205)                              | Fatty Acid Biosynthesis           |
| EAR60y      | Enoyl-[acyl-carrier-protein] reductase (NADPH) (n-C6:0)  | (RH08_01695) or (RH08_05205)                              | Fatty Acid Biosynthesis           |
| EAR80y      | Enoyl-[acyl-carrier-protein] reductase (NADPH) (n-C8:0)  | (RH08_01760 and RH08_01755 and RH08_01745 and RH08_01750) | Fatty Acid Biosynthesis           |
| ETHSO3abcpp | Ethanesulfonate transport via ABC system (periplasm)     | (RH08_03060 and RH08_03055 and RH08_03735)                | Transport                         |
| FDH         | Formate dehydrogenase                                    | (RH08_03735 and RH08_03730 and RH08_03725)                | Methane Metabolism                |

|           |                                                                     |                                                                                                |                                      |
|-----------|---------------------------------------------------------------------|------------------------------------------------------------------------------------------------|--------------------------------------|
|           |                                                                     | (RH08_01090 and RH08_03230 and RH08_03215)<br>or (RH08_03235 and RH08_03230 and<br>RH08_03215) |                                      |
| FE2abc    | Iron (II) transport via ABC system                                  |                                                                                                | Transport                            |
| FERtex    | FERtex                                                              | (RH08_02330)                                                                                   | Transport                            |
| FERtpp    | FERtpp                                                              | (RH08_02330)                                                                                   | Transport                            |
| FTHFD     | Formyltetrahydrofolate deformylase                                  | (RH08_04010)                                                                                   | One Carbon pool by folate            |
| FUM       | Fumarase                                                            | (RH08_00340) or (RH08_04320) or (RH08_01235)                                                   | TCA Cycle                            |
| FUMt2_2pp | Fumarate transport via proton symport (2<br>H) (periplasm)          | (RH08_01320) or (RH08_05225)                                                                   | Transport                            |
| FUMtex    | Fumarate transport via diffusion<br>(extracellular to periplasm)    | (RH08_00340)                                                                                   | Transport                            |
| G1SAT     | Glutamate-1-semialdehyde<br>aminotransferase                        | (RH08_01540)                                                                                   | Porphyrin and Chlorophyll Metabolism |
| G3PAT120  | Glycerol-3-phosphate acyltransferase<br>(C12:0)                     | (RH08_03355)                                                                                   | Glycerophospholipid Metabolism       |
| G3PAT160  | Glycerol-3-phosphate acyltransferase<br>(C16:0)                     | (RH08_03355)                                                                                   | Glycerophospholipid Metabolism       |
| G3PAT161  | Glycerol-3-phosphate acyltransferase<br>(C16:1)                     | (RH08_03355)                                                                                   | Glycerophospholipid Metabolism       |
| G3PAT180  | Glycerol-3-phosphate acyltransferase<br>(C18:0)                     | (RH08_03355)                                                                                   | Glycerophospholipid Metabolism       |
| G3PAT181  | Glycerol-3-phosphate acyltransferase<br>(C18:1)                     | (RH08_03355)                                                                                   | Glycerophospholipid Metabolism       |
| G6PDH2r   | Glucose 6-phosphate dehydrogenase                                   | (RH08_03500)                                                                                   | Glycolysis                           |
| GART      | GAR transformylase-T                                                | (RH08_00185)                                                                                   | Purine Metabolism                    |
| GF6PTA    | Glutamine-fructose-6-phosphate<br>transaminase                      | (RH08_04175) or (RH08_01070)                                                                   | Glutamate Metabolism                 |
| GLCNt2rpp | D-gluconate transport via proton symport,<br>reversible (periplasm) | (RH08_01140)                                                                                   | Transport                            |
| GLCabcpp  | D-glucose transport via ABC system<br>(periplasm)                   | (RH08_00250) or (RH08_01090) or (RH08_03235)                                                   | Transport                            |
| GLNS      | Glutamine synthetase                                                | (RH08_00320) or (RH08_03505)                                                                   | Glutamate Metabolism                 |
| GLNTRAT   | Glutamyl-tRNA(Gln) amidotransferase                                 | (RH08_04335 and RH08_04345 and RH08_04340)                                                     | Glutamate Metabolism                 |
| GLUSy     | Glutamate synthase (NADPH)                                          | (RH08_00800)                                                                                   | Glutamate Metabolism                 |

|            |                                                                     |                                                                                                             |                                          |
|------------|---------------------------------------------------------------------|-------------------------------------------------------------------------------------------------------------|------------------------------------------|
| GLUabcpp   | L-glutamate transport via ABC system (periplasm)                    | ((RH08_00240 and RH08_04980 and RH08_00250 and RH08_00245)) or (RH08_00245) or (RH08_04985) or (RH08_00235) | Transport                                |
| GLUt4pp    | Na+/glutamate symport (periplasm)                                   | (RH08_04280)                                                                                                | Transport                                |
| GLXCL      | Glyoxalate carboligase                                              | (RH08_00865) or (RH08_02670)                                                                                | Glycolate metabolism                     |
| GLYALDtex  | Glyceraldehyde transport via diffusion (extracellular to periplasm) | (RH08_01880) or (RH08_00245)                                                                                | Transport                                |
| GLYBabcpp  | Glycine betaine transport via ABC system (periplasm)                | ((RH08_01090 and RH08_01095))                                                                               | Arginine and Proline Metabolism          |
| GLYCK      | Glycerate kinase                                                    | (RH08_04040)                                                                                                | Glycine, Serine and threonine metabolism |
| GLYCL      | Glycine Cleavage System                                             | (RH08_02655) or (RH08_04695) or (RH08_04705) or (RH08_02655) or (RH08_04695) or (RH08_04705)                | Glycine, Serine and threonine metabolism |
| GLYCLTt2pp | Glycolate transport via proton symport, reversible (periplasm)      | (RH08_02655) or (RH08_04695) or (RH08_04705)                                                                | Transport                                |
| GLYCLTtex  | Glycolate transport via diffusion (extracellular to periplasm)      | (RH08_02655) or (RH08_04695) or (RH08_04705)                                                                | Transport                                |
| GLYCL_2    | Glycine cleavage system, cytosol                                    | (RH08_04705)                                                                                                | Nitrogen Metabolism                      |
| GLYCTO1    | Glycolate oxidase                                                   | (RH08_02240)                                                                                                | Glycolate metabolism                     |
| GLYTRS     | Glycyl-tRNA synthetase                                              | (RH08_00250))                                                                                               | Glycine, Serine and threonine metabolism |
| GMPS2      | GMP synthase                                                        | ((RH08_00580) or (RH08_01330))                                                                              | Purine Metabolism                        |
| GND        | Phosphogluconate dehydrogenase                                      | (RH08_02455)                                                                                                | Pentose Phosphate Pathway                |
| GRTT       | Geranyltranstransferase                                             | (RH08_04975) or (RH08_02275)                                                                                | Steroid biosynthesis                     |
| GTHPi      | Glutathione peridoxase                                              | (RH08_05440)                                                                                                | Glutathione Metabolism                   |
| GTHS       | Glutathione synthetase                                              | (RH08_02560)                                                                                                | Glutamate Metabolism                     |
| GTPCII     | GTP cyclohydrolase II                                               | (RH08_01180)                                                                                                | Riboflavin Metabolism                    |
| HCO3_NAt   | Bicarbonate transport (Na/HCO3 cotransport)                         | (RH08_04080)                                                                                                | Transport                                |
| HEMEOS     | Heme O synthase                                                     | (RH08_01185)                                                                                                | Porphyrin and Chlorophyll Metabolism     |
| HISabcpp   | L-histidine transport via ABC system (periplasm)                    | (RH08_01095)                                                                                                | Transport                                |

|                       |                                                                   |                              |                                                |
|-----------------------|-------------------------------------------------------------------|------------------------------|------------------------------------------------|
| HMBS                  | Hydroxymethylbilane synthase                                      | (RH08_04620)                 | Porphyrin and Chlorophyll Metabolism           |
| HMGL                  | Hydroxymethylglutaryl-CoA lyase                                   | (RH08_00355)                 | Synthesis and degradation of Ketones Bodies    |
| HPPK                  | 2-amino-4-hydroxy-6-hydroxymethyldihydropteridine diphosphokinase | (RH08_05510)                 | Folate Biosynthesis                            |
| HXA <sub>tex</sub>    | Hexanoate transport via diffusion (extracellular to periplasm)    | (RH08_04080)                 | Transport                                      |
| ICDH <sub>yr</sub>    | Isocitrate dehydrogenase (NADP)                                   | (RH08_03970)                 | TCA Cycle                                      |
| ICIT <sub>tex</sub>   | Citrate transport via diffusion extracellular to periplasm        | (RH08_04285)                 | Transport                                      |
| ICL                   | Isocitrate lyase                                                  | (RH08_01780)                 | TCA Cycle                                      |
| IGPS                  | Indole-3-glycerol-phosphate synthase                              | (RH08_00090)                 | Phenylalanine Tyrosine Tryptophan Biosynthesis |
| ILE <sub>abcpp</sub>  | L-isoleucine transport via ABC system (periplasm)                 | (RH08_04285)                 | Transport                                      |
| IPDDI                 | Isopentenyl-diphosphate D-isomerase                               | (RH08_04790)                 | Steroid biosynthesis                           |
| IPDPS                 | 1-hydroxy-2-methyl-2-(E)-butenyl 4-diphosphate reductase (ipdp)   | (RH08_04585)                 | Steroid biosynthesis                           |
| IPMD                  | 3-isopropylmalate dehydrogenase                                   | (RH08_03970)                 | Valine, Leucine, and Isoleucine Metabolism     |
| IPPM <sub>1a</sub>    | 3-isopropylmalate dehydratase                                     | (RH08_01630) or (RH08_03515) | Valine, Leucine, and Isoleucine Metabolism     |
| IPPM <sub>1b</sub>    | 2-isopropylmalate hydratase                                       | (RH08_01630) or (RH08_03515) | Valine, Leucine, and Isoleucine Metabolism     |
| KARA <sub>1</sub>     | Ketol-acid reductoisomerase (2,3-dihydroxy-3-methylbutanoate)     | (RH08_05500)                 | Valine, Leucine, and Isoleucine Metabolism     |
| KARA <sub>2</sub>     | Ketol-acid reductoisomerase (2-Acetolactate)                      | (RH08_05500)                 | Valine, Leucine, and Isoleucine Metabolism     |
| KAS <sub>14</sub>     | Beta-ketoacyl-ACP synthase                                        | (RH08_01690)                 | Fatty Acid Biosynthesis                        |
| LEUTRS                | Leucyl-tRNA synthetase                                            | (RH08_02020)                 | Valine, Leucine, and Isoleucine Metabolism     |
| LEU <sub>abcpp</sub>  | L-leucine transport via ABC system (periplasm)                    | (RH08_04285 and RH08_05165)  | Transport                                      |
| LYSTRS                | Lysyl-tRNA synthetase                                             | (RH08_05010)                 | Lysine Biosynthesis                            |
| LYS <sub>abcpp</sub>  | L-lysine transport via ABC system (periplasm)                     | (RH08_05390)                 | Lysine Metabolism                              |
| MACPD                 | Malonyl-ACP decarboxylase                                         | (RH08_00250)                 | Fatty Acid Biosynthesis                        |
| MAL <sub>t2_2pp</sub> | Malate transport via proton symport (2 H) (periplasm)             | (RH08_01320)                 | Transport                                      |
| MSO <sub>3abcpp</sub> | Methanesulfonate transport via ABC system (periplasm)             | (RH08_03055)                 | Transport                                      |

|          |                                                                        |                                                                                                                                                                                                                 |                                            |
|----------|------------------------------------------------------------------------|-----------------------------------------------------------------------------------------------------------------------------------------------------------------------------------------------------------------|--------------------------------------------|
| MTHFC    | Methenyltetrahydrofolate cyclohydrolase                                | (RH08_03490)                                                                                                                                                                                                    | One Carbon pool by folate                  |
| MTHFD    | Methylenetetrahydrofolate dehydrogenase (NADP)                         | (RH08_03490)                                                                                                                                                                                                    | One Carbon pool by folate                  |
| MHPGLUT  | 5 methyltetrahydropteroyltriglutamate homocysteine S methyltransferase | (RH08_04830)                                                                                                                                                                                                    | Methionine Metabolism                      |
| NADH16pp | NADH dehydrogenase (ubiquinone-8 & 3 protons) (periplasm)              | (RH08_03705 and RH08_03710 and RH08_03715 and RH08_03720 and RH08_03725 and RH08_03730 and RH08_03735 and RH08_03740 and RH08_03745 and RH08_03750 and RH08_03755 and RH08_03760 and RH08_03765 and RH08_03770) | Oxidative Phosphorylation                  |
| NADK     | NAD kinase                                                             | (RH08_02280)                                                                                                                                                                                                    | Nicotinate and Nicotinamide                |
| NDPK1    | Nucleoside-diphosphate kinase (ATP:GDP)                                | (RH08_01330)                                                                                                                                                                                                    | Purine Metabolism                          |
| NDPK2    | Nucleoside-diphosphate kinase (ATP:UDP)                                | (RH08_01330)                                                                                                                                                                                                    | Pyrimidine Metabolism                      |
| NDPK3    | Nucleoside-diphosphate kinase (ATP:CDP)                                | (RH08_01330)                                                                                                                                                                                                    | Pyrimidine Metabolism                      |
| NDPK4    | Nucleoside-diphosphate kinase (ATP:dTDP)                               | (RH08_01330)                                                                                                                                                                                                    | Pyrimidine Metabolism                      |
| NDPK5    | Nucleoside-diphosphate kinase (ATP:dGDP)                               | (RH08_01330)                                                                                                                                                                                                    | Purine Metabolism                          |
| NDPK6    | Nucleoside-diphosphate kinase (ATP:dUDP)                               | (RH08_01330)                                                                                                                                                                                                    | Pyrimidine Metabolism                      |
| NDPK7    | Nucleoside-diphosphate kinase (ATP:dCDP)                               | (RH08_01330)                                                                                                                                                                                                    | Pyrimidine Metabolism                      |
| NDPK8    | Nucleoside-diphosphate kinase (ATP:dADP)                               | (RH08_01330)                                                                                                                                                                                                    | Purine Metabolism                          |
| NNATr    | Nicotinate-nucleotide adenylyltransferase                              | (RH08_02770)                                                                                                                                                                                                    | Nicotinate and Nicotinamide                |
| OIVD1r   | 2-oxoisovalerate dehydrogenase (acylating; 4-methyl-2-oxopentanoate)   | (RH08_04685)                                                                                                                                                                                                    | Valine, leucine and isoleucine degradation |
| OIVD2    | 2-oxoisovalerate dehydrogenase (acylating; 3-methyl-2-oxobutanoate)    | (RH08_04685)                                                                                                                                                                                                    | Valine, leucine and isoleucine degradation |
| OIVD3    | 2-oxoisovalerate dehydrogenase (acylating; 3-methyl-2-oxopentanoate)   | (RH08_04685)                                                                                                                                                                                                    | Valine, leucine and isoleucine degradation |

|           |                                                                              |                                              |                                                |
|-----------|------------------------------------------------------------------------------|----------------------------------------------|------------------------------------------------|
| ORNCD     | Ornithine cyclodeaminase                                                     | (RH08_05465) or (RH08_04635)                 | Arginine and Proline Metabolism                |
| ORNabcpp  | Ornithine transport via ABC system (periplasm)                               | (RH08_00250)                                 | Lysine Metabolism                              |
| ORPT      | Orotate phosphoribosyltransferase                                            | (RH08_04500)                                 | Pyrimidine Metabolism                          |
| PANTS     | Pantothenate synthase                                                        | (RH08_02910)                                 | Pantothenate and CoA Biosynthesis              |
| PAPPT3    | Phospho-N-acetylmuramoyl-pentapeptide-transferase (meso-2,6-diaminopimelate) | (RH08_04915)                                 | Peptidoglycan Biosynthesis                     |
| PDH       | Pyruvate dehydrogenase                                                       | (RH08_02655)                                 | Glycolysis                                     |
| PDX5POi   | Pyridoxine 5-phosphate oxidase                                               | (RH08_04290)                                 | Vitamin B6 Metabolism                          |
| PGM       | Phosphoglycerate mutase                                                      | (RH08_00775)                                 | Gluconeogenesis                                |
| PGMT      | Phosphoglucomutase                                                           | (RH08_04950)                                 | Glycolysis                                     |
| PMDPHT    | Pyrimidine phosphatase                                                       | (RH08_00220)                                 | Riboflavin Metabolism                          |
| PNTK      | Pantothenate kinase                                                          | (RH08_01890)                                 | Pantothenate and CoA Biosynthesis              |
| PPA       | Inorganic diphosphatase                                                      | (RH08_00540)                                 | Oxidative Phosphorylation                      |
| PPBNGS    | Porphobilinogen synthase                                                     | (RH08_02520)                                 | Porphyrin and Chlorophyll Metabolism           |
| PPPGO     | Protoporphyrinogen oxidase (aerobic)                                         | (RH08_04780)                                 | Porphyrin and Chlorophyll Metabolism           |
| PRAGSr    | Phosphoribosylglycinamide synthase                                           | ((RH08_00540)                                | Purine Metabolism                              |
| PRAIi     | Phosphoribosylanthranilate isomerase (irreversible)                          | (RH08_00090)                                 | Phenylalanine Tyrosine Tryptophan Biosynthesis |
| PRAIS     | Phosphoribosylaminoimidazole synthase                                        | (RH08_04315)                                 | Purine Metabolism                              |
| PRFGS     | Phosphoribosylformylglycinamidine synthase                                   | (RH08_04300)                                 | Purine Metabolism                              |
| PROabcpp  | L-proline transport via ABC system (periplasm)                               | (RH08_00250)                                 | Arginine and Proline Metabolism                |
| PRPPS     | Phosphoribosylpyrophosphate synthetase                                       | (RH08_01420)                                 | Ribose Metabolism                              |
| PSP_L     | Phosphoserine phosphatase (L-serine)                                         | (RH08_04255)                                 | Glycine, Serine and threonine metabolism       |
| PTRCabcpp | Putrescine transport via ABC system (periplasm)                              | (RH08_03060) or (RH08_03795) or (RH08_01090) | Transport                                      |
| RIBabcpp  | D-ribose transport via ABC system (periplasm)                                | (RH08_03060) or (RH08_03795)                 | Transport                                      |
| RPE       | Ribulose 5-phosphate 3-epimerase                                             | (RH08_04290)                                 | Pentose Phosphate Pathway                      |
| RPI       | Ribose-5-phosphate isomerase                                                 | (RH08_04700)                                 | Pentose Phosphate Pathway                      |
| SDPTA     | Succinyldiaminopimelate transaminase                                         | (RH08_02145))                                | Lysine Biosynthesis                            |

|               |                                                                                                       |                                                                                             |                                             |
|---------------|-------------------------------------------------------------------------------------------------------|---------------------------------------------------------------------------------------------|---------------------------------------------|
| SERAT         | Serine O-acetyltransferase                                                                            | (RH08_02620)                                                                                | Cysteine Metabolism                         |
| SERTRS        | Seryl-tRNA synthetase                                                                                 | (RH08_02630)                                                                                | Glycine, Serine and threonine metabolism    |
| SHCHF         | Sirohydrochlorin ferrochelatae                                                                        | (RH08_02970)                                                                                | Porphyrin and Chlorophyll Metabolism        |
| SOTA          | Succinylornithine transaminase                                                                        | (RH08_01540)                                                                                | Arginine and Proline Metabolism             |
| SPMDabcpp     | Spermidine transport via ABC system (periplasm)                                                       | (RH08_01380)                                                                                | Transport                                   |
| SUCD1         | Succinate dehydrogenase                                                                               | (RH08_04650 and RH08_04655 and RH08_04645)                                                  |                                             |
| SUCDi         | Succinate dehydrogenase (irreversible)                                                                | (RH08_04650 and RH08_04655 and RH08_04645)                                                  |                                             |
| SUCOAS        | Succinyl-CoA synthetase (ADP-forming)                                                                 | (RH08_04675)                                                                                | TCA Cycle                                   |
| SULabcpp      | Sulfate transport via ABC system (periplasm)                                                          | (RH08_03930)                                                                                | Sulfur Metabolism                           |
| TRSARr        | Tartronate semialdehyde reductase                                                                     | (RH08_02455)                                                                                | Glycolate metabolism                        |
| TSULabcpp     | Thiosulfate transport via ABC system (periplasm)                                                      | (RH08_03235) or (RH08_01090)                                                                | Sulfur Metabolism                           |
| UAMAS         | UDP-N-acetylmuramoyl-L-alanine synthetase                                                             | (RH08_04895)                                                                                | Glutamate metabolism                        |
| UMPK          | UMP kinase                                                                                            | (RH08_02145)                                                                                | Pyrimidine Metabolism                       |
| UPPN          | B-ureidopropionase                                                                                    | (RH08_04900)                                                                                | Pantothenate and CoA Biosynthesis           |
| UREA          | Urease                                                                                                | (RH08_03885)                                                                                | Urea cycle/amino group metabolism           |
| VANKpp        | VANKpp                                                                                                | (RH08_04285)                                                                                | Transport                                   |
| VANLNtex      | VANLNtex                                                                                              | (RH08_04285)                                                                                | Transport                                   |
| VANLTtex      | VANLTtex                                                                                              | (RH08_04285)                                                                                | Transport                                   |
| VNLNpp        | VNLNpp                                                                                                | (RH08_04285)                                                                                | Transport                                   |
| pentso3abcpp  | Pentso3abcpp                                                                                          | (RH08_03060)                                                                                | Transport                                   |
| ACOLIPAabctex | Arabinose modified core oligosaccharide lipid A transport via ABC system (periplasm to extracellular) | (RH08_02330 and RH08_01345) or (RH08_03335) or (RH08_03235) or (RH08_00085) or (RH08_02520) | Lipopolysaccharide Biosynthesis / Recycling |
| ALATA_D2      | D-alanine transaminase                                                                                | (RH08_01135 or RH08_04735)                                                                  | Cofactor and Prosthetic Group Biosynthesis  |
| ALATA_L2      | Alanine transaminase                                                                                  | (RH08_01135 or RH08_04735)                                                                  | Cofactor and Prosthetic Group Biosynthesis  |
| AMPTASECG     | Alanyl aminopeptidase (cys-gly)                                                                       | (RH08_01340)                                                                                | Cysteine Metabolism                         |
| AMPTASEPG     | Aminopeptidase (pro-gly)                                                                              | (RH08_04870 or RH08_04735)                                                                  | Arginine and Proline Metabolism             |



|                  |                                                                                                                        |                                                                                         |                                             |
|------------------|------------------------------------------------------------------------------------------------------------------------|-----------------------------------------------------------------------------------------|---------------------------------------------|
| ASCBptspp        | L-ascorbate transport via PEP:Pyr PTS (periplasm)                                                                      | (RH08_00245 and RH08_00240 and RH08_04980 and RH08_04980) or (RH08_05215)               | Transport, Inner Membrane                   |
| BUTSO3abcpp      | Butanesulfonate transport via ABC system (periplasm)                                                                   | (RH08_03060 and RH08_03055 and RH08_01095)                                              | Transport, Inner Membrane                   |
| CLIPAabctex      | Cold lipid A transport via ABC system (periplasm to extracellular)                                                     | (RH08_02405 and RH08_01345 and RH08_02330 and RH08_02325 and RH08_01355 and RH08_01605) | Lipopolysaccharide Biosynthesis / Recycling |
| COLIPAPabctex    | Core oligosaccharide lipid A diphosphate transport via ABC system (periplasm to extracellular)                         | (RH08_01345 and RH08_02325 and RH08_02330)                                              | Lipopolysaccharide Biosynthesis / Recycling |
| COLIPAabctex     | Core oligosaccharide lipid A transport via ABC system (periplasm to extracellular)                                     | (RH08_01345 and RH08_02325 and RH08_02330)                                              | Lipopolysaccharide Biosynthesis / Recycling |
| CRNDabcpp        | D-carnitine transport via ABC system (periplasm)                                                                       | (RH08_01095 and RH08_01090) or (RH08_02520) or (RH08_03060) or (RH08_03235)             | Transport, Inner Membrane                   |
| CYSSADS          | L-cysteine sulfinic acid desulfurase                                                                                   | (RH08_04870 or RH08_04735)                                                              | Cysteine Metabolism                         |
| ECA4COLIPAabctex | Enterobacterial common antigen (x4) core oligosaccharide lipid A transport via ABC system (periplasm to extracellular) | (RH08_02325 and RH08_02405 and RH08_02330 and RH08_01345)                               | Lipopolysaccharide Biosynthesis / Recycling |
| ENLIPAabctex     | Phosphoethanolamine lipid A transport via ABC system (periplasm to extracellular)                                      | (RH08_02330 and RH08_01345 and RH08_02325)                                              | Lipopolysaccharide Biosynthesis / Recycling |
| GRXR             | Glutaredoxin reductase                                                                                                 | (RH08_04290)                                                                            | Unassigned                                  |
| K2L4Aabctex      | KDO(2)-lipid IV A transport via ABC system (periplasm to extracellular)                                                | (RH08_04040)                                                                            | Lipopolysaccharide Biosynthesis / Recycling |
| KAS15            | Beta-ketoacyl-ACP synthase (2)                                                                                         | (RH08_03360)                                                                            | Membrane Lipid Metabolism                   |
| KDOPS            | 3-deoxy -D-manno-octulosonic -acid 8-phosphate synthase                                                                | (RH08_02685)                                                                            | Lipopolysaccharide Biosynthesis / Recycling |
| LIPAabctex       | Lipid A transport via ABC system (periplasm to extracellular)                                                          | (RH08_04040)                                                                            | Lipopolysaccharide Biosynthesis / Recycling |

|                       |                                                                                                     |                                                                                                                                                                                                                 |                                             |
|-----------------------|-----------------------------------------------------------------------------------------------------|-----------------------------------------------------------------------------------------------------------------------------------------------------------------------------------------------------------------|---------------------------------------------|
| NADH17pp              | NADH dehydrogenase (menaquinone-8 & 3 protons) (periplasm)                                          | (RH08_03705 and RH08_03710 and RH08_03715 and RH08_03720 and RH08_03725 and RH08_03730 and RH08_03735 and RH08_03740 and RH08_03745 and RH08_03750 and RH08_03755 and RH08_03760 and RH08_03765 and RH08_03770) | Oxidative Phosphorylation                   |
| NADH18pp              | NADH dehydrogenase (demethylmenaquinone-8 & 3 protons) (periplasm)                                  | (RH08_03705 and RH08_03710 and RH08_03715 and RH08_03720 and RH08_03725 and RH08_03730 and RH08_03735 and RH08_03740 and RH08_03745 and RH08_03750 and RH08_03755 and RH08_03760 and RH08_03765 and RH08_03770) | Oxidative Phosphorylation                   |
| NADHHR                | NADH hydratase                                                                                      | (RH08_02745)                                                                                                                                                                                                    | Metabolite Repair                           |
| NADHHS                | NADH hydratase                                                                                      | (RH08_02745)                                                                                                                                                                                                    | Metabolite Repair                           |
| NADPHHR               | NADPH hydratase                                                                                     | (RH08_02745)                                                                                                                                                                                                    | Metabolite Repair                           |
| NADPHHS               | NADPH hydratase                                                                                     | (RH08_02745)                                                                                                                                                                                                    | Metabolite Repair                           |
| O16A4COLIPAab<br>ctex | O16 antigen (x4) core oligosaccharide lipid A transport via ABC system (periplasm to extracellular) | (RH08_02320 and RH08_02325 and RH08_02330)                                                                                                                                                                      | Lipopolysaccharide Biosynthesis / Recycling |
| OCTDPS                | Octaprenyl pyrophosphate synthase                                                                   | (RH08_01330))                                                                                                                                                                                                   | Cofactor and Prosthetic Group Biosynthesis  |
| OMBZLM                | 2-Octaprenyl-6-methoxy-benzoquinol methylase                                                        | (RH08_01330))                                                                                                                                                                                                   | Cofactor and Prosthetic Group Biosynthesis  |
| RNDR3b                | Ribonucleoside-diphosphate reductase (CDP) (glutaredoxin)                                           | (RH08_03510 and RH08_03665) or (RH08_04275)                                                                                                                                                                     | Nucleotide Salvage Pathway                  |
| RNDR4b                | Ribonucleoside-diphosphate reductase (UDP) (glutaredoxin)                                           | (RH08_02210)                                                                                                                                                                                                    | Nucleotide Salvage Pathway                  |
| S2FE2SR               | SUF [2Fe-2S] regeneration                                                                           | (RH08_04430 and RH08_04735 and RH08_04730 and RH08_04725)                                                                                                                                                       | Cofactor and Prosthetic Group Biosynthesis  |
| S2FE2SS               | SUF [2Fe-2S] Synthesis                                                                              | (RH08_04430 and RH08_04735 and RH08_04730 and RH08_04725)                                                                                                                                                       | Cofactor and Prosthetic Group Biosynthesis  |
| S2FE2SS2              | SUF [2Fe-2S] Synthesis II                                                                           | (RH08_04430 and RH08_04735 and RH08_04730 and RH08_04725)                                                                                                                                                       | Cofactor and Prosthetic Group Biosynthesis  |
| S2FE2ST               | SUF [2Fe-2S] Transfer                                                                               | (RH08_04430 and RH08_04735 and RH08_04730 and RH08_04725)                                                                                                                                                       | Cofactor and Prosthetic Group Biosynthesis  |
| S4FE4SR               | SUF [4Fe-4S] Reduction                                                                              | (RH08_04430 and RH08_04735 and RH08_04730 and RH08_04725)                                                                                                                                                       | Cofactor and Prosthetic Group Biosynthesis  |

|               |                                                                     |                                                                                                   |                                            |
|---------------|---------------------------------------------------------------------|---------------------------------------------------------------------------------------------------|--------------------------------------------|
| S4FE4ST       | SUF [4Fe-4S] Transfer                                               | (RH08_04430 and RH08_04735 and RH08_04730 and RH08_04725)                                         | Cofactor and Prosthetic Group Biosynthesis |
| SCYSDS        | SUF Cysteine desulfuration                                          | (RH08_04735)                                                                                      | Cofactor and Prosthetic Group Biosynthesis |
| FEex          | Iron transporter                                                    | ((RH08_04040 and RH08_03155) or (RH08_00355))                                                     | iron metabolism                            |
| FEpp          | Iron transporter                                                    | (RH08_03155 and RH08_04040)                                                                       | iron metabolism                            |
| Kt3pp         | Potassium transport out via proton antiport (periplasm)             | (RH08_04075)                                                                                      | Inorganic Ion Transport and Metabolism     |
| 2DHGLCNkt_tpp | 2DHGLCNkt tpp                                                       | (VBICanLib238577_0746)                                                                            | Transport                                  |
| 3OAR141       | 3-oxoacyl-[acyl-carrier-protein] reductase (n-C14:1)                | (VBICanLib238577_0692) or (VBICanLib238577_0223) or (VBICanLib238577_0358)                        | Fatty Acid Biosynthesis                    |
| 3OAS120       | 3-oxoacyl-[acyl-carrier-protein] synthase (n-C12:0)                 | (VBICanLib238577_0357 and VBICanLib238577_0694)                                                   | Fatty Acid Biosynthesis                    |
| 4HTHRS        | 4-Hydroxy-L-threonine synthase                                      | (VBICanLib238577_0361)                                                                            | Vitamin B6 Metabolism                      |
| ACCOAC        | Acetyl-CoA carboxylase                                              | (VBICanLib238577_0399 and VBICanLib238577_0145 and VBICanLib238577_0637 and VBICanLib238577_0146) | Fatty Acid Biosynthesis                    |
| ACGS          | N-acetylglutamate synthase                                          | (VBICanLib238577_0381) or (VBICanLib238577_0209)                                                  | Urea cycle/amino group metabolism          |
| ACHBS         | 2-aceto-2-hydroxybutanoate synthase                                 | (VBICanLib238577_0003)                                                                            | Valine, Leucine, and Isoleucine Metabolism |
| ACOATA        | Acetyl-CoA ACP transacylase                                         | (VBICanLib238577_0727)                                                                            | Fatty Acid Biosynthesis                    |
| ACONT         | Aconitate hydratase                                                 | (VBICanLib238577_0345)                                                                            | TCA Cycle                                  |
| ACONTa        | Aconitase (half-reaction A, Citrate hydro-lyase)                    | ((VBICanLib238577_0345))                                                                          | TCA Cycle                                  |
| ACONTb        | Aconitase (half-reaction B, Isocitrate hydro-lyase)                 | (VBICanLib238577_0345))                                                                           | TCA Cycle                                  |
| ADSL1r        | Adenylosuccinate lyase                                              | (VBICanLib238577_0886)                                                                            | Purine Metabolism                          |
| ADSL2r        | Adenylosuccinate lyase                                              | (VBICanLib238577_0886) or (VBICanLib238577_0061) or (VBICanLib238577_0260)                        | Purine Metabolism                          |
| AGPAT120      | 1-tetradecanoyl-sn-glycerol 3-phosphate O-acyltransferase (n-C12:0) | (VBICanLib238577_0645)                                                                            | Glycerophospholipid Metabolism             |
| AGPAT160      | 1-hexadecanoyl-sn-glycerol 3-phosphate O-acyltransferase (n-C16:0)  | (VBICanLib238577_0645)                                                                            | Glycerophospholipid Metabolism             |

|           |                                                                       |                                                                                                                                                                    |                                                |
|-----------|-----------------------------------------------------------------------|--------------------------------------------------------------------------------------------------------------------------------------------------------------------|------------------------------------------------|
| AGPAT161  | 1-hexadec-7-enoyl-sn-glycerol 3-phosphate O-acyltransferase (n-C16:1) | (VBICanLib238577_0645)                                                                                                                                             | Glycerophospholipid Metabolism                 |
| AGPAT180  | 1-octadecanoyl-sn-glycerol 3-phosphate O-acyltransferase (n-C18:0)    | (VBICanLib238577_0645)                                                                                                                                             | Glycerophospholipid Metabolism                 |
| AGPAT181  | 1-octadec-7-enoyl-sn-glycerol 3-phosphate O-acyltransferase (n-C18:1) | (VBICanLib238577_0645)                                                                                                                                             | Glycerophospholipid Metabolism                 |
| AICART    | Phosphoribosylaminoimidazolecarboxamide formyltransferase             | (VBICanLib238577_0559)<br>(VBICanLib238577_0693) and<br>(VBICanLib238577_0691))                                                                                    | Purine Metabolism                              |
| AKGDH     | 2-Oxoglutarate dehydrogenase                                          | (VBICanLib238577_1111)                                                                                                                                             | TCA Cycle                                      |
| ALAALAr   | D-alanine-D-alanine ligase (reversible)                               | (VBICanLib238577_0975) and<br>(VBICanLib238577_0973) and<br>(VBICanLib238577_0974))                                                                                | Peptidoglycan Biosynthesis                     |
| ALATRS    | Alanyl-tRNA synthetase                                                | (VBICanLib238577_0305)                                                                                                                                             | Alanine and Aspartate Metabolism               |
| ANPRT     | Anthranilate phosphoribosyltransferase                                | (VBICanLib238577_0305)                                                                                                                                             | Phenylalanine Tyrosine Tryptophan Biosynthesis |
| ANS       | Anthranilate synthase                                                 | (VBICanLib238577_0110)                                                                                                                                             | Phenylalanine Tyrosine Tryptophan Biosynthesis |
| ARGSS     | Argininosuccinate synthase                                            | (VBICanLib238577_0277)                                                                                                                                             | Arginine and Proline Metabolism                |
| ARGabcpp  | L-arginine transport via ABC system (periplasm)                       | (VBICanLib238577_0189)                                                                                                                                             | Transport                                      |
| ASAD      | Aspartate-semialdehyde dehydrogenase                                  | (VBICanLib238577_0222)                                                                                                                                             | Lysine Biosynthesis                            |
| ASNS1     | Asparagine synthase (glutamine-hydrolysing)                           | (VBICanLib238577_0041 and<br>VBICanLib238577_0040 and<br>VBICanLib238577_1037) or<br>(VBICanLib238577_1038)                                                        | Alanine and Aspartate Metabolism               |
| ASPabcpp  | L-aspartate transport via ABC system (periplasm)                      | (VBICanLib238577_0277) or<br>(VBICanLib238577_1103)                                                                                                                | Transport                                      |
| ASPt2_2pp | Aspartate transport via proton symport (2 H) (periplasm)              | (VBICanLib238577_0361)                                                                                                                                             | Transport                                      |
| ATPPRT    | ATP phosphoribosyltransferase                                         | (VBICanLib238577_0608 and<br>VBICanLib238577_0611 and<br>VBICanLib238577_1012 and<br>VBICanLib238577_0609 and<br>VBICanLib238577_0607 and<br>VBICanLib238577_0610) | Histidine Metabolism                           |
| ATPS4rpp  | ATP synthase (four protons for one ATP) (periplasm)                   |                                                                                                                                                                    | Oxidative Phosphorylation                      |

|            |                                                                    |                                                                                                                                                          |                                          |
|------------|--------------------------------------------------------------------|----------------------------------------------------------------------------------------------------------------------------------------------------------|------------------------------------------|
| BZt1pp     | Benzoate transport in via proton symport (periplasm)               | (VBICanLib238577_0277)                                                                                                                                   | B-Ketoadipate pathway                    |
|            |                                                                    | (VBICanLib238577_0228 and VBICanLib238577_0227) or (VBICanLib238577_0520) or (VBICanLib238577_0629) or (VBICanLib238577_0667)                            |                                          |
| CHLabcpp   | Choline transport via ABC system (periplasm)                       | (VBICanLib238577_0361)                                                                                                                                   | Transport                                |
| CHOLS_ex   | CHOLS LPAREN ex RPAREN                                             | (VBICanLib238577_0361)                                                                                                                                   | Transport                                |
| DAPE       | Diaminopimelate epimerase                                          | (VBICanLib238577_0513)                                                                                                                                   | Lysine Biosynthesis                      |
|            |                                                                    | (VBICanLib238577_02299) or (VBICanLib238577_0228 and VBICanLib238577_0227) or (VBICanLib238577_0520) or (VBICanLib238577_0629) or (VBICanLib238577_0667) |                                          |
| CHOLSabc   | CHOLSabc                                                           | (VBICanLib238577_0667)                                                                                                                                   | Glycine, Serine and threonine metabolism |
|            | Citrate transport via diffusion (extracellular to periplasm)       | (VBICanLib238577_0813)                                                                                                                                   | Transport                                |
| CITtex     |                                                                    |                                                                                                                                                          |                                          |
|            | Cobalt (Co+2) transport via diffusion (extracellular to periplasm) | (VBICanLib238577_0628)                                                                                                                                   | Transport                                |
| COBALT2tex |                                                                    |                                                                                                                                                          |                                          |
|            | Cobalt transport in via permease (no H+)                           | (VBICanLib238577_0628)                                                                                                                                   | Transport                                |
| COBALT2tpp |                                                                    | (VBICanLib238577_0227 and VBICanLib238577_0629 and VBICanLib238577_0228)                                                                                 |                                          |
| CRNabcpp   | L-carnitine transport via ABC system (periplasm)                   | ((VBICanLib238577_0227) and (VBICanLib238577_0228))                                                                                                      | Transport                                |
| CS         | Citrate synthase                                                   | ((VBICanLib238577_0227) and (VBICanLib238577_0228))                                                                                                      | TCA Cycle                                |
| CTPS2      | CTP synthase (glutamine)                                           | (VBICanLib238577_0370 and VBICanLib238577_0371)                                                                                                          | Pyrimidine Metabolism                    |
| CYO1b      | CYO1b                                                              | (VBICanLib238577_0729) or (VBICanLib238577_0729))                                                                                                        | Oxidative Phosphorylation                |
|            | L-cysteine uptake via ABC system (periplasm)                       |                                                                                                                                                          | Transport                                |
| CYSabcpp   |                                                                    |                                                                                                                                                          |                                          |
| DAPDC      | Diaminopimelate decarboxylase                                      | (VBICanLib238577_0261)                                                                                                                                   | Lysine Biosynthesis                      |
| DASYN120   | CDP-diacylglycerol synthetase (n-C12:0)                            | (VBICanLib238577_0447)                                                                                                                                   | Glycerophospholipid Metabolism           |
| DASYN160   | CDP-diacylglycerol synthetase (n-C16:0)                            | (VBICanLib238577_0447)                                                                                                                                   | Glycerophospholipid Metabolism           |

|          |                                                          |                                                                              |                                                |
|----------|----------------------------------------------------------|------------------------------------------------------------------------------|------------------------------------------------|
| DASYN161 | CDP-diacylglycerol synthetase (n-C16:1)                  | (VBICanLib238577_0447)                                                       | Glycerophospholipid Metabolism                 |
| DASYN180 | CDP-diacylglycerol synthetase (n-C18:0)                  | (VBICanLib238577_0447)                                                       | Glycerophospholipid Metabolism                 |
| DASYN181 | CDP-diacylglycerol synthetase (n-C18:1)                  | (VBICanLib238577_0447)                                                       | Glycerophospholipid Metabolism                 |
| DB4PS    | 3,4-Dihydroxy-2-butanone-4-phosphate synthase            | (VBICanLib238577_0249)                                                       | Riboflavin Metabolism                          |
| DDPA     | 3-deoxy-D-arabino-heptulosonate 7-phosphate synthetase   | (VBICanLib238577_0553)<br>(VBICanLib238577_0227 and<br>VBICanLib238577_0228) | Phenylalanine Tyrosine Tryptophan Biosynthesis |
| DHDPS    | Dihydrodipicolinate synthase                             | (VBICanLib238577_0183)                                                       | Lysine Biosynthesis                            |
| DHPM1    | Dihydropyrimidinase (5,6-dihydrouracil)                  | (VBICanLib238577_1036) or<br>(VBICanLib238577_0469)                          | Pantothenate and CoA Biosynthesis              |
| DMATT    | Dimethylallyltranstransferase                            | (VBICanLib238577_0710) or<br>(VBICanLib238577_0709)                          | Steroid biosynthesis                           |
| DNAMTn2r | DNA (cytosine-5-)-methyltransferase                      | (VBICanLib238577_0208)                                                       | Methionine Metabolism                          |
| DNTPPA   | Dihydroneopterin triphosphate pyrophosphatase            | (VBICanLib238577_0401)                                                       | Folate Biosynthesis                            |
| DPCOAK   | Dephospho-CoA kinase                                     | (VBICanLib238577_1024)                                                       | Pantothenate and CoA Biosynthesis              |
| DPR      | 2-dehydropantoate 2-reductase                            | (VBICanLib238577_0094)                                                       | Pantothenate and CoA Biosynthesis              |
| DTMPK    | DTMP kinase                                              | (VBICanLib238577_0327)                                                       | Pyrimidine Metabolism                          |
| DURAD    | Dihydrouracil dehydrogenase (NADP)                       | (VBICanLib238577_0949)                                                       | Pantothenate and CoA Biosynthesis              |
| DUTPDP   | DUTP diphosphatase                                       | (VBICanLib238577_0548)                                                       | Pyrimidine Metabolism                          |
| DXPS     | 1-deoxy-D-xylulose 5-phosphate synthase                  | (VBICanLib238577_0569)                                                       | Steroid biosynthesis                           |
| E4PD     | Erythrose 4-phosphate dehydrogenase                      | (VBICanLib238577_0358) or<br>(VBICanLib238577_1098)                          | Vitamin B6 Metabolism                          |
| EAR100y  | Enoyl-[acyl-carrier-protein] reductase (NADPH) (n-C10:0) | (VBICanLib238577_1098) or<br>(VBICanLib238577_1098)                          | Fatty Acid Biosynthesis                        |
| EAR120y  | Enoyl-[acyl-carrier-protein] reductase (NADPH) (n-C12:0) | (VBICanLib238577_0358) or<br>(VBICanLib238577_0692)                          | Fatty Acid Biosynthesis                        |
| EAR121y  | Enoyl-[acyl-carrier-protein] reductase (NADPH) (n-C12:1) | ((VBICanLib238577_0228) and<br>(VBICanLib238577_0227)                        | Fatty Acid Biosynthesis                        |
| EAR160y  | Enoyl-[acyl-carrier-protein] reductase (NADPH) (n-C16:0) | (VBICanLib238577_0358) or<br>(VBICanLib238577_1098)                          | Fatty Acid Biosynthesis                        |

|             |                                                               |                                                                                                    |                                      |
|-------------|---------------------------------------------------------------|----------------------------------------------------------------------------------------------------|--------------------------------------|
| EAR161y     | Enoyl-[acyl-carrier-protein] reductase (NADPH) (n-C16:1)      | ((VBICanLib238577_0227) and (VBICanLib238577_0228))                                                | Fatty Acid Biosynthesis              |
| EAR180y     | Enoyl-[acyl-carrier-protein] reductase (NADPH) (n-C18:0)      | (VBICanLib238577_0358) or (VBICanLib238577_1098)                                                   | Fatty Acid Biosynthesis              |
| EAR181y     | Enoyl-[acyl-carrier-protein] reductase (NADPH) (n-C18:1)      | (VBICanLib238577_0358) or (VBICanLib238577_1098)                                                   | Fatty Acid Biosynthesis              |
| EAR40y      | Enoyl-[acyl-carrier-protein] reductase (NADPH) (n-C4:0)       | (VBICanLib238577_0358) or (VBICanLib238577_1098)                                                   | Fatty Acid Biosynthesis              |
| EAR60y      | Enoyl-[acyl-carrier-protein] reductase (NADPH) (n-C6:0)       | (VBICanLib238577_0692)                                                                             | Fatty Acid Biosynthesis              |
| EAR80y      | Enoyl-[acyl-carrier-protein] reductase (NADPH) (n-C8:0)       | (VBICanLib238577_0371 and VBICanLib238577_0370 and VBICanLib238577_0368 and VBICanLib238577_0369)  | Fatty Acid Biosynthesis              |
| ETHSO3abcpp | Ethanesulfonate transport via ABC system (periplasm)          | (VBICanLib238577_0629 and VBICanLib238577_0628 and VBICanLib238577_0760)                           | Transport                            |
| FDH         | Formate dehydrogenase                                         | (VBICanLib238577_0760 and VBICanLib238577_0759 and VBICanLib238577_0758)                           | Methane Metabolism                   |
| FE2abc      | Iron (II) transport via ABC system                            | (VBICanLib238577_0227) or (VBICanLib238577_0667 and VBICanLib238577_0666 and VBICanLib238577_0663) | Transport                            |
| FERtex      | FERtex                                                        | (VBICanLib238577_0481)                                                                             | Transport                            |
| FERtpp      | FERtpp                                                        | (VBICanLib238577_0481)                                                                             | Transport                            |
| FTHFD       | Formyltetrahydrofolate deformylase                            | (VBICanLib238577_0815)                                                                             | One Carbon pool by folate            |
| FUM         | Fumarase                                                      | (VBICanLib238577_0061) or (VBICanLib238577_0886) or (VBICanLib238577_0260)                         | TCA Cycle                            |
| FUMt2_2pp   | Fumarate transport via proton symport (2 H) (periplasm)       | (VBICanLib238577_0277) or (VBICanLib238577_1103)                                                   | Transport                            |
| FUMtex      | Fumarate transport via diffusion (extracellular to periplasm) | (VBICanLib238577_0061)                                                                             | Transport                            |
| G1SAT       | Glutamate-1-semialdehyde aminotransferase                     | (VBICanLib238577_0325) or (VBICanLib238577_0385)                                                   | Porphyrin and Chlorophyll Metabolism |

|           |                                                                  |                                                                                                                                                                                 |                                |
|-----------|------------------------------------------------------------------|---------------------------------------------------------------------------------------------------------------------------------------------------------------------------------|--------------------------------|
| G3PAT120  | Glycerol-3-phosphate acyltransferase (C12:0)                     | (VBICanLib238577_0693)                                                                                                                                                          | Glycerophospholipid Metabolism |
| G3PAT160  | Glycerol-3-phosphate acyltransferase (C16:0)                     | (VBICanLib238577_0693)                                                                                                                                                          | Glycerophospholipid Metabolism |
| G3PAT161  | Glycerol-3-phosphate acyltransferase (C16:1)                     | (VBICanLib238577_0693)                                                                                                                                                          | Glycerophospholipid Metabolism |
| G3PAT180  | Glycerol-3-phosphate acyltransferase (C18:0)                     | (VBICanLib238577_0693)                                                                                                                                                          | Glycerophospholipid Metabolism |
| G3PAT181  | Glycerol-3-phosphate acyltransferase (C18:1)                     | (VBICanLib238577_0693)                                                                                                                                                          | Glycerophospholipid Metabolism |
| G6PDH2r   | Glucose 6-phosphate dehydrogenase                                | (VBICanLib238577_0721)                                                                                                                                                          | Glycolysis                     |
| GART      | GAR transformylase-T                                             | (VBICanLib238577_0025)                                                                                                                                                          | Purine Metabolism              |
| GF6PTA    | Glutamine-fructose-6-phosphate transaminase                      | (VBICanLib238577_0850) or (VBICanLib238577_0222)                                                                                                                                | Glutamate Metabolism           |
| GLCNt2rpp | D-gluconate transport via proton symport, reversible (periplasm) | (VBICanLib238577_0238)                                                                                                                                                          | Transport                      |
| GLCabcpp  | D-glucose transport via ABC system (periplasm)                   | (VBICanLib238577_0042) or (VBICanLib238577_0227) or (VBICanLib238577_0667)                                                                                                      | Transport                      |
| GLNS      | Glutamine synthetase                                             | (VBICanLib238577_0055) or (VBICanLib238577_0722)                                                                                                                                | Glutamate Metabolism           |
| GLNTRAT   | Glutamyl-tRNA(Gln) amidotransferase                              | (VBICanLib238577_0891 and VBICanLib238577_0893 and VBICanLib238577_0892)                                                                                                        | Glutamate Metabolism           |
| GLUSy     | Glutamate synthase (NADPH)                                       | (VBICanLib238577_0163)                                                                                                                                                          | Glutamate Metabolism           |
| GLUabcpp  | L-glutamate transport via ABC system (periplasm)                 | (VBICanLib238577_0040 and VBICanLib238577_1037 and VBICanLib238577_0042 and VBICanLib238577_0041) or (VBICanLib238577_0041) or (VBICanLib238577_1038) or (VBICanLib238577_0039) | Transport                      |
| GLUt4pp   | Na <sup>+</sup> /glutamate symport (periplasm)                   | (VBICanLib238577_0877)                                                                                                                                                          | Transport                      |
| GLXCL     | Glyoxalate carboligase                                           | (VBICanLib238577_0177) or (VBICanLib238577_0549)                                                                                                                                | Glycolate metabolism           |



|             |                                                                     |                                                                                                                                                          |                                          |
|-------------|---------------------------------------------------------------------|----------------------------------------------------------------------------------------------------------------------------------------------------------|------------------------------------------|
| GLYALDtex   | Glyceraldehyde transport via diffusion (extracellular to periplasm) | (VBICanLib238577_0389) or (VBICanLib238577_0041)                                                                                                         | Transport                                |
| GLYBabcpp   | Glycine betaine transport via ABC system (periplasm)                | (VBICanLib238577_0227 and VBICanLib238577_0228)                                                                                                          | Arginine and Proline Metabolism          |
| GLYCK       | Glycerate kinase                                                    | (VBICanLib238577_0822) or (VBICanLib238577_1138)                                                                                                         | Glycine, Serine and threonine metabolism |
| GLYCL       | Glycine Cleavage System                                             | (VBICanLib238577_0546) or (VBICanLib238577_0975) or (VBICanLib238577_0977) or (VBICanLib238577_0546) or (VBICanLib238577_0975) or (VBICanLib238577_0977) | Glycine, Serine and threonine metabolism |
| GLYCLTt2rpp | Glycolate transport via proton symport, reversible (periplasm)      | (VBICanLib238577_0546) or (VBICanLib238577_0975) or (VBICanLib238577_0977) or (VBICanLib238577_0546) or (VBICanLib238577_0975) or (VBICanLib238577_0977) | Transport                                |
| GLYCLTtex   | Glycolate transport via diffusion (extracellular to periplasm)      | (VBICanLib238577_0546) or (VBICanLib238577_0975) or (VBICanLib238577_0977) or (VBICanLib238577_0546) or (VBICanLib238577_0975) or (VBICanLib238577_0977) | Transport                                |
| GLYCL_2     | Glycine cleavage system, cytosol                                    | (VBICanLib238577_0977)                                                                                                                                   | Nitrogen Metabolism                      |
| GLYCTO1     | Glycolate oxidase                                                   | (VBICanLib238577_0463)                                                                                                                                   | Glycolate metabolism                     |
| GLYTRS      | Glycyl-tRNA synthetase                                              | (VBICanLib238577_1019 and VBICanLib238577_0467)                                                                                                          | Glycine, Serine and threonine metabolism |
| GMPS2       | GMP synthase                                                        | (VBICanLib238577_0117) or (VBICanLib238577_0279)                                                                                                         | Purine Metabolism                        |
| GND         | Phosphogluconate dehydrogenase                                      | (VBICanLib238577_0507) or (VBICanLib238577_0315)                                                                                                         | Pentose Phosphate Pathway                |

|          |                                                                          |                                                     |                                                |
|----------|--------------------------------------------------------------------------|-----------------------------------------------------|------------------------------------------------|
| GRTT     | Geranyltranstransferase                                                  | (VBICanLib238577_1036) or<br>(VBICanLib238577_0469) | Steroid biosynthesis                           |
| GTHPi    | Glutathione peridoxase                                                   | (VBICanLib238577_1189)                              | Glutathione Metabolism                         |
| GTHS     | Glutathione synthetase                                                   | (VBICanLib238577_0528)                              | Glutamate Metabolism                           |
| GTPCII   | GTP cyclohydrolase II                                                    | (VBICanLib238577_0249)                              | Riboflavin Metabolism                          |
| HCO3_NAt | Bicarbonate transport (Na/HCO3<br>cotransport)                           | (VBICanLib238577_0830)                              | Transport                                      |
| HEMEOS   | Heme O synthase                                                          | (VBICanLib238577_0250)                              | Porphyrin and Chlorophyll Metabolism           |
| HISabcpp | L-histidine transport via ABC system<br>(periplasm)                      | (VBICanLib238577_0228 and<br>VBICanLib238577_0932)  | Transport                                      |
| HMBS     | Hydroxymethylbilane synthase                                             | (VBICanLib238577_0959)                              | Porphyrin and Chlorophyll Metabolism           |
| HMGL     | Hydroxymethylglutaryl-CoA lyase                                          | (VBICanLib238577_0065)                              | Synthesis and degradation of Ketones Bodies    |
| HPPK     | 2-amino-4-hydroxy-6-<br>hydroxymethyldihydropteridine<br>diphosphokinase | (VBICanLib238577_1082)                              | Folate Biosynthesis                            |
| HXAteX   | Hexanoate transport via diffusion<br>(extracellular to periplasm)        | (VBICanLib238577_0830)                              | Transport                                      |
| ICDHyr   | Isocitrate dehydrogenase (NADP)                                          | (VBICanLib238577_0807)                              | TCA Cycle                                      |
| ICITtex  | Citrate transport via diffusion<br>extracellular to periplasm            | (VBICanLib238577_0879)                              | Transport                                      |
| ICL      | Isocitrate lyase                                                         | (VBICanLib238577_0375)                              | TCA Cycle                                      |
| IGPS     | Indole-3-glycerol-phosphate synthase                                     | (VBICanLib238577_0003)                              | Phenylalanine Tyrosine Tryptophan Biosynthesis |
| ILEabcpp | L-isoleucine transport via ABC system<br>(periplasm)                     | (VBICanLib238577_0879)                              | Transport                                      |
| IPDPS    | 1-hydroxy-2-methyl-2-(E)-butenyl 4-<br>diphosphate reductase (ipdp)      | (VBICanLib238577_0952)                              | Steroid biosynthesis                           |
| IPMD     | 3-isopropylmalate dehydrogenase                                          | (VBICanLib238577_0807)                              | Valine, Leucine, and Isoleucine Metabolism     |
| IPPMIa   | 3-isopropylmalate dehydratase                                            | (VBICanLib238577_0345) or<br>(VBICanLib238577_0724) | Valine, Leucine, and Isoleucine Metabolism     |
| IPPMIb   | 2-isopropylmalate hydratase                                              | (VBICanLib238577_0345) or<br>(VBICanLib238577_0724) | Valine, Leucine, and Isoleucine Metabolism     |
| KARA1    | Ketol-acid reductoisomerase (2,3-<br>dihydroxy-3-methylbutanoate)        | (VBICanLib238577_1203) or<br>(VBICanLib238577_1163) | Valine, Leucine, and Isoleucine Metabolism     |
| KARA2    | Ketol-acid reductoisomerase (2-<br>Acetolactate)                         | (VBICanLib238577_1203) or<br>(VBICanLib238577_1163) | Valine, Leucine, and Isoleucine Metabolism     |
| KAS14    | Beta-ketoacyl-ACP synthase                                               | (VBICanLib238577_0357)                              | Fatty Acid Biosynthesis                        |

|           |                                                                        |                                                                                                                                                                                                                                                                                                                                                             |                                            |
|-----------|------------------------------------------------------------------------|-------------------------------------------------------------------------------------------------------------------------------------------------------------------------------------------------------------------------------------------------------------------------------------------------------------------------------------------------------------|--------------------------------------------|
| LEUTRS    | Leucyl-tRNA synthetase                                                 | (VBICanLib238577_0418)                                                                                                                                                                                                                                                                                                                                      | Valine, Leucine, and Isoleucine Metabolism |
| LEUabcpp  | L-leucine transport via ABC system (periplasm)                         | (VBICanLib238577_0879)                                                                                                                                                                                                                                                                                                                                      | Transport                                  |
| LYSTRS    | Lysyl-tRNA synthetase                                                  | (VBICanLib238577_1044)                                                                                                                                                                                                                                                                                                                                      | Lysine Biosynthesis                        |
| LYSabcpp  | L-lysine transport via ABC system (periplasm)                          | (VBICanLib238577_1180)                                                                                                                                                                                                                                                                                                                                      | Lysine Metabolism                          |
| MACPD     | Malonyl-ACP decarboxylase                                              | (VBICanLib238577_0042)                                                                                                                                                                                                                                                                                                                                      | Fatty Acid Biosynthesis                    |
| MALt2_2pp | Malate transport via proton symport (2 H) (periplasm)                  | (VBICanLib238577_0277)                                                                                                                                                                                                                                                                                                                                      | Transport                                  |
| MSO3abcpp | Methanesulfonate transport via ABC system (periplasm)                  | (VBICanLib238577_0628)                                                                                                                                                                                                                                                                                                                                      | Transport                                  |
| MTHFC     | Methenyltetrahydrofolate cyclohydrolase                                | (VBICanLib238577_0719)                                                                                                                                                                                                                                                                                                                                      | One Carbon pool by folate                  |
| MTHFD     | Methylenetetrahydrofolate dehydrogenase (NADP)                         | (VBICanLib238577_0719)                                                                                                                                                                                                                                                                                                                                      | One Carbon pool by folate                  |
| MHPGLUT   | 5 methyltetrahydropteroyltriglutamate homocysteine S methyltransferase | (VBICanLib238577_1007)                                                                                                                                                                                                                                                                                                                                      | Methionine Metabolism                      |
|           |                                                                        | (VBICanLib238577_0754 and VBICanLib238577_0755 and VBICanLib238577_0756 and VBICanLib238577_0757 and VBICanLib238577_0758 and VBICanLib238577_0759 and VBICanLib238577_0760 and VBICanLib238577_0761 and VBICanLib238577_0762 and VBICanLib238577_0763 and VBICanLib238577_0764 and VBICanLib238577_0765 and VBICanLib238577_0766 and VBICanLib238577_0767) |                                            |
| NADH16pp  | NADH dehydrogenase (ubiquinone-8 & 3 protons) (periplasm)              | (VBICanLib238577_0470)                                                                                                                                                                                                                                                                                                                                      | Oxidative Phosphorylation                  |
| NADK      | NAD kinase                                                             | (VBICanLib238577_0470)                                                                                                                                                                                                                                                                                                                                      | Nicotinate and Nicotinamide                |
| NDPK1     | Nucleoside-diphosphate kinase (ATP:GDP)                                | (VBICanLib238577_0279)                                                                                                                                                                                                                                                                                                                                      | Purine Metabolism                          |
| NDPK2     | Nucleoside-diphosphate kinase (ATP:UDP)                                | (VBICanLib238577_0279)                                                                                                                                                                                                                                                                                                                                      | Pyrimidine Metabolism                      |

|          |                                                                              |                                                  |                                            |
|----------|------------------------------------------------------------------------------|--------------------------------------------------|--------------------------------------------|
| NDPK3    | Nucleoside-diphosphate kinase (ATP:CDP)                                      | (VBICanLib238577_0279)                           | Pyrimidine Metabolism                      |
| NDPK4    | Nucleoside-diphosphate kinase (ATP:dTDP)                                     | (VBICanLib238577_0279)                           | Pyrimidine Metabolism                      |
| NDPK5    | Nucleoside-diphosphate kinase (ATP:dGDP)                                     | (VBICanLib238577_0279)                           | Purine Metabolism                          |
| NDPK6    | Nucleoside-diphosphate kinase (ATP:dUDP)                                     | (VBICanLib238577_0279)                           | Pyrimidine Metabolism                      |
| NDPK7    | Nucleoside-diphosphate kinase (ATP:dCDP)                                     | (VBICanLib238577_0279)                           | Pyrimidine Metabolism                      |
| NDPK8    | Nucleoside-diphosphate kinase (ATP:dADP)                                     | (VBICanLib238577_0279)                           | Purine Metabolism                          |
| NNATr    | Nicotinate-nucleotide adenylyltransferase                                    | (VBICanLib238577_0574)                           | Nicotinate and Nicotinamide                |
| NO2t2rpp | Nitrite transport in via proton symport, reversible (periplasm)              | (VBICanLib238577_0908)                           | Transport                                  |
| OIVD1r   | 2-oxoisovalerate dehydrogenase (acylating; 4-methyl-2-oxopentanoate)         | (VBICanLib238577_0973)                           | Valine, leucine and isoleucine degradation |
| OIVD2    | 2-oxoisovalerate dehydrogenase (acylating; 3-methyl-2-oxobutanoate)          | (VBICanLib238577_0973)                           | Valine, leucine and isoleucine degradation |
| OIVD3    | 2-oxoisovalerate dehydrogenase (acylating; 3-methyl-2-oxopentanoate)         | (VBICanLib238577_0973) or (VBICanLib238577_1196) | Valine, leucine and isoleucine degradation |
| ORNCD    | Ornithine cyclodeaminase                                                     | (VBICanLib238577_0962)                           | Arginine and Proline Metabolism            |
| ORNabcpp | Ornithine transport via ABC system (periplasm)                               | (VBICanLib238577_0042)                           | Lysine Metabolism                          |
| ORPT     | Orotate phosphoribosyltransferase                                            | (VBICanLib238577_0936)                           | Pyrimidine Metabolism                      |
| PANTS    | Pantothenate synthase                                                        | (VBICanLib238577_0603)                           | Pantothenate and CoA Biosynthesis          |
| PAPPT3   | Phospho-N-acetylmuramoyl-pentapeptide-transferase (meso-2,6-diaminopimelate) | (VBICanLib238577_1025)                           | Peptidoglycan Biosynthesis                 |
| PDH      | Pyruvate dehydrogenase                                                       | (VBICanLib238577_0546)                           | Glycolysis                                 |
| PDX5POi  | Pyridoxine 5-phosphate oxidase                                               | (VBICanLib238577_0880)                           | Vitamin B6 Metabolism                      |
| PGM      | Phosphoglycerate mutase                                                      | (VBICanLib238577_0158)                           | Gluconeogenesis                            |
| PGMT     | Phosphoglucomutase                                                           | (VBICanLib238577_1032)                           | Glycolysis                                 |

|           |                                                        |                                                                                                                                                         |                                                |
|-----------|--------------------------------------------------------|---------------------------------------------------------------------------------------------------------------------------------------------------------|------------------------------------------------|
| PIuabcpp  | Phosphate transport via ABC system (uptake, periplasm) | (VBICanLib238577_0519)                                                                                                                                  | Transport                                      |
| PMDPHT    | Pyrimidine phosphatase                                 | (VBICanLib238577_0034)                                                                                                                                  | Riboflavin Metabolism                          |
| PNTK      | Pantothenate kinase                                    | (VBICanLib238577_0391)                                                                                                                                  | Pantothenate and CoA Biosynthesis              |
| PPA       | Inorganic diphosphatase                                | (VBICanLib238577_0108)                                                                                                                                  | Oxidative Phosphorylation                      |
| PPBNGS    | Porphobilinogen synthase                               | (VBICanLib238577_0520)                                                                                                                                  | Porphyrin and Chlorophyll Metabolism           |
| PPPGO     | Protoporphyrinogen oxidase (aerobic)                   | (VBICanLib238577_0996)                                                                                                                                  | Porphyrin and Chlorophyll Metabolism           |
| PRAGSr    | Phosphoribosylglycinamide synthase                     | ((VBICanLib238577_0108)                                                                                                                                 | Purine Metabolism                              |
| PRAIi     | Phosphoribosylanthranilate isomerase (irreversible)    | (VBICanLib238577_0003)                                                                                                                                  | Phenylalanine Tyrosine Tryptophan Biosynthesis |
| PRAIS     | Phosphoribosylaminoimidazole synthase                  | (VBICanLib238577_0885)                                                                                                                                  | Purine Metabolism                              |
| PRFGS     | Phosphoribosylformylglycinamide synthase               | (VBICanLib238577_0882)                                                                                                                                  | Purine Metabolism                              |
| PROTRS    | Prolyl-tRNA synthetase                                 | (VBICanLib238577_0771)                                                                                                                                  | Arginine and Proline Metabolism                |
| PROabcpp  | L-proline transport via ABC system (periplasm)         | (VBICanLib238577_1180)                                                                                                                                  | Arginine and Proline Metabolism                |
| PRPPS     | Phosphoribosylpyrophosphate synthetase                 | (VBICanLib238577_0299)                                                                                                                                  | Ribose Metabolism                              |
| PSP_L     | Phosphoserine phosphatase (L-serine)                   | (VBICanLib238577_0870)                                                                                                                                  | Glycine, Serine and threonine metabolism       |
| PTRCabcpp | Putrescine transport via ABC system (periplasm)        | (VBICanLib238577_0667) or (VBICanLib238577_0629) or (VBICanLib238577_0227)                                                                              | Transport                                      |
| RIBabcpp  | D-ribose transport via ABC system (periplasm)          | (VBICanLib238577_0667) or (VBICanLib238577_0629)                                                                                                        | Transport                                      |
| RNDR4     | Ribonucleoside-diphosphate reductase (UDP)             | (VBICanLib238577_0723 and VBICanLib238577_0059) or (VBICanLib238577_0749) or (VBICanLib238577_0876) or (VBICanLib238577_0930) or (VBICanLib238577_1220) | Pyrimidine Metabolism                          |
| RPE       | Ribulose 5-phosphate 3-epimerase                       | (VBICanLib238577_0227)) or ((VBICanLib238577_0667)                                                                                                      | Pentose Phosphate Pathway                      |
| RPI       | Ribose-5-phosphate isomerase                           | (VBICanLib238577_0976)                                                                                                                                  | Pentose Phosphate Pathway                      |
| SDPTA     | Succinyldiaminopimelate transaminase                   | (VBICanLib238577_0832)                                                                                                                                  | Lysine Biosynthesis                            |
| SERAT     | Serine O-acetyltransferase                             | (VBICanLib238577_0540)                                                                                                                                  | Cysteine Metabolism                            |
| SERTRS    | Seryl-tRNA synthetase                                  | (VBICanLib238577_0542)                                                                                                                                  | Glycine, Serine and threonine metabolism       |

|               |                                                                                                       |                                                                                                                                                           |                                                |
|---------------|-------------------------------------------------------------------------------------------------------|-----------------------------------------------------------------------------------------------------------------------------------------------------------|------------------------------------------------|
| SHCHF         | Sirohydrochlorin ferrochelatase                                                                       | (VBICanLib238577_0613)                                                                                                                                    | Porphyrin and Chlorophyll Metabolism           |
| SOTA          | Succinylornithine transaminase                                                                        | (VBICanLib238577_0542)                                                                                                                                    | Arginine and Proline Metabolism                |
| SPMDabcpp     | Spermidine transport via ABC system (periplasm)                                                       | (VBICanLib238577_0290)                                                                                                                                    | Transport                                      |
| SUCD1         | Succinate dehydrogenase                                                                               | (VBICanLib238577_0965 and VBICanLib238577_0966 and VBICanLib238577_0964)                                                                                  | TCA Cycle                                      |
| SUCDi         | Succinate dehydrogenase (irreversible)                                                                | (VBICanLib238577_0965 and VBICanLib238577_0966 and VBICanLib238577_0964)                                                                                  | TCA Cycle                                      |
| SULR          | Sulfite reductase (NADPH2)                                                                            | (VBICanLib238577_0872)                                                                                                                                    | Sulfur Metabolism                              |
| SULabcpp      | Sulfate transport via ABC system (periplasm)                                                          | (VBICanLib238577_0797)                                                                                                                                    | Sulfur Metabolism                              |
| TRPS3         | Tryptophan synthase (indoleglycerol phosphate)                                                        | (VBICanLib238577_0507)                                                                                                                                    | Phenylalanine Tyrosine Tryptophan Biosynthesis |
| TRSARr        | Tartronate semialdehyde reductase                                                                     | (VBICanLib238577_0667) or (VBICanLib238577_0227)                                                                                                          | Glycolate metabolism                           |
| UAMAS         | UDP-N-acetylmuramoyl-L-alanine synthetase                                                             | (VBICanLib238577_0632)                                                                                                                                    | Glutamate metabolism                           |
| UGMDDS        | UDP-N-acetylmuramoyl-L-alanyl-D-glutamyl-meso-2,6-diaminopimeloyl-D-alanyl-D-alanine synthetase       | (VBICanLib238577_0444)                                                                                                                                    | Peptidoglycan Biosynthesis                     |
| UPPN          | B-ureidopropionase                                                                                    | (VBICanLib238577_0787)                                                                                                                                    | Pantothenate and CoA Biosynthesis              |
| VANKpp        | VANKpp                                                                                                | (VBICanLib238577_0879)                                                                                                                                    | Transport                                      |
| VANLNtex      | VANLNtex                                                                                              | (VBICanLib238577_0879)                                                                                                                                    | Transport                                      |
| VANLTtex      | VANLTtex                                                                                              | (VBICanLib238577_0879)                                                                                                                                    | Transport                                      |
| VNLNpp        | VNLNpp                                                                                                | (VBICanLib238577_0879)                                                                                                                                    | Transport                                      |
| pentso3abcpp  | Pentso3abcpp                                                                                          | (VBICanLib238577_0629)                                                                                                                                    | Transport                                      |
| ACOLIPAabctex | Arabinose modified core oligosaccharide lipid A transport via ABC system (periplasm to extracellular) | ((VBICanLib238577_0282 and VBICanLib238577_0481) or (VBICanLib238577_0689) or (VBICanLib238577_0667) or (VBICanLib238577_0002) or (VBICanLib238577_0520)) | Lipopolysaccharide Biosynthesis / Recycling    |
| ALATA_D2      | D-alanine transaminase                                                                                | ((VBICanLib238577_0237) or (VBICanLib238577_0985))                                                                                                        | Cofactor and Prosthetic Group Biosynthesis     |

|                  |                                                                                                                        |                                                                                                                               |                                             |
|------------------|------------------------------------------------------------------------------------------------------------------------|-------------------------------------------------------------------------------------------------------------------------------|---------------------------------------------|
| ALATA_L2         | Alanine transaminase                                                                                                   | ((VBICanLib238577_0237) or (VBICanLib238577_0985))                                                                            | Cofactor and Prosthetic Group Biosynthesis  |
| AMPTASECG        | Alanyl aminopeptidase (cys-gly)                                                                                        | (VBICanLib238577_0281)                                                                                                        | Cysteine Metabolism                         |
| AMPTASEPG        | Aminopeptidase (pro-gly)                                                                                               | (VBICanLib238577_0985) or (VBICanLib238577_1016)                                                                              | Arginine and Proline Metabolism             |
| ASCBptspp        | L-ascorbate transport via PEP:Pyr PTS (periplasm)                                                                      | (VBICanLib238577_1100)                                                                                                        | Transport, Inner Membrane                   |
| BUTSO3abcpp      | Butanesulfonate transport via ABC system (periplasm)                                                                   | (VBICanLib238577_0629 and VBICanLib238577_0628 and VBICanLib238577_0228)                                                      | Transport, Inner Membrane                   |
| CLIPAabctex      | Cold lipid A transport via ABC system (periplasm to extracellular)                                                     | (VBICanLib238577_0282 and VBICanLib238577_0481) or (VBICanLib238577_0689)                                                     | Lipopolysaccharide Biosynthesis / Recycling |
| COLIPAPabctex    | Core oligosaccharide lipid A diphosphate transport via ABC system (periplasm to extracellular)                         | (VBICanLib238577_0282 and VBICanLib238577_0481)                                                                               | Lipopolysaccharide Biosynthesis / Recycling |
| COLIPAabctex     | Core oligosaccharide lipid A transport via ABC system (periplasm to extracellular)                                     | (VBICanLib238577_0282 and VBICanLib238577_0481)                                                                               | Lipopolysaccharide Biosynthesis / Recycling |
| CRNDabcpp        | D-carnitine transport via ABC system (periplasm)                                                                       | (VBICanLib238577_0228 and VBICanLib238577_0227) or (VBICanLib238577_0520) or (VBICanLib238577_0629) or (VBICanLib238577_0667) | Transport, Inner Membrane                   |
| CYSSADS          | L-cysteine sulfinic acid desulfurase                                                                                   | (VBICanLib238577_1016) or (VBICanLib238577_0985)                                                                              | Cysteine Metabolism                         |
| ECA4COLIPAabctex | Enterobacterial common antigen (x4) core oligosaccharide lipid A transport via ABC system (periplasm to extracellular) | (VBICanLib238577_0480 and VBICanLib238577_0496 and VBICanLib238577_0481 and VBICanLib238577_0282)                             | Lipopolysaccharide Biosynthesis / Recycling |
| ENLIPAabctex     | Phosphoethanolamine lipid A transport via ABC system (periplasm to extracellular)                                      | (VBICanLib238577_0481 and VBICanLib238577_0282 and VBICanLib238577_0480)                                                      | Lipopolysaccharide Biosynthesis / Recycling |
| GRXR             | Glutaredoxin reductase                                                                                                 | (VBICanLib238577_0880)                                                                                                        | Unassigned                                  |
| K2L4Aabctex      | KDO(2)-lipid IV A transport via ABC system (periplasm to extracellular)                                                | (VBICanLib238577_0822)                                                                                                        | Lipopolysaccharide Biosynthesis / Recycling |
| KAS15            | Beta-ketoacyl-ACP synthase (2)                                                                                         | (VBICanLib238577_0694)                                                                                                        | Membrane Lipid Metabolism                   |

|            |                                                                    |                                                                                                                                                                                                                                                                                                              |                                             |
|------------|--------------------------------------------------------------------|--------------------------------------------------------------------------------------------------------------------------------------------------------------------------------------------------------------------------------------------------------------------------------------------------------------|---------------------------------------------|
| KDOPS      | 3-deoxy -D-manno-octulosonic -acid 8-phosphate synthase            | (VBICanLib238577_0553)                                                                                                                                                                                                                                                                                       | Lipopolysaccharide Biosynthesis / Recycling |
| LIPAabctex | Lipid A transport via ABC system (periplasm to extracellular)      | (VBICanLib238577_0822)                                                                                                                                                                                                                                                                                       | Lipopolysaccharide Biosynthesis / Recycling |
|            |                                                                    | (VBICanLib238577_0754 and VBICanLib238577_0755 and VBICanLib238577_0756 and VBICanLib238577_0757 and VBICanLib238577_0758 and VBICanLib238577_0759 and VBICanLib238577_0760 and VBICanLib238577_0761 and VBICanLib238577_0762 and VBICanLib238577_0763 and VBICanLib238577_0764 and VBICanLib238577_0765 and |                                             |
| NADH17pp   | NADH dehydrogenase (menaquinone-8 & 3 protons) (periplasm)         | VBICanLib238577_0766 and VBICanLib238577_0767)                                                                                                                                                                                                                                                               | Oxidative Phosphorylation                   |
|            |                                                                    | (VBICanLib238577_0754 and VBICanLib238577_0755 and VBICanLib238577_0756 and VBICanLib238577_0757 and VBICanLib238577_0758 and VBICanLib238577_0759 and VBICanLib238577_0760 and VBICanLib238577_0761 and VBICanLib238577_0762 and VBICanLib238577_0763 and VBICanLib238577_0764 and VBICanLib238577_0765 and |                                             |
| NADH18pp   | NADH dehydrogenase (demethylmenaquinone-8 & 3 protons) (periplasm) | VBICanLib238577_0766 and VBICanLib238577_0767)                                                                                                                                                                                                                                                               | Oxidative Phosphorylation                   |
| NADHHR     | NADH hydratase                                                     | (VBICanLib238577_0569)                                                                                                                                                                                                                                                                                       | Metabolite Repair                           |
| NADHHS     | NADH hydratase                                                     | (VBICanLib238577_0569)                                                                                                                                                                                                                                                                                       | Metabolite Repair                           |
| NADPHHR    | NADPH hydratase                                                    | (VBICanLib238577_0569)                                                                                                                                                                                                                                                                                       | Metabolite Repair                           |
| NADPHHS    | NADPH hydratase                                                    | (VBICanLib238577_0569)                                                                                                                                                                                                                                                                                       | Metabolite Repair                           |



|               |                                                                                                     |                                                                                                   |                                             |
|---------------|-----------------------------------------------------------------------------------------------------|---------------------------------------------------------------------------------------------------|---------------------------------------------|
| O16A4COLIPAab | O16 antigen (x4) core oligosaccharide lipid A transport via ABC system (periplasm to extracellular) | (VBICanLib238577_0479 and VBICanLib238577_0480 and VBICanLib238577_0481)                          | Lipopolysaccharide Biosynthesis / Recycling |
| OCTDPS        | Octaprenyl pyrophosphate synthase                                                                   | (VBICanLib238577_0279))                                                                           | Cofactor and Prosthetic Group Biosynthesis  |
| OMBZLM        | 2-Octaprenyl-6-methoxy-benzoquinol methylase                                                        | (VBICanLib238577_0279))                                                                           | Cofactor and Prosthetic Group Biosynthesis  |
| RNDR4b        | Ribonucleoside-diphosphate reductase (UDP) (glutaredoxin)                                           | (VBICanLib238577_0457)                                                                            | Nucleotide Salvage Pathway                  |
| S2FE2SR       | SUF [2Fe-2S] regeneration                                                                           | (VBICanLib238577_0918 and VBICanLib238577_0985 and VBICanLib238577_0984 and VBICanLib238577_0983) | Cofactor and Prosthetic Group Biosynthesis  |
| S2FE2SS       | SUF [2Fe-2S] Synthesis                                                                              | (VBICanLib238577_0918 and VBICanLib238577_0985 and VBICanLib238577_0984 and VBICanLib238577_0983) | Cofactor and Prosthetic Group Biosynthesis  |
| S2FE2SS2      | SUF [2Fe-2S] Synthesis II                                                                           | (VBICanLib238577_0918 and VBICanLib238577_0985 and VBICanLib238577_0984 and VBICanLib238577_0983) | Cofactor and Prosthetic Group Biosynthesis  |
| S2FE2ST       | SUF [2Fe-2S] Transfer                                                                               | (VBICanLib238577_0918 and VBICanLib238577_0985 and VBICanLib238577_0984 and VBICanLib238577_0983) | Cofactor and Prosthetic Group Biosynthesis  |
| S4FE4SR       | SUF [4Fe-4S] Reduction                                                                              | (VBICanLib238577_0918 and VBICanLib238577_0985 and VBICanLib238577_0984 and VBICanLib238577_0983) | Cofactor and Prosthetic Group Biosynthesis  |
| S4FE4ST       | SUF [4Fe-4S] Transfer                                                                               | (VBICanLib238577_0983)                                                                            | Cofactor and Prosthetic Group Biosynthesis  |
| SCYSDS        | SUF Cysteine desulfuration                                                                          | (VBICanLib238577_0985)                                                                            | Cofactor and Prosthetic Group Biosynthesis  |
| FEex          | Iron transporter                                                                                    | (VBICanLib238577_0822 and VBICanLib238577_0649) or (VBICanLib238577_0065)                         | iron metabolism                             |

|          |                                                                       |                                                                                                                                                             |                                                |
|----------|-----------------------------------------------------------------------|-------------------------------------------------------------------------------------------------------------------------------------------------------------|------------------------------------------------|
| FEpp     | Iron transporter                                                      | (VBICanLib238577_0649 and VBICanLib238577_0822)                                                                                                             | iron metabolism                                |
|          |                                                                       | ((VBICanLib238577_0723) and (VBICanLib238577_0059)) or (VBICanLib238577_0749) or (VBICanLib238577_0876) or (VBICanLib238577_0930) or (VBICanLib238577_1220) |                                                |
| RNDR3b   | Ribonucleoside-diphosphate reductase (CDP) (glutaredoxin)             | (Ishi_364)                                                                                                                                                  | Nucleotide Salvage Pathway                     |
| 4HTHRS   | 4-Hydroxy-L-threonine synthase                                        | ((Ishi_405) and (Ishi_147) and (Ishi_646) and (Ishi_148))                                                                                                   | Vitamin B6 Metabolism                          |
| ACCOAC   | Acetyl-CoA carboxylase                                                | ((Ishi_148) and (Ishi_405) and (Ishi_646) and (Ishi_147))                                                                                                   | Fatty Acid Biosynthesis                        |
| ACGK     | Acetylglutamate kinase                                                | (Ishi_384)                                                                                                                                                  | Urea cycle/amino group metabolism              |
| ACGS     | N-acetylglutamate synthase                                            | ((Ishi_425) and (Ishi_972)) and (Ishi_845))                                                                                                                 | Urea cycle/amino group metabolism              |
| ACHBS    | 2-aceto-2-hydroxybutanoate synthase                                   | (Ishi_738)                                                                                                                                                  | Valine, Leucine, and Isoleucine Metabolism     |
| ACOATA   | Acetyl-CoA ACP transacylase                                           | (Ishi_349)                                                                                                                                                  | Fatty Acid Biosynthesis                        |
| ACONT    | Aconitate hydratase                                                   | ((Ishi_349)                                                                                                                                                 | TCA Cycle                                      |
| ACONTa   | Aconitase (half-reaction A, Citrate hydro-lyase)                      | (Ishi_349)                                                                                                                                                  | TCA Cycle                                      |
| ACONTb   | Aconitase (half-reaction B, Isocitrate hydro-lyase)                   | (Ishi_349)                                                                                                                                                  | TCA Cycle                                      |
| ACOTA    | Acetylornithine transaminase                                          | (Ishi_349)                                                                                                                                                  | Urea cycle/amino group metabolism              |
| ACt2rpp  | Acetate reversible transport via proton symport (periplasm)           | ((Ishi_349)                                                                                                                                                 | Transport                                      |
| ADSL1r   | Adenylosuccinate lyase                                                | (Ishi_897)                                                                                                                                                  | Purine Metabolism                              |
| ADSL2r   | Adenylosuccinate lyase                                                | (Ishi_897)                                                                                                                                                  | Purine Metabolism                              |
| AGPAT160 | 1-hexadecanoyl-sn-glycerol 3-phosphate O-acyltransferase (n-C16:0)    | (Ishi_654)                                                                                                                                                  | Glycerophospholipid Metabolism                 |
| AGPAT161 | 1-hexadec-7-enoyl-sn-glycerol 3-phosphate O-acyltransferase (n-C16:1) | (Ishi_654)                                                                                                                                                  | Glycerophospholipid Metabolism                 |
| AKGDH    | 2-Oxoglutarate dehydrogenase                                          | (Ishi_982) and (Ishi_983))                                                                                                                                  | TCA Cycle                                      |
| ALAALAr  | D-alanine-D-alanine ligase (reversible)                               | (Ishi_1117))                                                                                                                                                | Peptidoglycan Biosynthesis                     |
| ANPRT    | Anthranilate phosphoribosyltransferase                                | (Ishi_308)                                                                                                                                                  | Phenylalanine Tyrosine Tryptophan Biosynthesis |
| ANS      | Anthranilate synthase                                                 | (Ishi_308) or (Ishi_316)                                                                                                                                    | Phenylalanine Tyrosine Tryptophan Biosynthesis |
| ARGSS    | Argininosuccinate synthase                                            | (Ishi_113)                                                                                                                                                  | Arginine and Proline Metabolism                |

|            |                                                        |                                                                                        |                                                |
|------------|--------------------------------------------------------|----------------------------------------------------------------------------------------|------------------------------------------------|
| ARGabcpp   | L-arginine transport via ABC system (periplasm)        | (Ishi_47) or (Ishi_47)                                                                 | Transport                                      |
| ASAD       | Aspartate-semialdehyde dehydrogenase                   | (Ishi_191)                                                                             | Lysine Biosynthesis                            |
| ASPabcpp   | L-aspartate transport via ABC system (periplasm)       | ((Ishi_46) and (Ishi_45) and (Ishi_1045)) or ((Ishi_263))                              | Transport                                      |
| ATPPRT     | ATP phosphoribosyltransferase                          | (Ishi_786)                                                                             | Histidine Metabolism                           |
| ATPS4rpp   | ATP synthase (four protons for one ATP) (periplasm)    | ((Ishi_1046) and (Ishi_1046)) or ((Ishi_46) and (Ishi_45) and (Ishi_44) and (Ishi_47)) | Oxidative Phosphorylation                      |
| BZt1pp     | Benzoate transport in via proton symport (periplasm)   | (Ishi_280)                                                                             | B-Ketoadipate pathway                          |
| CHLabcpp   | Choline transport via ABC system (periplasm)           | (Ishi_230)) or (Ishi_47) or ((Ishi_525) and (Ishi_231)                                 | Transport                                      |
| DAPE       | Diaminopimelate epimerase                              | (Ishi_518))                                                                            | Lysine Biosynthesis                            |
| CHOLSabc   | CHOLSabc                                               | ((Ishi_232) or (Ishi_230)) or (Ishi_525) or (Ishi_638) or (Ishi_677)                   | Glycine, Serine and threonine metabolism       |
| COBALT2tpp | Cobalt transport in via permease (no H <sup>+</sup> )  | (Ishi_158)                                                                             | Transport                                      |
| CS         | Citrate synthase                                       | ((Ishi_230) and (Ishi_231)                                                             | TCA Cycle                                      |
| CTPS2      | CTP synthase (glutamine)                               | ((Ishi_230) and (Ishi_231)                                                             | Pyrimidine Metabolism                          |
| CYO1b      | CYO1b                                                  | ((Ishi_373) and (Ishi_374))                                                            | Oxidative Phosphorylation                      |
| CYSabcpp   | L-cysteine uptake via ABC system (periplasm)           | (Ishi_658)) or (Ishi_69) or ((Ishi_834) and (Ishi_658)) or (Ishi_69) or ((Ishi_834)    | Transport                                      |
| DAPDC      | Diaminopimelate decarboxylase                          | (Ishi_264)                                                                             | Lysine Biosynthesis                            |
| DASYN160   | CDP-diacylglycerol synthetase (n-C16:0)                | (Ishi_452)                                                                             | Glycerophospholipid Metabolism                 |
| DASYN161   | CDP-diacylglycerol synthetase (n-C16:1)                | (Ishi_452)                                                                             | Glycerophospholipid Metabolism                 |
| DB4PS      | 3,4-Dihydroxy-2-butanone-4-phosphate synthase          | (Ishi_252)                                                                             | Riboflavin Metabolism                          |
| DDPA       | 3-deoxy-D-arabino-heptulosonate 7-phosphate synthetase | (Ishi_560)                                                                             | Phenylalanine Tyrosine Tryptophan Biosynthesis |
| DHFR       | Dihydrofolate reductase                                | (Ishi_878)                                                                             | One Carbon pool by folate                      |
| DHORTS     | Dihydroorotase                                         | (Ishi_947)                                                                             | Pyrimidine Metabolism                          |
| DMATT      | Dimethylallyltranstransferase                          | (Ishi_1044)                                                                            | Steroid biosynthesis                           |
| DNTPPA     | Dihydroneopterin triphosphate pyrophosphatase          | (Ishi_211)                                                                             | Folate Biosynthesis                            |

|             |                                                          |                                                             |                                   |
|-------------|----------------------------------------------------------|-------------------------------------------------------------|-----------------------------------|
| DPCOAK      | Dephospho-CoA kinase                                     | (Ishi_407)                                                  | Pantothenate and CoA Biosynthesis |
| DPR         | 2-dehydropantoate 2-reductase                            | (Ishi_1032)                                                 | Pantothenate and CoA Biosynthesis |
| DTMPK       | DTMP kinase                                              | (Ishi_96)                                                   | Pyrimidine Metabolism             |
| DXPS        | 1-deoxy-D-xylulose 5-phosphate synthase                  | (Ishi_555)                                                  | Steroid biosynthesis              |
| E4PD        | Erythrose 4-phosphate dehydrogenase                      | ((Ishi_1046) and (Ishi_47)) or ((Ishi_525) and (Ishi_1045)) | Vitamin B6 Metabolism             |
| EAR100y     | Enoyl-[acyl-carrier-protein] reductase (NADPH) (n-C10:0) | (Ishi_47)                                                   | Fatty Acid Biosynthesis           |
| EAR120y     | Enoyl-[acyl-carrier-protein] reductase (NADPH) (n-C12:0) | ((Ishi_230) and (Ishi_231))                                 | Fatty Acid Biosynthesis           |
| EAR121y     | Enoyl-[acyl-carrier-protein] reductase (NADPH) (n-C12:1) | (Ishi_230) and (Ishi_231))                                  | Fatty Acid Biosynthesis           |
| EAR160y     | Enoyl-[acyl-carrier-protein] reductase (NADPH) (n-C16:0) | ((Ishi_230) and (Ishi_231))                                 | Fatty Acid Biosynthesis           |
| EAR161y     | Enoyl-[acyl-carrier-protein] reductase (NADPH) (n-C16:1) | (Ishi_47))                                                  | Fatty Acid Biosynthesis           |
| EAR180y     | Enoyl-[acyl-carrier-protein] reductase (NADPH) (n-C18:0) | (Ishi_891)                                                  | Fatty Acid Biosynthesis           |
| EAR181y     | Enoyl-[acyl-carrier-protein] reductase (NADPH) (n-C18:1) | (Ishi_638)                                                  | Fatty Acid Biosynthesis           |
| EAR40y      | Enoyl-[acyl-carrier-protein] reductase (NADPH) (n-C4:0)  | ((Ishi_231) and (Ishi_230))                                 | Fatty Acid Biosynthesis           |
| EAR60y      | Enoyl-[acyl-carrier-protein] reductase (NADPH) (n-C6:0)  | (Ishi_1105) or (Ishi_361)                                   | Fatty Acid Biosynthesis           |
| EAR80y      | Enoyl-[acyl-carrier-protein] reductase (NADPH) (n-C8:0)  | ((Ishi_525)                                                 | Fatty Acid Biosynthesis           |
| ENO         | Enolase                                                  | ((Ishi_372) and (Ishi_371) and (Ishi_374) and (Ishi_373))   | Gluconeogenesis                   |
| ETHSO3abcpp | Ethanesulfonate transport via ABC system (periplasm)     | ((Ishi_638) and (Ishi_637) and (Ishi_770))                  | Transport                         |
| FDH         | Formate dehydrogenase                                    | (Ishi_770) and (Ishi_769)                                   | Methane Metabolism                |
| FE2abc      | Iron (II) transport via ABC system                       | (Ishi_230) or ((Ishi_677)                                   | Transport                         |
| FTHFD       | Formyltetrahydrofolate deformylase                       | (Ishi_827) or (Ishi_666)                                    | One Carbon pool by folate         |
| FUM         | Fumarase                                                 | (Ishi_577) or ((Ishi_578) or (Ishi_577)) or (Ishi_578)      | TCA Cycle                         |

|             |                                                                   |                                                                                        |                                                |
|-------------|-------------------------------------------------------------------|----------------------------------------------------------------------------------------|------------------------------------------------|
| FUMtex      | Fumarate transport via diffusion<br>(extracellular to periplasm)  | (Ishi_547)                                                                             | Transport                                      |
| GLCabcpp    | D-glucose transport via ABC system<br>(periplasm)                 | (Ishi_65)                                                                              | Transport                                      |
| GLNS        | Glutamine synthetase                                              | (Ishi_47)) or (Ishi_638)                                                               | Glutamate Metabolism                           |
| GLNTRAT     | Glutamyl-tRNA(Gln) amidotransferase                               | ((Ishi_902) and (Ishi_904) and (Ishi_903))                                             | Glutamate Metabolism                           |
| GLUSy       | Glutamate synthase (NADPH)                                        | (Ishi_164)                                                                             | Glutamate Metabolism                           |
| GLYBabcpp   | Glycine betaine transport via ABC system<br>(periplasm)           | ((Ishi_280)<br>(Ishi_553)) or (Ishi_984) or (Ishi_986) or (Ishi_553))                  | Arginine and Proline Metabolism                |
| GLYCL       | Glycine Cleavage System                                           | or (Ishi_984) or ((Ishi_986)                                                           | Glycine, Serine and threonine metabolism       |
| GLYCLTr2rpp | Glycolate transport via proton symport,<br>reversible (periplasm) | (Ishi_1030) and (Ishi_553)) or (Ishi_984) or<br>(Ishi_986)                             | Transport                                      |
| GLYCLTtex   | Glycolate transport via diffusion<br>(extracellular to periplasm) | (Ishi_553)) or (Ishi_984) or (Ishi_986) or (Ishi_553))<br>or (Ishi_984) or ((Ishi_986) | Transport                                      |
| GLYCL_2     | Glycine cleavage system, cytosol                                  | (Ishi_553)) or (Ishi_984) or (Ishi_986) or (Ishi_553))<br>or (Ishi_984) or ((Ishi_986) | Nitrogen Metabolism                            |
| GLYCTO1     | Glycolate oxidase                                                 | ((Ishi_468)                                                                            | Glycolate metabolism                           |
| GLYTRS      | Glycyl-tRNA synthetase                                            | (Ishi_47))                                                                             | Glycine, Serine and threonine metabolism       |
| GMPS2       | GMP synthase                                                      | (Ishi_471))                                                                            | Purine Metabolism                              |
| GND         | Phosphogluconate dehydrogenase                                    | (Ishi_283))                                                                            | Pentose Phosphate Pathway                      |
| GRTT        | Geranyltranstransferase                                           | (Ishi_1044)                                                                            | Steroid biosynthesis                           |
| GTHS        | Glutathione synthetase                                            | (Ishi_891)                                                                             | Glutamate Metabolism                           |
| GTPCII      | GTP cyclohydrolase II                                             | ((Ishi_252) or (Ishi_252))                                                             | Riboflavin Metabolism                          |
| HCO3E       | HCO <sub>3</sub> equilibration reaction                           | (Ishi_567)                                                                             | One Carbon pool by folate                      |
| HEMEOS      | Heme O synthase                                                   | (Ishi_253)                                                                             | Porphyrin and Chlorophyll Metabolism           |
| HEX1        | Hexokinase (D-glucose:ATP)                                        | (Ishi_161)                                                                             | Glycolysis                                     |
| HISabcpp    | L-histidine transport via ABC system<br>(periplasm)               | (Ishi_60)                                                                              | Transport                                      |
| HMBS        | Hydroxymethylbilane synthase                                      | (Ishi_969)                                                                             | Porphyrin and Chlorophyll Metabolism           |
| HSK         | Homoserine kinase                                                 | (Ishi_431)                                                                             | Glycine, Serine and threonine metabolism       |
| Htex        | Proton transport via diffusion<br>(extracellular to periplasm)    | (Ishi_69)                                                                              | Transport                                      |
| IGPS        | Indole-3-glycerol-phosphate synthase                              | (Ishi_10)                                                                              | Phenylalanine Tyrosine Tryptophan Biosynthesis |

|             |                                                                 |                                                       |                                            |
|-------------|-----------------------------------------------------------------|-------------------------------------------------------|--------------------------------------------|
| ILEabcpp    | L-isoleucine transport via ABC system (periplasm)               | (Ishi_810)                                            | Transport                                  |
| IMPC        | IMP cyclohydrolase                                              | (Ishi_1050)                                           | Purine Metabolism                          |
| IMPD        | IMP dehydrogenase                                               | (Ishi_803)                                            | Purine Metabolism                          |
| IPDDI       | Isopentenyl-diphosphate D-isomerase                             | (Ishi_1006)                                           | Steroid biosynthesis                       |
| IPDPS       | 1-hydroxy-2-methyl-2-(E)-butenyl 4-diphosphate reductase (ipdp) | (Ishi_962)                                            | Steroid biosynthesis                       |
| IPMD        | 3-isopropylmalate dehydrogenase                                 | (Ishi_819)                                            | Valine, Leucine, and Isoleucine Metabolism |
| IPPMIa      | 3-isopropylmalate dehydratase                                   | (Ishi_349) or (Ishi_735)                              | Valine, Leucine, and Isoleucine Metabolism |
| IPPMIb      | 2-isopropylmalate hydratase                                     | (Ishi_349) or (Ishi_735)                              | Valine, Leucine, and Isoleucine Metabolism |
| ISETACabcpp | Isethionate transport via ABC system (periplasm)                | (Ishi_638) or (Ishi_230)                              | Transport                                  |
| KAS14       | Beta-ketoacyl-ACP synthase                                      | (Ishi_360)                                            | Fatty Acid Biosynthesis                    |
| LEUTRS      | Leucyl-tRNA synthetase                                          | (Ishi_424)                                            | Valine, Leucine, and Isoleucine Metabolism |
| LEUabcpp    | L-leucine transport via ABC system (periplasm)                  | (Ishi_810)                                            | Transport                                  |
| LYSTRS      | Lysyl-tRNA synthetase                                           | (Ishi_1051)                                           | Lysine Biosynthesis                        |
| LYSabcpp    | L-lysine transport via ABC system (periplasm)                   | ((Ishi_46) and (Ishi_44) and (Ishi_45) and (Ishi_47)) | Lysine Metabolism                          |
| MACPD       | Malonyl-ACP decarboxylase                                       | (Ishi_308)                                            | Fatty Acid Biosynthesis                    |
| MALt2_2pp   | Malate transport via proton symport (2 H) (periplasm)           | (Ishi_986)                                            | Transport                                  |
| MCITS       | 2-methylcitrate synthase                                        | (Ishi_248)                                            | Propanoate Metabolism                      |
| MCOATA      | Malonyl-CoA-ACP transacylase                                    | (Ishi_533)                                            | Fatty Acid Biosynthesis                    |
| ME1         | Malic enzyme (NAD)                                              | (Ishi_7)                                              | Glycolysis                                 |
| METAT       | Methionine adenosyltransferase                                  | ((Ishi_798) or (Ishi_798))                            | Methionine Metabolism                      |
| METabcpp    | L-methionine transport via ABC system (periplasm)               | (Ishi_47)                                             | Transport                                  |
| MICITDr     | 2-methylisocitrate dehydratase                                  | (Ishi_349)                                            | Propanoate Metabolism                      |
| MSO3abcpp   | Methanesulfonate transport via ABC system (periplasm)           | (Ishi_638)                                            | Transport                                  |
| MTHFC       | Methenyltetrahydrofolate cyclohydrolase                         | (Ishi_730)                                            | One Carbon pool by folate                  |
| MTHFD       | Methylenetetrahydrofolate dehydrogenase (NADP)                  | (Ishi_730)                                            | One Carbon pool by folate                  |

|          |                                                                 |                                                                                                                                                                                                               |                             |
|----------|-----------------------------------------------------------------|---------------------------------------------------------------------------------------------------------------------------------------------------------------------------------------------------------------|-----------------------------|
| NADH16pp | NADH dehydrogenase (ubiquinone-8 & 3 protons) (periplasm)       | (Ishi_764) and (Ishi_765) and (Ishi_766) and (Ishi_767) and (Ishi_768) and (Ishi_769) and (Ishi_770) and (Ishi_771) and (Ishi_772) and (Ishi_773) and (Ishi_774) and (Ishi_775) and (Ishi_776) and (Ishi_777) | Oxidative Phosphorylation   |
| NADK     | NAD kinase                                                      | (Ishi_474)                                                                                                                                                                                                    | Nicotinate and Nicotinamide |
| NADS2    | Nicotinate-mononucleotide adenylyltransferase                   | (Ishi_930)                                                                                                                                                                                                    | Nicotinate and Nicotinamide |
| NAMNPP   | Nicotinic acid mononucleotide pyrophosphorylase                 | (Ishi_353)                                                                                                                                                                                                    | Nicotinate and Nicotinamide |
| NAt3_2pp | Sodium proton antiporter (H:NA is 2) (periplasm)                | (Ishi_255)                                                                                                                                                                                                    | Transport                   |
| NDPK1    | Nucleoside-diphosphate kinase (ATP:GDP)                         | (Ishi_283)                                                                                                                                                                                                    | Purine Metabolism           |
| NDPK2    | Nucleoside-diphosphate kinase (ATP:UDP)                         | (Ishi_283)                                                                                                                                                                                                    | Pyrimidine Metabolism       |
| NDPK3    | Nucleoside-diphosphate kinase (ATP:CDP)                         | (Ishi_283)                                                                                                                                                                                                    | Pyrimidine Metabolism       |
| NDPK4    | Nucleoside-diphosphate kinase (ATP:dTDP)                        | (Ishi_283)                                                                                                                                                                                                    | Pyrimidine Metabolism       |
| NDPK5    | Nucleoside-diphosphate kinase (ATP:dGDP)                        | (Ishi_283)                                                                                                                                                                                                    | Purine Metabolism           |
| NDPK6    | Nucleoside-diphosphate kinase (ATP:dUDP)                        | (Ishi_283)                                                                                                                                                                                                    | Pyrimidine Metabolism       |
| NDPK7    | Nucleoside-diphosphate kinase (ATP:dCDP)                        | (Ishi_283)                                                                                                                                                                                                    | Pyrimidine Metabolism       |
| NDPK8    | Nucleoside-diphosphate kinase (ATP:dADP)                        | (Ishi_283)                                                                                                                                                                                                    | Purine Metabolism           |
| NNATr    | Nicotinate-nucleotide adenylyltransferase                       | (Ishi_584)                                                                                                                                                                                                    | Nicotinate and Nicotinamide |
| NO2t2rpp | Nitrite transport in via proton symport, reversible (periplasm) | (Ishi_920)                                                                                                                                                                                                    | Transport                   |
| NTD10    | 5-nucleotidase (XMP)                                            | (Ishi_548)                                                                                                                                                                                                    | Purine Metabolism           |
| NTD11    | 5-nucleotidase (IMP)                                            | (Ishi_548)                                                                                                                                                                                                    | Purine Metabolism           |
| NTD2     | 5-nucleotidase (UMP)                                            | (Ishi_548)                                                                                                                                                                                                    | Pyrimidine Metabolism       |
| NTD3     | 5-nucleotidase (dCMP)                                           | (Ishi_548)                                                                                                                                                                                                    | Pyrimidine Metabolism       |

|            |                                                                              |                                                                                        |                                            |
|------------|------------------------------------------------------------------------------|----------------------------------------------------------------------------------------|--------------------------------------------|
| NTD4       | 5-nucleotidase (CMP)                                                         | (Ishi_548)                                                                             | Pyrimidine Metabolism                      |
| NTD5       | 5-nucleotidase (dTMP)                                                        | (Ishi_548)                                                                             | Pyrimidine Metabolism                      |
| NTD6       | 5-nucleotidase (dAMP)                                                        | (Ishi_548)                                                                             | Purine Metabolism                          |
| NTD7       | 5-nucleotidase (AMP)                                                         | (Ishi_548)                                                                             | Purine Metabolism                          |
| NTD8       | 5-nucleotidase (dGMP)                                                        | (Ishi_548)                                                                             | Purine Metabolism                          |
| NTD9       | 5-nucleotidase (GMP)                                                         | (Ishi_548)                                                                             | Purine Metabolism                          |
| OCBT       | Ornithine carbamoyltransferase                                               | (Ishi_280)                                                                             | Urea cycle/amino group metabolism          |
| OIVD1r     | 2-oxoisovalerate dehydrogenase (acylating; 4-methyl-2-oxopentanoate)         | (Ishi_554) or ((Ishi_983) and (Ishi_553)) or (Ishi_984) or ((Ishi_986) and (Ishi_555)) | Valine, leucine and isoleucine degradation |
| OIVD2      | 2-oxoisovalerate dehydrogenase (acylating; 3-methyl-2-oxobutanoate)          | (Ishi_554) or ((Ishi_983) and (Ishi_553)) or (Ishi_984) or ((Ishi_986) and (Ishi_555)) | Valine, leucine and isoleucine degradation |
| OIVD3      | 2-oxoisovalerate dehydrogenase (acylating; 3-methyl-2-oxopentanoate)         | (Ishi_554) or ((Ishi_983) and (Ishi_553)) or (Ishi_984) or ((Ishi_986) and (Ishi_555)) | Valine, leucine and isoleucine degradation |
| OMPDC      | Orotidine-5-phosphate decarboxylase                                          | (Ishi_351)                                                                             | Pyrimidine Metabolism                      |
| ORNabcpp   | Ornithine transport via ABC system (periplasm)                               | (Ishi_701)                                                                             | Lysine Metabolism                          |
| ORPT       | Orotate phosphoribosyltransferase                                            | (Ishi_946)                                                                             | Pyrimidine Metabolism                      |
| OXOADLR    | OXOADLR                                                                      | (Ishi_983)                                                                             | Lysine Metabolism                          |
| PAPPT3     | Phospho-N-acetylmuramoyl-pentapeptide-transferase (meso-2,6-diaminopimelate) | (Ishi_7)                                                                               | Peptidoglycan Biosynthesis                 |
| PC         | Pyruvate carboxylase                                                         | (Ishi_148)                                                                             | TCA Cycle                                  |
| PDH        | Pyruvate dehydrogenase                                                       | (Ishi_319)                                                                             | Glycolysis                                 |
| PDX5POi    | Pyridoxine 5-phosphate oxidase                                               | (Ishi_1104)                                                                            | Vitamin B6 Metabolism                      |
| PDX5PS     | Pyridoxine 5-phosphate synthase                                              | (Ishi_335) and (Ishi_291)                                                              | Vitamin B6 Metabolism                      |
| PE120abcpp | Phosphatidylethanolamine transport via ABC system (n-C12:0, periplasm)       | (Ishi_658)) or (Ishi_69) or ((Ishi_834)                                                | Glycerophospholipid Metabolism             |
| PE160abcpp | Phosphatidylethanolamine transport via ABC system (n-C16:0, periplasm)       | (Ishi_658)) or (Ishi_69) or ((Ishi_834)                                                | Glycerophospholipid Metabolism             |
| PE161abcpp | Phosphatidylethanolamine transport via ABC system (n-C16:1, periplasm)       | (Ishi_658)) or (Ishi_69) or ((Ishi_834)                                                | Glycerophospholipid Metabolism             |
| PE180abcpp | Phosphatidylethanolamine transport via ABC system (n-C18:0, periplasm)       | (Ishi_658)) or (Ishi_69) or ((Ishi_834)                                                | Glycerophospholipid Metabolism             |
| PE181abcpp | Phosphatidylethanolamine transport via ABC system (n-C18:1, periplasm)       | (Ishi_658)) or (Ishi_69) or ((Ishi_834)                                                | Glycerophospholipid Metabolism             |



|             |                                                                            |                                                       |                                                |
|-------------|----------------------------------------------------------------------------|-------------------------------------------------------|------------------------------------------------|
| PGAMT       | Phosphoglucosamine mutase                                                  | ((Ishi_46) and (Ishi_45) and (Ishi_44) and (Ishi_47)) | Aminosugar Metabolism                          |
| PGL         | 6-phosphogluconolactonase                                                  | (Ishi_349)                                            | Glycolysis                                     |
| PGM         | Phosphoglycerate mutase                                                    | (Ishi_159)                                            | Gluconeogenesis                                |
| PGP120abcpp | Phosphatidylglycerophosphate transport via ABC system (n-C12:0, periplasm) | (Ishi_658)) or (Ishi_69) or ((Ishi_834)               | Glycerophospholipid Metabolism                 |
| PGP160abcpp | Phosphatidylglycerophosphate transport via ABC system (n-C16:0, periplasm) | (Ishi_658)) or (Ishi_69) or ((Ishi_834)               | Glycerophospholipid Metabolism                 |
| PGP161abcpp | Phosphatidylglycerophosphate transport via ABC system (n-C16:1, periplasm) | (Ishi_658)) or (Ishi_69) or ((Ishi_834)               | Glycerophospholipid Metabolism                 |
| PGP180abcpp | Phosphatidylglycerophosphate transport via ABC system (n-C18:0, periplasm) | (Ishi_658)) or (Ishi_69) or ((Ishi_834)               | Glycerophospholipid Metabolism                 |
| PGP181abcpp | Phosphatidylglycerophosphate transport via ABC system (n-C18:1, periplasm) | (Ishi_658)) or (Ishi_69) or ((Ishi_834)               | Glycerophospholipid Metabolism                 |
| PGSA120     | Phosphatidylglycerol synthase (n-C12:0)                                    | (Ishi_634)                                            | Glycerophospholipid Metabolism                 |
| PGSA160     | Phosphatidylglycerol synthase (n-C16:0)                                    | (Ishi_634)                                            | Glycerophospholipid Metabolism                 |
| PGSA161     | Phosphatidylglycerol synthase (n-C16:1)                                    | (Ishi_634)                                            | Glycerophospholipid Metabolism                 |
| PGSA180     | Phosphatidylglycerol synthase (n-C18:0)                                    | (Ishi_634)                                            | Glycerophospholipid Metabolism                 |
| PGSA181     | Phosphatidylglycerol synthase (n-C18:1)                                    | (Ishi_634)                                            | Glycerophospholipid Metabolism                 |
| PHETRS      | Phenylalanyl-tRNA synthetase                                               | ((Ishi_730) or (Ishi_730))                            | Phenylalanine Tyrosine Tryptophan Biosynthesis |
| PIuabcpp    | Phosphate transport via ABC system (uptake, periplasm)                     | ((Ishi_730) or (Ishi_730))                            | Transport                                      |
| PNTK        | Pantothenate kinase                                                        | (Ishi_280)                                            | Pantothenate and CoA Biosynthesis              |
| PPA         | Inorganic diphosphatase                                                    | (Ishi_111)                                            | Oxidative Phosphorylation                      |
| PPBNGS      | Porphobilinogen synthase                                                   | (Ishi_283)                                            | Porphyrin and Chlorophyll Metabolism           |
| PPCDC       | Phosphopantothenoylcysteine decarboxylase                                  | ((Ishi_283) or (Ishi_283))                            | Pantothenate and CoA Biosynthesis              |
| PPNCL       | Phosphopantothenate-cysteine ligase                                        | (Ishi_612)                                            | Pantothenate and CoA Biosynthesis              |
| PRAGSr      | Phosphoribosylglycinamide synthase                                         | ((Ishi_283) or (Ishi_283))                            | Purine Metabolism                              |
| PRAIi       | Phosphoribosylanthranilate isomerase (irreversible)                        | (Ishi_10)                                             | Phenylalanine Tyrosine Tryptophan Biosynthesis |
| PRAIS       | Phosphoribosylaminoimidazole synthase                                      | (Ishi_283)                                            | Purine Metabolism                              |
| PRASCSi     | Phosphoribosylaminoimidazolesuccinocarboxamide synthase                    | (Ishi_896)                                            | Purine Metabolism                              |
| PRFGS       | Phosphoribosylformylglycinamide synthase                                   | (Ishi_893)                                            | Purine Metabolism                              |

|            |                                                 |                                          |                                                |
|------------|-------------------------------------------------|------------------------------------------|------------------------------------------------|
| PROTRS     | Prolyl-tRNA synthetase                          | (Ishi_283)                               | Arginine and Proline Metabolism                |
| PROabcpp   | L-proline transport via ABC system (periplasm)  | (Ishi_283)                               | Arginine and Proline Metabolism                |
| PRPPS      | Phosphoribosylpyrophosphate synthetase          | (Ishi_283)                               | Ribose Metabolism                              |
| PSCVT      | 3-phosphoshikimate 1-carboxyvinyltransferase    | (Ishi_357)                               | Phenylalanine Tyrosine Tryptophan Biosynthesis |
| PSD160     | Phosphatidylserine decarboxylase (n-C16:0)      | (Ishi_657)                               | Glycerophospholipid Metabolism                 |
| PSD161     | Phosphatidylserine decarboxylase (n-C16:1)      | (Ishi_657)                               | Glycerophospholipid Metabolism                 |
| PSP_L      | Phosphoserine phosphatase (L-serine)            | (Ishi_881)                               | Glycine, Serine and threonine metabolism       |
| PTPATi     | Pantetheine-phosphate adenylyltransferase       | (Ishi_56)                                | Pantothenate and CoA Biosynthesis              |
| PTRCabcpp  | Putrescine transport via ABC system (periplasm) | (Ishi_283)                               | Transport                                      |
| PYK        | Pyruvate kinase                                 | (Ishi_339)                               | Gluconeogenesis                                |
| RBFK       | Riboflavin kinase                               | (Ishi_760)                               | Riboflavin Metabolism                          |
| RHACOAR100 | RHACOAR100                                      | (Ishi_702)                               | PHAs Metabolism                                |
| RHACOAR120 | RHACOAR120                                      | (Ishi_702)                               | PHAs Metabolism                                |
| RHACOAR140 | RHACOAR140                                      | (Ishi_702)                               | PHAs Metabolism                                |
| RHACOAR60  | RHACOAR60                                       | (Ishi_702)                               | PHAs Metabolism                                |
| RHACOAR80  | RHACOAR80                                       | (Ishi_702)                               | PHAs Metabolism                                |
| RNDR1      | Ribonucleoside-diphosphate reductase (ADP)      | (Ishi_734) and (Ishi_887) and (Ishi_759) | Purine Metabolism                              |
| RNDR4      | Ribonucleoside-diphosphate reductase (UDP)      | (Ishi_148)                               | Pyrimidine Metabolism                          |
| RPE        | Ribulose 5-phosphate 3-epimerase                | (Ishi_898)                               | Pentose Phosphate Pathway                      |
| RPI        | Ribose-5-phosphate isomerase                    | (Ishi_985)                               | Pentose Phosphate Pathway                      |
| SDPDS      | Succinyl-diaminopimelate desuccinylase          | ((Ishi_984) or (Ishi_984))               | Lysine Biosynthesis                            |
| SDPTA      | Succinyldiaminopimelate transaminase            | (Ishi_577) or (Ishi_578)                 | Lysine Biosynthesis                            |
| SELMETAT   | Selenomethionine adenosyltransferase            | (Ishi_319)                               | Methionine Metabolism                          |
| SERAT      | Serine O-acetyltransferase                      | (Ishi_547)                               | Cysteine Metabolism                            |
| SERTRS     | Seryl-tRNA synthetase                           | (Ishi_693)                               | Glycine, Serine and threonine metabolism       |
| SHCHF      | Sirohydrochlorin ferrochelatase                 | (Ishi_622)                               | Porphyrin and Chlorophyll Metabolism           |

|           |                                                                                                                   |                                          |                                          |
|-----------|-------------------------------------------------------------------------------------------------------------------|------------------------------------------|------------------------------------------|
| SOTA      | Succinylornithine transaminase                                                                                    | (Ishi_731)                               | Arginine and Proline Metabolism          |
| SPMDabcpp | Spermidine transport via ABC system (periplasm)                                                                   | (Ishi_294)                               | Transport                                |
| SUCD1     | Succinate dehydrogenase                                                                                           | (Ishi_975) and (Ishi_976) and (Ishi_974) | TCA Cycle                                |
| SUCDi     | Succinate dehydrogenase (irreversible)                                                                            | (Ishi_975) and (Ishi_976) and (Ishi_974) | TCA Cycle                                |
| SUCOAS    | Succinyl-CoA synthetase (ADP-forming)                                                                             | (Ishi_111)                               | TCA Cycle                                |
| SULabcpp  | Sulfate transport via ABC system (periplasm)                                                                      | (Ishi_809)                               | Sulfur Metabolism                        |
| T2DECAI   | Trans-2-decenoyl-ACP isomerase                                                                                    | ((Ishi_244) or (Ishi_244))               | Fatty Acid Biosynthesis                  |
| TAURabcpp | Taurine transport via ABC system (periplasm)                                                                      | (Ishi_47)                                | Transport                                |
| NADTRHD   | NAD transhydrogenase                                                                                              | (Ishi_553) or (Ishi_984) or ((Ishi_986)  | Nicotinate and Nicotinamide              |
| THRS      | Threonine synthase                                                                                                | (Ishi_612)                               | Glycine, Serine and threonine metabolism |
| THRTRS    | Threonyl-tRNA synthetase                                                                                          | (Ishi_612)                               | Glycine, Serine and threonine metabolism |
| TKT1      | Transketolase                                                                                                     | (Ishi_84)                                | Pentose Phosphate Pathway                |
| TPI       | Triose-phosphate isomerase                                                                                        | (Ishi_74)                                | Gluconeogenesis                          |
| TRDR      | Thioredoxin reductase (NADPH)                                                                                     | (Ishi_781)                               | Pyrimidine Metabolism                    |
| TSULabcpp | Thiosulfate transport via ABC system (periplasm)                                                                  | (Ishi_677) or (Ishi_230)                 | Sulfur Metabolism                        |
| UAGDP     | UDP-N-acetylglucosamine diphosphorylase                                                                           | (Ishi_862)                               | Aminosugar Metabolism                    |
| UAGPT3    | UDP-N-acetylglucosamine-N-acetylmuramyl-(pentapeptide)pyrophosphoryl-undecaprenol N-acetylglucosamine transferase | (Ishi_1030)                              | Peptidoglycan Biosynthesis               |
| UAMAGS    | UDP-N-acetylmuramoyl-L-alanyl-D-glutamate synthetase                                                              | (Ishi_1032)                              | Glutamate Metabolism                     |
| UAMAS     | UDP-N-acetylmuramoyl-L-alanine synthetase                                                                         | (Ishi_303)                               | Glutamate metabolism                     |
| UDCPDP    | Undecaprenyl-diphosphatase                                                                                        | (Ishi_641)                               | Peptidoglycan Biosynthesis               |
| UGMDDS    | UDP-N-acetylmuramoyl-L-alanyl-D-glutamyl-meso-2,6-diaminopimeloyl-D-alanyl-D-alanine synthetase                   | (Ishi_1034)                              | Peptidoglycan Biosynthesis               |
| UMPK      | UMP kinase                                                                                                        | (Ishi_449)                               | Pyrimidine Metabolism                    |

|                  |                                                                                                                        |                                                                                                       |                                             |
|------------------|------------------------------------------------------------------------------------------------------------------------|-------------------------------------------------------------------------------------------------------|---------------------------------------------|
| UPP3MT           | Uroporphyrinogen methyltransferase                                                                                     | (Ishi_622)                                                                                            | Porphyrin and Chlorophyll Metabolism        |
| UPPDC1           | Uroporphyrinogen decarboxylase (uroporphyrinogen III)                                                                  | (Ishi_413)                                                                                            | Porphyrin and Chlorophyll Metabolism        |
| VALTRS           | Valyl-tRNA synthetase                                                                                                  | (Ishi_851)                                                                                            | Valine, Leucine, and Isoleucine Metabolism  |
| pentso3abcpp     | Pentso3abcpp                                                                                                           | (Ishi_638) or ((Ishi_677) or (Ishi_230)) or (Ishi_638)                                                | Transport                                   |
| ACOLIPAabctex    | Arabinose modified core oligosaccharide lipid A transport via ABC system (periplasm to extracellular)                  | ((Ishi_286) and (Ishi_485)) or (Ishi_699) or (Ishi_677) or (Ishi_9) or (Ishi_525)                     | Lipopolysaccharide Biosynthesis / Recycling |
| ALATA_D2         | D-alanine transaminase                                                                                                 | (Ishi_240)                                                                                            | Cofactor and Prosthetic Group Biosynthesis  |
| ALATA_L2         | Alanine transaminase                                                                                                   | (Ishi_240)                                                                                            | Cofactor and Prosthetic Group Biosynthesis  |
| AMPTASECG        | Alanyl aminopeptidase (cys-gly)                                                                                        | (Ishi_285)                                                                                            | Cysteine Metabolism                         |
| AMPTASEPG        | Aminopeptidase (pro-gly)                                                                                               | (Ishi_285)                                                                                            | Arginine and Proline Metabolism             |
| ASCBptspp        | L-ascorbate transport via PEP:Pyr PTS (periplasm)                                                                      | (Ishi_1107)                                                                                           | Transport, Inner Membrane                   |
| BUTSO3abcpp      | Butanesulfonate transport via ABC system (periplasm)                                                                   | ((Ishi_637) and (Ishi_638) and (Ishi_770)) or (Ishi_230) or (Ishi_638) or ((Ishi_677) and (Ishi_231)) | Transport, Inner Membrane                   |
| CLIPAabctex      | Cold lipid A transport via ABC system (periplasm to extracellular)                                                     | (Ishi_501) and (Ishi_286) and (Ishi_485) and (Ishi_484) and (Ishi_288) and (Ishi_344)                 | Lipopolysaccharide Biosynthesis / Recycling |
| COLIPAPabctex    | Core oligosaccharide lipid A diphosphate transport via ABC system (periplasm to extracellular)                         | ((Ishi_286) and (Ishi_484) and (Ishi_485))                                                            | Lipopolysaccharide Biosynthesis / Recycling |
| COLIPAabctex     | Core oligosaccharide lipid A transport via ABC system (periplasm to extracellular)                                     | ((Ishi_286) and (Ishi_484) and (Ishi_485) and (Ishi_699))                                             | Lipopolysaccharide Biosynthesis / Recycling |
| CRNDabcpp        | D-carnitine transport via ABC system (periplasm)                                                                       | ((Ishi_230) and (Ishi_231))                                                                           | Transport, Inner Membrane                   |
| CYSSADS          | L-cysteine sulfinic acid desulfurase                                                                                   | (Ishi_993)                                                                                            | Cysteine Metabolism                         |
| ECA4COLIPAabctex | Enterobacterial common antigen (x4) core oligosaccharide lipid A transport via ABC system (periplasm to extracellular) | ((Ishi_484) and (Ishi_501) and (Ishi_485) and (Ishi_286))                                             | Lipopolysaccharide Biosynthesis / Recycling |
| ENLIPAabctex     | Phosphoethanolamine lipid A transport via ABC system (periplasm to extracellular)                                      | ((Ishi_485) and (Ishi_286) and (Ishi_484))                                                            | Lipopolysaccharide Biosynthesis / Recycling |

|                   |                                                                                                     |                                                                                                                                                                                                               |                                             |
|-------------------|-----------------------------------------------------------------------------------------------------|---------------------------------------------------------------------------------------------------------------------------------------------------------------------------------------------------------------|---------------------------------------------|
| FHL               | Formate-hydrogen lyase                                                                              | (Ishi_772) and (Ishi_771) and (Ishi_775) and (Ishi_765) and (Ishi_772) and (Ishi_776) and (Ishi_767) or (Ishi_777)                                                                                            | Pyruvate Metabolism                         |
| GRXR              | Glutaredoxin reductase                                                                              | ((Ishi_981) and (Ishi_891))                                                                                                                                                                                   | Unassigned                                  |
| HYD1pp            | Hydrogenase (ubiquinone-8: 2 protons) (periplasm)                                                   | (Ishi_765) and (Ishi_772) and (Ishi_767) and (Ishi_766) and (Ishi_771) and (Ishi_775) and (Ishi_776) and (Ishi_777)                                                                                           | Oxidative Phosphorylation                   |
| K2L4Aabctex       | KDO(2)-lipid IV A transport via ABC system (periplasm to extracellular)                             | (Ishi_834)                                                                                                                                                                                                    | Lipopolysaccharide Biosynthesis / Recycling |
| KDOPS             | 3-deoxy -D-manno-octulosonic -acid 8-phosphate synthase                                             | (Ishi_560)                                                                                                                                                                                                    | Lipopolysaccharide Biosynthesis / Recycling |
| LIPAabctex        | Lipid A transport via ABC system (periplasm to extracellular)                                       | (Ishi_834)                                                                                                                                                                                                    | Lipopolysaccharide Biosynthesis / Recycling |
| NADH17pp          | NADH dehydrogenase (menaquinone-8 & 3 protons) (periplasm)                                          | (Ishi_764) and (Ishi_765) and (Ishi_766) and (Ishi_767) and (Ishi_768) and (Ishi_769) and (Ishi_770) and (Ishi_771) and (Ishi_772) and (Ishi_773) and (Ishi_774) and (Ishi_775) and (Ishi_776) and (Ishi_777) | Oxidative Phosphorylation                   |
| NADH18pp          | NADH dehydrogenase (demethylmenaquinone-8 & 3 protons) (periplasm)                                  | (Ishi_764) and (Ishi_765) and (Ishi_766) and (Ishi_767) and (Ishi_768) and (Ishi_769) and (Ishi_770) and (Ishi_771) and (Ishi_772) and (Ishi_773) and (Ishi_774) and (Ishi_775) and (Ishi_776) and (Ishi_777) | Oxidative Phosphorylation                   |
| NADHHR            | NADH hydratase                                                                                      | (Ishi_579)                                                                                                                                                                                                    | Metabolite Repair                           |
| NADHHS            | NADH hydratase                                                                                      | (Ishi_579)                                                                                                                                                                                                    | Metabolite Repair                           |
| NADPHHR           | NADPH hydratase                                                                                     | (Ishi_579)                                                                                                                                                                                                    | Metabolite Repair                           |
| NADPHHS           | NADPH hydratase                                                                                     | (Ishi_579)                                                                                                                                                                                                    | Metabolite Repair                           |
| O16A4COLIPAabctex | O16 antigen (x4) core oligosaccharide lipid A transport via ABC system (periplasm to extracellular) | (Ishi_483) and (Ishi_484) and (Ishi_485)                                                                                                                                                                      | Lipopolysaccharide Biosynthesis / Recycling |
| OCTDPS            | Octaprenyl pyrophosphate synthase                                                                   | (Ishi_473)                                                                                                                                                                                                    | Cofactor and Prosthetic Group Biosynthesis  |
| OMBZLM            | 2-Octaprenyl-6-methoxy-benzoquinol methylase                                                        | (Ishi_473)                                                                                                                                                                                                    | Cofactor and Prosthetic Group Biosynthesis  |
| RNDR4b            | Ribonucleoside-diphosphate reductase (UDP) (glutaredoxin)                                           | (Ishi_462)                                                                                                                                                                                                    | Nucleotide Salvage Pathway                  |
| S2FE2SR           | SUF [2Fe-2S] regeneration                                                                           | (Ishi_990) and (Ishi_991) and (Ishi_992)                                                                                                                                                                      | Cofactor and Prosthetic Group Biosynthesis  |

|               |                                                                       |                                                                                                       |                                            |
|---------------|-----------------------------------------------------------------------|-------------------------------------------------------------------------------------------------------|--------------------------------------------|
| S2FE2SS       | SUF [2Fe-2S] Synthesis                                                | (Ishi_990) and (Ishi_991) and (Ishi_992)                                                              | Cofactor and Prosthetic Group Biosynthesis |
| S2FE2SS2      | SUF [2Fe-2S] Synthesis II                                             | (Ishi_990) and (Ishi_991) and (Ishi_992)                                                              | Cofactor and Prosthetic Group Biosynthesis |
| S2FE2ST       | SUF [2Fe-2S] Transfer                                                 | (Ishi_990) and (Ishi_991) and (Ishi_992)                                                              | Cofactor and Prosthetic Group Biosynthesis |
| S4FE4SR       | SUF [4Fe-4S] Reduction                                                | (Ishi_991) and (Ishi_992) and (Ishi_990)                                                              | Cofactor and Prosthetic Group Biosynthesis |
| S4FE4ST       | SUF [4Fe-4S] Transfer                                                 | (Ishi_990) and (Ishi_991) and (Ishi_992)                                                              | Cofactor and Prosthetic Group Biosynthesis |
| SCYSDS        | SUF Cysteine desulfuration                                            | (Ishi_993)                                                                                            | Cofactor and Prosthetic Group Biosynthesis |
| FEex          | Iron transporter                                                      | ((Ishi_834) and (Ishi_658)) or (Ishi_69)                                                              | iron metabolism                            |
| FEpp          | Iron transporter                                                      | ((Ishi_658) and (Ishi_834))                                                                           | iron metabolism                            |
| Kt3pp         | Potassium transport out via proton antiport (periplasm)               | (Ishi_738)                                                                                            | Inorganic Ion Transport and Metabolism     |
| 2DHGLCNkt_tpp | 2DHGLCNkt tpp                                                         | (VBICanLib64949_0763)                                                                                 | Transport                                  |
| 4HTHRS        | 4-Hydroxy-L-threonine synthase                                        | (VBICanLib64949_0372)                                                                                 | Vitamin B6 Metabolism                      |
| ACCOAC        | Acetyl-CoA carboxylase                                                | ((VBICanLib64949_0413) and (VBICanLib64949_0158) and (VBICanLib64949_0656) and (VBICanLib64949_0159)) | Fatty Acid Biosynthesis                    |
| ACGS          | N-acetylglutamate synthase                                            | (VBICanLib64949_0394) or (VBICanLib64949_0221)                                                        | Urea cycle/amino group metabolism          |
| ACHBS         | 2-aceto-2-hydroxybutanoate synthase                                   | (VBICanLib64949_0019)                                                                                 | Valine, Leucine, and Isoleucine Metabolism |
| ACOATA        | Acetyl-CoA ACP transacylase                                           | ((VBICanLib64949_0712) and (VBICanLib64949_0745))                                                     | Fatty Acid Biosynthesis                    |
| ACONT         | Aconitate hydratase                                                   | (VBICanLib64949_0356)                                                                                 | TCA Cycle                                  |
| ACONTa        | Aconitase (half-reaction A, Citrate hydro-lyase)                      | (VBICanLib64949_0356)                                                                                 | TCA Cycle                                  |
| ACONTb        | Aconitase (half-reaction B, Isocitrate hydro-lyase)                   | (VBICanLib64949_0356)                                                                                 | TCA Cycle                                  |
| ADSL1r        | Adenylosuccinate lyase                                                | (VBICanLib64949_0903)                                                                                 | Purine Metabolism                          |
| ADSL2r        | Adenylosuccinate lyase                                                | (VBICanLib64949_0903) or (VBICanLib64949_0077) or (VBICanLib64949_0272)                               | Purine Metabolism                          |
| AGPAT120      | 1-tetradecanoyl-sn-glycerol 3-phosphate O-acyltransferase (n-C12:0)   | (VBICanLib64949_0664)                                                                                 | Glycerophospholipid Metabolism             |
| AGPAT160      | 1-hexadecanoyl-sn-glycerol 3-phosphate O-acyltransferase (n-C16:0)    | (VBICanLib64949_0664)                                                                                 | Glycerophospholipid Metabolism             |
| AGPAT161      | 1-hexadec-7-enoyl-sn-glycerol 3-phosphate O-acyltransferase (n-C16:1) | (VBICanLib64949_0664)                                                                                 | Glycerophospholipid Metabolism             |

|          |                                                                       |                                                                                                                                                            |                                                |
|----------|-----------------------------------------------------------------------|------------------------------------------------------------------------------------------------------------------------------------------------------------|------------------------------------------------|
| AGPAT180 | 1-octadecanoyl-sn-glycerol 3-phosphate O-acyltransferase (n-C18:0)    | (VBICanLib64949_0664)                                                                                                                                      | Glycerophospholipid Metabolism                 |
| AGPAT181 | 1-octadec-7-enoyl-sn-glycerol 3-phosphate O-acyltransferase (n-C18:1) | (VBICanLib64949_0664)                                                                                                                                      | Glycerophospholipid Metabolism                 |
| AKGDH    | 2-Oxogluterate dehydrogenase                                          | ((VBICanLib64949_0988) and (VBICanLib64949_0986) and (VBICanLib64949_0987))                                                                                |                                                |
| ALAALAr  | D-alanine-D-alanine ligase (reversible)                               | (VBICanLib64949_11176)                                                                                                                                     | Peptidoglycan Biosynthesis                     |
| ANPRT    | Anthranilate phosphoribosyltransferase                                | (VBICanLib64949_0317)                                                                                                                                      | Phenylalanine Tyrosine Tryptophan Biosynthesis |
| ANS      | Anthranilate synthase                                                 | (VBICanLib64949_0317)                                                                                                                                      | Phenylalanine Tyrosine Tryptophan Biosynthesis |
| ARGSL    | Argininosuccinate lyase                                               | (VBICanLib64949_0272)                                                                                                                                      | Arginine and Proline Metabolism                |
| ARGSS    | Argininosuccinate synthase                                            | (VBICanLib64949_0124)                                                                                                                                      | Arginine and Proline Metabolism                |
|          |                                                                       | ((VBICanLib64949_1047) and (VBICanLib64949_0058)) or ((VBICanLib64949_1046) and (VBICanLib64949_1047) and (VBICanLib64949_0058) and (VBICanLib64949_0057)) |                                                |
| ARGabcpp | L-arginine transport via ABC system (periplasm)                       | (VBICanLib64949_0058) and (VBICanLib64949_0057))                                                                                                           | Transport                                      |
| ASAD     | Aspartate-semialdehyde dehydrogenase                                  | (VBICanLib64949_0200)                                                                                                                                      | Lysine Biosynthesis                            |
| ASNS1    | Asparagine synthase (glutamine-hydrolysing)                           | (VBICanLib64949_0234)                                                                                                                                      | Alanine and Aspartate Metabolism               |
|          |                                                                       | ((VBICanLib64949_0057) and (VBICanLib64949_0056) and (VBICanLib64949_1046)) or (VBICanLib64949_1047)                                                       |                                                |
| ASPabcpp | L-aspartate transport via ABC system (periplasm)                      | (VBICanLib64949_1046)) or (VBICanLib64949_1047)                                                                                                            | Transport                                      |
| ATPPRT   | ATP phosphoribosyltransferase                                         | (VBICanLib64949_0372)                                                                                                                                      | Histidine Metabolism                           |
|          |                                                                       | ((VBICanLib64949_0626) and (VBICanLib64949_0629) and (VBICanLib64949_1023) and (VBICanLib64949_0627) and (VBICanLib64949_0625) and (VBICanLib64949_0628))  |                                                |
| ATPS4rpp | ATP synthase (four protons for one ATP) (periplasm)                   | (VBICanLib64949_0625) and (VBICanLib64949_0628))                                                                                                           | Oxidative Phosphorylation                      |
| BZt1pp   | Benzoate transport in via proton symport (periplasm)                  | (VBICanLib64949_0289)                                                                                                                                      | B-Ketoadipate pathway                          |

|            |                                                                    |                                                                                                                                                        |                                          |
|------------|--------------------------------------------------------------------|--------------------------------------------------------------------------------------------------------------------------------------------------------|------------------------------------------|
| CHLabcpp   | Choline transport via ABC system (periplasm)                       | ((VBICanLib64949_0240) and (VBICanLib64949_0239)) or (VBICanLib64949_0538) or (VBICanLib64949_0648) or (VBICanLib64949_0686)                           | Transport                                |
| CHOLS_ex   | CHOLS LPAREN ex RPAREN                                             | (VBICanLib64949_0372)                                                                                                                                  | Transport                                |
| DAPE       | Diaminopimelate epimerase                                          | (VBICanLib64949_0531)                                                                                                                                  | Lysine Biosynthesis                      |
| CHOLSabc   | CHOLSabc                                                           | ((VBICanLib64949_0241) and (VBICanLib64949_0240) and (VBICanLib64949_0239)) or (VBICanLib64949_0538) or (VBICanLib64949_0648) or (VBICanLib64949_0686) | Glycine, Serine and threonine metabolism |
| CITtex     | Citrate transport via diffusion (extracellular to periplasm)       | (VBICanLib64949_0828)                                                                                                                                  | Transport                                |
| COBALT2tex | Cobalt (Co+2) transport via diffusion (extracellular to periplasm) | (VBICanLib64949_0647)                                                                                                                                  | Transport                                |
| COBALT2tpp | Cobalt transport in via permease (no H+)                           | (VBICanLib64949_0647)                                                                                                                                  | Transport                                |
| CS         | Citrate synthase                                                   | ((VBICanLib64949_0239) and (VBICanLib64949_0240))                                                                                                      | TCA Cycle                                |
| CTPS2      | CTP synthase (glutamine)                                           | ((VBICanLib64949_0239) and (VBICanLib64949_0240))                                                                                                      | Pyrimidine Metabolism                    |
| CYO1b      | CYO1b                                                              | ((VBICanLib64949_0381) and (VBICanLib64949_0382))                                                                                                      | Oxidative Phosphorylation                |
| CYSabcpp   | L-cysteine uptake via ABC system (periplasm)                       | ((VBICanLib64949_0712) and (VBICanLib64949_0745))                                                                                                      | Transport                                |
| DAPDC      | Diaminopimelate decarboxylase                                      | (VBICanLib64949_0273) or (VBICanLib64949_0273)                                                                                                         | Lysine Biosynthesis                      |
| DASYN120   | CDP-diacylglycerol synthetase (n-C12:0)                            | (VBICanLib64949_0461)                                                                                                                                  | Glycerophospholipid Metabolism           |
| DASYN160   | CDP-diacylglycerol synthetase (n-C16:0)                            | (VBICanLib64949_0461)                                                                                                                                  | Glycerophospholipid Metabolism           |
| DASYN161   | CDP-diacylglycerol synthetase (n-C16:1)                            | (VBICanLib64949_0461)                                                                                                                                  | Glycerophospholipid Metabolism           |
| DASYN180   | CDP-diacylglycerol synthetase (n-C18:0)                            | (VBICanLib64949_0461)                                                                                                                                  | Glycerophospholipid Metabolism           |



|          |                                                          |                                                                            |                                                |
|----------|----------------------------------------------------------|----------------------------------------------------------------------------|------------------------------------------------|
| DASYN181 | CDP-diacylglycerol synthetase (n-C18:1)                  | (VBICanLib64949_0461)                                                      | Glycerophospholipid Metabolism                 |
| DB4PS    | 3,4-Dihydroxy-2-butanone-4-phosphate synthase            | (VBICanLib64949_0261)                                                      | Riboflavin Metabolism                          |
| DDPA     | 3-deoxy-D-arabino-heptulosonate 7-phosphate synthetase   | (VBICanLib64949_0573)                                                      | Phenylalanine Tyrosine Tryptophan Biosynthesis |
| DHPM1    | Dihydropyrimidinase (5,6-dihydrouracil)                  | (VBICanLib64949_0195)                                                      | Pantothenate and CoA Biosynthesis              |
| DMATT    | Dimethylallyltranstransferase                            | (VBICanLib64949_1045) or (VBICanLib64949_0484)                             | Steroid biosynthesis                           |
| DNAMTn2r | DNA (cytosine-5-)-methyltransferase                      | (VBICanLib64949_0729) or (VBICanLib64949_0728)                             | Methionine Metabolism                          |
| DNTPPA   | Dihydroneopterin triphosphate pyrophosphatase            | (VBICanLib64949_0220)                                                      | Folate Biosynthesis                            |
| DPCOAK   | Dephospho-CoA kinase                                     | (VBICanLib64949_0415)                                                      | Pantothenate and CoA Biosynthesis              |
| DPR      | 2-dehydropantoate 2-reductase                            | (VBICanLib64949_1033)                                                      | Pantothenate and CoA Biosynthesis              |
| DTMPK    | DTMP kinase                                              | (VBICanLib64949_0107)                                                      | Pyrimidine Metabolism                          |
| DURAD    | Dihydrouracil dehydrogenase (NADP)                       | (VBICanLib64949_0338)                                                      | Pantothenate and CoA Biosynthesis              |
| DUTPDP   | DUTP diphosphatase                                       | (VBICanLib64949_0960)                                                      | Pyrimidine Metabolism                          |
| DXPS     | 1-deoxy-D-xylulose 5-phosphate synthase                  | (VBICanLib64949_0569)                                                      | Steroid biosynthesis                           |
| EAR100y  | Enoyl-[acyl-carrier-protein] reductase (NADPH) (n-C10:0) | (VBICanLib64949_0369) or (VBICanLib64949_1104)                             | Fatty Acid Biosynthesis                        |
| EAR120y  | Enoyl-[acyl-carrier-protein] reductase (NADPH) (n-C12:0) | ((VBICanLib64949_0239) and (VBICanLib64949_0240))                          | Fatty Acid Biosynthesis                        |
| EAR121y  | Enoyl-[acyl-carrier-protein] reductase (NADPH) (n-C12:1) | (VBICanLib64949_0239) and (VBICanLib64949_0240)                            | Fatty Acid Biosynthesis                        |
| EAR160y  | Enoyl-[acyl-carrier-protein] reductase (NADPH) (n-C16:0) | ((VBICanLib64949_0538) and (VBICanLib64949_0240)) or (VBICanLib64949_0239) | Fatty Acid Biosynthesis                        |
| EAR161y  | Enoyl-[acyl-carrier-protein] reductase (NADPH) (n-C16:1) | (VBICanLib64949_0369) or (VBICanLib64949_1104)                             | Fatty Acid Biosynthesis                        |
| EAR180y  | Enoyl-[acyl-carrier-protein] reductase (NADPH) (n-C18:0) | (VBICanLib64949_0369) or (VBICanLib64949_1104)                             | Fatty Acid Biosynthesis                        |
| EAR181y  | Enoyl-[acyl-carrier-protein] reductase (NADPH) (n-C18:1) | (VBICanLib64949_0369) or (VBICanLib64949_1104)                             | Fatty Acid Biosynthesis                        |

|             |                                                                  |                                                                                                       |                                      |
|-------------|------------------------------------------------------------------|-------------------------------------------------------------------------------------------------------|--------------------------------------|
| EAR40y      | Enoyl-[acyl-carrier-protein] reductase (NADPH) (n-C4:0)          | (VBICanLib64949_0369) or (VBICanLib64949_1104)                                                        | Fatty Acid Biosynthesis              |
| EAR60y      | Enoyl-[acyl-carrier-protein] reductase (NADPH) (n-C6:0)          | (VBICanLib64949_0369) or (VBICanLib64949_1104)                                                        | Fatty Acid Biosynthesis              |
| EAR80y      | Enoyl-[acyl-carrier-protein] reductase (NADPH) (n-C8:0)          | (VBICanLib64949_0369) or (VBICanLib64949_1104)                                                        | Fatty Acid Biosynthesis              |
| ETHSO3abcpp | Ethanesulfonate transport via ABC system (periplasm)             | ((VBICanLib64949_0648) and (VBICanLib64949_0647) and (VBICanLib64949_0776))                           | Transport                            |
| FDH         | Formate dehydrogenase                                            | ((VBICanLib64949_0776) and (VBICanLib64949_0775) and (VBICanLib64949_0774))                           | Methane Metabolism                   |
| FE2abc      | Iron (II) transport via ABC system                               | (VBICanLib64949_0239)) or ((VBICanLib64949_0686) and (VBICanLib64949_0685) and (VBICanLib64949_0681)) | Transport                            |
| FTHFD       | Formyltetrahydrofolate deformylase                               | (VBICanLib64949_0588)                                                                                 | One Carbon pool by folate            |
| FUM         | Fumarase                                                         | ((VBICanLib64949_0131) or (VBICanLib64949_0292))                                                      | TCA Cycle                            |
| FUMtex      | Fumarate transport via diffusion (extracellular to periplasm)    | (VBICanLib64949_0077)                                                                                 | Transport                            |
| G1SAT       | Glutamate-1-semialdehyde aminotransferase                        | (VBICanLib64949_0336)                                                                                 | Porphyrin and Chlorophyll Metabolism |
| G3PAT120    | Glycerol-3-phosphate acyltransferase (C12:0)                     | (VBICanLib64949_0712)                                                                                 | Glycerophospholipid Metabolism       |
| G3PAT160    | Glycerol-3-phosphate acyltransferase (C16:0)                     | (VBICanLib64949_0712)                                                                                 | Glycerophospholipid Metabolism       |
| G3PAT161    | Glycerol-3-phosphate acyltransferase (C16:1)                     | (VBICanLib64949_0712)                                                                                 | Glycerophospholipid Metabolism       |
| G3PAT180    | Glycerol-3-phosphate acyltransferase (C18:0)                     | (VBICanLib64949_0712)                                                                                 | Glycerophospholipid Metabolism       |
| G3PAT181    | Glycerol-3-phosphate acyltransferase (C18:1)                     | (VBICanLib64949_0712)                                                                                 | Glycerophospholipid Metabolism       |
| GART        | GAR transformylase-T                                             | (VBICanLib64949_0041)                                                                                 | Purine Metabolism                    |
| GLCNt2rpp   | D-gluconate transport via proton symport, reversible (periplasm) | (VBICanLib64949_0250)                                                                                 | Transport                            |

|             |                                                                     |                                                                                                      |                                          |
|-------------|---------------------------------------------------------------------|------------------------------------------------------------------------------------------------------|------------------------------------------|
| GLCabcpp    | D-glucose transport via ABC system (periplasm)                      | (VBICanLib64949_0058) or (VBICanLib64949_0239) or (VBICanLib64949_0686)                              | Transport                                |
| GLNS        | Glutamine synthetase                                                | ((VBICanLib64949_1046) and (VBICanLib64949_1047) and (VBICanLib64949_0058)) or (VBICanLib64949_0648) | Glutamate Metabolism                     |
| GLNTRAT     | Glutamyl-tRNA(Gln) amidotransferase                                 | ((VBICanLib64949_0907) and (VBICanLib64949_0909) and (VBICanLib64949_0908))                          | Glutamate Metabolism                     |
| GLUSy       | Glutamate synthase (NADPH)                                          | (VBICanLib64949_0175)                                                                                | Glutamate Metabolism                     |
| GLUt4pp     | Na <sup>+</sup> /glutamate symport (periplasm)                      | (VBICanLib64949_0894)                                                                                | Transport                                |
| GLXCL       | Glyoxalate carboligase                                              | (VBICanLib64949_0189) or (VBICanLib64949_0570)                                                       | Glycolate metabolism                     |
| GLYALDtex   | Glyceraldehyde transport via diffusion (extracellular to periplasm) | (VBICanLib64949_0402) or (VBICanLib64949_0057)                                                       | Transport                                |
| GLYBabcpp   | Glycine betaine transport via ABC system (periplasm)                | (VBICanLib64949_0289)                                                                                | Arginine and Proline Metabolism          |
| GLYCK       | Glycerate kinase                                                    | (VBICanLib64949_0837)                                                                                | Glycine, Serine and threonine metabolism |
| GLYCL       | Glycine Cleavage System                                             | (VBICanLib64949_0566)) or (VBICanLib64949_0988) or (VBICanLib64949_0990)                             | Glycine, Serine and threonine metabolism |
| GLYCLTt2rpp | Glycolate transport via proton symport, reversible (periplasm)      | (VBICanLib64949_0566)) or (VBICanLib64949_0988) or (VBICanLib64949_0990)                             | Transport                                |
| GLYCLTtex   | Glycolate transport via diffusion (extracellular to periplasm)      | (VBICanLib64949_0566)) or (VBICanLib64949_0988) or (VBICanLib64949_0990)                             | Transport                                |
| GLYCL_2     | Glycine cleavage system, cytosol                                    | (VBICanLib64949_0990)                                                                                | Nitrogen Metabolism                      |
| GLYCTO1     | Glycolate oxidase                                                   | (VBICanLib64949_0478)                                                                                | Glycolate metabolism                     |
| GLYTRS      | Glycyl-tRNA synthetase                                              | ((VBICanLib64949_0058) and (VBICanLib64949_0240))                                                    | Glycine, Serine and threonine metabolism |
| GMPS2       | GMP synthase                                                        | ((VBICanLib64949_1028) and (VBICanLib64949_0482))                                                    | Purine Metabolism                        |

|          |                                                                          |                                                                               |                                                |
|----------|--------------------------------------------------------------------------|-------------------------------------------------------------------------------|------------------------------------------------|
| GND      | Phosphogluconate dehydrogenase                                           | (VBICanLib64949_0525) or<br>(VBICanLib64949_0292)<br>(VBICanLib64949_1045) or | Pentose Phosphate Pathway                      |
| GRTT     | Geranyltranstransferase                                                  | (VBICanLib64949_0484)                                                         | Steroid biosynthesis                           |
| GTHPi    | Glutathione perioxidase                                                  | (VBICanLib64949_1154)                                                         | Glutathione Metabolism                         |
| GTHS     | Glutathione synthetase                                                   | (VBICanLib64949_0547)                                                         | Glutamate Metabolism                           |
| GTPCII   | GTP cyclohydrolase II                                                    | (VBICanLib64949_0261)                                                         | Riboflavin Metabolism                          |
| HCO3_NAt | Bicarbonate transport (Na/HCO3<br>cotransport)                           | (VBICanLib64949_0845)                                                         | Transport                                      |
| HEMEOS   | Heme O synthase                                                          | (VBICanLib64949_0262)                                                         | Porphyrin and Chlorophyll Metabolism           |
| HMBS     | Hydroxymethylbilane synthase                                             | (VBICanLib64949_0972)                                                         | Porphyrin and Chlorophyll Metabolism           |
| HMGL     | Hydroxymethylglutaryl-CoA lyase                                          | (VBICanLib64949_0081)                                                         | Synthesis and degradation of Ketones Bodies    |
| HPPK     | 2-amino-4-hydroxy-6-<br>hydroxymethyldihydropteridine<br>diphosphokinase | (VBICanLib64949_1086)                                                         | Folate Biosynthesis                            |
| HXAteX   | Hexanoate transport via diffusion<br>(extracellular to periplasm)        | (VBICanLib64949_0845)                                                         | Transport                                      |
| ICDHyr   | Isocitrate dehydrogenase (NADP)                                          | (VBICanLib64949_0822)                                                         | TCA Cycle                                      |
| ICITtex  | Citrate transport via diffusion<br>extracellular to periplasm            | (VBICanLib64949_0896)                                                         | Transport                                      |
| ICL      | Isocitrate lyase                                                         | (VBICanLib64949_0386)                                                         | TCA Cycle                                      |
| IGPS     | Indole-3-glycerol-phosphate synthase                                     | (VBICanLib64949_0019)                                                         | Phenylalanine Tyrosine Tryptophan Biosynthesis |
| ILEabcpp | L-isoleucine transport via ABC system<br>(periplasm)                     | (VBICanLib64949_0896)                                                         | Transport                                      |
| IPDDI    | Isopentenyl-diphosphate D-isomerase                                      | (VBICanLib64949_1010)                                                         | Steroid biosynthesis                           |
| IPDPS    | 1-hydroxy-2-methyl-2-(E)-butenyl 4-<br>diphosphate reductase (ipdp)      | (VBICanLib64949_0965)                                                         | Steroid biosynthesis                           |
| IPMD     | 3-isopropylmalate dehydrogenase                                          | (VBICanLib64949_0822)                                                         | Valine, Leucine, and Isoleucine Metabolism     |
| IPPMIa   | 3-isopropylmalate dehydratase                                            | (VBICanLib64949_0356) or<br>(VBICanLib64949_0742)                             | Valine, Leucine, and Isoleucine Metabolism     |
| IPPMIb   | 2-isopropylmalate hydratase                                              | (VBICanLib64949_0356) or<br>(VBICanLib64949_0742)                             | Valine, Leucine, and Isoleucine Metabolism     |
| KARA1    | Ketol-acid reductoisomerase (2,3-<br>dihydroxy-3-methylbutanoate)        | (VBICanLib64949_1167)                                                         | Valine, Leucine, and Isoleucine Metabolism     |
| KARA2    | Ketol-acid reductoisomerase (2-<br>Acetolactate)                         | (VBICanLib64949_1167)                                                         | Valine, Leucine, and Isoleucine Metabolism     |

|           |                                                                        |                                                                                                                                                                                                                                                                                                                         |                                            |
|-----------|------------------------------------------------------------------------|-------------------------------------------------------------------------------------------------------------------------------------------------------------------------------------------------------------------------------------------------------------------------------------------------------------------------|--------------------------------------------|
| KAS14     | Beta-ketoacyl-ACP synthase                                             | (VBICanLib64949_0368)                                                                                                                                                                                                                                                                                                   | Fatty Acid Biosynthesis                    |
| LEUTRS    | Leucyl-tRNA synthetase                                                 | (VBICanLib64949_0432)                                                                                                                                                                                                                                                                                                   | Valine, Leucine, and Isoleucine Metabolism |
| LEUabcpp  | L-leucine transport via ABC system (periplasm)                         | (VBICanLib64949_0896) and (VBICanLib64949_1093)                                                                                                                                                                                                                                                                         | Transport                                  |
| LYSTRS    | Lysyl-tRNA synthetase                                                  | (VBICanLib64949_1052)                                                                                                                                                                                                                                                                                                   | Lysine Biosynthesis                        |
| LYSabcpp  | L-lysine transport via ABC system (periplasm)                          | (VBICanLib64949_0058)                                                                                                                                                                                                                                                                                                   | Lysine Metabolism                          |
| MACPD     | Malonyl-ACP decarboxylase                                              | (VBICanLib64949_0058)                                                                                                                                                                                                                                                                                                   | Fatty Acid Biosynthesis                    |
| MSO3abcpp | Methanesulfonate transport via ABC system (periplasm)                  | (VBICanLib64949_0647)                                                                                                                                                                                                                                                                                                   | Transport                                  |
| MTHFC     | Methenyltetrahydrofolate cyclohydrolase                                | (VBICanLib64949_0737)                                                                                                                                                                                                                                                                                                   | One Carbon pool by folate                  |
| MTHFD     | Methylenetetrahydrofolate dehydrogenase (NADP)                         | (VBICanLib64949_0737)                                                                                                                                                                                                                                                                                                   | One Carbon pool by folate                  |
| MHPGLUT   | 5 methyltetrahydropteroyltriglutamate homocysteine S methyltransferase | (VBICanLib64949_1018)                                                                                                                                                                                                                                                                                                   | Methionine Metabolism                      |
|           |                                                                        | (VBICanLib64949_0770) and (VBICanLib64949_0771) and (VBICanLib64949_0772) and (VBICanLib64949_0773) and (VBICanLib64949_0774) and (VBICanLib64949_0775) and (VBICanLib64949_0776) and (VBICanLib64949_0777) and (VBICanLib64949_0778) and (VBICanLib64949_0779) and (VBICanLib64949_0780) and (VBICanLib64949_0781) and |                                            |
| NADH16pp  | NADH dehydrogenase (ubiquinone-8 & 3 protons) (periplasm)              | (VBICanLib64949_0782) and (VBICanLib64949_0783)                                                                                                                                                                                                                                                                         | Oxidative Phosphorylation                  |
| NADK      | NAD kinase                                                             | (VBICanLib64949_0485)                                                                                                                                                                                                                                                                                                   | Nicotinate and Nicotinamide                |
| NDPK1     | Nucleoside-diphosphate kinase (ATP:GDP)                                | (VBICanLib64949_0292)                                                                                                                                                                                                                                                                                                   | Purine Metabolism                          |
| NDPK2     | Nucleoside-diphosphate kinase (ATP:UDP)                                | (VBICanLib64949_0292)                                                                                                                                                                                                                                                                                                   | Pyrimidine Metabolism                      |

|          |                                                                         |                                                   |                                            |
|----------|-------------------------------------------------------------------------|---------------------------------------------------|--------------------------------------------|
| NDPK3    | Nucleoside-diphosphate kinase<br>(ATP:CDP)                              | (VBICanLib64949_0292)                             | Pyrimidine Metabolism                      |
| NDPK4    | Nucleoside-diphosphate kinase<br>(ATP:dTDP)                             | (VBICanLib64949_0292)                             | Pyrimidine Metabolism                      |
| NDPK5    | Nucleoside-diphosphate kinase<br>(ATP:dGDP)                             | (VBICanLib64949_0292)                             | Purine Metabolism                          |
| NDPK6    | Nucleoside-diphosphate kinase<br>(ATP:dUDP)                             | (VBICanLib64949_0292)                             | Pyrimidine Metabolism                      |
| NDPK7    | Nucleoside-diphosphate kinase<br>(ATP:dCDP)                             | (VBICanLib64949_0292)                             | Pyrimidine Metabolism                      |
| NDPK8    | Nucleoside-diphosphate kinase<br>(ATP:dADP)                             | (VBICanLib64949_0292)                             | Purine Metabolism                          |
| NNATr    | Nicotinate-nucleotide adenylyltransferase                               | (VBICanLib64949_0594)                             | Nicotinate and Nicotinamide                |
| NO2t2rpp | Nitrite transport in via proton symport,<br>reversible (periplasm)      | (VBICanLib64949_0920)                             | Transport                                  |
| OIVD1r   | 2-oxoisovalerate dehydrogenase<br>(acylating; 4-methyl-2-oxopentanoate) | (VBICanLib64949_0986)                             | Valine, leucine and isoleucine degradation |
| OIVD2    | 2-oxoisovalerate dehydrogenase<br>(acylating; 3-methyl-2-oxobutanoate)  | (VBICanLib64949_0986)                             | Valine, leucine and isoleucine degradation |
| OIVD3    | 2-oxoisovalerate dehydrogenase<br>(acylating; 3-methyl-2-oxopentanoate) | (VBICanLib64949_0986)                             | Valine, leucine and isoleucine degradation |
| ORNCD    | Ornithine cyclodeaminase                                                | (VBICanLib64949_1160) or<br>(VBICanLib64949_0975) | Arginine and Proline Metabolism            |
| ORNabcpp | Ornithine transport via ABC system<br>(periplasm)                       | (VBICanLib64949_0058)                             | Lysine Metabolism                          |
| ORPT     | Orotate phosphoribosyltransferase                                       | (VBICanLib64949_0946)                             | Pyrimidine Metabolism                      |
| PANTS    | Pantothenate synthase                                                   | (VBICanLib64949_0621)                             | Pantothenate and CoA Biosynthesis          |
| PDH      | Pyruvate dehydrogenase                                                  | (VBICanLib64949_0566)                             | Glycolysis                                 |
| PDX5POi  | Pyridoxine 5-phosphate oxidase                                          | (VBICanLib64949_1103)                             | Vitamin B6 Metabolism                      |
| PGM      | Phosphoglycerate mutase                                                 | (VBICanLib64949_0170)                             | Gluconeogenesis                            |
| PGMT     | Phosphoglucomutase                                                      | (VBICanLib64949_1041)                             | Glycolysis                                 |
| PIuabcpp | Phosphate transport via ABC system<br>(uptake, periplasm)               | (VBICanLib64949_0537)                             | Transport                                  |
| PMDPHT   | Pyrimidine phosphatase                                                  | (VBICanLib64949_0050)                             | Riboflavin Metabolism                      |
| PPA      | Inorganic diphosphatase                                                 | (VBICanLib64949_0122)                             | Oxidative Phosphorylation                  |

|              |                                                     |                                                                           |                                                |
|--------------|-----------------------------------------------------|---------------------------------------------------------------------------|------------------------------------------------|
| PPBNGS       | Porphobilinogen synthase                            | (VBICanLib64949_0253)                                                     | Porphyrin and Chlorophyll Metabolism           |
| PPPGO        | Protoporphyrinogen oxidase (aerobic)                | (VBICanLib64949_1008)                                                     | Porphyrin and Chlorophyll Metabolism           |
| PRAGSr       | Phosphoribosylglycinamide synthase                  | (VBICanLib64949_0095)                                                     | Purine Metabolism                              |
| PRAIi        | Phosphoribosylanthranilate isomerase (irreversible) | (VBICanLib64949_0019)                                                     | Phenylalanine Tyrosine Tryptophan Biosynthesis |
| PRFGS        | Phosphoribosylformylglycinamidase synthase          | (VBICanLib64949_0899)                                                     | Purine Metabolism                              |
| PSP_L        | Phosphoserine phosphatase (L-serine)                | (VBICanLib64949_0886)                                                     | Glycine, Serine and threonine metabolism       |
| RPE          | Ribulose 5-phosphate 3-epimerase                    | (VBICanLib64949_0904)                                                     | Pentose Phosphate Pathway                      |
| RPI          | Ribose-5-phosphate isomerase                        | (VBICanLib64949_0989)                                                     | Pentose Phosphate Pathway                      |
| SDPTA        | Succinyl-diaminopimelate transaminase               | (VBICanLib64949_0336)                                                     | Lysine Biosynthesis                            |
| SERAT        | Serine O-acetyltransferase                          | (VBICanLib64949_0559)                                                     | Cysteine Metabolism                            |
| SERTRS       | Seryl-tRNA synthetase                               | (VBICanLib64949_0562)                                                     | Glycine, Serine and threonine metabolism       |
| SHCHF        | Sirohydrochlorin ferrochelatase                     | (VBICanLib64949_0631)                                                     | Porphyrin and Chlorophyll Metabolism           |
| SOTA         | Succinylornithine transaminase                      | (VBICanLib64949_0336)                                                     | Arginine and Proline Metabolism                |
|              |                                                     | (VBICanLib64949_0978) and (VBICanLib64949_0979) and (VBICanLib64949_0977) |                                                |
| SUCD1        | Succinate dehydrogenase                             |                                                                           | TCA Cycle                                      |
|              | Sulfate transport via ABC system (periplasm)        | (VBICanLib64949_0811)                                                     | Sulfur Metabolism                              |
| SULabcpp     |                                                     |                                                                           |                                                |
| TRSARr       | Tartronate semialdehyde reductase                   | (VBICanLib64949_0525)                                                     | Glycolate metabolism                           |
|              | Thiosulfate transport via ABC system (periplasm)    | (VBICanLib64949_0686) or (VBICanLib64949_0239)                            | Sulfur Metabolism                              |
| TSULabcpp    |                                                     |                                                                           |                                                |
| UDCPDP       | Undecaprenyl-diphosphatase                          | (VBICanLib64949_0651)                                                     | Peptidoglycan Biosynthesis                     |
| UMPk         | UMP kinase                                          | (VBICanLib64949_045)                                                      | Pyrimidine Metabolism                          |
| UPPN         | B-ureidopropionase                                  | (VBICanLib64949_1031)                                                     | Pantothenate and CoA Biosynthesis              |
| UREA         | Urease                                              | (VBICanLib64949_0803)                                                     | Urea cycle/amino group metabolism              |
| VALTRS       | Valyl-tRNA synthetase                               | (VBICanLib64949_0854)                                                     | Valine, Leucine, and Isoleucine Metabolism     |
| VANKpp       | VANKpp                                              | (VBICanLib64949_0896)                                                     | Transport                                      |
| VANLNtex     | VANLNtex                                            | (VBICanLib64949_0896)                                                     | Transport                                      |
| VANLTtex     | VANLTtex                                            | (VBICanLib64949_0896)                                                     | Transport                                      |
| VNLNpp       | VNLNpp                                              | (VBICanLib64949_0896)                                                     | Transport                                      |
| pentso3abcpp | Pentso3abcpp                                        | (VBICanLib64949_0648)                                                     | Transport                                      |

|               |                                                                                                             |                                                                                                                                                                          |                                             |
|---------------|-------------------------------------------------------------------------------------------------------------|--------------------------------------------------------------------------------------------------------------------------------------------------------------------------|---------------------------------------------|
|               |                                                                                                             | (VBICanLib64949_0295) and<br>(VBICanLib64949_0496) or<br>(VBICanLib64949_0708) or<br>(VBICanLib64949_0686) or<br>(VBICanLib64949_0018) or<br>(VBICanLib64949_0538)       | Lipopolysaccharide Biosynthesis / Recycling |
| ACOLIPAabctex | Arabinose modified core oligosaccharide<br>lipid A transport via ABC system<br>(periplasm to extracellular) | (VBICanLib64949_0249)                                                                                                                                                    | Cofactor and Prosthetic Group Biosynthesis  |
| ALATA_D2      | D-alanine transaminase                                                                                      | (VBICanLib64949_0249)                                                                                                                                                    | Cofactor and Prosthetic Group Biosynthesis  |
| ALATA_L2      | Alanine transaminase                                                                                        | (VBICanLib64949_0294)                                                                                                                                                    | Cysteine Metabolism                         |
| AMPTASECG     | Alanyl aminopeptidase (cys-gly)                                                                             | (VBICanLib64949_0294)                                                                                                                                                    | Arginine and Proline Metabolism             |
| AMPTASEPG     | Aminopeptidase (pro-gly)                                                                                    | ((VBICanLib64949_1106) and<br>(VBICanLib64949_0057) and<br>(VBICanLib64949_0056) and<br>(VBICanLib64949_1046) and<br>(VBICanLib64949_1046))                              | Transport, Inner Membrane                   |
| ASCBptspp     | L-ascorbate transport via PEP:Pyr PTS<br>(periplasm)                                                        | ((VBICanLib64949_0648) and<br>(VBICanLib64949_0647) and<br>(VBICanLib64949_0240))                                                                                        | Transport, Inner Membrane                   |
| BUTSO3abcpp   | Butanesulfonate transport via ABC system<br>(periplasm)                                                     | ((VBICanLib64949_0513) and<br>(VBICanLib64949_0295) and<br>(VBICanLib64949_0496) and<br>(VBICanLib64949_0495) and<br>(VBICanLib64949_0297) and<br>(VBICanLib64949_0351)) | Lipopolysaccharide Biosynthesis / Recycling |
| CLIPAabctex   | Cold lipid A transport via ABC system<br>(periplasm to extracellular)                                       | ((VBICanLib64949_0295) and<br>(VBICanLib64949_0495) and<br>(VBICanLib64949_0496))                                                                                        | Lipopolysaccharide Biosynthesis / Recycling |
| COLIPAPabctex | Core oligosaccharide lipid A diphosphate<br>transport via ABC system (periplasm to<br>extracellular)        | ((VBICanLib64949_0295) and<br>(VBICanLib64949_0495) and<br>(VBICanLib64949_0496))                                                                                        | Lipopolysaccharide Biosynthesis / Recycling |
| COLIPAabctex  | Core oligosaccharide lipid A transport via<br>ABC system (periplasm to extracellular)                       | ((VBICanLib64949_0239) and<br>(VBICanLib64949_0240))                                                                                                                     | Transport, Inner Membrane                   |
| CRNDabcpp     | D-carnitine transport via ABC system<br>(periplasm)                                                         | ((VBICanLib64949_1026) or<br>(VBICanLib64949_0997))                                                                                                                      | Cysteine Metabolism                         |
| CYSSADS       | L-cysteine sulfinic acid desulfurase                                                                        |                                                                                                                                                                          |                                             |



|                      |                                                                                                                        |                                                                                                                                                                                                                                                                                                                                                                           |                                             |
|----------------------|------------------------------------------------------------------------------------------------------------------------|---------------------------------------------------------------------------------------------------------------------------------------------------------------------------------------------------------------------------------------------------------------------------------------------------------------------------------------------------------------------------|---------------------------------------------|
| ECA4COLIPAabc<br>tex | Enterobacterial common antigen (x4) core oligosaccharide lipid A transport via ABC system (periplasm to extracellular) | ((VBICanLib64949_0495) and (VBICanLib64949_0513) and (VBICanLib64949_0496) and (VBICanLib64949_0295))                                                                                                                                                                                                                                                                     | Lipopolysaccharide Biosynthesis / Recycling |
| ENLIPAabctex         | Phosphoethanolamine lipid A transport via ABC system (periplasm to extracellular)                                      | ((VBICanLib64949_0496) and (VBICanLib64949_0295) and (VBICanLib64949_0495))                                                                                                                                                                                                                                                                                               | Lipopolysaccharide Biosynthesis / Recycling |
| GRXR                 | Glutaredoxin reductase                                                                                                 | (VBICanLib64949_0897)                                                                                                                                                                                                                                                                                                                                                     | Unassigned                                  |
| K2L4Aabctex          | KDO(2)-lipid IV A transport via ABC system (periplasm to extracellular)                                                | (VBICanLib64949_0837)                                                                                                                                                                                                                                                                                                                                                     | Lipopolysaccharide Biosynthesis / Recycling |
| KAS15                | Beta-ketoacyl-ACP synthase (2)                                                                                         | (VBICanLib64949_0713)                                                                                                                                                                                                                                                                                                                                                     | Membrane Lipid Metabolism                   |
| KDOPS                | 3-deoxy -D-manno-octulosonic -acid 8-phosphate synthase                                                                | (VBICanLib64949_0745)                                                                                                                                                                                                                                                                                                                                                     | Lipopolysaccharide Biosynthesis / Recycling |
| LIPAabctex           | Lipid A transport via ABC system (periplasm to extracellular)                                                          | (VBICanLib64949_0496)                                                                                                                                                                                                                                                                                                                                                     | Lipopolysaccharide Biosynthesis / Recycling |
| NADH17pp             | NADH dehydrogenase (menaquinone-8 & 3 protons) (periplasm)                                                             | ((VBICanLib64949_0770) and (VBICanLib64949_0771) and (VBICanLib64949_0772) and (VBICanLib64949_0773) and (VBICanLib64949_0774) and (VBICanLib64949_0775) and (VBICanLib64949_0776) and (VBICanLib64949_0777) and (VBICanLib64949_0778) and (VBICanLib64949_0779) and (VBICanLib64949_0780) and (VBICanLib64949_0781) and (VBICanLib64949_0782) and (VBICanLib64949_0783)) | Oxidative Phosphorylation                   |

|               |                                                                                                           |                                                                                                                                                                                                                                                                                                                                                                                                                |                                             |
|---------------|-----------------------------------------------------------------------------------------------------------|----------------------------------------------------------------------------------------------------------------------------------------------------------------------------------------------------------------------------------------------------------------------------------------------------------------------------------------------------------------------------------------------------------------|---------------------------------------------|
|               |                                                                                                           | (VBICanLib64949_0770) and<br>(VBICanLib64949_0771) and<br>(VBICanLib64949_0772) and<br>(VBICanLib64949_0773) and<br>(VBICanLib64949_0774) and<br>(VBICanLib64949_0775) and<br>(VBICanLib64949_0776) and<br>(VBICanLib64949_0777) and<br>(VBICanLib64949_0778) and<br>(VBICanLib64949_0779) and<br>(VBICanLib64949_0780) and<br>(VBICanLib64949_0781) and<br>(VBICanLib64949_0782) and<br>(VBICanLib64949_0783) | Oxidative Phosphorylation                   |
| NADH18pp      | NADH dehydrogenase<br>(demethylmenaquinone-8 & 3 protons)<br>(periplasm)                                  | (VBICanLib64949_0589)                                                                                                                                                                                                                                                                                                                                                                                          | Metabolite Repair                           |
| NADHHR        | NADH hydratase                                                                                            | (VBICanLib64949_0589)                                                                                                                                                                                                                                                                                                                                                                                          | Metabolite Repair                           |
| NADHHS        | NADH hydratase                                                                                            | (VBICanLib64949_0589)                                                                                                                                                                                                                                                                                                                                                                                          | Metabolite Repair                           |
| NADPHHR       | NADPH hydratase                                                                                           | (VBICanLib64949_0589)                                                                                                                                                                                                                                                                                                                                                                                          | Metabolite Repair                           |
| NADPHHS       | NADPH hydratase                                                                                           | (VBICanLib64949_0589)                                                                                                                                                                                                                                                                                                                                                                                          | Metabolite Repair                           |
| O16A4COLIPAab | O16 antigen (x4) core oligosaccharide<br>lipid A transport via ABC system<br>(periplasm to extracellular) | (VBICanLib64949_0494) and<br>(VBICanLib64949_0495) and<br>(VBICanLib64949_0496)                                                                                                                                                                                                                                                                                                                                | Lipopolysaccharide Biosynthesis / Recycling |
| ctex          |                                                                                                           | (VBICanLib64949_0484)                                                                                                                                                                                                                                                                                                                                                                                          | Cofactor and Prosthetic Group Biosynthesis  |
| OCTDPS        | Octaprenyl pyrophosphate synthase                                                                         |                                                                                                                                                                                                                                                                                                                                                                                                                |                                             |
| OMBZLM        | 2-Octaprenyl-6-methoxy-benzoquinol<br>methylase                                                           | (VBICanLib64949_0484)                                                                                                                                                                                                                                                                                                                                                                                          | Cofactor and Prosthetic Group Biosynthesis  |
|               |                                                                                                           | (VBICanLib64949_0741) and<br>(VBICanLib64949_0014)) or<br>(VBICanLib64949_0074) or<br>(VBICanLib64949_0075) or<br>(VBICanLib64949_0765) or<br>(VBICanLib64949_0893) or<br>(VBICanLib64949_0939)                                                                                                                                                                                                                |                                             |
| RNDR3b        | Ribonucleoside-diphosphate reductase<br>(CDP) (glutaredoxin)                                              |                                                                                                                                                                                                                                                                                                                                                                                                                | Nucleotide Salvage Pathway                  |
| RNDR4b        | Ribonucleoside-diphosphate reductase<br>(UDP) (glutaredoxin)                                              | (VBICanLib64949_0471)                                                                                                                                                                                                                                                                                                                                                                                          | Nucleotide Salvage Pathway                  |
|               |                                                                                                           | (VBICanLib64949_0928) and<br>(VBICanLib64949_0996) and<br>(VBICanLib64949_0997) and<br>(VBICanLib64949_0995)                                                                                                                                                                                                                                                                                                   |                                             |
| S2FE2SR       | SUF [2Fe-2S] regeneration                                                                                 |                                                                                                                                                                                                                                                                                                                                                                                                                | Cofactor and Prosthetic Group Biosynthesis  |

|               |                                                            |                                                                                                     |                                            |
|---------------|------------------------------------------------------------|-----------------------------------------------------------------------------------------------------|--------------------------------------------|
| S2FE2SS       | SUF [2Fe-2S] Synthesis                                     | (VBICanLib64949_0928) and (VBICanLib64949_0996) and (VBICanLib64949_0997) and (VBICanLib64949_0995) | Cofactor and Prosthetic Group Biosynthesis |
| S2FE2SS2      | SUF [2Fe-2S] Synthesis II                                  | (VBICanLib64949_0928) and (VBICanLib64949_0996) and (VBICanLib64949_0997) and (VBICanLib64949_0995) | Cofactor and Prosthetic Group Biosynthesis |
| S2FE2ST       | SUF [2Fe-2S] Transfer                                      | (VBICanLib64949_0928) and (VBICanLib64949_0996) and (VBICanLib64949_0997) and (VBICanLib64949_0995) | Cofactor and Prosthetic Group Biosynthesis |
| S4FE4SR       | SUF [4Fe-4S] Reduction                                     | (VBICanLib64949_0928) and (VBICanLib64949_0996) and (VBICanLib64949_0997) and (VBICanLib64949_0995) | Cofactor and Prosthetic Group Biosynthesis |
| S4FE4ST       | SUF [4Fe-4S] Transfer                                      | (VBICanLib64949_0995)                                                                               | Cofactor and Prosthetic Group Biosynthesis |
| SCYSDS        | SUF Cysteine desulfuration                                 | (VBICanLib64949_0997)                                                                               | Cofactor and Prosthetic Group Biosynthesis |
| FEex          | Iron transporter                                           | ((VBICanLib64949_0837) and (VBICanLib64949_0668)) or (VBICanLib64949_0081)                          | iron metabolism                            |
| FEpp          | Iron transporter                                           | ((VBICanLib64949_0668) and (VBICanLib64949_0837))                                                   | iron metabolism                            |
| Kt3pp         | Potassium transport out via proton antiport (periplasm)    | (VBICanLib64949_0844) or (VBICanLib64949_0896)                                                      | Inorganic Ion Transport and Metabolism     |
| 2DHGLCNkt_tpp | 2DHGLCNkt tpp                                              | (AL011_03585)                                                                                       | Transport                                  |
| 3HAD100       | 3-hydroxyacyl-[acyl-carrier-protein] dehydratase (n-C10:0) | ((AL011_01705) and (AL011_01700) and (AL011_01690) and (AL011_01695))                               | Fatty Acid Biosynthesis                    |
| 3HAD120       | 3-hydroxyacyl-[acyl-carrier-protein] dehydratase (n-C12:0) | ((AL011_02125) and (AL011_01630))                                                                   | Fatty Acid Biosynthesis                    |
| 3HAD121       | 3-hydroxyacyl-[acyl-carrier-protein] dehydratase (n-C12:1) | ((AL011_01035) and (AL011_01040))                                                                   | Fatty Acid Biosynthesis                    |
| 3HAD141       | 3-hydroxyacyl-[acyl-carrier-protein] dehydratase (n-C14:1) | ((AL011_02125) and (AL011_01630))                                                                   | Fatty Acid Biosynthesis                    |

|         |                                                            |                                                                                       |                                            |
|---------|------------------------------------------------------------|---------------------------------------------------------------------------------------|--------------------------------------------|
| 3HAD161 | 3-hydroxyacyl-[acyl-carrier-protein] dehydratase (n-C16:1) | ((AL011_01630) and (AL011_02125))                                                     | Fatty Acid Biosynthesis                    |
| 3HAD80  | 3-hydroxyacyl-[acyl-carrier-protein] dehydratase (n-C8:0)  | ((AL011_01630) and (AL011_02125))                                                     | Fatty Acid Biosynthesis                    |
| 3OAR120 | 3-oxoacyl-[acyl-carrier-protein] reductase (n-C12:0)       | (AL011_03290) or (AL011_01020) or (AL011_01640)                                       | Fatty Acid Biosynthesis                    |
| 3OAR121 | 3-oxoacyl-[acyl-carrier-protein] reductase (n-C12:1)       | (AL011_03290) or (AL011_01020) or (AL011_01640)                                       | Fatty Acid Biosynthesis                    |
| 3OAR141 | 3-oxoacyl-[acyl-carrier-protein] reductase (n-C14:1)       | (AL011_03290) or (AL011_01020) or (AL011_01640)                                       | Fatty Acid Biosynthesis                    |
| 3OAR181 | 3-oxoacyl-[acyl-carrier-protein] reductase (n-C18:1)       | (AL011_03290) or (AL011_01020) or (AL011_01640)                                       | Fatty Acid Biosynthesis                    |
| 3OAR40  | 3-oxoacyl-[acyl-carrier-protein] reductase (n-C4:0)        | (AL011_03290) or (AL011_01020) or (AL011_01640)                                       | Fatty Acid Biosynthesis                    |
| 3OAS141 | 3-oxoacyl-[acyl-carrier-protein] synthase (n-C14:1)        | (AL011_01635) or (AL011_03300)                                                        | Fatty Acid Biosynthesis                    |
| 3OAS181 | 3-oxoacyl-[acyl-carrier-protein] synthase (n-C18:1)        | ((AL011_03300) and (AL011_03470) and (AL011_01780)) or (AL011_01635) or (AL011_01780) | Fatty Acid Biosynthesis                    |
| 3OAS60  | 3-oxoacyl-[acyl-carrier-protein] synthase (n-C6:0)         | ((AL011_04825) or (AL011_04680))                                                      | Fatty Acid Biosynthesis                    |
| 4HTHRS  | 4-Hydroxy-L-threonine synthase                             | (AL011_01655)                                                                         | Vitamin B6 Metabolism                      |
| ACCOAC  | Acetyl-CoA carboxylase                                     | ((AL011_01875) and (AL011_00660) and (AL011_03040) and (AL011_00665))                 | Fatty Acid Biosynthesis                    |
| ACGS    | N-acetylglutamate synthase                                 | ((AL011_01755) or (AL011_00965))                                                      | Urea cycle/amino group metabolism          |
| ACHBS   | 2-aceto-2-hydroxybutanoate synthase                        | (AL011_00030)                                                                         | Valine, Leucine, and Isoleucine Metabolism |
| ACOATA  | Acetyl-CoA ACP transacylase                                | ((AL011_01610) or (AL011_02090))                                                      | Fatty Acid Biosynthesis                    |
| ACONT   | Aconitate hydratase                                        | (AL011_01575)                                                                         | TCA Cycle                                  |
| ACONTa  | Aconitase (half-reaction A, Citrate hydro-lyase)           | (AL011_01080) or (AL011_04680)                                                        | TCA Cycle                                  |
| ACONTb  | Aconitase (half-reaction B, Isocitrate hydro-lyase)        | (AL011_01575)                                                                         | TCA Cycle                                  |
| ACOTA   | Acetylornithine transaminase                               | ((AL011_01485) and (AL011_01775))                                                     | Urea cycle/amino group metabolism          |
| ADSL1r  | Adenylosuccinate lyase                                     | (AL011_04250)                                                                         | Purine Metabolism                          |
| ADSL2r  | Adenylosuccinate lyase                                     | (AL011_04250) or (AL011_00280) or (AL011_01180)                                       | Purine Metabolism                          |

|          |                                                                       |                                                                                                                            |                                                |
|----------|-----------------------------------------------------------------------|----------------------------------------------------------------------------------------------------------------------------|------------------------------------------------|
| AGPAT120 | 1-tetradecanoyl-sn-glycerol 3-phosphate O-acyltransferase (n-C12:0)   | (AL011_03075)                                                                                                              | Glycerophospholipid Metabolism                 |
| AGPAT160 | 1-hexadecanoyl-sn-glycerol 3-phosphate O-acyltransferase (n-C16:0)    | (AL011_03075)                                                                                                              | Glycerophospholipid Metabolism                 |
| AGPAT161 | 1-hexadec-7-enoyl-sn-glycerol 3-phosphate O-acyltransferase (n-C16:1) | (AL011_03075)                                                                                                              | Glycerophospholipid Metabolism                 |
| AGPAT180 | 1-octadecanoyl-sn-glycerol 3-phosphate O-acyltransferase (n-C18:0)    | (AL011_03075)                                                                                                              | Glycerophospholipid Metabolism                 |
| AGPAT181 | 1-octadec-7-enoyl-sn-glycerol 3-phosphate O-acyltransferase (n-C18:1) | (AL011_03075)                                                                                                              | Glycerophospholipid Metabolism                 |
| AICART   | Phosphoribosylaminoimidazolecarboxamide formyltransferase             | (AL011_02645)                                                                                                              | Purine Metabolism                              |
| AKGDH    | 2-Oxoglutarate dehydrogenase                                          | ((AL011_00525) or (AL011_01275))                                                                                           | TCA Cycle                                      |
| ALAALAr  | D-alanine-D-alanine ligase (reversible)                               | ((AL011_05235))                                                                                                            | Peptidoglycan Biosynthesis                     |
| ANPRT    | Anthranilate phosphoribosyltransferase                                | (AL011_01395)                                                                                                              | Phenylalanine Tyrosine Tryptophan Biosynthesis |
| ANS      | Anthranilate synthase                                                 | (AL011_01395)                                                                                                              | Phenylalanine Tyrosine Tryptophan Biosynthesis |
| ARGSL    | Argininosuccinate lyase                                               | ((AL011_00745) and (AL011_01865)) or (AL011_00745)                                                                         | Arginine and Proline Metabolism                |
| ARGSS    | Argininosuccinate synthase                                            | (AL011_00495)                                                                                                              | Arginine and Proline Metabolism                |
| ARGabcpp | L-arginine transport via ABC system (periplasm)                       | (AL011_00015)                                                                                                              | Transport                                      |
| ASAD     | Aspartate-semialdehyde dehydrogenase                                  | (AL011_00860)                                                                                                              | Lysine Biosynthesis                            |
| ASNS1    | Asparagine synthase (glutamine-hydrolysing)                           | (AL011_01015)                                                                                                              | Alanine and Aspartate Metabolism               |
| ASPabcpp | L-aspartate transport via ABC system (periplasm)                      | ((AL011_00185) and (AL011_00180) and (AL011_04930) and (AL011_04930)) or (AL011_01180)                                     | Transport                                      |
| ATPPRT   | ATP phosphoribosyltransferase                                         | (AL011_01655)                                                                                                              | Histidine Metabolism                           |
| ATPS4rpp | ATP synthase (four protons for one ATP) (periplasm)                   | ((AL011_02880) and (AL011_02895) and (AL011_04810) and (AL011_02885) and (AL011_02875) and (AL011_02890)) or (AL011_03480) | Oxidative Phosphorylation                      |
| BZt1pp   | Benzoate transport in via proton symport (periplasm)                  | (AL011_01265)                                                                                                              | B-Ketoadipate pathway                          |

|            |                                                              |                                                                                                        |                                                |
|------------|--------------------------------------------------------------|--------------------------------------------------------------------------------------------------------|------------------------------------------------|
| CHLabcpp   | Choline transport via ABC system (periplasm)                 | ((AL011_01040) and (AL011_01035)) or (AL011_02465) or (AL011_03000) or (AL011_03175)                   | Transport                                      |
| CHOLS_ex   | CHOLS LPAREN ex RPAREN                                       | (AL011_01655)                                                                                          | Transport                                      |
| DAPE       | Diaminopimelate epimerase                                    | (AL011_02430)                                                                                          | Lysine Biosynthesis                            |
| CHOLSabc   | CHOLSabc                                                     | ((AL011_01045) and (AL011_01040) and (AL011_01035)) or (AL011_02465) or (AL011_03000) or (AL011_03175) | Glycine, Serine and threonine metabolism       |
| CITtex     | Citrate transport via diffusion (extracellular to periplasm) | (AL011_03930)                                                                                          | Transport                                      |
| COBALT2tpp | Cobalt transport in via permease (no H+)                     | (AL011_02995)                                                                                          | Transport                                      |
| CS         | Citrate synthase                                             | ((AL011_01035) and (AL011_01040))                                                                      | TCA Cycle                                      |
| CTPS2      | CTP synthase (glutamine)                                     | ((AL011_01035) and (AL011_01040))                                                                      | Pyrimidine Metabolism                          |
| CYO1b      | CYO1b                                                        | ((AL011_01700) and (AL011_01705))                                                                      | Oxidative Phosphorylation                      |
| CYSabcpp   | L-cysteine uptake via ABC system (periplasm)                 | (AL011_03470)                                                                                          | Transport                                      |
| CYTBO3_4pp | Cytochrome oxidase bo3 (ubiquinol-8: 4 protons) (periplasm)  | ((AL011_01705) and (AL011_01695) and (AL011_01690) and (AL011_01700))                                  | Oxidative Phosphorylation                      |
| DAPDC      | Diaminopimelate decarboxylase                                | (AL011_01185)                                                                                          | Lysine Biosynthesis                            |
| DASYN120   | CDP-diacylglycerol synthetase (n-C12:0)                      | (AL011_02105)                                                                                          | Glycerophospholipid Metabolism                 |
| DASYN160   | CDP-diacylglycerol synthetase (n-C16:0)                      | (AL011_02105)                                                                                          | Glycerophospholipid Metabolism                 |
| DASYN161   | CDP-diacylglycerol synthetase (n-C16:1)                      | (AL011_02105)                                                                                          | Glycerophospholipid Metabolism                 |
| DASYN180   | CDP-diacylglycerol synthetase (n-C18:0)                      | (AL011_02105)                                                                                          | Glycerophospholipid Metabolism                 |
| DASYN181   | CDP-diacylglycerol synthetase (n-C18:1)                      | (AL011_02105)                                                                                          | Glycerophospholipid Metabolism                 |
| DB4PS      | 3,4-Dihydroxy-2-butanone-4-phosphate synthase                | (AL011_04735)                                                                                          | Riboflavin Metabolism                          |
| DDPA       | 3-deoxy-D-arabino-heptulosonate 7-phosphate synthetase       | (AL011_02630)                                                                                          | Phenylalanine Tyrosine Tryptophan Biosynthesis |
| DGK1       | Deoxyguanylate kinase (dGMP:ATP)                             | ((AL011_01875) and (AL011_00660) and (AL011_00665) and (AL011_03040))                                  | Purine Metabolism                              |

|             |                                                          |                                                                        |                                   |
|-------------|----------------------------------------------------------|------------------------------------------------------------------------|-----------------------------------|
| DHPM1       | Dihydropyrimidinase (5,6-dihydrouracil)                  | (AL011_00835)                                                          | Pantothenate and CoA Biosynthesis |
| DMATT       | Dimethylallyltranstransferase                            | (AL011_04925) or (AL011_02220)                                         | Steroid biosynthesis              |
| DNAMTn2r    | DNA (cytosine-5-)-methyltransferase                      | (AL011_03385) or (AL011_03380)                                         | Methionine Metabolism             |
| DNTPPA      | Dihydroneopterin triphosphate pyrophosphatase            | (AL011_00960)                                                          | Folate Biosynthesis               |
| DPCOAK      | Dephospho-CoA kinase                                     | (AL011_01880)                                                          | Pantothenate and CoA Biosynthesis |
| DPR         | 2-dehydropantoate 2-reductase                            | (AL011_04865)                                                          | Pantothenate and CoA Biosynthesis |
| DTMPK       | DTMP kinase                                              | (AL011_00415)                                                          | Pyrimidine Metabolism             |
| DURAD       | Dihydrouracil dehydrogenase (NADP)                       | (AL011_01495)                                                          | Pantothenate and CoA Biosynthesis |
| DUTPDP      | DUTP diphosphatase                                       | (AL011_04510)                                                          | Pyrimidine Metabolism             |
| DXPS        | 1-deoxy-D-xylulose 5-phosphate synthase                  | (AL011_02610)                                                          | Steroid biosynthesis              |
| E4PD        | Erythrose 4-phosphate dehydrogenase                      | ((AL011_02690) and (AL011_02690))                                      | Vitamin B6 Metabolism             |
| EAR100y     | Enoyl-[acyl-carrier-protein] reductase (NADPH) (n-C10:0) | (AL011_01640) or (AL011_05175)                                         | Fatty Acid Biosynthesis           |
| EAR120y     | Enoyl-[acyl-carrier-protein] reductase (NADPH) (n-C12:0) | ((AL011_01035) and (AL011_01040))                                      | Fatty Acid Biosynthesis           |
| EAR121y     | Enoyl-[acyl-carrier-protein] reductase (NADPH) (n-C12:1) | ((AL011_01035) and (AL011_01040))                                      | Fatty Acid Biosynthesis           |
| EAR160y     | Enoyl-[acyl-carrier-protein] reductase (NADPH) (n-C16:0) | ((AL011_02465) and (AL011_01040)) or ((AL011_01035) and (AL011_01040)) | Fatty Acid Biosynthesis           |
| EAR161y     | Enoyl-[acyl-carrier-protein] reductase (NADPH) (n-C16:1) | (AL011_01640) or (AL011_05175)                                         | Fatty Acid Biosynthesis           |
| EAR180y     | Enoyl-[acyl-carrier-protein] reductase (NADPH) (n-C18:0) | (AL011_01640) or (AL011_05175)                                         | Fatty Acid Biosynthesis           |
| EAR181y     | Enoyl-[acyl-carrier-protein] reductase (NADPH) (n-C18:1) | (AL011_01640) or (AL011_05175)                                         | Fatty Acid Biosynthesis           |
| EAR40y      | Enoyl-[acyl-carrier-protein] reductase (NADPH) (n-C4:0)  | (AL011_01640) or (AL011_05175)                                         | Fatty Acid Biosynthesis           |
| EAR60y      | Enoyl-[acyl-carrier-protein] reductase (NADPH) (n-C6:0)  | (AL011_01640) or (AL011_05175)                                         | Fatty Acid Biosynthesis           |
| EAR80y      | Enoyl-[acyl-carrier-protein] reductase (NADPH) (n-C8:0)  | (AL011_01640) or (AL011_05175)                                         | Fatty Acid Biosynthesis           |
| ETHSO3abcpp | Ethanesulfonate transport via ABC system (periplasm)     | ((AL011_02995) and (AL011_03000) and (AL011_03665))                    | Transport                         |

|           |                                                                     |                                                                      |                                      |
|-----------|---------------------------------------------------------------------|----------------------------------------------------------------------|--------------------------------------|
| FDH       | Formate dehydrogenase                                               | ((AL011_03665) and (AL011_03660) and (AL011_03655))                  | Methane Metabolism                   |
| FE2abc    | Iron (II) transport via ABC system                                  | (AL011_01035) or ((AL011_03175) and (AL011_03170) and (AL011_03155)) | Transport                            |
| FERtex    | FERtex                                                              | (AL011_02275)                                                        | Transport                            |
| FERtpp    | FERtpp                                                              | (AL011_02275)                                                        | Transport                            |
| FTHFD     | Formyltetrahydrofolate deformylase                                  | ((AL011_02685) or (AL011_02685))                                     | One Carbon pool by folate            |
| FUM       | Fumarase                                                            | ((AL011_00525) or (AL011_01275))                                     | TCA Cycle                            |
| FUMtex    | Fumarate transport via diffusion (extracellular to periplasm)       | (AL011_00280)                                                        | Transport                            |
| G1SAT     | Glutamate-1-semialdehyde aminotransferase                           | (AL011_01485)                                                        | Porphyrin and Chlorophyll Metabolism |
| G3PAT120  | Glycerol-3-phosphate acyltransferase (C12:0)                        | (AL011_03295)                                                        | Glycerophospholipid Metabolism       |
| G3PAT160  | Glycerol-3-phosphate acyltransferase (C16:0)                        | (AL011_03295)                                                        | Glycerophospholipid Metabolism       |
| G3PAT161  | Glycerol-3-phosphate acyltransferase (C16:1)                        | (AL011_03295)                                                        | Glycerophospholipid Metabolism       |
| G3PAT180  | Glycerol-3-phosphate acyltransferase (C18:0)                        | (AL011_03295)                                                        | Glycerophospholipid Metabolism       |
| G3PAT181  | Glycerol-3-phosphate acyltransferase (C18:1)                        | (AL011_03295)                                                        | Glycerophospholipid Metabolism       |
| GART      | GAR transformylase-T                                                | (AL011_00125)                                                        | Purine Metabolism                    |
| GLCNt2rpp | D-gluconate transport via proton symport, reversible (periplasm)    | (AL011_01085)                                                        | Transport                            |
| GLCabcpp  | D-glucose transport via ABC system (periplasm)                      | (AL011_00190) or (AL011_01035) or (AL011_03175)                      | Transport                            |
| GLNS      | Glutamine synthetase                                                | (AL011_00190) or (AL011_03000)                                       | Glutamate Metabolism                 |
| GLNTRAT   | Glutamyl-tRNA(Gln) amidotransferase                                 | ((AL011_04265) and (AL011_04275) and (AL011_04270))                  | Glutamate Metabolism                 |
| GLUSy     | Glutamate synthase (NADPH)                                          | (AL011_00745)                                                        | Glutamate Metabolism                 |
| GLUt4pp   | Na <sup>+</sup> /glutamate symport (periplasm)                      | (AL011_04210)                                                        | Transport                            |
| GLXCL     | Glyoxalate carboligase                                              | (AL011_00810) or (AL011_02615)                                       | Glycolate metabolism                 |
| GLYALDtex | Glyceraldehyde transport via diffusion (extracellular to periplasm) | (AL011_01825) or (AL011_00185)                                       | Transport                            |



|             |                                                                   |                                                                                                    |                                             |
|-------------|-------------------------------------------------------------------|----------------------------------------------------------------------------------------------------|---------------------------------------------|
| GLYBabcpp   | Glycine betaine transport via ABC system (periplasm)              | (AL011_01265)                                                                                      | Arginine and Proline Metabolism             |
| GLYCK       | Glycerate kinase                                                  | (AL011_03970)                                                                                      | Glycine, Serine and threonine metabolism    |
| GLYCL       | Glycine Cleavage System                                           | (AL011_02600) or (AL011_04640) or (AL011_04650) or (AL011_02600) or (AL011_04640) or (AL011_04650) | Glycine, Serine and threonine metabolism    |
| GLYCLTt2rpp | Glycolate transport via proton symport, reversible (periplasm)    | (AL011_04650) or (AL011_02600) or (AL011_04640) or (AL011_04650)                                   | Transport                                   |
| GLYCLTtex   | Glycolate transport via diffusion (extracellular to periplasm)    | (AL011_02600) or (AL011_04640) or (AL011_04650) or (AL011_02600) or (AL011_04640) or (AL011_04650) | Transport                                   |
| GLYCL_2     | Glycine cleavage system, cytosol                                  | (AL011_04640) or (AL011_04650)                                                                     | Nitrogen Metabolism                         |
| GLYCTO1     | Glycolate oxidase                                                 | (AL011_02185)                                                                                      | Glycolate metabolism                        |
| GLYTRS      | Glycyl-tRNA synthetase                                            | ((AL011_04835) and (AL011_02210))                                                                  | Glycine, Serine and threonine metabolism    |
| GMPS2       | GMP synthase                                                      | (AL011_02210)                                                                                      | Purine Metabolism                           |
| GND         | Phosphogluconate dehydrogenase                                    | (AL011_02400)                                                                                      | Pentose Phosphate Pathway                   |
| GRTT        | Geranyltranstransferase                                           | (AL011_04925) or (AL011_02220)                                                                     | Steroid biosynthesis                        |
| GTHPi       | Glutathione peridoxase                                            | (AL011_05400)                                                                                      | Glutathione Metabolism                      |
| GTHS        | Glutathione synthetase                                            | ((AL011_04935) and (AL011_04930) and (AL011_00190))                                                | Glutamate Metabolism                        |
| GTPCII      | GTP cyclohydrolase II                                             | (AL011_01125)                                                                                      | Riboflavin Metabolism                       |
| HCO3_NAt    | Bicarbonate transport (Na/HCO3 cotransport)                       | (AL011_04010)                                                                                      | Transport                                   |
| HEMEOS      | Heme O synthase                                                   | (AL011_01130)                                                                                      | Porphyrin and Chlorophyll Metabolism        |
| HISabcpp    | L-histidine transport via ABC system (periplasm)                  | (AL011_01040) and (AL011_02155)                                                                    | Transport                                   |
| HMBS        | Hydroxymethylbilane synthase                                      | (AL011_04565)                                                                                      | Porphyrin and Chlorophyll Metabolism        |
| HMGL        | Hydroxymethylglutaryl-CoA lyase                                   | (AL011_00295)                                                                                      | Synthesis and degradation of Ketones Bodies |
| HPPK        | 2-amino-4-hydroxy-6-hydroxymethyldihydropteridine diphosphokinase | (34021.12.peg.1110)                                                                                | Folate Biosynthesis                         |
| HXAAtex     | Hexanoate transport via diffusion (extracellular to periplasm)    | (AL011_04010)                                                                                      | Transport                                   |

|           |                                                                           |                                 |                                                |
|-----------|---------------------------------------------------------------------------|---------------------------------|------------------------------------------------|
| ICDHyr    | Isocitrate dehydrogenase (NADP)<br>Citrate transport via diffusion        | (AL011_03900)                   | TCA Cycle                                      |
| ICITtex   | extracellular to periplasm                                                | (AL011_04215)                   | Transport                                      |
| ICL       | Isocitrate lyase                                                          | (AL011_01725)                   | TCA Cycle                                      |
| IGPS      | Indole-3-glycerol-phosphate synthase                                      | (AL011_00030)                   | Phenylalanine Tyrosine Tryptophan Biosynthesis |
| ILEabcpp  | L-isoleucine transport via ABC system<br>(periplasm)                      | (AL011_04215)                   | Transport                                      |
| IMPD      | IMP dehydrogenase                                                         | (AL011_03830)                   | Purine Metabolism                              |
| IPDDI     | Isopentenyl-diphosphate D-isomerase                                       | (AL011_04745)                   | Steroid biosynthesis                           |
| IPDPS     | 1-hydroxy-2-methyl-2-(E)-butenyl 4-<br>diphosphate reductase (ipdp)       | (AL011_04530)                   | Steroid biosynthesis                           |
| IPMD      | 3-isopropylmalate dehydrogenase                                           | (AL011_03900)                   | Valine, Leucine, and Isoleucine Metabolism     |
| IPPMIa    | 3-isopropylmalate dehydratase                                             | (AL011_01575) or (AL011_03455)  | Valine, Leucine, and Isoleucine Metabolism     |
| IPPMIb    | 2-isopropylmalate hydratase                                               | (AL011_01575) or (AL011_03455)  | Valine, Leucine, and Isoleucine Metabolism     |
| KARA1     | Ketol-acid reductoisomerase (2,3-<br>dihydroxy-3-methylbutanoate)         | (34021.12.peg.1195)             | Valine, Leucine, and Isoleucine Metabolism     |
| KARA2     | Ketol-acid reductoisomerase (2-<br>Acetolactate)                          | (34021.12.peg.1195)             | Valine, Leucine, and Isoleucine Metabolism     |
| KAS14     | Beta-ketoacyl-ACP synthase                                                | (AL011_01635)                   | Fatty Acid Biosynthesis                        |
| LEUTRS    | Leucyl-tRNA synthetase                                                    | (AL011_01965)                   | Valine, Leucine, and Isoleucine Metabolism     |
| LEUabcpp  | L-leucine transport via ABC system<br>(periplasm)                         | (AL011_04215) and (AL011_05135) | Transport                                      |
| LYSTRS    | Lysyl-tRNA synthetase                                                     | (AL011_04960)                   | Lysine Biosynthesis                            |
| LYSabcpp  | L-lysine transport via ABC system<br>(periplasm)                          | (AL011_05355)                   | Lysine Metabolism                              |
| MACPD     | Malonyl-ACP decarboxylase                                                 | (AL011_00190)                   | Fatty Acid Biosynthesis                        |
| MCOATA    | Malonyl-CoA-ACP transacylase                                              | (AL011_03285)                   | Fatty Acid Biosynthesis                        |
| MSO3abcpp | Methanesulfonate transport via ABC<br>system (periplasm)                  | (AL011_02995)                   | Transport                                      |
| MTHFC     | Methenyltetrahydrofolate cyclohydrolase                                   | (AL011_03430)                   | One Carbon pool by folate                      |
| MTHFD     | Methylenetetrahydrofolate dehydrogenase<br>(NADP)                         | (AL011_03430)                   | One Carbon pool by folate                      |
| MHPGLUT   | 5 methyltetrahydropteroyltriglutamate<br>homocysteine S methyltransferase | (AL011_04785)                   | Methionine Metabolism                          |

|          |                                                                         |                                                                                                                                                                                                                                                                           |                                            |
|----------|-------------------------------------------------------------------------|---------------------------------------------------------------------------------------------------------------------------------------------------------------------------------------------------------------------------------------------------------------------------|--------------------------------------------|
|          |                                                                         | (AL011_03635) and (AL011_03640) and<br>(AL011_03645) and (AL011_03650) and<br>(AL011_03655) and (AL011_03660) and<br>(AL011_03665) and (AL011_03670) and<br>(AL011_03675) and (AL011_03680) and<br>(AL011_03685) and (AL011_03690) and<br>(AL011_03695) and (AL011_03700) | Oxidative Phosphorylation                  |
| NADH16pp | NADH dehydrogenase (ubiquinone-8 & 3<br>protons) (periplasm)            |                                                                                                                                                                                                                                                                           | Nicotinate and Nicotinamide                |
| NADK     | NAD kinase                                                              | (AL011_02225)                                                                                                                                                                                                                                                             |                                            |
| NDPK1    | Nucleoside-diphosphate kinase<br>(ATP:GDP)                              | (AL011_01275)                                                                                                                                                                                                                                                             | Purine Metabolism                          |
| NDPK2    | Nucleoside-diphosphate kinase<br>(ATP:UDP)                              | (AL011_01275)                                                                                                                                                                                                                                                             | Pyrimidine Metabolism                      |
| NDPK3    | Nucleoside-diphosphate kinase<br>(ATP:CDP)                              | (AL011_01275)                                                                                                                                                                                                                                                             | Pyrimidine Metabolism                      |
| NDPK4    | Nucleoside-diphosphate kinase<br>(ATP:dTDP)                             | (AL011_01275)                                                                                                                                                                                                                                                             | Pyrimidine Metabolism                      |
| NDPK5    | Nucleoside-diphosphate kinase<br>(ATP:dGDP)                             | (AL011_01275)                                                                                                                                                                                                                                                             | Purine Metabolism                          |
| NDPK6    | Nucleoside-diphosphate kinase<br>(ATP:dUDP)                             | (AL011_01275)                                                                                                                                                                                                                                                             | Pyrimidine Metabolism                      |
| NDPK7    | Nucleoside-diphosphate kinase<br>(ATP:dCDP)                             | (AL011_01275)                                                                                                                                                                                                                                                             | Pyrimidine Metabolism                      |
| NDPK8    | Nucleoside-diphosphate kinase<br>(ATP:dADP)                             | (AL011_01275)                                                                                                                                                                                                                                                             | Purine Metabolism                          |
| NNATr    | Nicotinate-nucleotide adenylyltransferase                               | (AL011_02715)                                                                                                                                                                                                                                                             | Nicotinate and Nicotinamide                |
| NO2t2rpp | Nitrite transport in via proton symport,<br>reversible (periplasm)      | (AL011_04330)                                                                                                                                                                                                                                                             | Transport                                  |
| OIVD1r   | 2-oxoisovalerate dehydrogenase<br>(acylating; 4-methyl-2-oxopentanoate) | (AL011_04630)                                                                                                                                                                                                                                                             | Valine, leucine and isoleucine degradation |
| OIVD2    | 2-oxoisovalerate dehydrogenase<br>(acylating; 3-methyl-2-oxobutanoate)  | (AL011_04630)                                                                                                                                                                                                                                                             | Valine, leucine and isoleucine degradation |
| OIVD3    | 2-oxoisovalerate dehydrogenase<br>(acylating; 3-methyl-2-oxopentanoate) | (AL011_04630)                                                                                                                                                                                                                                                             | Valine, leucine and isoleucine degradation |
| ORNCD    | Ornithine cyclodeaminase                                                | (AL011_04580)                                                                                                                                                                                                                                                             | Arginine and Proline Metabolism            |
| ORNabcpp | Ornithine transport via ABC system<br>(periplasm)                       | (AL011_00190)                                                                                                                                                                                                                                                             | Lysine Metabolism                          |

|          |                                                     |                                                   |                                                |
|----------|-----------------------------------------------------|---------------------------------------------------|------------------------------------------------|
| ORPT     | Orotate phosphoribosyltransferase                   | (AL011_04445)                                     | Pyrimidine Metabolism                          |
| PANTS    | Pantothenate synthase                               | (AL011_02855)                                     | Pantothenate and CoA Biosynthesis              |
| PDH      | Pyruvate dehydrogenase                              | (AL011_02600)                                     | Glycolysis                                     |
| PDX5POi  | Pyridoxine 5-phosphate oxidase                      | (AL011_04220)                                     | Vitamin B6 Metabolism                          |
| PGAMT    | Phosphoglucosamine mutase                           | (AL011_03250)                                     | Aminosugar Metabolism                          |
| PGM      | Phosphoglycerate mutase                             | (AL011_00720)                                     | Gluconeogenesis                                |
| PGMT     | Phosphoglucomutase                                  | (AL011_04905)                                     | Glycolysis                                     |
| PMDPHT   | Pyrimidine phosphatase                              | (AL011_00160)                                     | Riboflavin Metabolism                          |
| PPA      | Inorganic diphosphatase                             | (AL011_00485)                                     | Oxidative Phosphorylation                      |
| PPBNGS   | Porphobilinogen synthase                            | (AL011_01095)                                     | Porphyrin and Chlorophyll Metabolism           |
| PPPGO    | Protoporphyrinogen oxidase (aerobic)                | (AL011_04735)                                     | Porphyrin and Chlorophyll Metabolism           |
| PRAGSr   | Phosphoribosylglycinamide synthase                  | (AL011_00375)                                     | Purine Metabolism                              |
| PRAIi    | Phosphoribosylanthranilate isomerase (irreversible) | (AL011_00030)                                     | Phenylalanine Tyrosine Tryptophan Biosynthesis |
| PRAIS    | Phosphoribosylaminoimidazole synthase               | (AL011_04245)                                     | Purine Metabolism                              |
| PRFGS    | Phosphoribosylformylglycinamide synthase            | (AL011_04230)                                     | Purine Metabolism                              |
| PSP_L    | Phosphoserine phosphatase (L-serine)                | ((AL011_01035) and (AL011_01040))                 | Glycine, Serine and threonine metabolism       |
| RIBabcpp | D-ribose transport via ABC system (periplasm)       | (AL011_03175) or (AL011_03000)                    | Transport                                      |
| RPE      | Ribulose 5-phosphate 3-epimerase                    | (AL011_04220)                                     | Pentose Phosphate Pathway                      |
| RPI      | Ribose-5-phosphate isomerase                        | (AL011_04645)                                     | Pentose Phosphate Pathway                      |
| SDPTA    | Succinyldiaminopimelate transaminase                | (AL011_01485)                                     | Lysine Biosynthesis                            |
| SERAT    | Serine O-acetyltransferase                          | (AL011_02565)                                     | Cysteine Metabolism                            |
| SERTRS   | Seryl-tRNA synthetase                               | (AL011_04220)                                     | Glycine, Serine and threonine metabolism       |
| SHCHF    | Sirohydrochlorin ferrochelatase                     | (AL011_02910)                                     | Porphyrin and Chlorophyll Metabolism           |
| SOTA     | Succinylornithine transaminase                      | (AL011_01485)                                     | Arginine and Proline Metabolism                |
| SUCD1    | Succinate dehydrogenase                             | (AL011_04595) and (AL011_04600) and (AL011_04590) | TCA Cycle                                      |
| SUCDi    | Succinate dehydrogenase (irreversible)              | (AL011_04595) and (AL011_04600) and (AL011_04590) | TCA Cycle                                      |
| SUCOAS   | Succinyl-CoA synthetase (ADP-forming)               | (AL011_04620)                                     | TCA Cycle                                      |
| SULabcpp | Sulfate transport via ABC system (periplasm)        | (AL011_03860)                                     | Sulfur Metabolism                              |

|               |                                                                                                       |                                                                                                           |                                             |
|---------------|-------------------------------------------------------------------------------------------------------|-----------------------------------------------------------------------------------------------------------|---------------------------------------------|
| TKT1          | Transketolase                                                                                         | (AL011_02685)                                                                                             | Pentose Phosphate Pathway                   |
| TRSARr        | Tartronate semialdehyde reductase                                                                     | (AL011_02400)                                                                                             | Glycolate metabolism                        |
| TSULabcpp     | Thiosulfate transport via ABC system (periplasm)                                                      | (AL011_03175) or (AL011_01035)                                                                            | Sulfur Metabolism                           |
| UDCPDP        | Undecaprenyl-diphosphatase                                                                            | (AL011_03015)                                                                                             | Peptidoglycan Biosynthesis                  |
| UMPK          | UMP kinase                                                                                            | (AL011_02090)                                                                                             | Pyrimidine Metabolism                       |
| UPPN          | B-ureidopropionase                                                                                    | (AL011_04855)                                                                                             | Pantothenate and CoA Biosynthesis           |
| UREA          | Urease                                                                                                | (AL011_03815)                                                                                             | Urea cycle/amino group metabolism           |
| VALTRS        | Valyl-tRNA synthetase                                                                                 | (AL011_04050)                                                                                             | Valine, Leucine, and Isoleucine Metabolism  |
| VANKpp        | VANKpp                                                                                                | (AL011_04215)                                                                                             | Transport                                   |
| VANLNtex      | VANLNtex                                                                                              | (AL011_04215)                                                                                             | Transport                                   |
| VANLTtex      | VANLTtex                                                                                              | (AL011_04215)                                                                                             | Transport                                   |
| VNLNpp        | VNLNpp                                                                                                | (AL011_04215)                                                                                             | Transport                                   |
| pentso3abcpp  | Pentso3abcpp                                                                                          | (AL011_03000)                                                                                             | Transport                                   |
| ACOLIPAabctex | Arabinose modified core oligosaccharide lipid A transport via ABC system (periplasm to extracellular) | ((AL011_01290) and (AL011_02275)) or (AL011_03275) or (AL011_03175) or (AL011_00025) or (AL011_02465)     | Lipopolysaccharide Biosynthesis / Recycling |
| ALATA_D2      | D-alanine transaminase                                                                                | (AL011_01080)                                                                                             | Cofactor and Prosthetic Group Biosynthesis  |
| ALATA_L2      | Alanine transaminase                                                                                  | ((AL011_04680) or (AL011_01080))                                                                          | Cofactor and Prosthetic Group Biosynthesis  |
| AMPTASECG     | Alanyl aminopeptidase (cys-gly)                                                                       | (AL011_01285)                                                                                             | Cysteine Metabolism                         |
| AMPTASEPG     | Aminopeptidase (pro-gly)                                                                              | (AL011_01285)                                                                                             | Arginine and Proline Metabolism             |
| ASCBptspp     | L-ascorbate transport via PEP:Pyr PTS (periplasm)                                                     | (AL011_05185)                                                                                             | Transport, Inner Membrane                   |
| BUTSO3abcpp   | Butanesulfonate transport via ABC system (periplasm)                                                  | ((AL011_03000) and (AL011_02995) and (AL011_01040))                                                       | Transport, Inner Membrane                   |
| CLIPAabctex   | Cold lipid A transport via ABC system (periplasm to extracellular)                                    | ((AL011_02350) and (AL011_01290) and (AL011_02275) and (AL011_02270) and (AL011_01300) and (AL011_01550)) | Lipopolysaccharide Biosynthesis / Recycling |
| COLIPAPabctex | Core oligosaccharide lipid A diphosphate transport via ABC system (periplasm to extracellular)        | ((AL011_01290) and (AL011_02270) and (AL011_02275))                                                       | Lipopolysaccharide Biosynthesis / Recycling |
| COLIPAabctex  | Core oligosaccharide lipid A transport via ABC system (periplasm to extracellular)                    | ((AL011_01290) and (AL011_02270) and (AL011_02275))                                                       | Lipopolysaccharide Biosynthesis / Recycling |
| CRNDabcpp     | D-carnitine transport via ABC system (periplasm)                                                      | ((AL011_01035) and (AL011_01040))                                                                         | Transport, Inner Membrane                   |

|                  |                                                                                                                        |                                                                                                                                                                                                                                                         |                                             |
|------------------|------------------------------------------------------------------------------------------------------------------------|---------------------------------------------------------------------------------------------------------------------------------------------------------------------------------------------------------------------------------------------------------|---------------------------------------------|
| CYSSADS          | L-cysteine sulfinic acid desulfurase                                                                                   | ((AL011_04825) or (AL011_04680))                                                                                                                                                                                                                        | Cysteine Metabolism                         |
| ECA4COLIPAabctex | Enterobacterial common antigen (x4) core oligosaccharide lipid A transport via ABC system (periplasm to extracellular) | ((AL011_02270) and (AL011_02350) and (AL011_02275) and (AL011_01290))                                                                                                                                                                                   | Lipopolysaccharide Biosynthesis / Recycling |
| ENLIPAabctex     | Phosphoethanolamine lipid A transport via ABC system (periplasm to extracellular)                                      | ((AL011_02275) and (AL011_01290) and (AL011_02270))                                                                                                                                                                                                     | Lipopolysaccharide Biosynthesis / Recycling |
| GRXR             | Glutaredoxin reductase                                                                                                 | (AL011_04220)                                                                                                                                                                                                                                           | Unassigned                                  |
| K2L4Aabctex      | KDO(2)-lipid IV A transport via ABC system (periplasm to extracellular)                                                | (AL011_03970)                                                                                                                                                                                                                                           | Lipopolysaccharide Biosynthesis / Recycling |
| KAS15            | Beta-ketoacyl-ACP synthase (2)                                                                                         | (AL011_03300)                                                                                                                                                                                                                                           | Membrane Lipid Metabolism                   |
| KDOPS            | 3-deoxy -D-manno-octulosonic -acid 8-phosphate synthase                                                                | (AL011_03470)                                                                                                                                                                                                                                           | Lipopolysaccharide Biosynthesis / Recycling |
| LIPAabctex       | Lipid A transport via ABC system (periplasm to extracellular)                                                          | (AL011_03970)                                                                                                                                                                                                                                           | Lipopolysaccharide Biosynthesis / Recycling |
| NADH17pp         | NADH dehydrogenase (menaquinone-8 & 3 protons) (periplasm)                                                             | (AL011_03635) and (AL011_03640) and (AL011_03645) and (AL011_03650) and (AL011_03655) and (AL011_03660) and (AL011_03665) and (AL011_03670) and (AL011_03675) and (AL011_03680) and (AL011_03685) and (AL011_03690) and (AL011_03695) and (AL011_03700) | Oxidative Phosphorylation                   |
| NADH18pp         | NADH dehydrogenase (demethylmenaquinone-8 & 3 protons) (periplasm)                                                     | (AL011_03635) and (AL011_03640) and (AL011_03645) and (AL011_03650) and (AL011_03655) and (AL011_03660) and (AL011_03665) and (AL011_03670) and (AL011_03675) and (AL011_03680) and (AL011_03685) and (AL011_03690) and (AL011_03695) and (AL011_03700) | Oxidative Phosphorylation                   |
| NADHHR           | NADH hydratase                                                                                                         | (AL011_02690)                                                                                                                                                                                                                                           | Metabolite Repair                           |
| NADHHS           | NADH hydratase                                                                                                         | (AL011_02690)                                                                                                                                                                                                                                           | Metabolite Repair                           |
| NADPHHR          | NADPH hydratase                                                                                                        | (AL011_02690)                                                                                                                                                                                                                                           | Metabolite Repair                           |
| NADPHHS          | NADPH hydratase                                                                                                        | (AL011_02690)                                                                                                                                                                                                                                           | Metabolite Repair                           |

|               |                                                              |                                                                                 |                                             |
|---------------|--------------------------------------------------------------|---------------------------------------------------------------------------------|---------------------------------------------|
|               | O16 antigen (x4) core oligosaccharide                        |                                                                                 |                                             |
| O16A4COLIPAab | lipid A transport via ABC system                             | (AL011_02265) and (AL011_02270) and                                             |                                             |
| ctex          | (periplasm to extracellular)                                 | (AL011_02275)                                                                   | Lipopolysaccharide Biosynthesis / Recycling |
| OCTDPS        | Octaprenyl pyrophosphate synthase                            | (AL011_01275))                                                                  | Cofactor and Prosthetic Group Biosynthesis  |
| OMBZLM        | 2-Octaprenyl-6-methoxy-benzoquinol<br>methylase              | (AL011_01275))                                                                  | Cofactor and Prosthetic Group Biosynthesis  |
| RNDR3b        | Ribonucleoside-diphosphate reductase<br>(CDP) (glutaredoxin) | ((AL011_03450) and (AL011_03600)) or<br>(AL011_04205)                           | Nucleotide Salvage Pathway                  |
| RNDR4b        | Ribonucleoside-diphosphate reductase<br>(UDP) (glutaredoxin) | (AL011_02155)                                                                   | Nucleotide Salvage Pathway                  |
| S2FE2SR       | SUF [2Fe-2S] regeneration                                    | (AL011_04375) and (AL011_04680) and<br>(AL011_04675) and (AL011_04670)          | Cofactor and Prosthetic Group Biosynthesis  |
| S2FE2SS       | SUF [2Fe-2S] Synthesis                                       | (AL011_04375) and (AL011_04680) and<br>(AL011_04675) and (AL011_04670)          | Cofactor and Prosthetic Group Biosynthesis  |
| S2FE2SS2      | SUF [2Fe-2S] Synthesis II                                    | (AL011_04375) and (AL011_04680) and<br>(AL011_04675) and (AL011_04670)          | Cofactor and Prosthetic Group Biosynthesis  |
| S2FE2ST       | SUF [2Fe-2S] Transfer                                        | (AL011_04375) and (AL011_04680) and<br>(AL011_04675) and (AL011_04670)          | Cofactor and Prosthetic Group Biosynthesis  |
| S4FE4SR       | SUF [4Fe-4S] Reduction                                       | (AL011_04375) and (AL011_04680) and<br>(AL011_04675) and (AL011_04670)          | Cofactor and Prosthetic Group Biosynthesis  |
| S4FE4ST       | SUF [4Fe-4S] Transfer                                        | (AL011_04375) and (AL011_04680) and<br>(AL011_04675) and (AL011_04670)          | Cofactor and Prosthetic Group Biosynthesis  |
| SCYSDS        | SUF Cysteine desulfuration                                   | (AL011_04680)                                                                   | Cofactor and Prosthetic Group Biosynthesis  |
| FEex          | Iron transporter                                             | ((AL011_03280) and (AL011_03275) and<br>(AL011_03265)) or (AL011_03970)         | iron metabolism                             |
| FEpp          | Iron transporter                                             | ((AL011_03280) and (AL011_03275) and<br>(AL011_03265)) or (AL011_03970)         | iron metabolism                             |
| Kt3pp         | Potassium transport out via proton<br>antiport (periplasm)   | (AL011_04005)                                                                   | Inorganic Ion Transport and Metabolism      |
| 2DHGLCNkt_tpp | 2DHGLCNkt tpp                                                | (B488_10160) or (B488_02930) or (B488_00560) or<br>(B488_08370) or (B488_11610) | Transport                                   |
| 4HBZtex       | 4-Hydroxybenzoate transport<br>(extracellular)               | (B488_01170) or (B488_06670)                                                    | Transport                                   |
| 4HTHRS        | 4-Hydroxy-L-threonine synthase                               | (B488_05900) or (B488_00990)                                                    | Vitamin B6 Metabolism                       |
| ACCOAC        | Acetyl-CoA carboxylase                                       | ((B488_13670) and (B488_09100) and<br>(B488_11350) and (B488_09110))            | Fatty Acid Biosynthesis                     |

|          |                                                                       |                                                                                                                                                                           |                                                |
|----------|-----------------------------------------------------------------------|---------------------------------------------------------------------------------------------------------------------------------------------------------------------------|------------------------------------------------|
| ACGS     | N-acetylglutamate synthase                                            | (B488_13230) or (B488_03310)                                                                                                                                              | Urea cycle/amino group metabolism              |
| ACHBS    | 2-aceto-2-hydroxybutanoate synthase                                   | (B488_06340)                                                                                                                                                              | Valine, Leucine, and Isoleucine Metabolism     |
| ACOATA   | Acetyl-CoA ACP transacylase                                           | ((B488_10110) and (B488_03640))                                                                                                                                           | Fatty Acid Biosynthesis                        |
| ACONT    | Aconitate hydratase                                                   | (B488_01200)                                                                                                                                                              | TCA Cycle                                      |
| ACONTa   | Aconitase (half-reaction A, Citrate hydro-lyase)                      | (B488_01200)                                                                                                                                                              | TCA Cycle                                      |
| ACONTb   | Aconitase (half-reaction B, Isocitrate hydro-lyase)                   | (B488_01200)                                                                                                                                                              | TCA Cycle                                      |
| ADSL1r   | Adenylosuccinate lyase                                                | (B488_05360) or (B488_04530)                                                                                                                                              | Purine Metabolism                              |
| ADSL2r   | Adenylosuccinate lyase                                                | (B488_05360) or (B488_02110) or (B488_04530) or (B488_04420)                                                                                                              | Purine Metabolism                              |
| AGPAT120 | 1-tetradecanoyl-sn-glycerol 3-phosphate O-acyltransferase (n-C12:0)   | (B488_01290)                                                                                                                                                              | Glycerophospholipid Metabolism                 |
| AGPAT160 | 1-hexadecanoyl-sn-glycerol 3-phosphate O-acyltransferase (n-C16:0)    | (B488_01290)                                                                                                                                                              | Glycerophospholipid Metabolism                 |
| AGPAT161 | 1-hexadec-7-enoyl-sn-glycerol 3-phosphate O-acyltransferase (n-C16:1) | (B488_01290)                                                                                                                                                              | Glycerophospholipid Metabolism                 |
| AGPAT180 | 1-octadecanoyl-sn-glycerol 3-phosphate O-acyltransferase (n-C18:0)    | (B488_01290)                                                                                                                                                              | Glycerophospholipid Metabolism                 |
| AGPAT181 | 1-octadec-7-enoyl-sn-glycerol 3-phosphate O-acyltransferase (n-C18:1) | (B488_01290)                                                                                                                                                              | Glycerophospholipid Metabolism                 |
| AKGDH    | 2-Oxoglutarate dehydrogenase                                          | ((B488_07400) and (B488_07420) and (B488_07410))                                                                                                                          | TCA Cycle                                      |
| AKGt2rpp | 2-oxoglutarate reversible transport via symport (periplasm)           | (B488_01170) or (B488_02930)                                                                                                                                              | Transport                                      |
| ALAALAr  | D-alanine-D-alanine ligase (reversible)                               | ((B488_05940) or (B488_05940))                                                                                                                                            | Peptidoglycan Biosynthesis                     |
| ANPRT    | Anthranilate phosphoribosyltransferase                                | (B488_13100) or (B488_13110) or (B488_10810)                                                                                                                              | Phenylalanine Tyrosine Tryptophan Biosynthesis |
| ANS      | Anthranilate synthase                                                 | ((B488_13100) and (B488_13120))                                                                                                                                           | Phenylalanine Tyrosine Tryptophan Biosynthesis |
| ARGSS    | Argininosuccinate synthase                                            | (B488_10220)                                                                                                                                                              | Arginine and Proline Metabolism                |
| ARGabcpp | L-arginine transport via ABC system (periplasm)                       | ((B488_06120) and (B488_06080)) or (B488_08860) or ((B488_10540) and (B488_06120)) or ((B488_06130) and (B488_06120) and (B488_06080)) or ((B488_08860) and (B488_08850)) | Transport                                      |
| ASNS1    | Asparagine synthase (glutamine-hydrolysing)                           | (B488_03130)                                                                                                                                                              | Alanine and Aspartate Metabolism               |



|             |                                                                    |                                                                                                                                                      |                                          |
|-------------|--------------------------------------------------------------------|------------------------------------------------------------------------------------------------------------------------------------------------------|------------------------------------------|
| ASPabcpp    | L-aspartate transport via ABC system (periplasm)                   | ((B488_08850) and (B488_08840) and (B488_08830) and (B488_08830)) or ((B488_06120) and (B488_06060) or (B488_05640)) or (B488_06080) or (B488_08860) | Transport                                |
| ATPPRT      | ATP phosphoribosyltransferase                                      | (B488_09910) or (B488_00990) or (B488_05900)                                                                                                         | Histidine Metabolism                     |
| ATPS4rpp    | ATP synthase (four protons for one ATP) (periplasm)                | ((B488_11790) and (B488_11760) and (B488_07350) and (B488_11780) and (B488_11800) and (B488_11770))                                                  | Oxidative Phosphorylation                |
| BZt1pp      | Benzoate transport in via proton symport (periplasm)               | (B488_03690) or (B488_08370)                                                                                                                         | B-Ketoadipate pathway                    |
| CATECHOLtex | CATECHOLtex                                                        | (B488_06090)                                                                                                                                         | Transport                                |
| CATECHOLtpp | CATECHOLtpp                                                        | (B488_06090)                                                                                                                                         | Transport                                |
| CHLabcpp    | Choline transport via ABC system (periplasm)                       | ((B488_10780) and (B488_03240)) or (B488_10540) or (B488_10770) or (B488_11480) or (B488_12610) or (B488_13000)                                      | Transport                                |
| CHOLS_ex    | CHOLS LPAREN ex RPAREN                                             | (B488_05900)                                                                                                                                         | Transport                                |
| DAPE        | Diaminopimelate epimerase                                          | (B488_12670)                                                                                                                                         | Lysine Biosynthesis                      |
| CHOLSabc    | CHOLSabc                                                           | (B488_10780) or (B488_03240)) or (B488_10540) or (B488_10770) or (B488_11480) or (B488_12610) or (B488_13000)                                        | Glycine, Serine and threonine metabolism |
| CITt_kt     | Citrate proton symport periplasm                                   | (B488_01170) or (B488_02930)                                                                                                                         | Transport                                |
| COBALT2tex  | Cobalt (Co+2) transport via diffusion (extracellular to periplasm) | (B488_11490)                                                                                                                                         | Transport                                |
| CRNabcpp    | L-carnitine transport via ABC system (periplasm)                   | ((B488_10770) and (B488_10540) and (B488_10780)) or (B488_11480) or (B488_08860)                                                                     | Transport                                |
| CS          | Citrate synthase                                                   | (B488_10770) or ((B488_11480) and (B488_10780))                                                                                                      | TCA Cycle                                |
| CTPS2       | CTP synthase (glutamine)                                           | (B488_02930)                                                                                                                                         | Pyrimidine Metabolism                    |
| CYO1b       | CYO1b                                                              | ((B488_00820) and (B488_00810))                                                                                                                      | Oxidative Phosphorylation                |
| CYSS        | Cysteine synthase                                                  | ((B488_05900) and (B488_02930))                                                                                                                      | Cysteine Metabolism                      |
| CYSTL       | Cystathionine b-lyase                                              | ((B488_11550) and (B488_00630))                                                                                                                      | Methionine Metabolism                    |
| CYSabcpp    | L-cysteine uptake via ABC system (periplasm)                       | (B488_01620)                                                                                                                                         | Transport                                |
| DADK        | Deoxyadenylate kinase                                              | (B488_03690)                                                                                                                                         | Purine Metabolism                        |

|          |                                                          |                                                                                    |                                                |
|----------|----------------------------------------------------------|------------------------------------------------------------------------------------|------------------------------------------------|
| DAPDC    | Diaminopimelate decarboxylase                            | (B488_02090)) or ((B488_09190)                                                     | Lysine Biosynthesis                            |
| DASYN120 | CDP-diacylglycerol synthetase (n-C12:0)                  | (B488_00450)                                                                       | Glycerophospholipid Metabolism                 |
| DASYN160 | CDP-diacylglycerol synthetase (n-C16:0)                  | (B488_00450)                                                                       | Glycerophospholipid Metabolism                 |
| DASYN161 | CDP-diacylglycerol synthetase (n-C16:1)                  | (B488_00450)                                                                       | Glycerophospholipid Metabolism                 |
| DASYN180 | CDP-diacylglycerol synthetase (n-C18:0)                  | (B488_00450)                                                                       | Glycerophospholipid Metabolism                 |
| DASYN181 | CDP-diacylglycerol synthetase (n-C18:1)                  | (B488_00450)                                                                       | Glycerophospholipid Metabolism                 |
| DB4PS    | 3,4-Dihydroxy-2-butanone-4-phosphate synthase            | (B488_05900)                                                                       | Riboflavin Metabolism                          |
| DDPA     | 3-deoxy-D-arabino-heptulosonate 7-phosphate synthetase   | (B488_07360)                                                                       | Phenylalanine Tyrosine Tryptophan Biosynthesis |
| DHPM1    | Dihydropyrimidinase (5,6-dihydrouracil)                  | (B488_09560)                                                                       | Pantothenate and CoA Biosynthesis              |
| DMATT    | Dimethylallyltranstransferase                            | (B488_00690)                                                                       | Steroid biosynthesis                           |
| DNAMTn2r | DNA (cytosine-5-)-methyltransferase                      | (B488_06600)                                                                       | Methionine Metabolism                          |
| DNTPPA   | Dihydroneopterin triphosphate pyrophosphatase            | (B488_03320)                                                                       | Folate Biosynthesis                            |
| DPCOAK   | Dephospho-CoA kinase                                     | (B488_13730)                                                                       | Pantothenate and CoA Biosynthesis              |
| DPR      | 2-dehydropantoate 2-reductase                            | (B488_01360) or (B488_11240)                                                       | Pantothenate and CoA Biosynthesis              |
| DTMPK    | DTMP kinase                                              | (B488_08030)                                                                       | Pyrimidine Metabolism                          |
| DURAD    | Dihydrouracil dehydrogenase (NADP)                       | (B488_01480)                                                                       | Pantothenate and CoA Biosynthesis              |
| DUTPDP   | DUTP diphosphatase                                       | (B488_05450) or (B488_09830)                                                       | Pyrimidine Metabolism                          |
| DXPS     | 1-deoxy-D-xylulose 5-phosphate synthase                  | (B488_11020)                                                                       | Steroid biosynthesis                           |
| EAR100y  | Enoyl-[acyl-carrier-protein] reductase (NADPH) (n-C10:0) | ((B488_02950) and (B488_01060))                                                    | Fatty Acid Biosynthesis                        |
| EAR120y  | Enoyl-[acyl-carrier-protein] reductase (NADPH) (n-C12:0) | ((B488_10280) and (B488_10270) and (B488_00950) and (B488_10290) and (B488_10260)) | Fatty Acid Biosynthesis                        |
| EAR121y  | Enoyl-[acyl-carrier-protein] reductase (NADPH) (n-C12:1) | ((B488_10270) and (B488_10290) and (B488_10260))                                   | Fatty Acid Biosynthesis                        |
| EAR160y  | Enoyl-[acyl-carrier-protein] reductase (NADPH) (n-C16:0) | (B488_11480)                                                                       | Fatty Acid Biosynthesis                        |

|             |                                                               |                                                               |                                      |
|-------------|---------------------------------------------------------------|---------------------------------------------------------------|--------------------------------------|
| EAR161y     | Enoyl-[acyl-carrier-protein] reductase (NADPH) (n-C16:1)      | ((B488_11480) and (B488_10780))                               | Fatty Acid Biosynthesis              |
| EAR180y     | Enoyl-[acyl-carrier-protein] reductase (NADPH) (n-C18:0)      | (B488_02950) or (B488_01060)                                  | Fatty Acid Biosynthesis              |
| EAR181y     | Enoyl-[acyl-carrier-protein] reductase (NADPH) (n-C18:1)      | (B488_02950) or (B488_01060)                                  | Fatty Acid Biosynthesis              |
| EAR40y      | Enoyl-[acyl-carrier-protein] reductase (NADPH) (n-C4:0)       | (B488_02950) or (B488_01060)                                  | Fatty Acid Biosynthesis              |
| EAR60y      | Enoyl-[acyl-carrier-protein] reductase (NADPH) (n-C6:0)       | ((B488_10890)                                                 | Fatty Acid Biosynthesis              |
| EAR80y      | Enoyl-[acyl-carrier-protein] reductase (NADPH) (n-C8:0)       | (B488_05290))                                                 | Fatty Acid Biosynthesis              |
| ETHSO3abcpp | Ethanesulfonate transport via ABC system (periplasm)          | ((B488_11480) and (B488_10550) and (B488_05980))              | Transport                            |
| FBA         | Fructose-bisphosphate aldolase                                | (B488_12160)                                                  | Glycolysis                           |
| FBP         | Fructose-bisphosphatase                                       | (B488_05190)                                                  | Glycolysis                           |
| FDH         | Formate dehydrogenase                                         | ((B488_02630) and (B488_02620) and (B488_02610))              | Methane Metabolism                   |
| FE2abc      | Iron (II) transport via ABC system                            | (B488_08860)) or (B488_10770) or (B488_11190) or (B488_11480) | Transport                            |
| FERtex      | FERtex                                                        | (B488_10270) or (B488_13000)                                  | Transport                            |
| FERtpp      | FERtpp                                                        | (B488_10270) or (B488_13000)                                  | Transport                            |
| FRUpts      | D-fructose transport via PEP:Pyr PTS                          | (B488_02780)                                                  | Fructose Metabolism                  |
| FTHFD       | Formyltetrahydrofolate deformylase                            | ((B488_09590) or (B488_09590))                                | One Carbon pool by folate            |
| FUM         | Fumarase                                                      | (B488_06010)                                                  | TCA Cycle                            |
| FUMtex      | Fumarate transport via diffusion (extracellular to periplasm) | (B488_04530)                                                  | Transport                            |
| G1SAT       | Glutamate-1-semialdehyde aminotransferase                     | (B488_01500)                                                  | Porphyrin and Chlorophyll Metabolism |
| G3PAT120    | Glycerol-3-phosphate acyltransferase (C12:0)                  | (B488_10110) or (B488_09760)                                  | Glycerophospholipid Metabolism       |
| G3PAT160    | Glycerol-3-phosphate acyltransferase (C16:0)                  | (B488_10110) or (B488_09760)                                  | Glycerophospholipid Metabolism       |
| G3PAT161    | Glycerol-3-phosphate acyltransferase (C16:1)                  | (B488_10110) or (B488_09760)                                  | Glycerophospholipid Metabolism       |

|             |                                                                     |                                                                                              |                                          |
|-------------|---------------------------------------------------------------------|----------------------------------------------------------------------------------------------|------------------------------------------|
| G3PAT180    | Glycerol-3-phosphate acyltransferase (C18:0)                        | (B488_10110) or (B488_09760)                                                                 | Glycerophospholipid Metabolism           |
| G3PAT181    | Glycerol-3-phosphate acyltransferase (C18:1)                        | (B488_10110) or (B488_09760)                                                                 | Glycerophospholipid Metabolism           |
| G6PDH2r     | Glucose 6-phosphate dehydrogenase                                   | (B488_03930) or (B488_11480)                                                                 | Glycolysis                               |
| GARFT       | Phosphoribosylglycinamide formyltransferase                         | (B488_10740) or (B488_10070) or (B488_13310)                                                 | One Carbon pool by folate                |
| GF6PTA      | Glutamine-fructose-6-phosphate transaminase                         | (B488_03130) or (B488_06870)                                                                 | Glutamate Metabolism                     |
| GLCNt2rpp   | D-gluconate transport via proton symport, reversible (periplasm)    | (B488_10790)                                                                                 | Transport                                |
| GLCabcpp    | D-glucose transport via ABC system (periplasm)                      | (B488_08860) or (B488_10770)                                                                 | Transport                                |
| GLNS        | Glutamine synthetase                                                | (B488_12180)                                                                                 | Glutamate Metabolism                     |
| GLNTRAT     | Glutamyl-tRNA(Gln) amidotransferase                                 | (B488_09770) and (B488_09780)                                                                | Glutamate Metabolism                     |
| GLUSy       | Glutamate synthase (NADPH)                                          | (B488_07400)                                                                                 | Glutamate Metabolism                     |
| GLUt4pp     | Na <sup>+</sup> /glutamate symport (periplasm)                      | (B488_05430)                                                                                 | Transport                                |
| GLXCL       | Glyoxalate carboligase                                              | (B488_06150) or (B488_02470) or (B488_11010)                                                 | Glycolate metabolism                     |
| GLYALDDr    | D-Glyceraldehyde dehydrogenase                                      | (B488_08390)                                                                                 | Glycerophospholipid Metabolism           |
| GLYALDtex   | Glyceraldehyde transport via diffusion (extracellular to periplasm) | (B488_11250) or (B488_12030)                                                                 | Transport                                |
| GLYBabcpp   | Glycine betaine transport via ABC system (periplasm)                | (B488_08590)                                                                                 | Arginine and Proline Metabolism          |
| GLYCK       | Glycerate kinase                                                    | (B488_11520)                                                                                 | Glycine, Serine and threonine metabolism |
| GLYCL       | Glycine Cleavage System                                             | (B488_07370) or (B488_07400) or (B488_11040) or (B488_07370) or (B488_07400) or (B488_11040) | Glycine, Serine and threonine metabolism |
| GLYCLTt2rpp | Glycolate transport via proton symport, reversible (periplasm)      | (B488_07370) or (B488_07400) or (B488_11040) or (B488_07370) or (B488_07400) or (B488_11040) | Transport                                |
| GLYCLTtex   | Glycolate transport via diffusion (extracellular to periplasm)      | (B488_07370) or (B488_07400) or (B488_11040) or (B488_07370) or (B488_07400) or (B488_11040) | Transport                                |
| GLYCL_2     | Glycine cleavage system, cytosol                                    | (B488_07370) or (B488_07400) or (B488_11040) or (B488_07370) or (B488_07400) or (B488_11040) | Nitrogen Metabolism                      |

|          |                                                                  |                                                                                                                                                                                                     |                                                |
|----------|------------------------------------------------------------------|-----------------------------------------------------------------------------------------------------------------------------------------------------------------------------------------------------|------------------------------------------------|
| GLYCTO1  | Glycolate oxidase                                                | ((B488_00600) and (B488_07480))                                                                                                                                                                     | Glycolate metabolism                           |
| GLYTRS   | Glycyl-tRNA synthetase                                           | (B488_08160)                                                                                                                                                                                        | Glycine, Serine and threonine metabolism       |
|          |                                                                  | (B488_08850) and (B488_06060)) or ((B488_08830) and (B488_08840) and (B488_02750)) or (B488_03240) or (B488_05640) or (B488_06080) or (B488_08860) or (B488_10540) or (B488_11190) or ((B488_12610) |                                                |
| GLYabcpp | Glycine transport via ABC system                                 |                                                                                                                                                                                                     | Transport                                      |
| GMPS2    | GMP synthase                                                     | (B488_06870)                                                                                                                                                                                        | Purine Metabolism                              |
| GRTT     | Geranyltranstransferase                                          | (B488_00690)                                                                                                                                                                                        | Steroid biosynthesis                           |
| GTHPi    | Glutathione peridoxase                                           | (B488_04630)                                                                                                                                                                                        | Glutathione Metabolism                         |
| GTHS     | Glutathione synthetase                                           | (B488_10080)                                                                                                                                                                                        | Glutamate Metabolism                           |
| GTPCII   | GTP cyclohydrolase II                                            | (B488_02240) or (B488_02240)                                                                                                                                                                        | Riboflavin Metabolism                          |
| GTPDPDP  | Guanosine-5-triphosphate,3-diphosphate diphosphatase             | (B488_10590)                                                                                                                                                                                        | Purine Metabolism                              |
| GUAPRT   | Guanine phosphoribosyltransferase                                | (B488_06500)                                                                                                                                                                                        | Purine Metabolism                              |
| HCO3_NAt | Bicarbonate transport (Na/HCO3 cotransport)                      | (B488_12660)                                                                                                                                                                                        | Transport                                      |
| HEMEOS   | Heme O synthase                                                  | (B488_02230)                                                                                                                                                                                        | Porphyrin and Chlorophyll Metabolism           |
| HISabcpp | L-histidine transport via ABC system (periplasm)                 | (B488_08850) and (B488_10550) and (B488_08840)                                                                                                                                                      | Transport                                      |
| HISStex  | L-histidine transport via diffusion (extracellular to periplasm) | (B488_07290)                                                                                                                                                                                        | Transport                                      |
| HMBS     | Hydroxymethylbilane synthase                                     | (B488_07550)                                                                                                                                                                                        | Porphyrin and Chlorophyll Metabolism           |
| HMGL     | Hydroxymethylglutaryl-CoA lyase                                  | (B488_01190)                                                                                                                                                                                        | Synthesis and degradation of Ketones Bodies    |
| HXAteX   | Hexanoate transport via diffusion (extracellular to periplasm)   | (B488_09870) and (B488_13370) and (B488_09950) and (B488_12880)                                                                                                                                     | Transport                                      |
| ICDHyr   | Isocitrate dehydrogenase (NADP)                                  | (B488_04640)                                                                                                                                                                                        | TCA Cycle                                      |
| ICITteX  | Citrate transport via diffusion extracellular to periplasm       | (B488_01170) and (B488_0528)                                                                                                                                                                        | Transport                                      |
| ICL      | Isocitrate lyase                                                 | (B488_01740)                                                                                                                                                                                        | TCA Cycle                                      |
| IGPS     | Indole-3-glycerol-phosphate synthase                             | (B488_03020) or (B488_13490) or (B488_03030) or (B488_05410)                                                                                                                                        | Phenylalanine Tyrosine Tryptophan Biosynthesis |
| ILEabcpp | L-isoleucine transport via ABC system (periplasm)                | (B488_07550)                                                                                                                                                                                        | Transport                                      |
| IMPC     | IMP cyclohydrolase                                               | (B488_12320)                                                                                                                                                                                        | Purine Metabolism                              |

|             |                                                                        |                                                                  |                                            |
|-------------|------------------------------------------------------------------------|------------------------------------------------------------------|--------------------------------------------|
| IPDDI       | Isopentenyl-diphosphate D-isomerase                                    | (B488_07730)                                                     | Steroid biosynthesis                       |
| IPMD        | 3-isopropylmalate dehydrogenase                                        | (B488_04640) or (B488_06680)                                     | Valine, Leucine, and Isoleucine Metabolism |
| IPPMIa      | 3-isopropylmalate dehydratase                                          | (B488_01200)                                                     | Valine, Leucine, and Isoleucine Metabolism |
| IPPMIb      | 2-isopropylmalate hydratase                                            | (B488_01200)                                                     | Valine, Leucine, and Isoleucine Metabolism |
| ISETACabcpp | Isethionate transport via ABC system (periplasm)                       | (B488_11480)                                                     | Transport                                  |
| KARA1       | Ketol-acid reductoisomerase (2,3-dihydroxy-3-methylbutanoate)          | (B488_01360)                                                     | Valine, Leucine, and Isoleucine Metabolism |
| KARA2       | Ketol-acid reductoisomerase (2-Acetolactate)                           | (B488_01360)                                                     | Valine, Leucine, and Isoleucine Metabolism |
| KAS14       | Beta-ketoacyl-ACP synthase                                             | (B488_01070)                                                     | Fatty Acid Biosynthesis                    |
| LEUTRS      | Leucyl-tRNA synthetase                                                 | (B488_00070)                                                     | Valine, Leucine, and Isoleucine Metabolism |
| LEUabcpp    | L-leucine transport via ABC system (periplasm)                         | (B488_10380)                                                     | Transport                                  |
| LYSTRS      | Lysyl-tRNA synthetase                                                  | (B488_06400)                                                     | Lysine Biosynthesis                        |
| LYSabcpp    | L-lysine transport via ABC system (periplasm)                          | (B488_07380) and (B488_06670)                                    | Lysine Metabolism                          |
| MACPD       | Malonyl-ACP decarboxylase                                              | ((B488_01070) or (B488_10100))                                   | Fatty Acid Biosynthesis                    |
| MCOATA      | Malonyl-CoA-ACP transacylase                                           | (B488_10130)                                                     | Fatty Acid Biosynthesis                    |
| METAT       | Methionine adenosyltransferase                                         | (B488_01620)                                                     | Methionine Metabolism                      |
| METS        | Methionine synthase                                                    | (B488_04950)                                                     | Methionine Metabolism                      |
| METabcpp    | L-methionine transport via ABC system (periplasm)                      | ((B488_10540) and (B488_10550) and (B488_10560)) or (B488_08860) | Transport                                  |
| MSO3abcpp   | Methanesulfonate transport via ABC system (periplasm)                  | (B488_10130))                                                    | Transport                                  |
| MTHFC       | Methenyltetrahydrofolate cyclohydrolase                                | (B488_03910)                                                     | One Carbon pool by folate                  |
| MTHFD       | Methylenetetrahydrofolate dehydrogenase (NADP)                         | (B488_03910)                                                     | One Carbon pool by folate                  |
| MHPGLUT     | 5 methyltetrahydropteroyltriglutamate homocysteine S methyltransferase | (B488_03820) or (B488_08800)                                     | Methionine Metabolism                      |

|            |                                                                      |                                                                                                                                                                                                                                                          |                                            |
|------------|----------------------------------------------------------------------|----------------------------------------------------------------------------------------------------------------------------------------------------------------------------------------------------------------------------------------------------------|--------------------------------------------|
|            |                                                                      | (B488_02570) and (B488_02580) and (B488_02590)<br>and (B488_02600) and (B488_02610) and<br>(B488_02620) and (B488_02630) and (B488_02640)<br>and (B488_02650) and (B488_02660) and<br>(B488_02670) and (B488_02680) and (B488_02690)<br>and (B488_02700) | Oxidative Phosphorylation                  |
| NADH16pp   | NADH dehydrogenase (ubiquinone-8 & 3 protons) (periplasm)            |                                                                                                                                                                                                                                                          |                                            |
| NADK       | NAD kinase                                                           | (B488_00710)                                                                                                                                                                                                                                             | Nicotinate and Nicotinamide                |
| NAt3_1p5pp | Sodium proton antiporter (H:NA is 1.5) (periplasm)                   | (B488_06670) or (B488_09960)                                                                                                                                                                                                                             | Transport                                  |
| NDPK1      | Nucleoside-diphosphate kinase (ATP:GDP)                              | (B488_02460)                                                                                                                                                                                                                                             | Purine Metabolism                          |
| NDPK2      | Nucleoside-diphosphate kinase (ATP:UDP)                              | (B488_02460)                                                                                                                                                                                                                                             | Pyrimidine Metabolism                      |
| NDPK3      | Nucleoside-diphosphate kinase (ATP:CDP)                              | (B488_02460)                                                                                                                                                                                                                                             | Pyrimidine Metabolism                      |
| NDPK4      | Nucleoside-diphosphate kinase (ATP:dTDP)                             | (B488_02460)                                                                                                                                                                                                                                             | Pyrimidine Metabolism                      |
| NDPK5      | Nucleoside-diphosphate kinase (ATP:dGDP)                             | (B488_02460)                                                                                                                                                                                                                                             | Purine Metabolism                          |
| NDPK6      | Nucleoside-diphosphate kinase (ATP:dUDP)                             | (B488_02460)                                                                                                                                                                                                                                             | Pyrimidine Metabolism                      |
| NDPK7      | Nucleoside-diphosphate kinase (ATP:dCDP)                             | (B488_02460)                                                                                                                                                                                                                                             | Pyrimidine Metabolism                      |
| NDPK8      | Nucleoside-diphosphate kinase (ATP:dADP)                             | (B488_02460)                                                                                                                                                                                                                                             | Purine Metabolism                          |
| NI2uabcpp  | Nickel transport via ABC system (uptake, periplasm)                  | (B488_03250)                                                                                                                                                                                                                                             | Transport                                  |
| NNATr      | Nicotinate-nucleotide adenylyltransferase                            | (B488_12100)                                                                                                                                                                                                                                             | Nicotinate and Nicotinamide                |
| NO2t2rpp   | Nitrite transport in via proton symport, reversible (periplasm)      | (B488_06750)                                                                                                                                                                                                                                             | Transport                                  |
| OIVD1r     | 2-oxoisovalerate dehydrogenase (acylating; 4-methyl-2-oxopentanoate) | (B488_07420)                                                                                                                                                                                                                                             | Valine, leucine and isoleucine degradation |
| OIVD2      | 2-oxoisovalerate dehydrogenase (acylating; 3-methyl-2-oxobutanoate)  | (B488_07420)                                                                                                                                                                                                                                             | Valine, leucine and isoleucine degradation |

|           |                                                                                  |                                                                 |                                                |
|-----------|----------------------------------------------------------------------------------|-----------------------------------------------------------------|------------------------------------------------|
| OIVD3     | 2-oxoisovalerate dehydrogenase<br>(acylating; 3-methyl-2-oxopentanoate)          | (B488_07420)                                                    | Valine, leucine and isoleucine degradation     |
| OMPDC     | Orotidine-5-phosphate decarboxylase                                              | (B488_01160)                                                    | Pyrimidine Metabolism                          |
| ORNabcpp  | Ornithine transport via ABC system<br>(periplasm)                                | (B488_08860)                                                    | Lysine Metabolism                              |
| ORPT      | Orotate phosphoribosyltransferase                                                | (B488_06500)                                                    | Pyrimidine Metabolism                          |
| PANTS     | Pantothenate synthase                                                            | (B488_11870)                                                    | Pantothenate and CoA Biosynthesis              |
| PAPPT3    | Phospho-N-acetylmuramoyl-pentapeptide-<br>transferase (meso-2,6-diaminopimelate) | (B488_07140)                                                    | Peptidoglycan Biosynthesis                     |
| PDH       | Pyruvate dehydrogenase                                                           | (B488_07400) or (B488_11040)                                    | Glycolysis                                     |
| PDX5POi   | Pyridoxine 5-phosphate oxidase                                                   | (B488_02960)                                                    | Vitamin B6 Metabolism                          |
| PENTSOtex | PENTSOtex                                                                        | (B488_11480)                                                    | Transport                                      |
| PHETRS    | Phenylalanyl-tRNA synthetase                                                     | (B488_10630) and (B488_10640)                                   | Phenylalanine Tyrosine Tryptophan Biosynthesis |
| PMDPHT    | Pyrimidine phosphatase                                                           | (B488_08800)                                                    | Riboflavin Metabolism                          |
| PPA       | Inorganic diphosphatase                                                          | (B488_10200)                                                    | Oxidative Phosphorylation                      |
| PPBNGS    | Porphobilinogen synthase                                                         | (B488_03540)                                                    | Porphyrin and Chlorophyll Metabolism           |
| PPPGO     | Protoporphyrinogen oxidase (aerobic)                                             | (B488_08410)                                                    | Porphyrin and Chlorophyll Metabolism           |
| PRAGSr    | Phosphoribosylglycinamide synthase                                               | (B488_08180)                                                    | Purine Metabolism                              |
| PRAIi     | Phosphoribosylanthranilate isomerase<br>(irreversible)                           | (B488_13090) or (B488_00850) or (B488_03030) or<br>(B488_03020) | Phenylalanine Tyrosine Tryptophan Biosynthesis |
| PRASCSi   | Phosphoribosylaminoimidazolesuccinocar-<br>boxamide synthase                     | (B488_05350)                                                    | Purine Metabolism                              |
| PRFGS     | Phosphoribosylformylglycinamide<br>synthase                                      | (B488_05310)                                                    | Purine Metabolism                              |
| PSP_L     | Phosphoserine phosphatase (L-serine)                                             | (B488_06380)                                                    | Glycine, Serine and threonine metabolism       |
| RIBabcpp  | D-ribose transport via ABC system<br>(periplasm)                                 | (B488_11480) or (B488_05640) or (B488_10540)                    | Transport                                      |
| RPE       | Ribulose 5-phosphate 3-epimerase                                                 | (B488_02730)                                                    | Pentose Phosphate Pathway                      |
| RPI       | Ribose-5-phosphate isomerase                                                     | (B488_07390)                                                    | Pentose Phosphate Pathway                      |
| SDPTA     | Succinyldiaminopimelate transaminase                                             | (B488_01500)                                                    | Lysine Biosynthesis                            |
| SERAT     | Serine O-acetyltransferase                                                       | (B488_03850)                                                    | Cysteine Metabolism                            |
| SERTRS    | Seryl-tRNA synthetase                                                            | (B488_11110)                                                    | Glycine, Serine and threonine metabolism       |
| SHCHF     | Sirohydrochlorin ferrochelatae                                                   | (B488_09610)                                                    | Porphyrin and Chlorophyll Metabolism           |
| SHK3Dr    | Shikimate dehydrogenase                                                          | (B488_13740)                                                    | Phenylalanine Tyrosine Tryptophan Biosynthesis |



|              |                                                                      |                                                                                                                                                          |                                                |
|--------------|----------------------------------------------------------------------|----------------------------------------------------------------------------------------------------------------------------------------------------------|------------------------------------------------|
| SOTA         | Succinylornithine transaminase                                       | (B488_01500)                                                                                                                                             | Arginine and Proline Metabolism                |
| SUCD1        | Succinate dehydrogenase                                              | (B488_07490) and (B488_07480) and (B488_07500)                                                                                                           | TCA Cycle                                      |
| SUCDi        | Succinate dehydrogenase (irreversible)                               | (B488_07490) and (B488_07480) and (B488_07500)                                                                                                           | TCA Cycle                                      |
| SULabcpp     | Sulfate transport via ABC system (periplasm)                         | (B488_00260)                                                                                                                                             | Sulfur Metabolism                              |
| TALA         | Transaldolase                                                        | (B488_09590) or (B488_05910)                                                                                                                             | Pentose Phosphate Pathway                      |
| TAURabcpp    | Taurine transport via ABC system (periplasm)                         | (B488_11480)                                                                                                                                             | Transport                                      |
| THRTRS       | Threonyl-tRNA synthetase                                             | (B488_06460)                                                                                                                                             | Glycine, Serine and threonine metabolism       |
| TPI          | Triose-phosphate isomerase                                           | (B488_04610)                                                                                                                                             | Gluconeogenesis                                |
| TRPS1        | Tryptophan synthase (indoleglycerol phosphate)                       | (B488_13070) or (B488_00380)                                                                                                                             | Phenylalanine Tyrosine Tryptophan Biosynthesis |
| TRPS2        | Tryptophan synthase (indole)                                         | (B488_13080) or (B488_09990)                                                                                                                             | Phenylalanine Tyrosine Tryptophan Biosynthesis |
| TSULabcpp    | Thiosulfate transport via ABC system (periplasm)                     | (B488_10770)                                                                                                                                             | Sulfur Metabolism                              |
| UPPN         | B-ureidopropionase                                                   | (B488_04780)                                                                                                                                             | Pantothenate and CoA Biosynthesis              |
| VANKpp       | VANKpp                                                               | (B488_06670) or (B488_05280)                                                                                                                             | Transport                                      |
| VANLNtex     | VANLNtex                                                             | (B488_06670) or (B488_05280)                                                                                                                             | Transport                                      |
| VANLTtex     | VANLTtex                                                             | (B488_06670) or (B488_05280)                                                                                                                             | Transport                                      |
| VNLNpp       | VNLNpp                                                               | (B488_06670) or (B488_05280)                                                                                                                             | Transport                                      |
| pentso3abcpp | Pentso3abcpp                                                         | (B488_11480)                                                                                                                                             | Transport                                      |
| 3PEPTabcpp   | Tripeptide (LalaDgluMdap) transport via ABC system (periplasm)       | ((B488_03240) and (B488_03270) and (B488_03250) and (B488_03240) and (B488_03260)) or ((B488_10540) and (B488_08860)) or ((B488_11480) and (B488_08860)) | Murein Recycling                               |
| 4PEPTabcpp   | Tetrapeptide (LalaDgluMdapDala) transport via ABC system (periplasm) | ((B488_03260) and (B488_03240) and (B488_03240) and (B488_03270) and (B488_03250)) or ((B488_10540) and (B488_08860)) or ((B488_08860) and (B488_11480)) | Murein Recycling                               |

|               |                                                                                                       |                                                                                                                                      |                                             |
|---------------|-------------------------------------------------------------------------------------------------------|--------------------------------------------------------------------------------------------------------------------------------------|---------------------------------------------|
| ACOLIPAabctex | Arabinose modified core oligosaccharide lipid A transport via ABC system (periplasm to extracellular) | ((B488_02420) and (B488_02430) and (B488_06930) and (B488_13000) and (B488_13010) and (B488_02410) and (B488_11650))                 | Lipopolysaccharide Biosynthesis / Recycling |
| ADCS          | 4-amino-4-deoxychorismate synthase                                                                    | ((B488_05820) and (B488_10810)) or (B488_13110)                                                                                      | Cofactor and Prosthetic Group Biosynthesis  |
| AGM3PApp      | N-Acetyl-D-glucosamine(anhydrous)N-Acetylmuramyl-tripeptide amidase (periplasm)                       | (B488_00740)                                                                                                                         | Murein Recycling                            |
| AGM4PApp      | N-Acetyl-D-glucosamine(anhydrous)N-Acetylmuramyl-tetrapeptide amidase (periplasm)                     | (B488_00740)                                                                                                                         | Murein Recycling                            |
| ALAALAabcpp   | D-alanyl-D-alanine (DalaDala) transport via ABC system (periplasm)                                    | ((B488_03270) and (B488_03250) and (B488_03260) and (B488_03240)) or ((B488_03260) and (B488_10540)) or (B488_06080) or (B488_08860) | Transport, Inner Membrane                   |
| ALATA_D2      | D-alanine transaminase                                                                                | (B488_10890)                                                                                                                         | Cofactor and Prosthetic Group Biosynthesis  |
| ALATA_L2      | Alanine transaminase                                                                                  | (B488_10890)                                                                                                                         | Cofactor and Prosthetic Group Biosynthesis  |
| ALAabcpp      | L-alanine transport via ABC system (periplasm)                                                        | ((B488_10260) and (B488_10280) and (B488_10270) and (B488_00950)) or (B488_00980) or ((B488_05380) and (B488_10290))                 | Transport, Inner Membrane                   |
| ASCBptsp      | L-ascorbate transport via PEP:Pyr PTS (periplasm)                                                     | ((B488_13600) and (B488_02780) and (B488_06020))                                                                                     | Transport, Inner Membrane                   |
| CGLYabcpp     | L-Cysteinylglycine (Cys-Gly) transport via ABC system (periplasm)                                     | ((B488_03250) and (B488_03270) and (B488_03240) and (B488_10540)) or ((B488_03260) and (B488_10540))                                 | Transport, Inner Membrane                   |
| CLIPAabctex   | Cold lipid A transport via ABC system (periplasm to extracellular)                                    | (B488_02430 and B488_13000 and B488_02420) or (B488_10260) or (B488_08860) or (B488_10150) or (B488_11480)                           | Lipopolysaccharide Biosynthesis / Recycling |
| CMtpp         | Chloramphenicol transport via TolC system                                                             | ((B488_09880) and (B488_09870) and (B488_09860)) or (B488_13370) or (B488_09950) or (B488_05630) or (B488_13390)                     | Transport, Outer Membrane                   |
| COLIPAPabctex | Core oligosaccharide lipid A diphosphate transport via ABC system (periplasm to extracellular)        | ((B488_02430) and (B488_06930) and (B488_13010) and (B488_13000) and (B488_02420))                                                   | Lipopolysaccharide Biosynthesis / Recycling |

|                  |                                                                                                                        |                                                                                                                                        |                                             |
|------------------|------------------------------------------------------------------------------------------------------------------------|----------------------------------------------------------------------------------------------------------------------------------------|---------------------------------------------|
| COLIPAabctex     | Core oligosaccharide lipid A transport via ABC system (periplasm to extracellular)                                     | ((B488_02430) and (B488_13010) and (B488_06930) and (B488_13000) and (B488_02420))                                                     | Lipopolysaccharide Biosynthesis / Recycling |
| CRNDabcpp        | D-carnitine transport via ABC system (periplasm)                                                                       | (B488_02250)                                                                                                                           | Transport, Inner Membrane                   |
| CYSSADS          | L-cysteine sulfinic acid desulfurase                                                                                   | (B488_08710))                                                                                                                          | Cysteine Metabolism                         |
| CYTB2pp          | Cytochrome oxidase bd (menaquinol-8: 2 protons) (periplasm)                                                            | (B488_10770) or ((B488_11480) and (B488_10780))                                                                                        | Oxidative Phosphorylation                   |
| DOXRBCNtpp       | Doxorubicin transport via TolC system                                                                                  | ((B488_09860) and (B488_09870) and (B488_09880)) or ((B488_05630) and (B488_13370)) or ((B488_13390) and (B488_09950)) or (B488_13380) | Transport, Outer Membrane                   |
| ECA4COLIPAabctex | Enterobacterial common antigen (x4) core oligosaccharide lipid A transport via ABC system (periplasm to extracellular) | ((B488_13010) and (B488_02420) and (B488_06930) and (B488_13000) and (B488_02430))                                                     | Lipopolysaccharide Biosynthesis / Recycling |
| ENLIPAabctex     | Phosphoethanolamine lipid A transport via ABC system (periplasm to extracellular)                                      | ((B488_06930) and (B488_13000) and (B488_02420) and (B488_02430) and (B488_13010))                                                     | Lipopolysaccharide Biosynthesis / Recycling |
| FUSAtpp          | Fusidic acid transport via TolC system                                                                                 | ((B488_09880) and (B488_09860) and (B488_09870)) or (B488_13370)                                                                       | Transport, Outer Membrane                   |
| GRXR             | Glutaredoxin reductase                                                                                                 | (B488_05290)                                                                                                                           | Unassigned                                  |
| GTHRDabcpp       | Reduced glutathione via ABC system (periplasm)                                                                         | ((B488_03260) and (B488_03250) and (B488_03270) and (B488_03240)) or (B488_10540) or (B488_08860)                                      | Transport, Inner Membrane                   |
| HPPK2            | 6-hydroxymethyl-dihydropterin pyrophosphokinase                                                                        | (B488_08090)                                                                                                                           | Cofactor and Prosthetic Group Biosynthesis  |
| INDOLEt2pp       | Indole transport via proton symport, irreversible (periplasm)                                                          | (B488_09880)                                                                                                                           | Transport, Inner Membrane                   |
| K2L4Aabctex      | KDO(2)-lipid IV A transport via ABC system (periplasm to extracellular)                                                | (B488_05650)                                                                                                                           | Lipopolysaccharide Biosynthesis / Recycling |
| KAS15            | Beta-ketoacyl-ACP synthase (2)                                                                                         | (B488_10100) or (B488_09730) or (B488_09740)                                                                                           | Membrane Lipid Metabolism                   |
| KDOPS            | 3-deoxy -D-manno-octulosonic -acid 8-phosphate synthase                                                                | (B488_10980)                                                                                                                           | Lipopolysaccharide Biosynthesis / Recycling |
| LIPAabctex       | Lipid A transport via ABC system (periplasm to extracellular)                                                          | (B488_05650)                                                                                                                           | Lipopolysaccharide Biosynthesis / Recycling |

|               |                                                                                                     |                                                                                                                                                                                                                                           |                                             |
|---------------|-----------------------------------------------------------------------------------------------------|-------------------------------------------------------------------------------------------------------------------------------------------------------------------------------------------------------------------------------------------|---------------------------------------------|
| MALTHXabcpp   | Maltohexaose transport via ABC system (periplasm)                                                   | (B488_10770) and (B488_10780) and (B488_10790)                                                                                                                                                                                            | Transport, Inner Membrane                   |
| MALPTabcpp    | Maltopentaose transport via ABC system (periplasm)                                                  | (B488_10770) and (B488_10780) and (B488_10790)                                                                                                                                                                                            | Transport, Inner Membrane                   |
| MALTTRabcpp   | Maltotriose transport via ABC system (periplasm)                                                    | (B488_10770) and (B488_10780) and (B488_10790)                                                                                                                                                                                            | Transport, Inner Membrane                   |
| MALTTTRabcpp  | Maltotetraose transport via ABC system (periplasm)                                                  | (B488_10770) and (B488_10780) and (B488_10790)                                                                                                                                                                                            | Transport, Inner Membrane                   |
| MALTabcpp     | Maltose transport via ABC system (periplasm)                                                        | (B488_10770) and (B488_10780) and (B488_10790)                                                                                                                                                                                            | Transport, Inner Membrane                   |
| MINCYCtpp     | Minocycline transport via TolC system                                                               | (B488_09870)                                                                                                                                                                                                                              | Transport, Outer Membrane                   |
| NADH17pp      | NADH dehydrogenase (menaquinone-8 & 3 protons) (periplasm)                                          | (B488_02570) and (B488_02580) and (B488_02590) and (B488_02600) and (B488_02610) and (B488_02620) and (B488_02630) and (B488_02640) and (B488_02650) and (B488_02660) and (B488_02670) and (B488_02680) and (B488_02690) and (B488_02700) | Oxidative Phosphorylation                   |
| NADH18pp      | NADH dehydrogenase (demethylmenaquinone-8 & 3 protons) (periplasm)                                  | (B488_02570) and (B488_02580) and (B488_02590) and (B488_02600) and (B488_02610) and (B488_02620) and (B488_02630) and (B488_02640) and (B488_02650) and (B488_02660) and (B488_02670) and (B488_02680) and (B488_02690) and (B488_02700) | Oxidative Phosphorylation                   |
| NADHHR        | NADH hydratase                                                                                      | (B488_12180)                                                                                                                                                                                                                              | Metabolite Repair                           |
| NADHHS        | NADH hydratase                                                                                      | (B488_12180)                                                                                                                                                                                                                              | Metabolite Repair                           |
| NADPHHR       | NADPH hydratase                                                                                     | (B488_12180)                                                                                                                                                                                                                              | Metabolite Repair                           |
| NADPHHS       | NADPH hydratase                                                                                     | (B488_12180)                                                                                                                                                                                                                              | Metabolite Repair                           |
| NADPHQR3      | NADPH Quinone Reductase (Menaquinone-8)                                                             | (B488_05890)                                                                                                                                                                                                                              | Oxidative Phosphorylation                   |
| NOVBCNtpp     | Novobiocin transport via TolC system                                                                | (B488_09870)                                                                                                                                                                                                                              | Transport, Outer Membrane                   |
| O16A4COLIPAab | O16 antigen (x4) core oligosaccharide lipid A transport via ABC system (periplasm to extracellular) | (B488_13000) and (B488_13010) and (B488_13020)                                                                                                                                                                                            | Lipopolysaccharide Biosynthesis / Recycling |
| OCTDPS        | Octaprenyl pyrophosphate synthase                                                                   | (B488_00690)                                                                                                                                                                                                                              | Cofactor and Prosthetic Group Biosynthesis  |

|             |                                                           |                                                                 |                                            |
|-------------|-----------------------------------------------------------|-----------------------------------------------------------------|--------------------------------------------|
| OMBZLM      | 2-Octaprenyl-6-methoxy-benzoquinol methylase              | (B488_00690)                                                    | Cofactor and Prosthetic Group Biosynthesis |
| RFAMPtpp    | Rifampin transport via TolC system                        | (B488_09870) or (B488_13370)                                    | Transport, Outer Membrane                  |
| RNDR3b      | Ribonucleoside-diphosphate reductase (CDP) (glutaredoxin) | (B488_03580) and (B488_03570)                                   | Nucleotide Salvage Pathway                 |
| RNDR4b      | Ribonucleoside-diphosphate reductase (UDP) (glutaredoxin) | (B488_02930)                                                    | Nucleotide Salvage Pathway                 |
| S2FE2SR     | SUF [2Fe-2S] regeneration                                 | (B488_08720) and (B488_02490) and (B488_08730) and (B488_08710) | Cofactor and Prosthetic Group Biosynthesis |
| S2FE2SS     | SUF [2Fe-2S] Synthesis                                    | (B488_08720) and (B488_02490) and (B488_08730) and (B488_08710) | Cofactor and Prosthetic Group Biosynthesis |
| S2FE2SS2    | SUF [2Fe-2S] Synthesis II                                 | (B488_08720) and (B488_02490) and (B488_08730) and (B488_08710) | Cofactor and Prosthetic Group Biosynthesis |
| S2FE2ST     | SUF [2Fe-2S] Transfer                                     | (B488_08720) and (B488_02490) and (B488_08730) and (B488_08710) | Cofactor and Prosthetic Group Biosynthesis |
| S4FE4SR     | SUF [4Fe-4S] Reduction                                    | (B488_08720) and (B488_02490) and (B488_08730) and (B488_08710) | Cofactor and Prosthetic Group Biosynthesis |
| S4FE4ST     | SUF [4Fe-4S] Transfer                                     | (B488_08720) and (B488_02490) and (B488_08730) and (B488_08710) | Cofactor and Prosthetic Group Biosynthesis |
| SCYSDS      | SUF Cysteine desulfuration                                | (B488_08710)                                                    | Cofactor and Prosthetic Group Biosynthesis |
| TTRCYCtpp   | Tetracycline transport via TolC system                    | (B488_09880)                                                    | Transport, Outer Membrane                  |
| UDCPDPS     | Undecaprenyl diphosphate synthase                         | (B488_00440)                                                    | Cofactor and Prosthetic Group Biosynthesis |
| BUTSO3abcpp | Butanesulfonate transport via ABC system (periplasm)      | ((B488_11480) and (B488_10550) and (B488_10780))                | Transport; Inner Membrane                  |
| FEex        | Iron transporter                                          | ((B488_04500) and (B488_11150)) or (B488_10030)                 | iron metabolism                            |
| FEpp        | Iron transporter                                          | ((B488_11150) and (B488_04500)) or (B488_10030) or (B488_08420) | iron metabolism                            |
| Kt3pp       | Potassium transport out via proton antiport (periplasm)   | (B488_06670) or (B488_09960)                                    | Inorganic Ion Transport and Metabolism     |
| SULFACabcpp | Sulfoacetate transport via ABC system (periplasm)         | (B488_11480)                                                    | Transport; Inner Membrane                  |
| THZPSN      | Thiazole phosphate synthesis                              | (B488_01030)                                                    | Cofactor and Prosthetic Group Biosynthesis |

**Supplementary Table 2.** Reactions present in BT-1 and absent in *C*Las strains

| Reaction ID | Reaction Name                                                | Subsystem                                  | General Subsystem     |
|-------------|--------------------------------------------------------------|--------------------------------------------|-----------------------|
| AASAD3      | L-aminoadipate-semialdehyde dehydrogenase (NADH              | Lysine Metabolism                          | Amino acid metabolism |
| AHSERL2     | O acetylhomoserine thiol lyase                               | Methionine Metabolism                      | Amino acid metabolism |
| ALATA_L     | L-alanine transaminase                                       | Alanine and Aspartate Metabolism           | Amino acid metabolism |
| ARGTRS      | Arginyl-tRNA synthetase                                      | Arginine and Proline Metabolism            | Amino acid metabolism |
| BETALDHx    | Betaine-aldehyde dehydrogenase                               | Glycine, Serine and threonine metabolism   | Amino acid metabolism |
| CHOLSH      | CHOLSH                                                       | Glycine, Serine and threonine metabolism   | Amino acid metabolism |
| CYSTGL      | Cystathionine g lyase                                        | Methionine Metabolism                      | Amino acid metabolism |
| CYSTL       | Cystathionine b-lyase                                        | Methionine Metabolism                      | Amino acid metabolism |
| G2PP        | Glycerol-2-phosphate phosphatase                             | Alternate Carbon Metabolism                | Amino acid metabolism |
| G5SD        | Glutamate-5-semialdehyde dehydrogenase                       | Arginine and Proline Metabolism            | Amino acid metabolism |
| GLUR        | Glutamate racemase                                           | Glutamate Metabolism                       | Amino acid metabolism |
| HPYRRx      | Hydroxypyruvate reductase (NADH)                             | Glycine, Serine and threonine metabolism   | Amino acid metabolism |
| HSERTA      | Homoserine O trans acetylase                                 | Methionine Metabolism                      | Amino acid metabolism |
| LYSMO       | LYSMO                                                        | Lysine Metabolism                          | Amino acid metabolism |
| METGL       | Methionine g lyase                                           | Methionine Metabolism                      | Amino acid metabolism |
| METS        | Methionine synthase                                          | Methionine Metabolism                      | Amino acid metabolism |
| METSOXR1    | L-methionine-S-oxide reductase                               | Methionine Metabolism                      | Amino acid metabolism |
| METSOXR2    | L-methionine-R-sulfoxide reductase                           | Methionine Metabolism                      | Amino acid metabolism |
| MMTSAO      | (S)-Methylmalonate semialdehyde:NAD <sup>+</sup> oxidoreduct | Valine, leucine and isoleucine degradation | Amino acid metabolism |
| MTRPOX      | N-methyltryptophan oxidase                                   | Glycine and Serine Metabolism              | Amino acid metabolism |
| OXPTNDH     | Glutarate-semialdehyde:NAD <sup>+</sup> oxidoreductase       | Lysine Metabolism                          | Amino acid metabolism |
| P5CD        | 1-pyrroline-5-carboxylate dehydrogenase                      | Arginine and Proline Metabolism            | Amino acid metabolism |
| P5CR        | Pyrroline-5-carboxylate reductase                            | Arginine and Proline Metabolism            | Amino acid metabolism |
| PGCD        | Phosphoglycerate dehydrogenase                               | Glycine, Serine and threonine metabolism   | Amino acid metabolism |
| PROD2       | Proline dehydrogenase                                        | Arginine and Proline Metabolism            | Amino acid metabolism |
| PROt2rpp    | L-proline reversible transport via proton symport (peri      | Arginine and Proline Metabolism            | Amino acid metabolism |
| SARCOX      | Sarcosine oxidase                                            | Glycine and Serine Metabolism              | Amino acid metabolism |
| SGSAD       | Succinylglutamic semialdehyde dehydrogenase                  | Arginine and Proline Metabolism            | Amino acid metabolism |
| SHSL1       | O-succinylhomoserine lyase (L-cysteine)                      | Methionine Metabolism                      | Amino acid metabolism |
| SLCYSS      | O-acetyl-L-serine sulfhydrylase                              | Cysteine Metabolism                        | Amino acid metabolism |
| TRPS1       | Tryptophan synthase (indoleglycerol phosphate)               | Phenylalanine Tyrosine Tryptophan Biosynth | Amino acid metabolism |
| TRPTRS      | Tryptophanyl-tRNA synthetase                                 | tRNA Charging                              | Amino acid metabolism |

|               |                                                                    |                            |                         |
|---------------|--------------------------------------------------------------------|----------------------------|-------------------------|
| FBA           | Fructose-bisphosphate aldolase                                     | Glycolysis                 | Carbohydrate metabolism |
| FBP           | Fructose-bisphosphatase                                            | Glycolysis                 | Carbohydrate metabolism |
| FRD2          | Fumarate reductase                                                 | Citric Acid Cycle          | Carbohydrate metabolism |
| FRD3          | Fumarate reductase                                                 | Citric Acid Cycle          | Carbohydrate metabolism |
| FRUpts        | D-fructose transport via PEP:Pyr PTS                               | Fructose Metabolism        | Carbohydrate metabolism |
| G6PI          | Glucose 6 phosphate isomerase                                      | Pentose Phosphate Pathway  | Carbohydrate metabolism |
| GADktp        | GADktp                                                             | Glycolysis                 | Carbohydrate metabolism |
| LDH_D         | D-lactate dehydrogenase                                            | Pyruvate Met               | Carbohydrate metabolism |
| PGLCNDH       | PGLCNDH                                                            | Glycolysis                 | Carbohydrate metabolism |
| 14GLUCANabcpp | 1,4-alpha-D-glucan transport via ABC system (periplasm)            | Transport, Inner Membrane  | Cell envelope           |
| ALAALAabcpp   | D-alanyl-D-alanine (DalaDala) transport via ABC system (periplasm) | Transport, Inner Membrane  | Cell envelope           |
| ALAabcpp      | L-alanine transport via ABC system (periplasm)                     | Transport, Inner Membrane  | Cell envelope           |
| CGLYabcpp     | L-Cysteinylglycine (Cys-Gly) transport via ABC system (periplasm)  | Transport, Inner Membrane  | Cell envelope           |
| CMtpp         | Chloramphenicol transport via TolC system                          | Transport, Outer Membrane  | Cell envelope           |
| CRNDt2rpp     | D-carnitine outward transport (H <sup>+</sup> antiport)            | Transport; Inner Membrane  | Cell envelope           |
| CRNt2rpp      | L-carnitine outward transport (H <sup>+</sup> antiport)            | Transport; Inner Membrane  | Cell envelope           |
| CTBTt2rpp     | Cronobetaine outward transport (H <sup>+</sup> antiport)           | Transport; Inner Membrane  | Cell envelope           |
| DOXRBCNtpp    | Doxorubicin transport via TolC system                              | Transport, Outer Membrane  | Cell envelope           |
| EAR100x       | Enoyl-[acyl-carrier-protein] reductase (NADH) (n-C10)              | Cell Envelope Biosynthesis | Cell envelope           |
| EAR121x       | Enoyl-[acyl-carrier-protein] reductase (NADH) (n-C12)              | Cell Envelope Biosynthesis | Cell envelope           |
| EAR180x       | Enoyl-[acyl-carrier-protein] reductase (NADH) (n-C18)              | Cell Envelope Biosynthesis | Cell envelope           |
| FUSAtpp       | Fusidic acid transport via TolC system                             | Transport, Outer Membrane  | Cell envelope           |
| GTHRDabcpp    | Reduced glutathione via ABC system (periplasm)                     | Transport, Inner Membrane  | Cell envelope           |
| INDOLEt2pp    | Indole transport via proton symport, irreversible (periplasm)      | Transport, Inner Membrane  | Cell envelope           |
| MALTHXabcpp   | Maltohexaose transport via ABC system (periplasm)                  | Transport, Inner Membrane  | Cell envelope           |
| MALTPTabcpp   | Maltopentaose transport via ABC system (periplasm)                 | Transport, Inner Membrane  | Cell envelope           |
| MALTTRabcpp   | Maltotriose transport via ABC system (periplasm)                   | Transport, Inner Membrane  | Cell envelope           |
| MALTTTRabcpp  | Maltotetraose transport via ABC system (periplasm)                 | Transport, Inner Membrane  | Cell envelope           |
| MALTabcpp     | Maltose transport via ABC system (periplasm)                       | Transport, Inner Membrane  | Cell envelope           |
| METDabcpp     | D-methionine transport via ABC system (periplasm)                  | Transport, Inner Membrane  | Cell envelope           |
| MI1PP         | Myo-inositol 1-phosphatase                                         | Cell Envelope Biosynthesis | Cell envelope           |
| MINCYCtpp     | Minocycline transport via TolC system                              | Transport, Outer Membrane  | Cell envelope           |
| NOVBCNtpp     | Novobiocin transport via TolC system                               | Transport, Outer Membrane  | Cell envelope           |
| PROGLYabcpp   | L-Prolinylglycine (Pro-Gly) transport via ABC system (periplasm)   | Transport, Inner Membrane  | Cell envelope           |

|             |                                                            |                                             |                                      |
|-------------|------------------------------------------------------------|---------------------------------------------|--------------------------------------|
| RFAMPtpp    | Rifampin transport via TolC system                         | Transport, Outer Membrane                   | Cell envelope                        |
| SULFACabcpp | Sulfoacetate transport via ABC system (periplasm)          | Transport; Inner Membrane                   | Cell envelope                        |
| TTRCYCtpp   | Tetracycline transport via TolC system                     | Transport, Outer Membrane                   | Cell envelope                        |
| CYTBD2pp    | Cytochrome oxidase bd (menaquinol-8: 2 protons) (pe        | Oxidative Phosphorylation                   | Energy metabolism                    |
| CYTBDpp     | Cytochrome oxidase bd (ubiquinol-8: 2 protons) (periplasm) | Oxidative Phosphorylation                   | Energy metabolism                    |
| GLU5K       | Glutamate 5-kinase                                         | Urea cycle/amino group metabolism           | Energy metabolism                    |
| NADPHQR3    | NADPH Quinone Reductase (Menaquinone-8)                    | Oxidative Phosphorylation                   | Energy metabolism                    |
| NADPHQR4    | NADPH Quinone Reductase (2-Demethylmenaquinone)            | Oxidative Phosphorylation                   | Energy metabolism                    |
| GLYALDDr    | D-Glyceraldehyde dehydrogenase                             | Glycerophospholipid Metabolism              | Fatty acid metabolism                |
| GLYALDtpp   | Glyceraldehyde facilitated diffusion (periplasm)           | Glycerophospholipid Metabolism              | Fatty acid metabolism                |
| 3PEPTabcpp  | Tripeptide (LalaDgluMdap) transport via ABC system         | Murein Recycling                            | Glycan biosynthesis and metabolism   |
| 4PEPTabcpp  | Tetrapeptide (LalaDgluMdapDala) transport via ABC system   | Murein Recycling                            | Glycan biosynthesis and metabolism   |
| AGM3PAApp   | N-Acetyl-D-glucosamine(anhydrous)N-Acetylmuramy            | Murein Recycling                            | Glycan biosynthesis and metabolism   |
| AGM4PAApp   | N-Acetyl-D-glucosamine(anhydrous)N-Acetylmuramy            | Murein Recycling                            | Glycan biosynthesis and metabolism   |
| KDOCT2      | 3-deoxy-manno-octulosonate cytidyltransferase              | Lipopolysaccharide Biosynthesis / Recycling | Glycan biosynthesis and metabolism   |
| UHGADA      | UDP-3-O-acetylglucosamine deacetylase                      | Lipopolysaccharide Biosynthesis / Recycling | Metabolism of cofactors and vitamins |
| ADCS        | 4-amino-4-deoxychorismate synthase                         | Cofactor and Prosthetic Group Biosynthesis  | Metabolism of cofactors and vitamins |
| AMPMS2      | 4-amino-2-methyl-5-phosphomethylpyrimidine synthase        | Thiamine Metabolism                         | Metabolism of cofactors and vitamins |
| ASP1DC      | Aspartate 1-decarboxylase                                  | Cofactor and Prosthetic Group Biosynthesis  | Metabolism of cofactors and vitamins |
| DHPS        | Dihydropteroate synthase                                   | Folate Biosynthesis                         | Metabolism of cofactors and vitamins |
| DHPS2       | Dihydropteroate synthase                                   | Cofactor and Prosthetic Group Biosynthesis  | Metabolism of cofactors and vitamins |
| HMPK1       | Hydroxymethylpyrimidine kinase (ATP)                       | Thiamine Metabolism                         | Metabolism of cofactors and vitamins |



|             |                                                     |                                            |                                           |
|-------------|-----------------------------------------------------|--------------------------------------------|-------------------------------------------|
| HPPK2       | 6-hydroxymethyl-dihydropterin pyrophosphokinase     | Cofactor and Prosthetic Group Biosynthesis | Metabolism of cofactors and vitamins      |
| NADDP       | NAD diphosphatase                                   | Cofactor and Prosthetic Group Biosynthesis | Metabolism of cofactors and vitamins      |
| NMNDA       | Nicotinamide-nucleotide amidase                     | Cofactor and Prosthetic Group Biosynthesis | Metabolism of cofactors and vitamins      |
| NNAM        | Nicotinamidase                                      | Cofactor and Prosthetic Group Biosynthesis | Metabolism of cofactors and vitamins      |
| THZPSN      | Thiazole phosphate synthesis                        | Cofactor and Prosthetic Group Biosynthesis | Metabolism of cofactors and vitamins      |
| UDCPDPS     | Undecaprenyl diphosphate synthase                   | Cofactor and Prosthetic Group Biosynthesis | Metabolism of cofactors and vitamins      |
| NADPHQR2    | NADPH Quinone Reductase (Ubiquinone-8)              | others                                     | Metabolism of other amino acids           |
| ADK3        | Adentylate kinase (GTP)                             | Nucleotide Salvage Pathway                 | Nucleotide metabolism                     |
| ADK4        | Adentylate kinase (ITP)                             | Nucleotide Salvage Pathway                 | Nucleotide metabolism                     |
| ADNK1       | Adenosine kinase                                    | Nucleotide Salvage Pathway                 | Nucleotide metabolism                     |
| GTPDPDP     | Guanosine-5-triphosphate,3-diphosphate diphosphatas | Purine Metabolism                          | Nucleotide metabolism                     |
| GTPDPK      | GTP diphosphokinase                                 | Purine Metabolism                          | Nucleotide metabolism                     |
| GUAPRT      | Guanine phosphoribosyltransferase                   | Purine Metabolism                          | Nucleotide metabolism                     |
| PPGPPDP     | Guanosine-3,5-bis(diphosphate) 3-diphosphatase      | Purine Metabolism                          | Nucleotide metabolism                     |
| 3OXOADPt_pp | 3OXOADPt LPAREN pp RPAREN                           | B-Ketoadipate pathway                      | Xenobiotics biodegradation and metabolism |
| COALDDH     | COALDDH                                             | B-Ketoadipate pathway                      | Xenobiotics biodegradation and metabolism |
| VNDH        | VNDH                                                | B-Ketoadipate pathway                      | Xenobiotics biodegradation and metabolism |
| VNDH_2      | 4-hydroxybenzaldehyde dehydrogenase                 | B-Ketoadipate pathway                      | Xenobiotics biodegradation and metabolism |
| VNDH_3      | VNDH 3                                              | B-Ketoadipate pathway                      | Xenobiotics biodegradation and metabolism |

---

**Supplementary Table 3.** Culture media compositions and imposed constraints

| Components                             | Reaction ID  | BM-7<br>(mg/L) | M13<br>(mg/L) | M14<br>(mg/L) | M15<br>(mg/L) |
|----------------------------------------|--------------|----------------|---------------|---------------|---------------|
| <b>Inorganic salts</b>                 |              |                |               |               |               |
| Calcium chloride dehydrate             |              | 165            | 1320          | 1320          | 1320          |
| Magnesium chloride anhydrous           |              | 1068.2         | 1068.2        | 1068.2        | 1068.2        |
| Ammonium sulfate anhydrous             |              | 98             | 1356.7        | 1356.7        | 1356.7        |
| Potassium chloride                     | EX_so4_e     | 3750           | 2240          | 2240          | 2240          |
| Sodium phosphate monobasic monohydrate | EX_pi_e      | 125            | 1007          | 1007          | 1007          |
| <b>Amino acids</b>                     |              |                |               |               |               |
| L/β-alanine                            | EX_ala__L_e  | 447.25         | 447.25        | 447.25        | 447.25        |
| L-arginine-HCl                         | EX_arg__L_e  | 1777           | 1777          | 1777          | 1777          |
| L-asparagine monohydrate               | EX_asp__L_e  | 1075.45        | 1075.45       | 1075.45       | 1075.45       |
| L-aspartic acid                        | EX_asn__L_e  | 818.6          | 818.6         | 818.6         | 818.6         |
| L-cystine-2HCl                         | EX_cys__L_e  | 56.38          | 56.38         | 56.38         | 56.38         |
| L-glutamic acid                        | EX_glu__L_e  | 1502.2         | 1502.2        | 1502.2        | 1502.2        |
| L-glutamine                            | EX_glu__L_e  | 358.04         | 358.04        | 358.04        | 358.04        |
| Glycine                                | EX_gly_e     | 859.512        | 859.512       | 859.512       | 859.512       |
| L-histidine hydrochloride monohydrate  | EX_his__L_e  | 2366.11        | 2366.11       | 2366.11       | 2366.11       |
| L-isoleucine                           | EX_ile__L_e  | 687.36         | 687.36        | 687.36        | 687.36        |
| L-leucine                              | EX_leu__L_e  | 592.89         | 592.89        | 592.89        | 592.89        |
| L-lysine-HCl                           | EX_lys__L_e  | 1464.85        | 1464.85       | 1464.85       | 1464.85       |
| L-methionine                           | EX_met__L_e  | 678.9          | 678.9         | 678.9         | 678.9         |
| L-phenylalanine                        | EX_phe__L_e  | 789.62         | 789.62        | 789.62        | 789.62        |
| L-proline                              | EX_pro__L_e  | 940.61         | 940.61        | 940.61        | 940.61        |
| DL-serine                              | EX_ser__L_e  | 944.76         | 944.76        | 944.76        | 944.76        |
| L-threonine                            | EX_thr__L_e  | 459.8          | 459.8         | 459.8         | 459.8         |
| L-tryptophan                           | EX_trp__L_e  | 373.73         | 373.73        | 373.73        | 373.73        |
| L-tyrosine disodium salt               | EX_tyr__L_e  | 391.37         | 391.37        | 391.37        | 391.37        |
| L-valine                               | EX_val__L_e  | 644.31         | 644.31        | 644.31        | 644.31        |
| Betaine                                | EX_glyb_e    | 0.31           | 0.31          | 0.31          | 0.31          |
| Ornithine                              | EX_orn_e     | 229.96         | 229.96        | 229.96        | 229.96        |
| Methionine sulfoxide                   |              | 18.2           | 18.2          | 18.2          | 18.2          |
| <b>Vitamins</b>                        |              |                |               |               |               |
| Biotin                                 | EX_btn_e     | 0              | 0.1           | 0.1           | 0.1           |
| Choline Chloride                       |              | 0              | 1000          | 1000          | 1000          |
| Folic Acid                             |              | 0              | 0.2           | 0.2           | 0.2           |
| Myo-Inositol                           | EX_ins_e     | 0              | 0.2           | 0.2           | 0.2           |
| Niacin                                 | EX_nac_e     | 0              | 0.2           | 0.2           | 0.2           |
| D-Calcium pantothenate                 | EX_pnto__R_e | 0              | 0.2           | 0.2           | 0.2           |

|                               |             |       |     |      |      |
|-------------------------------|-------------|-------|-----|------|------|
| Para-aminobenzoic acid (PABA) | EX_4abz_e   | 0     | 0.2 | 0.2  | 0.2  |
| Pyridoxine-HCl                |             | 0     | 0.2 | 0.2  | 0.2  |
| Riboflavin                    | EX_ribflv_e | 0     | 0.2 | 0.2  | 0.2  |
| Thiamine-HCl                  | EX_thm_e    | 0     | 0.2 | 0.2  | 0.2  |
| Urea                          | EX_urea_e   | 290   | 0   | 0    | 0    |
| <b>Organic acids</b>          |             |       |     |      |      |
| Citric acid                   | EX_cit_e    | 0     | 0   | 0    | 2500 |
| a-ketoglutarate               | EX_akg_e    | 2000  | 0   | 0    | 0    |
| ACES                          |             | 10000 | 0   | 0    | 0    |
| malate                        | EX_mal__L_e | 0     | 0   | 4.64 | 4.64 |
| fumarate                      | EX_fum_e    | 0     | 0   | 4.8  | 4.8  |
| maltose                       |             | 0     | 0   | 616  | 616  |
| fructose                      | EX_fru_e    | 0     | 0   | 293  | 293  |
| succinate                     | EX_succ_e   | 0     | 0   | 8.27 | 8.27 |
| Glucose                       | EX_glc__D_e | 1250  | 0   | 5667 | 5667 |

---

| <b>Reaction ID*</b> | <b>BM-7<br/>(mmol/gD<br/>W/h)</b> | <b>M13<br/>(mmol/gD<br/>W/h)</b> | <b>M14<br/>(mmol/gD<br/>W/h)</b> | <b>M15<br/>(mmol/gD<br/>W/h)</b> | <b>Roots<br/>(mmol/gD<br/>W/h)</b> |
|---------------------|-----------------------------------|----------------------------------|----------------------------------|----------------------------------|------------------------------------|
| EX_glc__D_e         | -1.500                            | 0.000                            | -1.500                           | -1.500                           | -10                                |
| EX_so4_e            | -100.000                          | -100.000                         | -100.000                         | -100.000                         | -100                               |
| EX_pi_e             | -100.000                          | -100.000                         | -100.000                         | -100.000                         | -100                               |
| EX_ala__L_e         | -0.130                            | -0.519                           | -0.130                           | -0.130                           | 0                                  |
| EX_arg__L_e         | -0.516                            | -2.063                           | -0.516                           | -0.516                           | 0                                  |
| EX_asp__L_e         | -0.212                            | -0.212                           | -0.212                           | -0.212                           | 0                                  |
| EX_asn__L_e         | -0.238                            | -0.950                           | -0.238                           | -0.238                           | 0                                  |
| EX_cys__L_e         | -0.016                            | -0.065                           | -0.016                           | -0.016                           | 0                                  |
| EX_glu__L_e         | -0.436                            | -1.744                           | -0.436                           | -0.436                           | 0                                  |
| EX_gln__L_e         | -0.104                            | -0.104                           | -0.104                           | -0.104                           | 0                                  |
| EX_gly_e            | -0.249                            | -0.998                           | -0.249                           | -0.249                           | 0                                  |
| EX_his__L_e         | -0.687                            | -2.747                           | -0.687                           | -0.687                           | 0                                  |
| EX_ile__L_e         | -0.199                            | -0.798                           | -0.199                           | -0.199                           | 0                                  |
| EX_leu__L_e         | -0.172                            | -0.688                           | -0.172                           | -0.172                           | 0                                  |
| EX_lys__L_e         | -0.425                            | -1.700                           | -0.425                           | -0.425                           | 0                                  |
| EX_met__L_e         | -0.197                            | -0.788                           | -0.197                           | -0.197                           | 0                                  |
| EX_phe__L_e         | -0.229                            | -0.917                           | -0.229                           | -0.229                           | 0                                  |
| EX_pro__L_e         | -0.273                            | -1.092                           | -0.273                           | -0.273                           | 0                                  |
| EX_ser__L_e         | -0.274                            | -0.174                           | -0.274                           | -0.274                           | 0                                  |
| EX_thr__L_e         | -0.133                            | -0.534                           | -0.133                           | -0.133                           | 0                                  |
| EX_trp__L_e         | -0.108                            | -0.434                           | -0.108                           | -0.108                           | 0                                  |
| EX_tyr__L_e         | -0.114                            | -0.454                           | -0.114                           | -0.114                           | 0                                  |
| EX_val__L_e         | -0.187                            | -0.748                           | -0.187                           | -0.187                           | 0                                  |
| EX_glyb_e           | -0.050                            | -0.200                           | -0.050                           | -0.050                           | 0                                  |
| EX_orn_e            | -0.250                            | -0.250                           | -0.250                           | -0.250                           | 0                                  |
| EX_btn_e            | 0.000                             | -0.010                           | -0.010                           | -0.010                           | 0                                  |
| EX_ins_e            | 0.000                             | -0.020                           | -0.020                           | -0.020                           | 0                                  |
| EX_nac_e            | 0.000                             | -0.020                           | -0.020                           | -0.020                           | 0                                  |
| EX_pnto__R_e        | 0.000                             | -0.020                           | -0.020                           | -0.020                           | 0                                  |
| EX_4abz_e           | 0.000                             | -0.020                           | -0.020                           | -0.020                           | 0                                  |
| EX_ribflv_e         | 0.000                             | -0.020                           | -0.020                           | -0.020                           | 0                                  |
| EX_thm_e            | 0.000                             | -0.020                           | -0.020                           | -0.020                           | -10                                |
| EX_urea_e           | -0.200                            | 0.000                            | 0.000                            | 0.000                            | 0                                  |
| EX_cit_e            | 0.000                             | 0.000                            | 0.000                            | -0.150                           | 0                                  |
| EX_akg_e            | -0.350                            | 0.000                            | 0.000                            | 0.000                            | 0                                  |
| EX_mal__L_e         | 0.000                             | 0.000                            | -0.010                           | -0.010                           | 0                                  |
| EX_fum_e            | 0.000                             | 0.000                            | -0.010                           | -0.010                           | 0                                  |

|              |          |          |          |          |      |
|--------------|----------|----------|----------|----------|------|
| EX_fru_e     | 0.000    | 0.000    | -0.200   | -0.200   | -10  |
| EX_succ_e    | 0.000    | 0.000    | -0.020   | -0.020   | 0    |
| EX_cobalt2_e | -100.000 | -100.000 | -100.000 | -100.000 | -100 |
| EX_fe2_e     | -100.000 | -100.000 | -100.000 | -100.000 | -100 |
| EX_h2_e      | -100.000 | -100.000 | -100.000 | -100.000 | -100 |
| EX_h2o_e     | -100.000 | -100.000 | -100.000 | -100.000 | -100 |
| EX_h_e       | -100.000 | -100.000 | -100.000 | -100.000 | -100 |
| EX_na1_e     | -100.000 | -100.000 | -100.000 | -100.000 | -100 |
| EX_nh4_e     | -100.000 | -100.000 | -100.000 | -100.000 | -5   |
| EX_o2_e      | -0.015   | -0.015   | -0.015   | -0.015   | -100 |
| EX_no3_e     | 0        | 0        | 0        | 0        | -100 |

\*Uptake rates were calculated based on experimentally observed maximum citrate consumption rates of 0.15 mmol/gDW/h. This uptake rate calculated for 13 mM of citrate in M15 culture media, when the culture achieved OD=0.65 in 285 h. Each metabolite uptake rate was adjusted based on their concentration in the culture media and molecular weight

$$13 \text{ mM} = \frac{13 \text{ mmol}}{L} \cdot \frac{192 \text{ mg}}{1 \text{ mmol}} \cdot \frac{1}{0.3 \frac{\text{gDW}}{L}} \cdot \frac{1}{285 \text{ h}} = 30 \frac{\text{mg}}{\text{gDW h}} = 0.15 \frac{\text{mmol}}{\text{gDW h}}$$





**Supplementary Table 5.** Preprocessing results of RNA-sequencing data (metadata)

| <b>Sample</b>                   | <b>Sample ID</b> | <b>BioProject number</b> | <b>BioSample number</b> | <b>Raw Reads</b> | <b>After_Trim</b> | <b>Bacterial rRNA abundance</b> | <b>After Trim rRNA</b> |
|---------------------------------|------------------|--------------------------|-------------------------|------------------|-------------------|---------------------------------|------------------------|
| Phloem from cultivar seven      | S2               | PRJNA509215              | SAMN1057417             | 30672168         | 30631057          | 81.08%                          | 5794478                |
|                                 | S23              | PRJNA509215              | SAMN1057418             | 1908993688       | 1903100504        | 80.10%                          | 94670523               |
| Phloem from cultivar washington | S7               | PRJNA509215              | SAMN1057418             | 24922041         | 22780749          | 56.80%                          | 9840815                |
|                                 | S8               | PRJNA509215              | SAMN1057418             | 8456409          | 8372787           | 30.36%                          | 5831076                |
|                                 | S9               | PRJNA509215              | SAMN1057418             | 14144915         | 14086749          | 58.66%                          | 5823961                |
| Phloem from cultivar tango      | S21              | PRJNA509215              | SAMN1057418             | 1829659200       | 1767973740        | 50.23%                          | 219961284              |
|                                 | S22              | PRJNA509215              | SAMN1057418             | 508233228        | 475811112         | 25.99%                          | 88042503               |
| ACP alimentary canals           | S19              | PRJNA509215              | SAMN1057418             | 47653173         | 47205209          | 72.15%                          | 13146872               |
|                                 | S20              | PRJNA509215              | SAMN1057418             | 38361432         | 36064109          | 26.52%                          | 26499381               |



| <b>Citrus (%)</b> | <b>After Trim<br/>Citrus</b> | <b>After Trim<br/>psyllid</b> | <b>CLas<br/>psy62<br/>(%)</b> | <b>Reads CLas<br/>psy62</b> | <b>CLas A4<br/>(%)</b> | <b>Reads<br/>CLas A4</b> | <b>CLas FL17<br/>(%)</b> | <b>Reads<br/>CLas<br/>FL17</b> | <b>CLas gxpsy<br/>(%)</b> |
|-------------------|------------------------------|-------------------------------|-------------------------------|-----------------------------|------------------------|--------------------------|--------------------------|--------------------------------|---------------------------|
| 78.32%            | 1256133                      | 1256133                       | 0.39%                         | 4853                        | 0.38%                  | 4761                     | 0.38%                    | 4811                           | 0.40%                     |
| 85.19%            | 14017480                     | 14017480                      | 0.52%                         | 72858                       | 0.51%                  | 71088                    | 0.51%                    | 72050                          | 0.53%                     |
| 83.97%            | 1577319                      | 1577319                       | 0.12%                         | 1961                        | 0.13%                  | 1985                     | 0.12%                    | 1956                           | 0.13%                     |
| 80.60%            | 1131307                      | 1131307                       | 0.16%                         | 1769                        | 0.16%                  | 1780                     | 0.16%                    | 1767                           | 0.16%                     |
| 83.09%            | 984932                       | 984932                        | 0.14%                         | 1338                        | 0.14%                  | 1351                     | 0.14%                    | 1332                           | 0.14%                     |
| 91.47%            | 18761011                     | 18761011                      | 0.13%                         | 24434                       | 0.13%                  | 24456                    | 0.13%                    | 24296                          | 0.13%                     |
| 92.75%            | 6380258                      | 6380258                       | 0.48%                         | 30726                       | 0.48%                  | 30902                    | 0.48%                    | 30640                          | 0.49%                     |
| 0.39%             | 13095939                     | 4245182                       | 1.69%                         | 71842                       | 1.69%                  | 71917                    | 1.69%                    | 71695                          | 1.70%                     |
| 0.33%             | 26412346                     | 6014036                       | 3.33%                         | 200151                      | 3.33%                  | 200487                   | 3.32%                    | 199679                         | 3.35%                     |

| <b>Reads</b> |                  |                   |                    | <b>Reads</b>  |                  |                  |
|--------------|------------------|-------------------|--------------------|---------------|------------------|------------------|
| <b>CLas</b>  | <b>CLas</b>      | <b>Reads CLas</b> | <b>CLas Ishi-1</b> | <b>CLas</b>   | <b>CLas BT-1</b> | <b>Reads</b>     |
| <b>gxpsy</b> | <b>YCPsy (%)</b> | <b>YCPsy</b>      | <b>(%)</b>         | <b>Ishi-1</b> | <b>1 (%)</b>     | <b>CLas BT-1</b> |
| 6288         | 0.38%            | 4792              | 0.33%              | 4100          | 0.08%            | 1036             |
| 74516        | 0.51%            | 71756             | 0.44%              | 62255         | 0.12%            | 16447            |
| 2854         | 0.12%            | 1959              | 0.12%              | 1903          | 0.04%            | 626              |
| 3048         | 0.16%            | 1774              | 0.15%              | 1724          | 0.03%            | 354              |
| 2250         | 0.14%            | 1343              | 0.13%              | 1306          | 0.03%            | 305              |
| 24792        | 0.13%            | 24261             | 0.12%              | 22803         | 0.04%            | 7835             |
| 31101        | 0.48%            | 30705             | 0.47%              | 30241         | 0.08%            | 4983             |
| 72363        | 1.69%            | 71717             | 1.64%              | 69789         | 0.23%            | 9879             |
| 201433       | 3.32%            | 199945            | 3.21%              | 193218        | 0.40%            | 23758            |

**Supplementary Table 6. Analysis of RNA-sequencing data**

| Unique essential genes |                                    |             | Unique no essential genes |                                          |             |
|------------------------|------------------------------------|-------------|---------------------------|------------------------------------------|-------------|
| Gene                   | Subsystem                          | Reaction ID | Gene                      | Subsystem                                | Reaction ID |
| <b>C Las A4</b>        |                                    |             | <b>C Las A4</b>           |                                          |             |
| VBICanLib130745_0017   | Glycolysis                         | ME1         | VBICanLib130745_0192      | Methionine Metabolism                    | FMETTRS     |
| VBICanLib130745_0058   | Transport                          | ARGabcpp    | VBICanLib130745_0396      | TCA Cycle                                | ICL         |
| VBICanLib130745_0085   | Oxidative Phosphorylation          | CYTBO3_4pp  | VBICanLib130745_0528      | Pentose Phosphate Pathway                | GND         |
| VBICanLib130745_0171   | Purine and Pyrimidine Biosynthesis | DHORD2      | VBICanLib130745_0564      | Glycine, Serine and threonine metabolism | SERTRS      |
| VBICanLib130745_0173   | Gluconeogenesis                    | PGM         | VBICanLib130745_0850      | Glycine, Serine and threonine metabolism | GLYCK       |
| VBICanLib130745_0190   | Urea cycle/amino group metabolism  | AGPR        | VBICanLib130745_1000      | TCA Cycle                                | AKGDH       |
| VBICanLib130745_0225   | Urea cycle/amino group metabolism  | ACGS        | <b>C Las FL17</b>         |                                          |             |
| VBICanLib130745_0319   | Nucleotide Salvage Pathway         | RNDR1b      | RH08_00340                | Purine Metabolism                        | ADSL2r      |
| VBICanLib130745_0325   | Phenylalanine Tyrosine Tryptophan  | LANPRT      | RH08_01630                | TCA Cycle                                | ACONT       |
| VBICanLib130745_0355   | Gluconeogenesis                    | PYK         | RH08_01780                | TCA Cycle                                | ICL         |
| VBICanLib130745_0371   | Nicotinate and Nicotinamide        | NAMNPP      | RH08_02935                | Oxidative Phosphorylation                | ATPS4rpp    |
| VBICanLib130745_0402   | Urea cycle/amino group metabolism  | ACGK        | RH08_02940                | Oxidative Phosphorylation                | ATPS4rpp    |
| VBICanLib130745_0464   | Nucleotide Salvage Pathway         | URIDK2r     | RH08_02945                | Oxidative Phosphorylation                | ATPS4rpp    |
| VBICanLib130745_0477   | Nucleotide Salvage Pathway         | RNDR4b      | RH08_02950                | Oxidative Phosphorylation                | ATPS4rpp    |
| VBICanLib130745_0501   | Transport                          | FERtex      | RH08_02955                | Oxidative Phosphorylation                | ATPS4rpp    |
| VBICanLib130745_0549   | Glutamate Metabolism               | GTHS        | RH08_03970                | TCA Cycle                                | ICDHyr      |
| VBICanLib130745_0592   | Gluconeogenesis                    | ENO         | RH08_04000                | Transport                                | CITtex      |
| VBICanLib130745_0593   | Gluconeogenesis                    | PGK         | RH08_04040                | Glycine, Serine and threonine metabolism | GLYCK       |
| VBICanLib130745_0689   | Pentose Phosphate Pathway          | TKT1        | RH08_04645                | TCA Cycle                                | SUCD1       |
| VBICanLib130745_0690   | Transport                          | FE2abc      | RH08_04675                | TCA Cycle                                | SUCOAS      |
| VBICanLib130745_0691   | Transport                          | CHLabcpp    | RH08_04685                | TCA Cycle                                | AKGDa       |
| VBICanLib130745_0745   | Fatty Acid Biosynthesis            | EAR141y     | RH08_04855                | Oxidative Phosphorylation                | ATPS4rpp    |
| VBICanLib130745_0746   | Glycolysis                         | PGL         | <b>C Las gxpsy</b>        |                                          |             |
| VBICanLib130745_0747   | Glycolysis                         | G6PBDH      | VBICanLib238577_0375      | TCA Cycle                                | ICL         |
| VBICanLib130745_0753   | Fatty Acid Biosynthesis            | ACOATA      | VBICanLib238577_0964      | TCA Cycle                                | SUCD1       |
| VBICanLib130745_0785   | Methane Metabolism                 | FDH         | VBICanLib238577_0965      | Alanine and Aspartate Metabolism         | ASPO1       |
| VBICanLib130745_0786   | Methane Metabolism                 | FDH         | VBICanLib238577_0966      | TCA Cycle                                | SUCD1       |
| VBICanLib130745_0787   | Transport                          | ETHSO3abcpp | VBICanLib238577_0973      | TCA Cycle                                | AKGDa       |
| VBICanLib130745_0814   | Urea cycle/amino group metabolism  | UREA        | <b>C Las Ishi-1</b>       |                                          |             |
| VBICanLib130745_0823   | Transport                          | THRabcpp    | Ishi_547                  | Transport                                | FUMtex      |

|                      |                                      |             |                     |                                          |           |
|----------------------|--------------------------------------|-------------|---------------------|------------------------------------------|-----------|
| VBICanLib130745_0855 | Glycolysis                           | G6PDH2r     | Ishi_559            | Transport                                | FUMt2_2pp |
| VBICanLib130745_0879 | Glycine, Serine and threonine metabo | GHMT2r      | Ishi_974            | TCA Cycle                                | SUCD1     |
| VBICanLib130745_0900 | Glycine, Serine and threonine metabo | PSP_L       | Ishi_975            | Alanine and Aspartate Metabolism         | ASPO1     |
| VBICanLib130745_0909 | Transport                            | ICITex      | Ishi_976            | TCA Cycle                                | SUCD1     |
| VBICanLib130745_0910 | Unassigned                           | GRXR        | Ishi_982            | TCA Cycle                                | AKGDH     |
| VBICanLib130745_0946 | Nicotinate and Nicotinamide          | NADS1       | Ishi_986            | Glycine, Serine and threonine metabolism | GLYCL     |
| VBICanLib130745_0989 | Arginine and Proline Metabolism      | ORNCD       | <b>CLas psy62</b>   |                                          |           |
| VBICanLib130745_0997 | TCA Cycle                            | MDH         | VBICanLib64949_0386 | TCA Cycle                                | ICL       |
| VBICanLib130745_1112 | Transport                            | LEUabcpp    | VBICanLib64949_0525 | Pentose Phosphate Pathway                | GND       |
| <b>CLas FL17</b>     |                                      |             | VBICanLib64949_0562 | Glycine, Serine and threonine metabolism | SERTRS    |
| <b>CLas gxpsy</b>    |                                      |             | VBICanLib64949_0837 | Glycine, Serine and threonine metabolism | GLYCK     |
| VBICanLib238577_0068 | Oxidative Phosphorylation            | CYTBO3_4pp  | VBICanLib64949_0986 | TCA Cycle                                | AKGDH     |
| VBICanLib238577_0156 | Purine and Pyrimidine Biosynthesis   | DHORD2      | <b>CLas YCPsy</b>   |                                          |           |
| VBICanLib238577_0158 | Gluconeogenesis                      | PGM         | AL011_00280         | Purine Metabolism                        | ADSL2r    |
| VBICanLib238577_0175 | Urea cycle/amino group metabolism    | AGPR        | AL011_00345         | Transport                                | FUMt2_2pp |
| VBICanLib238577_0209 | Urea cycle/amino group metabolism    | ACGS        | AL011_01575         | TCA Cycle                                | ACONT     |
| VBICanLib238577_0325 | Glutamate Metabolism                 | ABTA        | AL011_01725         | TCA Cycle                                | ICL       |
| VBICanLib238577_0335 | Gluconeogenesis                      | PYK         | AL011_03900         | TCA Cycle                                | ICDHyr    |
| VBICanLib238577_0350 | Nicotinate and Nicotinamide          | NAMNPP      | AL011_03930         | Transport                                | CITex     |
| VBICanLib238577_0381 | Urea cycle/amino group metabolism    | ACGK        | AL011_03970         | Glycine, Serine and threonine metabolism | GLYCK     |
| VBICanLib238577_0439 | Pentose Phosphate Pathway            | TKT2        | AL011_04590         | TCA Cycle                                | SUCD1     |
| VBICanLib238577_0444 | Peptidoglycan Biosynthesis           | UGMDDS      | AL011_04620         | TCA Cycle                                | SUCOAS    |
| VBICanLib238577_0457 | Nucleotide Salvage Pathway           | RNDR4b      | AL011_04630         | TCA Cycle                                | AKGDa     |
| VBICanLib238577_0569 | Vitamin B6 Metabolism                | E4PD        |                     |                                          |           |
| VBICanLib238577_0570 | Gluconeogenesis                      | PGK         |                     |                                          |           |
| VBICanLib238577_0719 | One Carbon pool by folate            | MTHFC       |                     |                                          |           |
| VBICanLib238577_0720 | Glycolysis                           | PGL         |                     |                                          |           |
| VBICanLib238577_0727 | Fatty Acid Biosynthesis              | ACOATA      |                     |                                          |           |
| VBICanLib238577_0758 | Methane Metabolism                   | FDH         |                     |                                          |           |
| VBICanLib238577_0759 | Methane Metabolism                   | FDH         |                     |                                          |           |
| VBICanLib238577_0760 | Transport                            | ETHSO3abcpp |                     |                                          |           |
| VBICanLib238577_0825 | Pentose Phosphate Pathway            | TKT1        |                     |                                          |           |
| VBICanLib238577_0839 | Valine, Leucine, and Isoleucine Metz | ILETRS      |                     |                                          |           |
| VBICanLib238577_0850 | Glutamate Metabolism                 | GF6PTA      |                     |                                          |           |

|                      |                        |          |
|----------------------|------------------------|----------|
| VBICanLib238577_0879 | Transport              | ICITtex  |
| VBICanLib238577_0880 | Vitamin B6 Metabolism  | PDX5POi  |
| VBICanLib238577_0932 | Transport              | HISabcpp |
| VBICanLib238577_1180 | Lysine Metabolism      | LYSabcpp |
| VBICanLib238577_1189 | Glutathione Metabolism | GTHPi    |

---

**C Las Ishi-1**

---

|          |                                    |            |
|----------|------------------------------------|------------|
| Ishi_157 | Purine and Pyrimidine Biosynthesis | DHORD2     |
| Ishi_159 | Gluconeogenesis                    | PGM        |
| Ishi_176 | Urea cycle/amino group metabolism  | AGPR       |
| Ishi_212 | Urea cycle/amino group metabolism  | ORNTAC     |
| Ishi_308 | Phenylalanine Tyrosine Tryptophan  | 1ANPRT     |
| Ishi_331 | Pyrimidine Metabolism              | DHORDi     |
| Ishi_339 | Gluconeogenesis                    | PYK        |
| Ishi_349 | TCA Cycle                          | ACONT      |
| Ishi_353 | Nicotinate and Nicotinamide        | NAMNPP     |
| Ishi_371 | Gluconeogenesis                    | ENO        |
| Ishi_372 | Gluconeogenesis                    | ENO        |
| Ishi_373 | Oxidative Phosphorylation          | CYO1b      |
| Ishi_374 | Oxidative Phosphorylation          | CYO1b      |
| Ishi_397 | Nucleotide Salvage Pathway         | RNDR1b     |
| Ishi_462 | Nucleotide Salvage Pathway         | RNDR4b     |
| Ishi_525 | Transport                          | CHLabcpp   |
| Ishi_579 | One Carbon pool by folate          | GARFT      |
| Ishi_580 | Gluconeogenesis                    | PGK        |
| Ishi_60  | Transport                          | GLUabcpp   |
| Ishi_667 | Pentose Phosphate Pathway          | TKT2       |
| Ishi_69  | Transport                          | CYSabcpp   |
| Ishi_7   | Fatty Acid Biosynthesis            | 3OAR100    |
| Ishi_72  | Oxidative Phosphorylation          | CYTBO3_4pp |
| Ishi_730 | Fatty Acid Biosynthesis            | EAR141y    |
| Ishi_732 | Glycolysis                         | G6PBDH     |
| Ishi_738 | Fatty Acid Biosynthesis            | ACOATA     |
| Ishi_810 | Transport                          | ILEabcpp   |
| Ishi_839 | Glycolysis                         | G6PDH2r    |

|                     |                                              |             |
|---------------------|----------------------------------------------|-------------|
| Ishi_84             | Valine, Leucine, and Isoleucine Metabolism   | ACHBS       |
| Ishi_863            | Glycine, Serine and threonine metabolism     | GHMT2r      |
| Ishi_898            | Pentose Phosphate Pathway                    | RPE         |
| Ishi_938            | Nicotinate and Nicotinamide                  | NADS1       |
| Ishi_979            | TCA Cycle                                    | MDH         |
| <hr/>               |                                              |             |
| <b>C Las psy62</b>  |                                              |             |
| <hr/>               |                                              |             |
| VBICanLib64949_0016 | Glycolysis                                   | ME1         |
| VBICanLib64949_0058 | Transport                                    | ARGabcpp    |
| VBICanLib64949_0084 | Oxidative Phosphorylation                    | CYTBO3_4pp  |
| VBICanLib64949_0168 | Purine and Pyrimidine Biosynthesis           | DHORD2      |
| VBICanLib64949_0170 | Gluconeogenesis                              | PGM         |
| VBICanLib64949_0187 | Urea cycle/amino group metabolism            | AGPR        |
| VBICanLib64949_0221 | Urea cycle/amino group metabolism            | ACGS        |
| VBICanLib64949_0312 | Nucleotide Salvage Pathway                   | RNDR1b      |
| VBICanLib64949_0317 | Phenylalanine Tyrosine Tryptophan Metabolism | IANPRT      |
| VBICanLib64949_0346 | Gluconeogenesis                              | PYK         |
| VBICanLib64949_0361 | Nicotinate and Nicotinamide                  | NAMNPP      |
| VBICanLib64949_0458 | Nucleotide Salvage Pathway                   | URIDK2r     |
| VBICanLib64949_0471 | Nucleotide Salvage Pathway                   | RNDR4b      |
| VBICanLib64949_0547 | Glutamate Metabolism                         | GTHS        |
| VBICanLib64949_0589 | Gluconeogenesis                              | ENO         |
| VBICanLib64949_0590 | Gluconeogenesis                              | PGK         |
| VBICanLib64949_0684 | Pentose Phosphate Pathway                    | TKT1        |
| VBICanLib64949_0685 | Transport                                    | FE2abc      |
| VBICanLib64949_0686 | Transport                                    | CHLabcpp    |
| VBICanLib64949_0737 | Fatty Acid Biosynthesis                      | EAR141y     |
| VBICanLib64949_0738 | Glycolysis                                   | PGL         |
| VBICanLib64949_0739 | Glycolysis                                   | G6PBDH      |
| VBICanLib64949_0745 | Fatty Acid Biosynthesis                      | ACOATA      |
| VBICanLib64949_0774 | Methane Metabolism                           | FDH         |
| VBICanLib64949_0775 | Methane Metabolism                           | FDH         |
| VBICanLib64949_0776 | Transport                                    | ETHSO3abcpp |
| VBICanLib64949_0803 | Urea cycle/amino group metabolism            | UREA        |
| VBICanLib64949_0842 | Glycolysis                                   | G6PDH2r     |

|                     |                                      |          |
|---------------------|--------------------------------------|----------|
| VBICanLib64949_0864 | Glycine, Serine and threonine metabo | GHMT2r   |
| VBICanLib64949_0886 | Glycine, Serine and threonine metabo | PSP_L    |
| VBICanLib64949_0896 | Transport                            | ICITtex  |
| VBICanLib64949_0897 | Unassigned                           | GRXR     |
| VBICanLib64949_0929 | Nicotinate and Nicotinamide          | NADS1    |
| VBICanLib64949_0983 | TCA Cycle                            | MDH      |
| VBICanLib64949_1093 | Transport                            | LEUabcpp |
| VBICanLib64949_1154 | Glutathione Metabolism               | GTHPi    |

---

**C Las YCPsy**

---

|             |                                    |             |
|-------------|------------------------------------|-------------|
| AL011_00015 | Transport                          | ARGabcpp    |
| AL011_00190 | Transport                          | GLCabcpp    |
| AL011_00710 | Purine and Pyrimidine Biosynthesis | DHORD2      |
| AL011_00720 | Gluconeogenesis                    | PGM         |
| AL011_00800 | Urea cycle/amino group metabolism  | AGPR        |
| AL011_00965 | Urea cycle/amino group metabolism  | ACGS        |
| AL011_01265 | Transport                          | ACT2rpp     |
| AL011_01395 | Phenylalanine Tyrosine Tryptophan  | ANPRT       |
| AL011_01535 | Gluconeogenesis                    | PYK         |
| AL011_01595 | Nicotinate and Nicotinamide        | NAMNPP      |
| AL011_01755 | Urea cycle/amino group metabolism  | ACGK        |
| AL011_01775 | Glutamate Metabolism               | ABTA        |
| AL011_02155 | Transport                          | HISabcpp    |
| AL011_02400 | Pentose Phosphate Pathway          | GND         |
| AL011_02685 | One Carbon pool by folate          | FTHFD       |
| AL011_02690 | Vitamin B6 Metabolism              | E4PD        |
| AL011_02695 | Gluconeogenesis                    | PGK         |
| AL011_03430 | Fatty Acid Biosynthesis            | EAR141y     |
| AL011_03435 | Glycolysis                         | PGL         |
| AL011_03440 | Glycolysis                         | G6PBDH      |
| AL011_03470 | Fatty Acid Biosynthesis            | 3OAS181     |
| AL011_03655 | Methane Metabolism                 | FDH         |
| AL011_03660 | Methane Metabolism                 | FDH         |
| AL011_03665 | Transport                          | ETHSO3abcpp |
| AL011_03815 | Urea cycle/amino group metabolism  | UREA        |

|             |                                      |          |
|-------------|--------------------------------------|----------|
| AL011_03995 | Glycolysis                           | G6PDH2r  |
| AL011_04105 | Glycine, Serine and threonine metabo | GHMT2r   |
| AL011_04215 | Transport                            | ICITtex  |
| AL011_04220 | Vitamin B6 Metabolism                | PDX5POi  |
| AL011_04380 | Nicotinate and Nicotinamide          | NADS1    |
| AL011_04580 | Arginine and Proline Metabolism      | ORNCD    |
| AL011_04615 | TCA Cycle                            | MDH      |
| AL011_05135 | Transport                            | LEUabcpp |
| AL011_05400 | Glutathione Metabolism               | GTHPi    |

---



**Supplementary Table 7.** Gene essentiality by strain and subsystem

| Subsystem                                | Essential genes/no-growth |       |       |        |       |       | No-essential genes/ wild type growth |       |       |        |       |       |
|------------------------------------------|---------------------------|-------|-------|--------|-------|-------|--------------------------------------|-------|-------|--------|-------|-------|
|                                          | A4                        | FL-17 | gxpsy | Ishi-1 | psy62 | YCPsy | A4                                   | FL-17 | gxpsy | Ishi-1 | psy62 | YCPsy |
| Vitamin b6 metabolism                    | 0                         | 0     | 2     | 0      | 0     | 2     | 0                                    | 0     | 0     | 0      | 0     | 0     |
| Valine, leucine, and isoleucine metaboli | 0                         | 0     | 1     | 1      | 0     | 0     | 0                                    | 0     | 0     | 0      | 0     | 0     |
| Urea cycle/amino group metabolism        | 4                         | 0     | 3     | 2      | 3     | 4     | 0                                    | 0     | 0     | 0      | 0     | 0     |
| Unassigned                               | 1                         | 0     | 0     | 0      | 1     | 0     | 0                                    | 0     | 0     | 0      | 0     | 0     |
| Transport                                | 8                         | 0     | 3     | 4      | 6     | 7     | 0                                    | 1     | 0     | 2      | 0     | 2     |
| Tca cycle                                | 1                         | 0     | 0     | 2      | 1     | 1     | 2                                    | 6     | 4     | 3      | 2     | 6     |
| Pyrimidine metabolism                    | 0                         | 0     | 0     | 1      | 0     | 0     | 0                                    | 0     | 0     | 0      | 0     | 0     |
| Purine and pyrimidine biosynthesis       | 1                         | 0     | 1     | 1      | 1     | 1     | 0                                    | 0     | 0     | 0      | 0     | 0     |
| Purine metabolism                        | 0                         | 0     | 0     | 0      | 0     | 0     | 0                                    | 1     | 0     | 0      | 0     | 1     |
| Phenylalanine tyrosine tryptophan biosy  | 1                         | 0     | 0     | 1      | 1     | 1     | 0                                    | 0     | 0     | 0      | 0     | 0     |
| Peptidoglycan biosynthesis               | 0                         | 0     | 1     | 0      | 0     | 0     | 0                                    | 0     | 0     | 0      | 0     | 0     |
| Pentose phosphate pathway                | 1                         | 0     | 2     | 2      | 1     | 1     | 1                                    | 0     | 0     | 0      | 1     | 0     |
| Oxidative phosphorylation                | 1                         | 0     | 1     | 3      | 1     | 0     | 0                                    | 6     | 0     | 0      | 0     | 0     |
| One carbon pool by folate                | 0                         | 0     | 1     | 1      | 0     | 1     | 0                                    | 0     | 0     | 0      | 0     | 0     |
| Nucleotide salvage pathway               | 3                         | 0     | 1     | 2      | 3     | 0     | 0                                    | 0     | 0     | 0      | 0     | 0     |
| Nicotinate and nicotinamide              | 2                         | 0     | 1     | 2      | 2     | 2     | 0                                    | 0     | 0     | 0      | 0     | 0     |
| Methionine metabolism                    | 0                         | 0     | 0     | 0      | 0     | 0     | 1                                    | 0     | 0     | 0      | 0     | 0     |
| Methane metabolism                       | 2                         | 0     | 2     | 0      | 2     | 2     | 0                                    | 0     | 0     | 0      | 0     | 0     |
| Lysine metabolism                        | 0                         | 0     | 1     | 0      | 0     | 0     | 0                                    | 0     | 0     | 0      | 0     | 0     |
| Glycolysis                               | 4                         | 0     | 1     | 2      | 4     | 3     | 0                                    | 0     | 0     | 0      | 0     | 0     |
| Glycine, serine and threonine metabolis  | 2                         | 0     | 0     | 1      | 2     | 1     | 2                                    | 1     | 0     | 1      | 2     | 1     |
| Glutathione metabolism                   | 0                         | 0     | 1     | 0      | 1     | 1     | 0                                    | 0     | 0     | 0      | 0     | 0     |
| Glutamate metabolism                     | 1                         | 0     | 2     | 0      | 1     | 1     | 0                                    | 0     | 0     | 0      | 0     | 0     |
| Gluconeogenesis                          | 4                         | 0     | 3     | 5      | 4     | 3     | 0                                    | 0     | 0     | 0      | 0     | 0     |
| Fatty acid biosynthesis                  | 2                         | 0     | 1     | 3      | 2     | 2     | 0                                    | 0     | 0     | 0      | 0     | 0     |
| Arginine and proline metabolism          | 1                         | 0     | 0     | 0      | 0     | 1     | 0                                    | 0     | 0     | 0      | 0     | 0     |
| Alanine and aspartate metabolism         | 0                         | 0     | 0     | 0      | 0     | 0     | 0                                    | 0     | 1     | 1      | 0     | 0     |

**Supplementary Table 8. Gene essentiality benchmarking**

| <b>Gene</b> | <b>Experimental (Lai et al., 2016)</b> | <b>Probability of having 1 insertion (TnS)</b> | <b>Predicted growth</b> | <b>Phenotype</b> |
|-------------|----------------------------------------|------------------------------------------------|-------------------------|------------------|
| B488_00070  | No essential                           | 0                                              | 0.909658                | TP               |
| B488_00180  | No essential                           | 0                                              | 1                       | TP               |
| B488_00190  | No essential                           | 0                                              | 1                       | TP               |
| B488_00210  | No essential                           | 0                                              | 1                       | TP               |
| B488_00260  | No essential                           | 0                                              | 1                       | TP               |
| B488_00370  | No essential                           | 0                                              | 1                       | TP               |
| B488_00380  | No essential                           | 0                                              | 0                       | FN               |
| B488_00420  | No essential                           | 0                                              | 0                       | FN               |
| B488_00440  | Essential                              | 0.942804928                                    | 0                       | TN               |
| B488_00450  | Essential                              | 0.950782957                                    | 0                       | TN               |
| B488_00490  | Essential                              | 0.841889893                                    | 0                       | TN               |
| B488_00500  | Essential                              | 0.958615955                                    | 0                       | TN               |
| B488_00540  | No essential                           | 0                                              | 0                       | FN               |
| B488_00550  | Essential                              | 0.945388514                                    | 0                       | TN               |
| B488_00560  | No essential                           | 0                                              | 0                       | FN               |
| B488_00600  | No essential                           | 0                                              | 0                       | FN               |
| B488_00630  | No essential                           | 0                                              | 0                       | FN               |
| B488_00690  | No essential                           | 0                                              | 0                       | FN               |
| B488_00710  | No essential                           | 0                                              | 0                       | FN               |
| B488_00740  | No essential                           | 0                                              | 0                       | FN               |
| B488_00810  | No essential                           | 0                                              | 1                       | TP               |
| B488_00820  | No essential                           | 0                                              | 0                       | FN               |
| B488_00830  | No essential                           | 0                                              | 0                       | FN               |
| B488_00840  | Essential                              | 0.765815875                                    | 0                       | TN               |
| B488_00850  | No essential                           | 0                                              | 0                       | FN               |
| B488_00950  | No essential                           | 0                                              | 0                       | FN               |
| B488_00970  | No essential                           | 0                                              | 0                       | FN               |
| B488_00980  | No essential                           | 0                                              | 0                       | FN               |
| B488_00990  | No essential                           | 0                                              | 0                       | FN               |
| B488_01030  | No essential                           | 0                                              | 0                       | FN               |
| B488_01060  | Essential                              | 0.949046764                                    | 0                       | TN               |
| B488_01070  | No essential                           | 0                                              | 0                       | FN               |
| B488_01080  | Essential                              | 0.860760087                                    | 0                       | TN               |
| B488_01100  | No essential                           | 0                                              | 0                       | FN               |
| B488_01110  | No essential                           | 0                                              | 0                       | FN               |
| B488_01130  | Essential                              | 0.993180375                                    | 0                       | TN               |
| B488_01160  | No essential                           | 0                                              | 1                       | TP               |
| B488_01170  | No essential                           | 0                                              | 0                       | FN               |
| B488_01190  | No essential                           | 0                                              | 0                       | FN               |
| B488_01200  | No essential                           | 0                                              | 0                       | FN               |
| B488_01240  | No essential                           | 0                                              | 0                       | FN               |
| B488_01270  | No essential                           | 0                                              | 0                       | FN               |
| B488_01280  | No essential                           | 0                                              | 0                       | FN               |

|            |              |             |          |    |
|------------|--------------|-------------|----------|----|
| B488_01290 | No essential | 0           | 0        | FN |
| B488_01310 | No essential | 0           | 0        | FN |
| B488_01360 | No essential | 0           | 0.997544 | TP |
| B488_01370 | Essential    | 0.944753768 | 0        | TN |
| B488_01400 | No essential | 0           | 0        | FN |
| B488_01440 | No essential | 0           | 0        | FN |
| B488_01450 | No essential | 0           | 0        | FN |
| B488_01480 | Essential    | 0.984859176 | 0        | TN |
| B488_01490 | No essential | 0           | 0        | FN |
| B488_01500 | No essential | 0           | 0        | FN |
| B488_01620 | No essential | 0.991406541 | 0        | TN |
| B488_01670 | No essential | 0           | 0        | FN |
| B488_01700 | No essential | 0           | 0        | FN |
| B488_01740 | No essential | 0           | 0        | FN |
| B488_01750 | No essential | 0           | 0        | FN |
| B488_01920 | No essential | 0           | 0        | FN |
| B488_02090 | No essential | 0           | 0        | FN |
| B488_02110 | Essential    | 0.995502027 | 0        | TN |
| B488_02160 | No essential | 0           | 0        | FN |
| B488_02180 | No essential | 0           | 0        | FN |
| B488_02230 | No essential | 0           | 0        | FN |
| B488_02240 | No essential | 0           | 0        | FN |
| B488_02250 | No essential | 0           | 0        | FN |
| B488_02350 | Essential    | 0.980699757 | 0        | TN |
| B488_02390 | Essential    | 0.98047539  | 0        | TN |
| B488_02410 | No essential | 0           | 0        | FN |
| B488_02420 | Essential    | 0.97858399  | 0        | TN |
| B488_02430 | No essential | 0           | 0        | FN |
| B488_02460 | Essential    | 0.822525214 | 0        | TN |
| B488_02470 | No essential | 0           | 0        | FN |
| B488_02490 | No essential | 0           | 0        | FN |
| B488_02530 | No essential | 0           | 0        | FN |
| B488_02570 | No essential | 0           | 0        | FN |
| B488_02580 | No essential | 0           | 0        | FN |
| B488_02590 | No essential | 0           | 0        | FN |
| B488_02600 | No essential | 0           | 1        | TP |
| B488_02610 | No essential | 0           | 1        | TP |
| B488_02620 | Essential    | 0.992344656 | 0        | TN |
| B488_02630 | No essential | 0           | 0        | FN |
| B488_02640 | No essential | 0           | 0        | FN |
| B488_02650 | No essential | 0           | 0        | FN |
| B488_02660 | Essential    | 0.903797358 | 0        | TN |
| B488_02670 | No essential | 0           | 0        | FN |
| B488_02680 | No essential | 0           | 0        | FN |
| B488_02690 | No essential | 0           | 0        | FN |
| B488_02700 | No essential | 0           | 0        | FN |
| B488_02730 | No essential | 0.994331978 | 0        | TN |

|            |              |             |          |    |
|------------|--------------|-------------|----------|----|
| B488_02750 | Essential    | 0.927934188 | 0        | TN |
| B488_02760 | Essential    | 0.945388514 | 0        | TN |
| B488_02770 | No essential | 0           | 0        | FN |
| B488_02780 | No essential | 0           | 0        | FN |
| B488_02850 | Essential    | 0.902679311 | 0        | TN |
| B488_02930 | No essential | 0           | 0        | FN |
| B488_02950 | Essential    | 0.960485436 | 2.08E-11 | FP |
| B488_02960 | No essential | 0           | 0.134067 | TP |
| B488_02970 | Essential    | 0.994950775 | 0.440686 | FP |
| B488_03020 | Essential    | 0.636744737 | 0.463523 | FP |
| B488_03030 | No essential | 0           | 0.712066 | TP |
| B488_03110 | No essential | 0           | 0.712066 | TP |
| B488_03130 | No essential | 0           | 0.712066 | TP |
| B488_03160 | No essential | 0           | 0.712066 | TP |
| B488_03240 | No essential | 0           | 0.712066 | TP |
| B488_03250 | No essential | 0           | 0.712066 | TP |
| B488_03260 | No essential | 0           | 0.719179 | TP |
| B488_03270 | No essential | 0           | 0.7371   | TP |
| B488_03310 | No essential | 0           | 0.77091  | TP |
| B488_03320 | Essential    | 0.811971015 | 0.787909 | FP |
| B488_03410 | No essential | 0           | 0.853169 | TP |
| B488_03540 | No essential | 0           | 0.908908 | TP |
| B488_03570 | No essential | 0           | 0.909658 | TP |
| B488_03580 | No essential | 0           | 0.946485 | TP |
| B488_03630 | Essential    | 0.983771887 | 0.946762 | FP |
| B488_03640 | No essential | 0           | 0.955232 | TP |
| B488_03690 | No essential | 0           | 0.958038 | TP |
| B488_03820 | No essential | 0           | 0.958038 | TP |
| B488_03850 | No essential | 0           | 0.958759 | TP |
| B488_03910 | No essential | 0           | 0.963355 | TP |
| B488_03920 | No essential | 0           | 0.964767 | TP |
| B488_03930 | No essential | 0           | 0.971943 | TP |
| B488_03980 | No essential | 0           | 0.971943 | TP |
| B488_04000 | Essential    | 0.768505843 | 0.971943 | FP |
| B488_04010 | No essential | 0           | 0.971943 | TP |
| B488_04310 | Essential    | 0.89569286  | 0.985692 | FP |
| B488_04410 | No essential | 0           | 0.985692 | TP |
| B488_04420 | No essential | 0           | 0.985692 | TP |
| B488_04500 | No essential | 0           | 0.985692 | TP |
| B488_04520 | No essential | 0.999943844 | 0.985808 | FP |
| B488_04530 | No essential | 0           | 0.987744 | TP |
| B488_04610 | No essential | 0           | 0.987968 | TP |
| B488_04630 | Essential    | 0.998216317 | 0.987968 | FP |
| B488_04640 | Essential    | 0.990573947 | 0.987968 | FP |
| B488_04780 | No essential | 0           | 0.989873 | TP |
| B488_04950 | No essential | 0           | 0.991914 | TP |
| B488_05190 | No essential | 0           | 0.991914 | TP |

|            |              |             |          |    |
|------------|--------------|-------------|----------|----|
| B488_05250 | Essential    | 0.959561495 | 0.99697  | FP |
| B488_0528  | No essential | 0           | 0.997269 | TP |
| B488_05280 | No essential | 0           | 0.997621 | TP |
| B488_05290 | No essential | 0           | 0.999142 | TP |
| B488_05310 | No essential | 0           | 0.999703 | TP |
| B488_05350 | No essential | 0           | 0.999977 | TP |
| B488_05360 | No essential | 0           | 1        | TP |
| B488_05380 | No essential | 0           | 1        | TP |
| B488_05410 | No essential | 0           | 1        | TP |
| B488_05430 | No essential | 0           | 1        | TP |
| B488_05450 | Essential    | 0.82857125  | 1        | FP |
| B488_05510 | No essential | 0           | 1        | TP |
| B488_05630 | No essential | 0           | 1        | TP |
| B488_05640 | No essential | 0           | 1        | TP |
| B488_05650 | No essential | 0           | 1        | TP |
| B488_05690 | No essential | 0           | 1        | TP |
| B488_05700 | No essential | 0.991982367 | 1        | FP |
| B488_05820 | No essential | 0           | 1        | TP |
| B488_05870 | No essential | 0           | 1        | TP |
| B488_05890 | No essential | 0           | 1        | TP |
| B488_05900 | No essential | 0           | 1        | TP |
| B488_05910 | No essential | 0           | 1        | TP |
| B488_05940 | No essential | 0           | 1        | TP |
| B488_05980 | No essential | 0           | 1        | TP |
| B488_06010 | No essential | 0           | 1        | TP |
| B488_06020 | No essential | 0           | 1        | TP |
| B488_06060 | No essential | 0           | 1        | TP |
| B488_06080 | No essential | 0           | 1        | TP |
| B488_06090 | No essential | 0           | 1        | TP |
| B488_06120 | Essential    | 0.920954631 | 1        | FP |
| B488_06130 | No essential | 0           | 1        | TP |
| B488_06150 | No essential | 0           | 1        | TP |
| B488_06340 | Essential    | 0.953006219 | 1        | FP |
| B488_06350 | No essential | 0           | 1        | TP |
| B488_06380 | Essential    | 0.967156257 | 1        | FP |
| B488_06400 | No essential | 0           | 1        | TP |
| B488_06410 | No essential | 0           | 1        | TP |
| B488_06460 | No essential | 0           | 1        | TP |
| B488_06500 | Essential    | 0.929580588 | 1        | FP |
| B488_06510 | Essential    | 0.981783506 | 1        | FP |
| B488_06600 | No essential | 0           | 1        | TP |
| B488_06670 | No essential | 0.91127225  | 1        | FP |
| B488_06680 | No essential | 0           | 1        | TP |
| B488_06750 | No essential | 0           | 1        | TP |
| B488_06870 | No essential | 0           | 1        | TP |
| B488_06880 | Essential    | 0.994892064 | 1        | FP |
| B488_06930 | No essential | 0           | 1        | TP |

|            |              |             |   |    |
|------------|--------------|-------------|---|----|
| B488_06970 | Essential    | 0.969000339 | 1 | FP |
| B488_06980 | No essential | 0           | 1 | TP |
| B488_07080 | Essential    | 0.91024106  | 1 | FP |
| B488_07100 | No essential | 0           | 1 | TP |
| B488_07110 | No essential | 0           | 1 | TP |
| B488_07130 | No essential | 0           | 1 | TP |
| B488_07140 | No essential | 0           | 1 | TP |
| B488_07150 | No essential | 0           | 1 | TP |
| B488_07160 | No essential | 0           | 1 | TP |
| B488_07290 | No essential | 0           | 1 | TP |
| B488_07350 | No essential | 0           | 1 | TP |
| B488_07360 | Essential    | 0.994711804 | 1 | FP |
| B488_07370 | No essential | 0           | 1 | TP |
| B488_07380 | No essential | 0           | 1 | TP |
| B488_07390 | Essential    | 0.927096612 | 1 | FP |
| B488_07400 | No essential | 0           | 1 | TP |
| B488_07410 | No essential | 0           | 1 | TP |
| B488_07420 | Essential    | 0.999986932 | 1 | FP |
| B488_07430 | No essential | 0           | 1 | TP |
| B488_07440 | No essential | 0           | 1 | TP |
| B488_07450 | No essential | 0           | 1 | TP |
| B488_07480 | Essential    | 0.950210899 | 1 | FP |
| B488_07490 | No essential | 0           | 1 | TP |
| B488_07500 | Essential    | 0.768505843 | 1 | FP |
| B488_07530 | No essential | 0           | 1 | TP |
| B488_07550 | No essential | 0           | 1 | TP |
| B488_07620 | No essential | 0           | 1 | TP |
| B488_07630 | No essential | 0           | 1 | TP |
| B488_07730 | No essential | 0           | 1 | TP |
| B488_07750 | No essential | 0           | 1 | TP |
| B488_08000 | No essential | 0           | 1 | TP |
| B488_08030 | Essential    | 0.92364784  | 1 | FP |
| B488_08090 | Essential    | 0.82857125  | 1 | FP |
| B488_08110 | Essential    | 0.965202496 | 1 | FP |
| B488_08160 | No essential | 0           | 1 | TP |
| B488_08180 | No essential | 0           | 1 | TP |
| B488_08260 | No essential | 0           | 1 | TP |
| B488_08280 | No essential | 0           | 1 | TP |
| B488_08370 | No essential | 0           | 1 | TP |
| B488_08390 | No essential | 0           | 1 | TP |
| B488_08410 | Essential    | 0.971077104 | 1 | FP |
| B488_08420 | No essential | 0           | 1 | TP |
| B488_08540 | No essential | 0           | 1 | TP |
| B488_08590 | No essential | 0           | 1 | TP |
| B488_08630 | No essential | 0           | 1 | TP |
| B488_08640 | No essential | 0           | 1 | TP |
| B488_08710 | No essential | 0           | 1 | TP |

|            |              |             |   |    |
|------------|--------------|-------------|---|----|
| B488_08720 | Essential    | 0.989896988 | 1 | FP |
| B488_08730 | Essential    | 0.950782957 | 1 | FP |
| B488_08800 | No essential | 0           | 1 | TP |
| B488_08830 | No essential | 0           | 1 | TP |
| B488_08840 | No essential | 0           | 1 | TP |
| B488_08850 | No essential | 0           | 1 | TP |
| B488_08860 | No essential | 0           | 1 | TP |
| B488_09100 | No essential | 0           | 1 | TP |
| B488_09110 | No essential | 0           | 1 | TP |
| B488_09190 | No essential | 0           | 1 | TP |
| B488_09260 | Essential    | 0.936536224 | 1 | FP |
| B488_09550 | Essential    | 0.971299092 | 1 | FP |
| B488_09560 | No essential | 0           | 1 | TP |
| B488_09590 | No essential | 0           | 1 | TP |
| B488_09610 | No essential | 0           | 1 | TP |
| B488_09630 | No essential | 0           | 1 | TP |
| B488_09680 | No essential | 0           | 1 | TP |
| B488_09730 | No essential | 0           | 1 | TP |
| B488_09740 | No essential | 0           | 1 | TP |
| B488_09750 | Essential    | 0.836313506 | 1 | FP |
| B488_09760 | No essential | 0           | 1 | TP |
| B488_09770 | No essential | 0           | 1 | TP |
| B488_09780 | No essential | 0           | 1 | TP |
| B488_09830 | No essential | 0.999340189 | 1 | FP |
| B488_09860 | No essential | 0           | 1 | TP |
| B488_09870 | No essential | 0           | 1 | TP |
| B488_09880 | No essential | 0.995655355 | 1 | FP |
| B488_09910 | No essential | 0           | 1 | TP |
| B488_09920 | No essential | 0           | 1 | TP |
| B488_09930 | No essential | 0           | 1 | TP |
| B488_09950 | No essential | 0           | 1 | TP |
| B488_09960 | No essential | 0           | 1 | TP |
| B488_09970 | No essential | 0           | 1 | TP |
| B488_09990 | No essential | 0           | 1 | TP |
| B488_10000 | No essential | 0           | 1 | TP |
| B488_10030 | No essential | 0           | 1 | TP |
| B488_10070 | No essential | 0           | 1 | TP |
| B488_10080 | No essential | 0           | 1 | TP |
| B488_10100 | No essential | 0           | 1 | TP |
| B488_10110 | Essential    | 0.596944545 | 1 | FP |
| B488_10120 | No essential | 0           | 1 | TP |
| B488_10130 | Essential    | 0.973934362 | 1 | FP |
| B488_10150 | Essential    | 0.954079907 | 1 | FP |
| B488_10160 | No essential | 0           | 1 | TP |
| B488_10200 | Essential    | 0.868576115 | 1 | FP |
| B488_10220 | No essential | 0           | 1 | TP |
| B488_10230 | Essential    | 0.875953473 | 1 | FP |

|            |              |             |   |    |
|------------|--------------|-------------|---|----|
| B488_10260 | No essential | 0           | 1 | TP |
| B488_10270 | No essential | 0           | 1 | TP |
| B488_10280 | No essential | 0           | 1 | TP |
| B488_10290 | No essential | 0           | 1 | TP |
| B488_10380 | Essential    | 0.996963995 | 1 | FP |
| B488_10420 | No essential | 0           | 1 | TP |
| B488_10430 | No essential | 0           | 1 | TP |
| B488_10530 | No essential | 0           | 1 | TP |
| B488_10540 | No essential | 0           | 1 | TP |
| B488_10550 | No essential | 0           | 1 | TP |
| B488_10560 | No essential | 0           | 1 | TP |
| B488_10590 | No essential | 0           | 1 | TP |
| B488_10630 | No essential | 0           | 1 | TP |
| B488_10640 | No essential | 0.984683156 | 1 | FP |
| B488_10730 | Essential    | 0.983958377 | 1 | FP |
| B488_10740 | No essential | 0           | 1 | TP |
| B488_10770 | Essential    | 0.981783506 | 1 | FP |
| B488_10780 | No essential | 0           | 1 | TP |
| B488_10790 | No essential | 0           | 1 | TP |
| B488_10810 | No essential | 0           | 1 | TP |
| B488_10860 | No essential | 0.905995074 | 1 | FP |
| B488_10870 | No essential | 0           | 1 | TP |
| B488_10890 | Essential    | 0.993180375 | 1 | FP |
| B488_10950 | Essential    | 0.993020868 | 1 | FP |
| B488_10980 | Essential    | 0.961388269 | 1 | FP |
| B488_10990 | No essential | 0           | 1 | TP |
| B488_11010 | No essential | 0           | 1 | TP |
| B488_11020 | No essential | 0           | 1 | TP |
| B488_11040 | No essential | 0           | 1 | TP |
| B488_11050 | No essential | 0           | 1 | TP |
| B488_11070 | No essential | 0           | 1 | TP |
| B488_11110 | No essential | 0           | 1 | TP |
| B488_11140 | No essential | 0           | 1 | TP |
| B488_11150 | No essential | 0           | 1 | TP |
| B488_11190 | No essential | 0           | 1 | TP |
| B488_11240 | Essential    | 0.971737973 | 1 | FP |
| B488_11250 | No essential | 0           | 1 | TP |
| B488_11320 | Essential    | 0.986355079 | 1 | FP |
| B488_11330 | No essential | 0           | 1 | TP |
| B488_11350 | Essential    | 0.974529955 | 1 | FP |
| B488_11450 | No essential | 0           | 1 | TP |
| B488_11480 | No essential | 0           | 1 | TP |
| B488_11490 | No essential | 0           | 1 | TP |
| B488_11520 | No essential | 0           | 1 | TP |
| B488_11550 | Essential    | 0.990241335 | 1 | FP |
| B488_11560 | Essential    | 0.972383744 | 1 | FP |
| B488_11610 | No essential | 0           | 1 | TP |



|            |              |             |   |    |
|------------|--------------|-------------|---|----|
| B488_11640 | Essential    | 0.9896607   | 1 | FP |
| B488_11650 | No essential | 0           | 1 | TP |
| B488_11750 | No essential | 0           | 1 | TP |
| B488_11760 | No essential | 0           | 1 | TP |
| B488_11770 | No essential | 0           | 1 | TP |
| B488_11780 | No essential | 0           | 1 | TP |
| B488_11790 | No essential | 0           | 1 | TP |
| B488_11800 | Essential    | 0.884261819 | 1 | FP |
| B488_11870 | No essential | 0           | 1 | TP |
| B488_11890 | Essential    | 0.949632194 | 1 | FP |
| B488_12030 | No essential | 0           | 1 | TP |
| B488_12080 | No essential | 0           | 1 | TP |
| B488_12090 | No essential | 0           | 1 | TP |
| B488_12100 | No essential | 0           | 1 | TP |
| B488_12160 | No essential | 0           | 1 | TP |
| B488_12170 | No essential | 0           | 1 | TP |
| B488_12180 | No essential | 0           | 1 | TP |
| B488_12310 | No essential | 0           | 1 | TP |
| B488_12320 | No essential | 0           | 1 | TP |
| B488_12360 | No essential | 0           | 1 | TP |
| B488_12440 | No essential | 0           | 1 | TP |
| B488_12550 | No essential | 0           | 1 | TP |
| B488_12610 | Essential    | 0.955129068 | 1 | FP |
| B488_12620 | No essential | 0           | 1 | TP |
| B488_12630 | No essential | 0           | 1 | TP |
| B488_12660 | No essential | 0           | 1 | TP |
| B488_12670 | No essential | 0           | 1 | TP |
| B488_12780 | No essential | 0           | 1 | TP |
| B488_12880 | No essential | 0.610673531 | 1 | FP |
| B488_12960 | Essential    | 0.9857094   | 1 | FP |
| B488_13000 | Essential    | 0.92364784  | 1 | FP |
| B488_13010 | No essential | 0           | 1 | TP |
| B488_13020 | No essential | 0           | 1 | TP |
| B488_13070 | No essential | 0           | 1 | TP |
| B488_13080 | No essential | 0           | 1 | TP |
| B488_13090 | No essential | 0           | 1 | TP |
| B488_13100 | No essential | 0           | 1 | TP |
| B488_13110 | No essential | 0           | 1 | TP |
| B488_13120 | No essential | 0           | 1 | TP |
| B488_13180 | Essential    | 0.983958377 | 1 | FP |
| B488_13230 | Essential    | 0.967156257 | 1 | FP |
| B488_13240 | No essential | 0           | 1 | TP |
| B488_13270 | No essential | 0           | 1 | TP |
| B488_13310 | No essential | 0           | 1 | TP |
| B488_13360 | No essential | 0           | 1 | TP |
| B488_13370 | No essential | 0           | 1 | TP |
| B488_13380 | No essential | 0           | 1 | TP |

|            |              |             |   |    |
|------------|--------------|-------------|---|----|
| B488_13390 | No essential | 0           | 1 | TP |
| B488_13490 | No essential | 0           | 1 | TP |
| B488_13510 | No essential | 0           | 1 | TP |
| B488_13520 | No essential | 0           | 1 | TP |
| B488_13530 | Essential    | 0.724703779 | 1 | FP |
| B488_13540 | Essential    | 0.975680632 | 1 | FP |
| B488_13600 | Essential    | 0.653148398 | 1 | FP |
| B488_13650 | No essential | 0           | 1 | TP |
| B488_13660 | No essential | 0           | 1 | TP |
| B488_13670 | No essential | 0           | 1 | TP |
| B488_13730 | No essential | 0           | 1 | TP |
| B488_13740 | No essential | 0           | 1 | TP |
| B488_13760 | No essential | 0           | 1 | TP |

**Supplementary Table 9. Predicted strain-specific *C* Las genes potentially lethal useful for biocontrol**

| Culture Media |                                      |          | RNA-sequencing Citrus |                                      |          |
|---------------|--------------------------------------|----------|-----------------------|--------------------------------------|----------|
| Gene          | Subsystem                            | Reaction | Gene                  | Subsystem                            | Reaction |
| <b>A4</b>     |                                      |          | <b>A4</b>             |                                      |          |
| CD16_RS00145  | Purine Metabolism                    | AIRCr    | CD16_RSC              | Purine Metabolism                    | AIRCr    |
| CD16_RS00505  | Oxidative Phosphorylation            | PPA      | CD16_RSC              | Oxidative Phosphorylation            | PPA      |
| CD16_RS00680  | Fatty Acid Biosynthesis              | ACCOAC   | CD16_RSC              | Fatty Acid Biosynthesis              | ACCOAC   |
| CD16_RS00750  | Glycolysis                           | HEX1     | CD16_RSC              | Purine and Pyrimidine Biosynthesis   | DHORD2   |
| CD16_RS00855  | Pantothenate and CoA Biosynthesis    | DHPM1    | CD16_RSC              | Gluconeogenesis                      | PGM      |
| CD16_RS01035  | Alanine and Aspartate Metabolism     | ASNS1    | CD16_RSC              | Glycolysis                           | HEX1     |
| CD16_RS01090  | Riboflavin Metabolism                | RBFSb    | CD16_RSC              | Pantothenate and CoA Biosynthesis    | DHPM1    |
| CD16_RS01515  | Pyrimidine Metabolism                | DHORDi   | CD16_RSC              | Alanine and Aspartate Metabolism     | ASNS1    |
| CD16_RS01890  | Folate Biosynthesis                  | DHFS     | CD16_RSC              | Riboflavin Metabolism                | RBFSb    |
| CD16_RS02925  | Purine Metabolism                    | ADSS     | CD16_RSC              | Pyrimidine Metabolism                | DHORDi   |
| CD16_RS02930  | Porphyrin and Chlorophyll Metabolism | SHCHF    | CD16_RSC              | Folate Biosynthesis                  | DHFS     |
| CD16_RS03955  | Lysine Biosynthesis                  | DHDPRy   | CD16_RSC              | Nucleotide Salvage Pathway           | RNDR4b   |
| CD16_RS04265  | Purine Metabolism                    | PRASCSi  | CD16_RSC              | Purine Metabolism                    | ADSS     |
| CD16_RS04880  | Peptidoglycan Biosynthesis           | UAGPT3   | CD16_RSC              | Porphyrin and Chlorophyll Metabolism | SHCHF    |
| <b>FL-17</b>  |                                      |          | CD16_RSC              | Pentose Phosphate Pathway            | TKT1     |
| RH08_RS00180  | Purine Metabolism                    | AIRCr    | CD16_RSC              | Lysine Biosynthesis                  | DHDPRy   |
| RH08_RS00535  | Oxidative Phosphorylation            | PPA      | CD16_RSC              | Unassigned                           | GRXR     |
| RH08_RS00710  | Fatty Acid Biosynthesis              | ACCOAC   | CD16_RSC              | Purine Metabolism                    | PRASCSi  |
| RH08_RS00780  | Glycolysis                           | HEX1     | CD16_RSC              | Arginine and Proline Metabolism      | ORNCD    |
| RH08_RS00885  | Pantothenate and CoA Biosynthesis    | DHPM1    | CD16_RSC              | Peptidoglycan Biosynthesis           | UAGPT3   |
| RH08_RS01065  | Alanine and Aspartate Metabolism     | ASNS1    | CD16_RSC              | Transport                            | LEUabcpp |
| RH08_RS01120  | Riboflavin Metabolism                | RBFSb    | <b>FL-17</b>          |                                      |          |
| RH08_RS01545  | Pyrimidine Metabolism                | DHORDi   | <b>gxpsy</b>          |                                      |          |
| RH08_RS01885  | Pantothenate and CoA Biosynthesis    | PNTK     | WSI_RS00              | Purine Metabolism                    | AIRCr    |
| RH08_RS01920  | Folate Biosynthesis                  | DHFS     | WSI_RS00              | Oxidative Phosphorylation            | PPA      |
| RH08_RS02965  | Purine Metabolism                    | ADSS     | WSI_RS00              | Fatty Acid Biosynthesis              | ACCOAC   |
| RH08_RS02970  | Porphyrin and Chlorophyll Metabolism | SHCHF    | WSI_RS00              | Purine and Pyrimidine Biosynthesis   | DHORD2   |
| RH08_RS04005  | Lysine Biosynthesis                  | DHDPRy   | WSI_RS00              | Gluconeogenesis                      | PGM      |
| RH08_RS04315  | Purine Metabolism                    | PRAIS    | WSI_RS00              | Glycolysis                           | HEX1     |
| RH08_RS04905  | Peptidoglycan Biosynthesis           | UAGPT3   | WSI_RS00              | Pantothenate and CoA Biosynthesis    | DHPM1    |

|                  |                                      |         |                                               |         |
|------------------|--------------------------------------|---------|-----------------------------------------------|---------|
| <b>gxpsy</b>     |                                      |         | WSI_RS01 Alanine and Aspartate Metabolism     | ASNS1   |
| WSI_RS00110      | Purine Metabolism                    | AIRCcr  | WSI_RS01 Riboflavin Metabolism                | RBFSb   |
| WSI_RS00480      | Oxidative Phosphorylation            | PPA     | WSI_RS01 Pyrimidine Metabolism                | DHORDi  |
| WSI_RS00655      | Fatty Acid Biosynthesis              | ACCOAC  | WSI_RS01 Pantothenate and CoA Biosynthesis    | PNTK    |
| WSI_RS00725      | Glycolysis                           | HEX1    | WSI_RS01 Folate Biosynthesis                  | DHFS    |
| WSI_RS00830      | Pantothenate and CoA Biosynthesis    | DHPM1   | WSI_RS02 Pentose Phosphate Pathway            | TKT2    |
| WSI_RS01010      | Alanine and Aspartate Metabolism     | ASNS1   | WSI_RS02 Nucleotide Salvage Pathway           | RNDR4b  |
| WSI_RS01070      | Riboflavin Metabolism                | RBFSb   | WSI_RS02 Purine Metabolism                    | ADSS    |
| WSI_RS01490      | Pyrimidine Metabolism                | DHORDi  | WSI_RS02 Porphyrin and Chlorophyll Metabolism | SHCHF   |
| WSI_RS01830      | Pantothenate and CoA Biosynthesis    | PNTK    | WSI_RS03 Pyrimidine Metabolism                | TMDS    |
| WSI_RS01865      | Folate Biosynthesis                  | DHFS    | WSI_RS03 TCA Cycle                            | ICDHyr  |
| WSI_RS02900      | Purine Metabolism                    | ADSS    | WSI_RS03 Lysine Biosynthesis                  | DHDPRy  |
| WSI_RS02905      | Porphyrin and Chlorophyll Metabolism | SHCHF   | WSI_RS04 Vitamin B6 Metabolism                | PDX5POi |
| WSI_RS03160      | Pyrimidine Metabolism                | TMDS    | WSI_RS04 Purine Metabolism                    | PRAIS   |
| WSI_RS03930      | Lysine Biosynthesis                  | DHDPRy  | <b>Ishi-1</b>                                 |         |
| WSI_RS04240      | Purine Metabolism                    | PRAIS   | CGUJ_RS(Purine Metabolism)                    | AIRCcr  |
| <b>Ishi-1</b>    |                                      |         | CGUJ_RS(Oxidative Phosphorylation)            | PPA     |
| CGUJ_RS00135     | Purine Metabolism                    | AIRCcr  | CGUJ_RS(Fatty Acid Biosynthesis)              | ACCOAC  |
| CGUJ_RS00490     | Oxidative Phosphorylation            | PPA     | CGUJ_RS( Gluconeogenesis)                     | PGM     |
| CGUJ_RS00665     | Fatty Acid Biosynthesis              | ACCOAC  | CGUJ_RS(Glycolysis)                           | HEX1    |
| CGUJ_RS00735     | Glycolysis                           | HEX1    | CGUJ_RS(Purine metabolism)                    | GLUPRT  |
| CGUJ_RS01015     | Purine metabolism                    | GLUPRT  | CGUJ_RS(Riboflavin Metabolism)                | RBFSa   |
| CGUJ_RS01070     | Riboflavin Metabolism                | RBFSa   | CGUJ_RS(Pyrimidine Metabolism)                | DHORDi  |
| CGUJ_RS01870     | Folate Biosynthesis                  | DHFS    | CGUJ_RS( Gluconeogenesis)                     | ENO     |
| CGUJ_RS02655     | Nitrogen Metabolism                  | H2CO3D  | CGUJ_RS(Folate Biosynthesis)                  | DHFS    |
| CGUJ_RS02910     | Purine Metabolism                    | ADSS    | CGUJ_RS(Nucleotide Salvage Pathway)           | RNDR4b  |
| CGUJ_RS02915     | Porphyrin and Chlorophyll Metabolism | SHCHD2  | CGUJ_RS(Nitrogen Metabolism)                  | H2CO3D  |
| CGUJ_RS03950     | Lysine Biosynthesis                  | DHDPRy  | CGUJ_RS(Purine Metabolism)                    | ADSS    |
| CGUJ_RS04230     | Fatty Acid Biosynthesis              | EAR180y | CGUJ_RS(Porphyrin and Chlorophyll Metabolism) | SHCHD2  |
| CGUJ_RS04255     | Purine Metabolism                    | PRASCSi | CGUJ_RS(Lysine Biosynthesis)                  | DHDPRy  |
| <b>psy62</b>     |                                      |         | CGUJ_RS(Fatty Acid Biosynthesis)              | EAR180y |
| CLIBASIA_RS00180 | Purine Metabolism                    | AIRCcr  | CGUJ_RS(Purine Metabolism)                    | PRASCSi |
| CLIBASIA_RS00540 | Oxidative Phosphorylation            | PPA     | <b>psy62</b>                                  |         |
| CLIBASIA_RS00715 | Fatty Acid Biosynthesis              | ACCOAC  | CLIBASIA Purine Metabolism                    | AIRCcr  |

|                  |                                      |         |                                               |          |
|------------------|--------------------------------------|---------|-----------------------------------------------|----------|
| CLIBASIA_RS00785 | Glycolysis                           | HEX1    | CLIBASIA Oxidative Phosphorylation            | PPA      |
| CLIBASIA_RS00890 | Pantothenate and CoA Biosynthesis    | DHPM1   | CLIBASIA Fatty Acid Biosynthesis              | ACCOAC   |
| CLIBASIA_RS01070 | Alanine and Aspartate Metabolism     | ASNS1   | CLIBASIA Purine and Pyrimidine Biosynthesis   | DHORD2   |
| CLIBASIA_RS01125 | Riboflavin Metabolism                | RBFSb   | CLIBASIA Gluconeogenesis                      | PGM      |
| CLIBASIA_RS01550 | Pyrimidine Metabolism                | DHORDi  | CLIBASIA Glycolysis                           | HEX1     |
| CLIBASIA_RS01925 | Folate Biosynthesis                  | DHFS    | CLIBASIA Pantothenate and CoA Biosynthesis    | DHPM1    |
| CLIBASIA_RS02965 | Purine Metabolism                    | ADSS    | CLIBASIA Alanine and Aspartate Metabolism     | ASNS1    |
| CLIBASIA_RS02970 | Porphyryn and Chlorophyll Metabolism | SHCHF   | CLIBASIA Riboflavin Metabolism                | RBFSb    |
| CLIBASIA_RS04005 | Lysine Biosynthesis                  | DHDPRy  | CLIBASIA Pyrimidine Metabolism                | DHORDi   |
| CLIBASIA_RS04310 | Purine Metabolism                    | PRASCSi | CLIBASIA Folate Biosynthesis                  | DHFS     |
| CLIBASIA_RS04895 | Peptidoglycan Biosynthesis           | UAGPT3  | CLIBASIA Nucleotide Salvage Pathway           | RNDR4b   |
| <b>YCPsy</b>     |                                      |         | CLIBASIA Purine Metabolism                    | ADSS     |
| AL011_RS00120    | Purine Metabolism                    | AIRCr   | CLIBASIA Porphyryn and Chlorophyll Metabolism | SHCHF    |
| AL011_RS00480    | Oxidative Phosphorylation            | PPA     | CLIBASIA Pentose Phosphate Pathway            | TKT1     |
| AL011_RS00655    | Fatty Acid Biosynthesis              | ACCOAC  | CLIBASIA Lysine Biosynthesis                  | DHDPRy   |
| AL011_RS00725    | Glycolysis                           | HEX1    | CLIBASIA Unassigned                           | GRXR     |
| AL011_RS00830    | Pantothenate and CoA Biosynthesis    | DHPM1   | CLIBASIA Purine Metabolism                    | PRASCSi  |
| AL011_RS01010    | Alanine and Aspartate Metabolism     | ASNS1   | CLIBASIA Peptidoglycan Biosynthesis           | UAGPT3   |
| AL011_RS01065    | Riboflavin Metabolism                | RBFSb   | CLIBASIA Transport                            | LEUabcpp |
| AL011_RS01490    | Pyrimidine Metabolism                | DHORDi  | <b>YCPsy</b>                                  |          |
| AL011_RS01685    | Fatty Acid Biosynthesis              | 3HAD100 | AL011_RS Purine Metabolism                    | AIRCr    |
| AL011_RS01865    | Folate Biosynthesis                  | DHFS    | AL011_RS Oxidative Phosphorylation            | PPA      |
| AL011_RS02120    | Fatty Acid Biosynthesis              | 3HAD120 | AL011_RS Fatty Acid Biosynthesis              | ACCOAC   |
| AL011_RS02900    | Purine Metabolism                    | ADSS    | AL011_RS Purine and Pyrimidine Biosynthesis   | DHORD2   |
| AL011_RS02905    | Porphyryn and Chlorophyll Metabolism | SHCHF   | AL011_RS Gluconeogenesis                      | PGM      |
| AL011_RS03930    | Lysine Biosynthesis                  | DHDPRy  | AL011_RS Glycolysis                           | HEX1     |
| AL011_RS04235    | Purine Metabolism                    | PRAIS   | AL011_RS Pantothenate and CoA Biosynthesis    | DHPM1    |
| AL011_RS04850    | Peptidoglycan Biosynthesis           | UAGPT3  | AL011_RS Alanine and Aspartate Metabolism     | ASNS1    |
| <b>Summary</b>   |                                      |         | AL011_RS Riboflavin Metabolism                | RBFSb    |
|                  |                                      |         | AL011_RS Pyrimidine Metabolism                | DHORDi   |
|                  |                                      |         | AL011_RS Fatty Acid Biosynthesis              | 3HAD100  |
|                  |                                      |         | AL011_RS Folate Biosynthesis                  | DHFS     |
|                  |                                      |         | AL011_RS Fatty Acid Biosynthesis              | 3HAD120  |
|                  |                                      |         | AL011_RS Transport                            | HSabcpp  |

|                                               |                 |
|-----------------------------------------------|-----------------|
| AL011_RS Purine Metabolism                    | ADSS            |
| AL011_RS Porphyrin and Chlorophyll Metabolism | SHCHF           |
| AL011_RS Lysine Biosynthesis                  | DHDPRy          |
| AL011_RS Vitamin B6 Metabolism                | PDX5POi         |
| AL011_RS Purine Metabolism                    | PRAIS           |
| AL011_RS Arginine and Proline Metabolism      | ORNCD           |
| AL011_RS Peptidoglycan Biosynthesis           | UAGPT3          |
| <u>AL011_RS Transport</u>                     | <u>LEUabcpp</u> |

## Supplementary Table 10. List of reactions without Gene-Protein-Reaction associations

### Common reactions across C Las models

| Reaction ID | Reaction Name                                                        | Subsystem                       | Flux M15 | Reaction Notes                                                                 |
|-------------|----------------------------------------------------------------------|---------------------------------|----------|--------------------------------------------------------------------------------|
| GDBTALDH    | GDBTALDH                                                             | Arginine and Proline Metabolism | 0.01     | Reaction added during gap filling                                              |
| GUDBUTNAH   | GUDBUTNAH                                                            | Arginine and Proline Metabolism | 0.01     | Reaction added during gap filling                                              |
| OARGDC      | OARGDC                                                               | Arginine and Proline Metabolism | 0.01     | Reaction added during gap filling                                              |
| CYSS        | Cysteine synthase                                                    | Cysteine Metabolism             | 0.00     | Reaction added during gap filling                                              |
| CFAS160E    | Cyclopropane fatty acid synthase (Phosphatidylethanolamine, n-C16:0) | Fatty Acid Biosynthesis         | 0.00     | Reaction added during gap filling, reaccion associated with pathogenic traits  |
| CFAS160G    | Cyclopropane fatty acid synthase (Phosphatidylglycerol, n-C16:0)     | Fatty Acid Biosynthesis         | 0.00     | Reaction added during gap filling, reaccion associated with pathogenic traits  |
| CFAS180E    | Cyclopropane fatty acid synthase (Phosphatidylethanolamine, n-C18:0) | Fatty Acid Biosynthesis         | 0.00     | Reaction added during gap filling, reaccion associated with pathogenic traits  |
| CFAS180G    | Cyclopropane fatty acid synthase (Phosphatidylglycerol, n-C18:0)     | Fatty Acid Biosynthesis         | 0.00     | Reaction added during gap filling, reaccion associated with pathogenic traits  |
| PABB        | PABB                                                                 | Folate Biosynthesis             | 0.00     | Reaction found for L. BT-1 [GEM for BT-1 present work], not reference for Clas |
| DHNPA       | Dihydroneopterin aldolase                                            | Folate Biosynthesis             | 0.00     | Reaction found for L. BT-1 [Lai et al., 2016/GEM for BT-1]                     |
| DNMPPA      | Dihydroneopterin monophosphate dephosphorylase                       | Folate Biosynthesis             | 0.00     | Reaction added during gap filling                                              |
| FOLD3       | Dihydropteroate synthase                                             | Folate Biosynthesis             | 0.00     | Reaction found for L. BT-1 [Lai et al., 2016/GEM for BT-1]                     |
| GCALDD      | Glycolaldehyde dehydrogenase                                         | Folate Biosynthesis             | 0.00     | Reaction found for L. BT-1 [GEM for BT-1 present work], not reference for Clas |
| GLUDy       | Glutamate dehydrogenase (NADP)                                       | Glutamate Metabolism            | 0.00     | Reaction added during gap filling                                              |
| SSALy       | Succinate-semialdehyde dehydrogenase (NADP)                          | Glutamate Metabolism            | 0.01     | Reaction added during gap filling                                              |
| PGPP120     | Phosphatidylglycerol phosphate phosphatase (n-C14:0)                 | Glycerophospholipid Metabolism  | 0.00     | Reaction added during gap filling, reaccion associated with pathogenic traits  |
| PGPP160     | Phosphatidylglycerol phosphate phosphatase (n-C16:0)                 | Glycerophospholipid Metabolism  | 0.00     | Reaction added during gap filling, reaccion associated with pathogenic traits  |

|              |                                                              |                                          |       |                                                                                |
|--------------|--------------------------------------------------------------|------------------------------------------|-------|--------------------------------------------------------------------------------|
| PGPP161      | Phosphatidylglycerol phosphate phosphatase (n-C16:1)         | Glycerophospholipid Metabolism           | 0.00  | Reaction added during gap filling, reaccion associated with pathogenic traits  |
| PGPP180      | Phosphatidylglycerol phosphate phosphatase (n-C18:0)         | Glycerophospholipid Metabolism           | 0.00  | Reaction added during gap filling, reaccion associated with pathogenic traits  |
| PGPP181      | Phosphatidylglycerol phosphate phosphatase (n-C18:1)         | Glycerophospholipid Metabolism           | 0.00  | Reaction added during gap filling, reaccion associated with pathogenic traits  |
| PSD120       | Phosphatidylserine decarboxylase (n-C12:0)                   | Glycerophospholipid Metabolism           | 0.00  | Reaction added during gap filling, reaccion associated with pathogenic traits  |
| PSD180       | Phosphatidylserine decarboxylase (n-C18:0)                   | Glycerophospholipid Metabolism           | 0.00  | Reaction added during gap filling, reaccion associated with pathogenic traits  |
| PSSA120      | Phosphatidylserine syntase (n-C12:0)                         | Glycerophospholipid Metabolism           | 0.00  | Reaction found for L. BT-1 [GEM for BT-1 present work], not reference for Clas |
| PSSA180      | Phosphatidylserine syntase (n-C18:0)                         | Glycerophospholipid Metabolism           | 0.00  | Reaction found for L. BT-1 [GEM for BT-1 present work], not reference for Clas |
| PSD181       | Phosphatidylserine decarboxylase (n-C18:1)                   | Glycerophospholipid Metabolism           | 0.00  | Reaction added during gap filling, reaccion associated with pathogenic traits  |
| PSSA181      | Phosphatidylserine syntase (n-C18:1)                         | Glycerophospholipid Metabolism           | 0.00  | Reaction found for L. BT-1 [GEM for BT-1 present work], not reference for Clas |
| SERD_L       | L-serine deaminase                                           | Glycine, Serine and threonine metabolism | -0.31 | Reaction added during gap filling                                              |
| THRD_L       | L-threonine deaminase                                        | Glycine, Serine and threonine metabolism | 0.00  | Reaction added during gap filling                                              |
| PGI          | Glucose-6-phosphate isomerase                                | Glycolysis                               | -0.06 | Reaction added during gap filling                                              |
| ALDD2x_copy2 | Aldehyde dehydrogenase (acetaldehyde, NAD)                   | Glycolysis                               | 0.00  | Reaction added during gap filling                                              |
| GLCtex       | Glucose transport via diffusion (extracellular to periplasm) | Glycolysis                               | 0.04  | Reaction added during gap filling                                              |
| HISTD        | Histidinol dehydrogenase                                     | Histidine Metabolism                     | 0.00  | Reaction found for L. BT-1 [GEM for BT-1 present work], not reference for Clas |
| HISTP        | Histidinol-phosphatase                                       | Histidine Metabolism                     | 0.00  | Reaction found for L. BT-1 [GEM for BT-1 present work], not reference for Clas |
| HSTPT        | Histidinol-phosphate transaminase                            | Histidine Metabolism                     | 0.00  | Reaction found for L. BT-1 [GEM for BT-1 present work], not reference for Clas |
| IG3PS        | Imidazole-glycerol-3-phosphate synthase                      | Histidine Metabolism                     | 0.00  | Reaction found for L. BT-1 [GEM for BT-1 present work], not reference for Clas |



|          |                                                                                                   |                                                |      |                                                                                                           |
|----------|---------------------------------------------------------------------------------------------------|------------------------------------------------|------|-----------------------------------------------------------------------------------------------------------|
| IGPDH    | Imidazoleglycerol-phosphate dehydratase                                                           | Histidine Metabolism                           | 0.00 | Reaction found for L. BT-1 [GEM for BT-1 present work], not reference for Clas                            |
| PRAMPC   | Phosphoribosyl-AMP cyclohydrolase                                                                 | Histidine Metabolism                           | 0.00 | Reaction found for L. BT-1 [GEM for BT-1 present work], not reference for Clas                            |
| PRATPP   | Phosphoribosyl-ATP pyrophosphatase                                                                | Histidine Metabolism                           | 0.00 | Reaction found for L. BT-1 [GEM for BT-1 present work], not reference for Clas                            |
| PRMICI   | 1-(5-phosphoribosyl)-5-[(5-phosphoribosylamino)methylideneamino]imidazole-4-carboxamide isomerase | Histidine Metabolism                           | 0.00 | Reaction found for L. BT-1 [GEM for BT-1 present work], not reference for Clas                            |
| HGNTOR   | Homogentisate oxygen 1 2 oxidoreductase decyclizing                                               | Homogentisate Pathway                          | 0.00 | Reaction added during gap filling                                                                         |
| TYRTA    | Tyrosine transaminase                                                                             | Homogentisate Pathway                          | 0.00 | Reaction added during gap filling                                                                         |
| FALDDH   | FALDDH                                                                                            | Methane Metabolism                             | 0.00 | Reaction added during gap filling                                                                         |
| SHSL2r   | O-succinylhomoserine lyase (H2S)                                                                  | Methionine Metabolism                          | 0.00 | Reaction added during gap filling                                                                         |
| SHSL4r   | O succinylhomoserine lyase elimination reversible                                                 | Methionine Metabolism                          | 0.00 | Reaction found for L. BT-1 [GEM for BT-1 present work], not reference for Clas                            |
| NNDPR    | Nicotinate-nucleotide diphosphorylase (carboxylating)                                             | Nicotinate and Nicotinamide                    | 0.00 | Reaction added during gap filling                                                                         |
| QULNS    | Quinolinate synthase                                                                              | Nicotinate and Nicotinamide                    | 0.00 | Reaction added during gap filling                                                                         |
| MTHFR3   | 5 10 methylenetetrahydrofolate reductase NADPH                                                    | One Carbon pool by folate                      | 0.00 | Homologous gene was not found, however expression data showed existence of this protein [Yan et al, 2013] |
| ACLS     | Acetolactate synthase                                                                             | Pantothenate and CoA Biosynthesis              | 0.00 | Reaction added during gap filling                                                                         |
| DHAD1    | Dihydroxy-acid dehydratase (2,3-dihydroxy-3-methylbutanoate)                                      | Pantothenate and CoA Biosynthesis              | 0.00 | Reaction added during gap filling                                                                         |
| MOHMT    | 3-methyl-2-oxobutanoate hydroxymethyltransferase                                                  | Pantothenate and CoA Biosynthesis              | 0.00 | Reaction found for L. BT-1 [GEM for BT-1 present work], not reference for Clas                            |
| TALA     | Transaldolase                                                                                     | Pathway                                        | 0.03 | Reaction added during gap filling                                                                         |
| HADPCOAH | 3-hydroxyadipyl-CoA dehydrogenase                                                                 | pathway                                        | 0.00 | Reaction added during gap filling                                                                         |
| CHORM    | Chorismate mutase                                                                                 | Phenylalanine Tyrosine Tryptophan Biosynthesis | 0.00 | Reaction added during gap filling                                                                         |
| CHORS    | Chorismate synthase                                                                               | Phenylalanine Tyrosine Tryptophan Biosynthesis | 0.00 | Reaction added during gap filling                                                                         |

|          |                                                                     |                                                   |       |                                                            |
|----------|---------------------------------------------------------------------|---------------------------------------------------|-------|------------------------------------------------------------|
| DHQTi    | 3-dehydroquinate dehydratase, irreversible                          | Phenylalanine Tyrosine<br>Tryptophan Biosynthesis | 0.00  | Reaction added during gap filling                          |
| DHQS     | 3-dehydroquinate synthase                                           | Phenylalanine Tyrosine<br>Tryptophan Biosynthesis | 0.00  | Reaction found for L. BT-1 [Lai et al., 2016/GEM for BT-1] |
| PHETA1   | Phenylalanine transaminase                                          | Phenylalanine Tyrosine<br>Tryptophan Biosynthesis | 0.00  | Reaction added during gap filling                          |
| SHK3Dr   | Shikimate dehydrogenase                                             | Phenylalanine Tyrosine<br>Tryptophan Biosynthesis | 0.00  | Reaction added during gap filling                          |
| SHKK     | Shikimate kinase                                                    | Phenylalanine Tyrosine<br>Tryptophan Biosynthesis | 0.00  | Reaction added during gap filling                          |
| TRPS2    | Tryptophan synthase (indole)                                        | Phenylalanine Tyrosine<br>Tryptophan Biosynthesis | 0.00  | Reaction added during gap filling                          |
| GLUTRR   | Glutamyl-tRNA reductase                                             | Porphyrin and Chlorophyll<br>Metabolism           | 0.00  | Reaction added during gap filling                          |
| PYNP2r   | Pyrimidine-nucleoside phosphorylase (uracil)                        | Pyrimidine Metabolism                             | 0.00  | Reaction added during gap filling                          |
| R15BPK   | Ribose-1,5-bisphosphokinase                                         | Ribose Metabolism                                 | 0.00  | Reaction added during gap filling                          |
| R1PK     | Ribose 1-phosphokinase                                              | Ribose Metabolism                                 | 0.00  | Reaction added during gap filling                          |
| CDPMEK   | 4-(cytidine 5-diphospho)-2-C-methyl-D-erythritol kinase             | Steroid biosynthesis                              | 0.00  | Reaction added during gap filling                          |
| DXPRIi   | 1-deoxy-D-xylulose reductoisomerase                                 | Steroid biosynthesis                              | 0.00  | Reaction added during gap filling                          |
| MECDPS   | 2-C-methyl-D-erythritol 2,4-cyclodiphosphate synthase               | Steroid biosynthesis                              | 0.00  | Reaction added during gap filling                          |
| MEPCT    | 2-C-methyl-D-erythritol 4-phosphate cytidyltransferase              | Steroid biosynthesis                              | 0.00  | Reaction added during gap filling                          |
| APSR     | Adenosine 5-phosphosulfate reductase; FMNH2-dependent monooxygenase | Sulfur Metabolism                                 | 0.00  | Reaction added during gap filling                          |
| FDMO2    | (methanesulfonate)                                                  | Sulfur Metabolism                                 | 0.00  | Reaction added during gap filling                          |
| SADT     | Sulfate adenyltransferase                                           | Sulfur Metabolism                                 | 0.00  | Reaction added during gap filling                          |
| GLYtex   | Glycine transport via diffusion (extracellular to periplasm)        | Transport                                         | -1.14 | Modeling reaction added to simulate culture media          |
| H2Otp    | H2O transport via diffusion (periplasm)                             | Transport                                         | -0.48 | Modeling reaction added to simulate culture media          |
| AKGt2rpp | 2-oxoglutarate reversible transport via symport (periplasm)         | Transport                                         | -0.33 | Modeling reaction added to simulate culture media          |

|             |                                                                          |           |       |                                                     |
|-------------|--------------------------------------------------------------------------|-----------|-------|-----------------------------------------------------|
| AKGtex      | Alpha-ketoglutarate transport via diffusion (extracellular to periplasm) | Transport | -0.33 | Modeling reaction added to simulate culture media   |
| ORNtex      | Ornithine transport via diffusion (extracellular to periplasm)           | Transport | -0.01 | Modeling reaction added to simulate culture media   |
| 2DHGLCNtex  | 2DHGLCNtex                                                               | Transport | 0.00  | Modeling reaction with boundaries lb=0 and up= 1000 |
| 34DHCINMtex | 34DHCINMtex                                                              | Transport | 0.00  | Modeling reaction with boundaries lb=0 and up= 1000 |
| 34DHCINMtp  | 34DHCINMtp                                                               | Transport | 0.00  | Modeling reaction with boundaries lb=0 and up= 1000 |
| 3OXOADPt_ex | 3OXOADPt LPAREN ex RPAREN                                                | Transport | 0.00  | Modeling reaction with boundaries lb=0 and up= 1000 |
| 4HBZtex     | 4-Hydroxybenzoate transport (extracellular)                              | Transport | 0.00  | Modeling reaction with boundaries lb=0 and up= 1000 |
| ABUTt2pp    | 4-aminobutyrate transport in via proton symport (periplasm)              | Transport | 0.00  | Modeling reaction with boundaries lb=0 and up= 1000 |
| ABUTtex     | 4-aminobutyrate transport via diffusion (extracellular to periplasm)     | Transport | 0.00  | Modeling reaction with boundaries lb=0 and up= 1000 |
| ACONCtex    | Cisconitrat transport via diffusion extracellular to periplasm           | Transport | 0.00  | Modeling reaction with boundaries lb=0 and up= 1000 |
| ACTex       | Acetate transport via diffusion (extracellular to periplasm)             | Transport | 0.00  | Modeling reaction with boundaries lb=0 and up= 1000 |
| ALAtex      | L-alanine transport via diffusion (extracellular to periplasm)           | Transport | 0.00  | Modeling reaction with boundaries lb=0 and up= 1000 |
| CATECHOLtex | CATECHOLtex                                                              | Transport | 0.00  | Modeling reaction with boundaries lb=0 and up= 1000 |
| CATECHOLtp  | CATECHOLtp                                                               | Transport | 0.00  | Modeling reaction with boundaries lb=0 and up= 1000 |
| CHLtex      | Choline transport via diffusion (extracellular to periplasm)             | Transport | 0.00  | Modeling reaction with boundaries lb=0 and up= 1000 |
| CO2tex      | CO2 transport via diffusion (extracellular to periplasm)                 | Transport | 0.00  | Modeling reaction with boundaries lb=0 and up= 1000 |
| CO2tp       | CO2 transporter via diffusion (periplasm)                                | Transport | 0.00  | Modeling reaction with boundaries lb=0 and up= 1000 |

|           |                                                                                                        |           |      |                                                     |
|-----------|--------------------------------------------------------------------------------------------------------|-----------|------|-----------------------------------------------------|
| CONFRLtex | CONFRLtex                                                                                              | Transport | 0.00 | Modeling reaction with boundaries lb=0 and up= 1000 |
| CONFRLtpp | CONFRLtpp                                                                                              | Transport | 0.00 | Modeling reaction with boundaries lb=0 and up= 1000 |
| DCAtex    | Decanoate transport via diffusion (extracellular to periplasm)                                         | Transport | 0.00 | Modeling reaction with boundaries lb=0 and up= 1000 |
| DDCAtexi  | Fatty acid (dodecanoate) transport via facilitated irreversible diffusion (extracellular to periplasm) | Transport | 0.00 | Modeling reaction with boundaries lb=0 and up= 1000 |
| D_LACt2pp | D-lactate transport via proton symport (periplasm)                                                     | Transport | 0.00 | Modeling reaction with boundaries lb=0 and up= 1000 |
| D_LACtex  | D-lactate transport via diffusion (extracellular to periplasm)                                         | Transport | 0.00 | Modeling reaction with boundaries lb=0 and up= 1000 |
| ETHSO3tex | Ethanesulfonate transport via diffusion (extracellular to periplasm)                                   | Transport | 0.00 | Modeling reaction with boundaries lb=0 and up= 1000 |
| GAt1      | GAt1                                                                                                   | Transport | 0.00 | Modeling reaction with boundaries lb=0 and up= 1000 |
| GAt2pp    | GAt2pp                                                                                                 | Transport | 0.00 | Modeling reaction with boundaries lb=0 and up= 1000 |
| GLCNtex   | D-gluconate transport via diffusion (extracellular to periplasm)                                       | Transport | 0.00 | Modeling reaction with boundaries lb=0 and up= 1000 |
| GLUtex    | L-glutamate transport via diffusion (extracellular to periplasm)                                       | Transport | 0.00 | Modeling reaction with boundaries lb=0 and up= 1000 |
| GLYBtex   | Glycine betaine transport via diffusion (extracellular to periplasm)                                   | Transport | 0.00 | Modeling reaction with boundaries lb=0 and up= 1000 |
| GLYCtex   | Glycerol transport via diffusion (extracellular to periplasm)                                          | Transport | 0.00 | Modeling reaction with boundaries lb=0 and up= 1000 |
| H2tex     | Hydrogen transport via diffusion (extracellular to periplasm)                                          | Transport | 0.00 | Modeling reaction with boundaries lb=0 and up= 1000 |
| H2tpp     | Hydrogen transport diffusion (periplasm)                                                               | Transport | 0.00 | Modeling reaction with boundaries lb=0 and up= 1000 |
| HDCAtexi  | Hexadecanoate transport via facilitated irreversible diffusion (extracellular to periplasm)            | Transport | 0.00 | Modeling reaction with boundaries lb=0 and up= 1000 |

|            |                                                                       |           |      |                                                     |
|------------|-----------------------------------------------------------------------|-----------|------|-----------------------------------------------------|
| ICITt_kt   | ICITt kt                                                              | Transport | 0.00 | Modeling reaction with boundaries lb=0 and up= 1000 |
| L_LACt2rpp | L-lactate reversible transport via proton symport (periplasm)         | Transport | 0.00 | Modeling reaction with boundaries lb=0 and up= 1000 |
| L_LACtex   | L-lactate transport via diffusion (extracellular to periplasm)        | Transport | 0.00 | Modeling reaction with boundaries lb=0 and up= 1000 |
| MSO3tex    | Methanesulfonate transport via diffusion (extracellular to periplasm) | Transport | 0.00 | Modeling reaction with boundaries lb=0 and up= 1000 |
| M_XYLtpp   | XYLtpp                                                                | Transport | 0.00 | Modeling reaction with boundaries lb=0 and up= 1000 |
| M_Xylt1    | Xylt1                                                                 | Transport | 0.00 | Modeling reaction with boundaries lb=0 and up= 1000 |
| NAt3_1p5pp | Sodium proton antiporter (H:NA is 1.5) (periplasm)                    | Transport | 0.00 | Modeling reaction with boundaries lb=0 and up= 1000 |
| NAtex      | Sodium transport via diffusion (extracellular to periplasm)           | Transport | 0.00 | Modeling reaction with boundaries lb=0 and up= 1000 |
| NI2tex     | Nickel transport via diffusion (extracellular to periplasm)           | Transport | 0.00 | Modeling reaction with boundaries lb=0 and up= 1000 |
| NI2uabcpp  | Nickel transport via ABC system (uptake, periplasm)                   | Transport | 0.00 | Modeling reaction with boundaries lb=0 and up= 1000 |
| NO2tex     | Nitrite transport via diffusion (extracellular to periplasm)          | Transport | 0.00 | Modeling reaction with boundaries lb=0 and up= 1000 |
| OCTAtex    | Octanoate transport via diffusion (extracellular to periplasm)        | Transport | 0.00 | Modeling reaction with boundaries lb=0 and up= 1000 |
| PENTSOtex  | PENTSOtex                                                             | Transport | 0.00 | Modeling reaction with boundaries lb=0 and up= 1000 |
| PROtex     | L-proline transport via diffusion (extracellular to periplasm)        | Transport | 0.00 | Modeling reaction with boundaries lb=0 and up= 1000 |
| PTRCtex    | Putrescine transport via diffusion (extracellular to periplasm)       | Transport | 0.00 | Modeling reaction with boundaries lb=0 and up= 1000 |
| P_XYLtpp   | P XYLtpp                                                              | Transport | 0.00 | Modeling reaction with boundaries lb=0 and up= 1000 |
| P_Xylt1    | P Xylt1                                                               | Transport | 0.00 | Modeling reaction with boundaries lb=0 and up= 1000 |

|             |                                                                                              |           |      |                                                     |
|-------------|----------------------------------------------------------------------------------------------|-----------|------|-----------------------------------------------------|
| QUIN2tex    | Quinate transport via diffusion (extracellular to periplasm)                                 | Transport | 0.00 | Modeling reaction with boundaries lb=0 and up= 1000 |
| QUINtpp     | QUINtpp                                                                                      | Transport | 0.00 | Modeling reaction with boundaries lb=0 and up= 1000 |
| RBK         | Ribokinase                                                                                   | Transport | 0.00 | Modeling reaction with boundaries lb=0 and up= 1000 |
| RIBtex      | Ribose transport via diffusion (extracellular to periplasm)                                  | Transport | 0.00 | Modeling reaction with boundaries lb=0 and up= 1000 |
| SO4t4_2     | Sulfate transport via sodium symport                                                         | Transport | 0.00 | Modeling reaction with boundaries lb=0 and up= 1000 |
| SO4tex      | Sulfate transport via diffusion (extracellular to periplasm)                                 | Transport | 0.00 | Modeling reaction with boundaries lb=0 and up= 1000 |
| SPMDtex     | Spermidine transport via diffusion (extracellular to periplasm)                              | Transport | 0.00 | Modeling reaction with boundaries lb=0 and up= 1000 |
| SUCCtex     | Succinate transport via diffusion (extracellular to periplasm)                               | Transport | 0.00 | Modeling reaction with boundaries lb=0 and up= 1000 |
| T4HCINNMtex | T4HCINNMtex                                                                                  | Transport | 0.00 | Modeling reaction with boundaries lb=0 and up= 1000 |
| T4HCINNMtpp | T4HCINNMtpp                                                                                  | Transport | 0.00 | Modeling reaction with boundaries lb=0 and up= 1000 |
| TAURtex     | Taurine transport via diffusion (extracellular to periplasm)                                 | Transport | 0.00 | Modeling reaction with boundaries lb=0 and up= 1000 |
| TOLtex      | Toluene outer membrane porin transport                                                       | Transport | 0.00 | Modeling reaction with boundaries lb=0 and up= 1000 |
| TSULtex     | Thiosulfate transport via diffusion (extracellular to periplasm)                             | Transport | 0.00 | Modeling reaction with boundaries lb=0 and up= 1000 |
| TTDCAtexi   | Tetradecanoate transport via facilitated irreversible diffusion (extracellular to periplasm) | Transport | 0.00 | Modeling reaction with boundaries lb=0 and up= 1000 |
| FE2t        | Iron II transport                                                                            | Transport | 0.00 | Modeling reaction with boundaries lb=0 and up= 1000 |
| NACt1pp     | NACt1pp                                                                                      | Transport | 0.00 | Modeling reaction with boundaries lb=0 and up= 1000 |
| NACtex      | Nicotinic acid transport via diffusion (extracellular to periplasm)                          | Transport | 0.00 | Modeling reaction with boundaries lb=0 and up= 1000 |

|            |                                                                      |           |      |                                                     |
|------------|----------------------------------------------------------------------|-----------|------|-----------------------------------------------------|
| CYStex     | L-cysteine transport via diffusion (extracellular to periplasm)      | Transport | 0.00 | Modeling reaction with boundaries lb=0 and up= 1000 |
| HISStex    | L-histidine transport via diffusion (extracellular to periplasm)     | Transport | 0.00 | Modeling reaction with boundaries lb=0 and up= 1000 |
| TYRt2rpp   | L-tyrosine reversible transport via proton symport (periplasm)       | Transport | 0.00 | Modeling reaction with boundaries lb=0 and up= 1000 |
| TYRttx     | L-tyrosine transport via diffusion (extracellular to periplasm)      | Transport | 0.00 | Modeling reaction with boundaries lb=0 and up= 1000 |
| METttx     | L-methionine transport via diffusion (extracellular to periplasm)    | Transport | 0.00 | Modeling reaction with boundaries lb=0 and up= 1000 |
| PHEt2rpp   | L-phenylalanine reversible transport via proton symport (periplasm)  | Transport | 0.00 | Modeling reaction with boundaries lb=0 and up= 1000 |
| PHEttx     | L-phenylalanine transport via diffusion (extracellular to periplasm) | Transport | 0.00 | Modeling reaction with boundaries lb=0 and up= 1000 |
| THRttx     | L-threonine transport via diffusion (extracellular to periplasm)     | Transport | 0.00 | Modeling reaction with boundaries lb=0 and up= 1000 |
| ILEttx     | L-isoleucine transport via diffusion (extracellular to periplasm)    | Transport | 0.00 | Modeling reaction with boundaries lb=0 and up= 1000 |
| LEUttx     | L-leucine transport via diffusion (extracellular to periplasm)       | Transport | 0.01 | Modeling reaction with boundaries lb=0 and up= 1000 |
| MALttx     | Malate transport via diffusion (extracellular to periplasm)          | Transport | 0.01 | Modeling reaction with boundaries lb=0 and up= 1000 |
| PIt2rpp    | Phosphate reversible transport via symport (periplasm)               | Transport | 0.01 | Modeling reaction with boundaries lb=0 and up= 1000 |
| PIttx      | Phosphate transport via diffusion (extracellular to periplasm)       | Transport | 0.01 | Modeling reaction with boundaries lb=0 and up= 1000 |
| ARGORNt7pp | Arginine/ornithine antiporter (periplasm)                            | Transport | 0.01 | Modeling reaction with boundaries lb=0 and up= 1000 |
| ARGttx     | L-arginine transport via diffusion (extracellular to periplasm)      | Transport | 0.01 | Modeling reaction with boundaries lb=0 and up= 1000 |
| O2ttx      | Oxygen transport via diffusion (extracellular to periplasm)          | Transport | 0.01 | Modeling reaction with boundaries lb=0 and up= 1000 |
| O2tpp      | O2 transport via diffusion (periplasm)                               | Transport | 0.01 | Modeling reaction with boundaries lb=0 and up= 1000 |

|              |                                                                     |                                      |      |                                                        |
|--------------|---------------------------------------------------------------------|--------------------------------------|------|--------------------------------------------------------|
| ASPtex       | L-aspartate transport via diffusion<br>(extracellular to periplasm) | Transport                            | 0.21 | Modeling reaction with boundaries lb=0 and<br>up= 1000 |
| SERt2rpp     | L-serine reversible transport via proton<br>symport (periplasm)     | Transport                            | 0.27 | Modeling reaction with boundaries lb=0 and<br>up= 1000 |
| SERtex       | L-serine transport via diffusion<br>(extracellular to periplasm)    | Transport                            | 0.27 | Modeling reaction with boundaries lb=0 and<br>up= 1000 |
| CITt_kt      | Citrate proton symport periplasm                                    | Transport                            | 0.35 | Modeling reaction with boundaries lb=0 and<br>up= 1000 |
| NH4tex       | Ammonia transport via diffusion<br>(extracellular to periplasm)     | Transport                            | 0.69 | Modeling reaction with boundaries lb=0 and<br>up= 1000 |
| NH4tpp       | Ammonia reversible transport<br>(periplasm)                         | Transport                            | 0.69 | Modeling reaction with boundaries lb=0 and<br>up= 1000 |
| btn_etex     | btn_etransport via diffusion                                        | Transport                            | 0.00 | Modeling reaction with boundaries lb=0 and<br>up= 1000 |
| ins_etex     | ins_etransport via diffusion                                        | Transport                            | 0.00 | Modeling reaction with boundaries lb=0 and<br>up= 1000 |
| thm_etex     | thm_etransport via diffusion                                        | Transport                            | 0.00 | Modeling reaction with boundaries lb=0 and<br>up= 1000 |
| urea_etex    | urea_etransport via diffusion                                       | Transport                            | 0.00 | Modeling reaction with boundaries lb=0 and<br>up= 1000 |
| ribflv_etex  | ribflv_etransport via diffusion                                     | Transport                            | 0.00 | Modeling reaction with boundaries lb=0 and<br>up= 1000 |
| pnto__R_etex | pnto__R_etransport via diffusion                                    | Transport                            | 0.00 | Modeling reaction with boundaries lb=0 and<br>up= 1000 |
| 4abz_etex    | 4abz_etransport via diffusion                                       | Transport                            | 0.00 | Modeling reaction with boundaries lb=0 and<br>up= 1000 |
| trp__L_etex  | trp__L_etransport via diffusion                                     | Transport                            | 0.00 | Modeling reaction with boundaries lb=0 and<br>up= 1000 |
| asn__L_etex  | asn__L_etransport via diffusion                                     | Transport                            | 0.00 | Modeling reaction with boundaries lb=0 and<br>up= 1000 |
| gln__L_etex  | gln__L_etransport via diffusion                                     | Transport                            | 0.03 | Modeling reaction with boundaries lb=0 and<br>up= 1000 |
| ORNDC        | Ornithine Decarboxylase                                             | Urea cycle/amino group<br>metabolism | 0.00 | Reaction added during gap filling                      |



|                        |                                                               |                                            |              |                                                                               |
|------------------------|---------------------------------------------------------------|--------------------------------------------|--------------|-------------------------------------------------------------------------------|
| ILETA                  | Isoleucine transaminase                                       | Valine, leucine and isoleucine degradation | 0.00         | Reaction added during gap filling                                             |
| LEUTA                  | Leucine transaminase                                          | Valine, leucine and isoleucine degradation | 0.00         | Reaction added during gap filling                                             |
| VALTA                  | Valine transaminase                                           | Valine, leucine and isoleucine degradation | 0.00         | Reaction added during gap filling                                             |
| DHAD2                  | Dihydroxy-acid dehydratase (2,3-dihydroxy-3-methylpentanoate) | Valine, Leucine, and Isoleucine Metabolism | 0.00         | Reaction added during gap filling                                             |
| IPPS                   | 2-isopropylmalate synthase                                    | Valine, Leucine, and Isoleucine Metabolism | 0.00         | Reaction added during gap filling                                             |
| OMCDC                  | 2-Oxo-4-methyl-3-carboxypentanoate decarboxylation            | Valine, Leucine, and Isoleucine Metabolism | 0.00         | Reaction added during gap filling                                             |
| <b>Reactions in A4</b> |                                                               |                                            |              |                                                                               |
| ADCL                   | 4-aminobenzoate synthase                                      | Folate Biosynthesis                        | 0            | Reaction added during gap filling                                             |
| GTHPi                  | Glutathione peridoxase                                        | Glutathione Metabolism                     | -0.001534133 | Reaction added during gap filling                                             |
| H2Otex                 | H2O transport via diffusion (extracellular to periplasm)      | Transport                                  | -0.482132396 | Modeling reaction with boundaries lb=0 and up= 1000                           |
| Htex                   | Proton transport via diffusion (extracellular to periplasm)   | Transport                                  | -0.039844523 | Modeling reaction with boundaries lb=0 and up= 1000                           |
| IPDDI                  | Isopentenyl-diphosphate D-isomerase                           | Steroid biosynthesis                       | 7.66E-06     | Reaction added during gap filling, reaccion associated with pathogenic traits |
| PGSA120                | Phosphatidylglycerol synthase (n-C12:0)                       | Glycerophospholipid Metabolism             | 7.66E-06     | Reaction added during gap filling, reaccion associated with pathogenic traits |
| PGSA160                | Phosphatidylglycerol synthase (n-C16:0)                       | Glycerophospholipid Metabolism             | 7.66E-06     | Reaction added during gap filling, reaccion associated with pathogenic traits |
| PGSA161                | Phosphatidylglycerol synthase (n-C16:1)                       | Glycerophospholipid Metabolism             | 7.66E-06     | Reaction added during gap filling, reaccion associated with pathogenic traits |
| PGSA180                | Phosphatidylglycerol synthase (n-C18:0)                       | Glycerophospholipid Metabolism             | 7.66E-06     | Reaction added during gap filling, reaccion associated with pathogenic traits |
| PGSA181                | Phosphatidylglycerol synthase (n-C18:1)                       | Glycerophospholipid Metabolism             | 7.66E-06     | Reaction added during gap filling, reaccion associated with pathogenic traits |
| PSD160                 | Phosphatidylserine decarboxylase (n-C16:0)                    | Glycerophospholipid Metabolism             | 7.66E-06     | Reaction added during gap filling, reaccion associated with pathogenic traits |
| PSD161                 | Phosphatidylserine decarboxylase (n-C16:1)                    | Glycerophospholipid Metabolism             | 1.53E-05     | Reaction added during gap filling, reaccion associated with pathogenic traits |

|         |                                                               |                                                |             |                                                                                                  |
|---------|---------------------------------------------------------------|------------------------------------------------|-------------|--------------------------------------------------------------------------------------------------|
| PSSA160 | Phosphatidylserine syntase (n-C16:0)                          | Glycerophospholipid Metabolism                 | 7.66E-06    | Reaction found for L. BT-1 [GEM for BT-1 present work], not reference for Clas                   |
| PSSA161 | Phosphatidylserine syntase (n-C16:1)                          | Glycerophospholipid Metabolism                 | 1.53E-05    | Reaction found for L. BT-1 [GEM for BT-1 present work], not reference for Clas                   |
| RBFSa   | Riboflavin synthase                                           | Riboflavin Metabolism                          | 0           | "Homologous gene was not found, however the enzyme was predicted [Subhraveti et al, ]            |
| SHCHD2  | Sirohydrochlorin dehydrogenase (NAD)                          | Porphyrin and Chlorophyll Metabolism           | 7.66E-06    | Reaction added during gap filling                                                                |
| TRPS3   | Tryptophan synthase (indoleglycerol phosphate)                | Phenylalanine Tyrosine Tryptophan Biosynthesis | 0           | Reaction added during gap filling                                                                |
| UPP3MT  | Uroporphyrinogen methyltransferase                            | Porphyrin and Chlorophyll Metabolism           | 7.66E-06    | Reaction added during gap filling                                                                |
| UPP3S   | Uroporphyrinogen-III synthase                                 | Porphyrin and Chlorophyll Metabolism           | 1.53E-05    | Reaction found for L. asiaticus [Yan et al. 2013/GEM for L. asiaticus]                           |
| VALtex  | L-valine transport via diffusion (extracellular to periplasm) | Transport                                      | 0.006154903 | Homologous gene was not found, however the activity was predicted in L. BT1 [Subhraveti et al, ] |
| VNLNpp  | VNLNpp                                                        | Transport                                      | 0           | Modeling reaction with boundaries lb=0 and up= 1000                                              |

---

### Reactions in FL17

|         |                                            |                                |          |                                                                               |
|---------|--------------------------------------------|--------------------------------|----------|-------------------------------------------------------------------------------|
| ADCL    | 4-aminobenzoate synthase                   | Folate Biosynthesis            | 0        | Reaction added during gap filling                                             |
| PGSA120 | Phosphatidylglycerol synthase (n-C12:0)    | Glycerophospholipid Metabolism | 7.66E-06 | Reaction added during gap filling, reaccion associated with pathogenic traits |
| PGSA160 | Phosphatidylglycerol synthase (n-C16:0)    | Glycerophospholipid Metabolism | 7.66E-06 | Reaction added during gap filling, reaccion associated with pathogenic traits |
| PGSA161 | Phosphatidylglycerol synthase (n-C16:1)    | Glycerophospholipid Metabolism | 7.66E-06 | Reaction added during gap filling, reaccion associated with pathogenic traits |
| PGSA180 | Phosphatidylglycerol synthase (n-C18:0)    | Glycerophospholipid Metabolism | 7.66E-06 | Reaction added during gap filling, reaccion associated with pathogenic traits |
| PGSA181 | Phosphatidylglycerol synthase (n-C18:1)    | Glycerophospholipid Metabolism | 7.66E-06 | Reaction added during gap filling, reaccion associated with pathogenic traits |
| PSD160  | Phosphatidylserine decarboxylase (n-C16:0) | Glycerophospholipid Metabolism | 7.66E-06 | Reaction added during gap filling, reaccion associated with pathogenic traits |
| PSD161  | Phosphatidylserine decarboxylase (n-C16:1) | Glycerophospholipid Metabolism | 1.53E-05 | Reaction added during gap filling, reaccion associated with pathogenic traits |

|           |                                                                  |                                                |              |                                                                                                  |
|-----------|------------------------------------------------------------------|------------------------------------------------|--------------|--------------------------------------------------------------------------------------------------|
| PSSA160   | Phosphatidylserine syntase (n-C16:0)                             | Glycerophospholipid Metabolism                 | 7.66E-06     | Reaction found for L. BT-1 [GEM for BT-1 present work], not reference for Clas                   |
| PSSA161   | Phosphatidylserine syntase (n-C16:1)                             | Glycerophospholipid Metabolism                 | 1.53E-05     | Reaction found for L. BT-1 [GEM for BT-1 present work], not reference for Clas                   |
| TRPS3     | Tryptophan synthase (indoleglycerol phosphate)                   | Phenylalanine Tyrosine Tryptophan Biosynthesis | 0            | Reaction added during gap filling                                                                |
| SHCHD2    | Sirohydrochlorin dehydrogenase (NAD)                             | Porphyrin Metabolism                           | 7.66E-06     | Reaction added during gap filling                                                                |
| UPP3MT    | Uroporphyrinogen methyltransferase                               | Porphyrin Metabolism                           | 7.66E-06     | Reaction added during gap filling                                                                |
| UPP3S     | Uroporphyrinogen-III synthase                                    | Porphyrin Metabolism                           | 1.53E-05     | Reaction found for L. asiaticus [Yan et al. 2013/GEM for L. asiaticus]                           |
| RBFSa     | Riboflavin synthase                                              | Riboflavin Metabolism                          | 0            | "Homologous gene was not found, however the enzyme was predicted [Subhraveti et al, ]            |
| SULR      | Sulfite reductase (NADPH2)                                       | Sulfur Metabolism                              | 0            | Reaction added during gap filling                                                                |
| H2Otex    | H2O transport via diffusion (extracellular to periplasm)         | Transport                                      | -0.482132396 | Modeling reaction added to simulate culture media                                                |
| Htex      | Proton transport via diffusion (extracellular to periplasm)      | Transport                                      | -0.039844523 | Modeling reaction added to simulate culture media                                                |
| ISETACtex | Isethionate transport via diffusion (extracellular to periplasm) | Transport                                      | 0            | Modeling reaction with boundaries lb=0 and up= 1000                                              |
| NO2t2rpp  | Nitrite transport in via proton symport, reversible (periplasm)  | Transport                                      | 0            | Modeling reaction with boundaries lb=0 and up= 1000                                              |
| TOLtpp    | TOLtpp                                                           | Transport                                      | 0            | Modeling reaction with boundaries lb=0 and up= 1000                                              |
| VALtex    | L-valine transport via diffusion (extracellular to periplasm)    | Transport                                      | 0.006154903  | Homologous gene was not found, however the activity was predicted in L. BT1 [Subhraveti et al, ] |

---

**Reactions in gxpsy**

---

|         |                                         |                                 |          |                                                                               |
|---------|-----------------------------------------|---------------------------------|----------|-------------------------------------------------------------------------------|
| P5CR    | Pyrroline-5-carboxylate reductase       | Arginine and Proline Metabolism | 0        | Reaction added during gap filling                                             |
| ADCL    | 4-aminobenzoate synthase                | Folate Biosynthesis             | 0        | Reaction added during gap filling                                             |
| PGSA120 | Phosphatidylglycerol synthase (n-C12:0) | Glycerophospholipid Metabolism  | 7.65E-06 | Reaction added during gap filling, reaccion associated with pathogenic traits |
| PGSA160 | Phosphatidylglycerol synthase (n-C16:0) | Glycerophospholipid Metabolism  | 7.65E-06 | Reaction added during gap filling, reaccion associated with pathogenic traits |

|           |                                                                  |                                   |              |                                                                                       |
|-----------|------------------------------------------------------------------|-----------------------------------|--------------|---------------------------------------------------------------------------------------|
| PGSA161   | Phosphatidylglycerol synthase (n-C16:1)                          | Glycerophospholipid Metabolism    | 7.65E-06     | Reaction added during gap filling, reaccion associated with pathogenic traits         |
| PGSA180   | Phosphatidylglycerol synthase (n-C18:0)                          | Glycerophospholipid Metabolism    | 7.65E-06     | Reaction added during gap filling, reaccion associated with pathogenic traits         |
| PGSA181   | Phosphatidylglycerol synthase (n-C18:1)                          | Glycerophospholipid Metabolism    | 7.65E-06     | Reaction added during gap filling, reaccion associated with pathogenic traits         |
| PSD160    | Phosphatidylserine decarboxylase (n-C16:0)                       | Glycerophospholipid Metabolism    | 7.65E-06     | Reaction added during gap filling, reaccion associated with pathogenic traits         |
| PSD161    | Phosphatidylserine decarboxylase (n-C16:1)                       | Glycerophospholipid Metabolism    | 1.53E-05     | Reaction added during gap filling, reaccion associated with pathogenic traits         |
| PSSA160   | Phosphatidylserine syntase (n-C16:0)                             | Glycerophospholipid Metabolism    | 7.65E-06     | Reaction found for L. BT-1 [GEM for BT-1 present work], not reference for Clas        |
| PSSA161   | Phosphatidylserine syntase (n-C16:1)                             | Glycerophospholipid Metabolism    | 1.53E-05     | Reaction found for L. BT-1 [GEM for BT-1 present work], not reference for Clas        |
| SHCHD2    | Sirohydrochlorin dehydrogenase (NAD)                             | Porphyrin Metabolism              | 7.65E-06     | Reaction added during gap filling                                                     |
| UPP3MT    | Uroporphyrinogen methyltransferase                               | Porphyrin Metabolism              | 7.65E-06     | Reaction added during gap filling                                                     |
| UPP3S     | Uroporphyrinogen-III synthase                                    | Porphyrin Metabolism              | 1.53E-05     | Reaction found for L. asiaticus [Yan et al. 2013/GEM for L. asiaticus]                |
| RBFSa     | Riboflavin synthase                                              | Riboflavin Metabolism             | 0            | "Homologous gene was not found, however the enzyme was predicted [Subhraveti et al, ] |
| IPDDI     | Isopentenyl-diphosphate D-isomerase                              | Steroid biosynthesis              | 7.65E-06     | Reaction added during gap filling                                                     |
| H2Otex    | H2O transport via diffusion (extracellular to periplasm)         | Transport                         | -0.473461935 | Modeling reaction added to simulate culture media                                     |
| Htex      | Proton transport via diffusion (extracellular to periplasm)      | Transport                         | -0.035536121 | Modeling reaction added to simulate culture media                                     |
| ISETACTex | Isethionate transport via diffusion (extracellular to periplasm) | Transport                         | 0            | Modeling reaction with boundaries lb=0 and up= 1000                                   |
| TOLtpp    | TOLtpp                                                           | Transport                         | 0            | Modeling reaction with boundaries lb=0 and up= 1000                                   |
| UREA      | Urease                                                           | Urea cycle/amino group metabolism | 0.00746609   | Reaction added during gap filling                                                     |

---

### Reactions in Ishi-1

---

|       |                          |                                 |             |                                   |
|-------|--------------------------|---------------------------------|-------------|-----------------------------------|
| ORNCD | Ornithine cyclodeaminase | Arginine and Proline Metabolism | 0.003209552 | Reaction added during gap filling |
|-------|--------------------------|---------------------------------|-------------|-----------------------------------|

|          |                                                                        |                                          |              |                                                                               |
|----------|------------------------------------------------------------------------|------------------------------------------|--------------|-------------------------------------------------------------------------------|
| HPPK     | 2-amino-4-hydroxy-6-hydroxymethylidihydropteridine diphosphokinase     | Folate Biosynthesis                      | 0.000764179  | Reaction found for L. BT-1 [Lai et al., 2016/GEM for BT-1]                    |
| GTHPi    | Glutathione peridoxase                                                 | Glutathione Metabolism                   | -0.001143212 | Reaction added during gap filling                                             |
| AGPAT120 | 1-tetradecanoyl-sn-glycerol 3-phosphate O-acyltransferase (n-C12:0)    | Glycerophospholipid Metabolism           | 1.53E-05     | Reaction added during gap filling, reaccion associated with pathogenic traits |
| AGPAT180 | 1-octadecanoyl-sn-glycerol 3-phosphate O-acyltransferase (n-C18:0)     | Glycerophospholipid Metabolism           | 1.53E-05     | Reaction added during gap filling, reaccion associated with pathogenic traits |
| AGPAT181 | 1-octadec-7-enoyl-sn-glycerol 3-phosphate O-acyltransferase (n-C18:1)  | Glycerophospholipid Metabolism           | 2.29E-05     | Reaction added during gap filling, reaccion associated with pathogenic traits |
| DASYN120 | CDP-diacylglycerol synthetase (n-C12:0)                                | Glycerophospholipid Metabolism           | 1.53E-05     | Reaction added during gap filling, reaccion associated with pathogenic traits |
| DASYN180 | CDP-diacylglycerol synthetase (n-C18:0)                                | Glycerophospholipid Metabolism           | 1.53E-05     | Reaction added during gap filling, reaccion associated with pathogenic traits |
| DASYN181 | CDP-diacylglycerol synthetase (n-C18:1)                                | Glycerophospholipid Metabolism           | 2.29E-05     | Reaction added during gap filling, reaccion associated with pathogenic traits |
| G3PAT120 | Glycerol-3-phosphate acyltransferase (C12:0)                           | Glycerophospholipid Metabolism           | 1.53E-05     | Reaction added during gap filling, reaccion associated with pathogenic traits |
| G3PAT160 | Glycerol-3-phosphate acyltransferase (C16:0)                           | Glycerophospholipid Metabolism           | 1.53E-05     | Reaction added during gap filling, reaccion associated with pathogenic traits |
| G3PAT161 | Glycerol-3-phosphate acyltransferase (C16:1)                           | Glycerophospholipid Metabolism           | 2.29E-05     | Reaction added during gap filling, reaccion associated with pathogenic traits |
| G3PAT180 | Glycerol-3-phosphate acyltransferase (C18:0)                           | Glycerophospholipid Metabolism           | 1.53E-05     | Reaction added during gap filling, reaccion associated with pathogenic traits |
| G3PAT181 | Glycerol-3-phosphate acyltransferase (C18:1)                           | Glycerophospholipid Metabolism           | 2.29E-05     | Reaction added during gap filling, reaccion associated with pathogenic traits |
| GLYCK    | Glycerate kinase                                                       | Glycine, Serine and threonine metabolism | 0.052919297  | Reaction added during gap filling                                             |
| GLXCL    | Glyoxalate carboligase                                                 | Glycolate metabolism                     | 0.052919297  | Reaction added during gap filling                                             |
| TRSARr   | Tartronate semialdehyde reductase                                      | Glycolate metabolism                     | 0.052919297  | Reaction added during gap filling                                             |
| PGMT     | Phosphoglucomutase                                                     | Glycolysis                               | -4.59E-05    | Reaction found for L. asiaticus [Yan et al. 2013/GEM for L. asiaticus]        |
| DNAMTn2r | DNA (cytosine-5-)-methyltransferase                                    | Methionine Metabolism                    | -7.64E-05    | Reaction added during gap filling                                             |
| MHPGLUT  | 5 methyltetrahydropteroyltriglutamate homocysteine S methyltransferase | Methionine Metabolism                    | 0            | Reaction added during gap filling                                             |

|               |                                                                    |                                                |             |                                                     |
|---------------|--------------------------------------------------------------------|------------------------------------------------|-------------|-----------------------------------------------------|
| DHPM1         | Dihydropyrimidinase (5,6-dihydrouracil)                            | Pantothenate and CoA Biosynthesis              | 0           | Reaction added during gap filling                   |
| DURAD         | Dihydrouracil dehydrogenase (NADP)                                 | Pantothenate and CoA Biosynthesis              | 0           | Reaction added during gap filling                   |
| PANTS         | Pantothenate synthase                                              | Pantothenate and CoA Biosynthesis              | 0           | Reaction added during gap filling                   |
| UPPN          | B-ureidopropionase                                                 | Pantothenate and CoA Biosynthesis              | 0           | Reaction added during gap filling                   |
| TRPS3         | Tryptophan synthase (indoleglycerol phosphate)                     | Phenylalanine Tyrosine Tryptophan Biosynthesis | 0           | Reaction added during gap filling                   |
| G1SAT         | Glutamate-1-semialdehyde aminotransferase                          | Porphyrin Metabolism                           | 0.000122269 | Reaction added during gap filling                   |
| PPPGO         | Protoporphyrinogen oxidase (aerobic)                               | Porphyrin Metabolism                           | 7.64E-06    | Reaction added during gap filling                   |
| GART          | GAR transformylase-T                                               | Purine Metabolism                              | 0.000764179 | Reaction added during gap filling                   |
| DUTPDP        | DUTP diphosphatase                                                 | Pyrimidine Metabolism                          | 0           | Reaction added during gap filling                   |
| PMDPHT        | Pyrimidine phosphatase                                             | Riboflavin Metabolism                          | 0           | Reaction added during gap filling                   |
| SULR          | Sulfite reductase (NADPH2)                                         | Sulfur Metabolism                              | 0           | Reaction added during gap filling                   |
| HMGL          | Hydroxymethylglutaryl-CoA lyase                                    | Synthesis and degradation of Ketones Bodies    | 0           | Reaction added during gap filling                   |
| ICDHyr        | Isocitrate dehydrogenase (NADP)                                    | TCA Cycle                                      | 0.244161406 | Reaction added during gap filling                   |
| ICL           | Isocitrate lyase                                                   | TCA Cycle                                      | 0.105838594 | Reaction added during gap filling                   |
| 2DHGLCNkt_tpp | 2DHGLCNkt tpp                                                      | Transport                                      | 0           | Modeling reaction with boundaries lb=0 and up= 1000 |
| CHOLS_ex      | CHOLS LPAREN ex RPAREN                                             | Transport                                      | 0           | Modeling reaction with boundaries lb=0 and up= 1000 |
| CITtex        | Citrate transport via diffusion (extracellular to periplasm)       | Transport                                      | 0.35        | Modeling reaction with boundaries lb=0 and up= 1000 |
| COBALT2tex    | Cobalt (Co+2) transport via diffusion (extracellular to periplasm) | Transport                                      | 0           | Modeling reaction with boundaries lb=0 and up= 1000 |
| FERtex        | FERtex                                                             | Transport                                      | 0           | Modeling reaction with boundaries lb=0 and up= 1000 |
| FERtpp        | FERtpp                                                             | Transport                                      | 0           | Modeling reaction with boundaries lb=0 and up= 1000 |
| GLCNt2rpp     | D-gluconate transport via proton symport, reversible (periplasm)   | Transport                                      | 0           | Modeling reaction with boundaries lb=0 and up= 1000 |

|           |                                                                     |                                            |             |                                                                                                  |
|-----------|---------------------------------------------------------------------|--------------------------------------------|-------------|--------------------------------------------------------------------------------------------------|
| GLUt4pp   | Na <sup>+</sup> /glutamate symport (periplasm)                      | Transport                                  | 0           | Modeling reaction with boundaries lb=0 and up= 1000                                              |
| GLYALDtex | Glyceraldehyde transport via diffusion (extracellular to periplasm) | Transport                                  | 0           | Modeling reaction with boundaries lb=0 and up= 1000                                              |
| HCO3_NAt  | Bicarbonate transport (Na/HCO <sub>3</sub> cotransport)             | Transport                                  | 0           | Modeling reaction with boundaries lb=0 and up= 1000                                              |
| HXAtex    | Hexanoate transport via diffusion (extracellular to periplasm)      | Transport                                  | 0           | Modeling reaction with boundaries lb=0 and up= 1000                                              |
| ICITtex   | Citrate transport via diffusion extracellular to periplasm          | Transport                                  | 0           | Modeling reaction with boundaries lb=0 and up= 1000                                              |
| ISETACTex | Isethionate transport via diffusion (extracellular to periplasm)    | Transport                                  | 0           | Modeling reaction with boundaries lb=0 and up= 1000                                              |
| RIBabcpp  | D-ribose transport via ABC system (periplasm)                       | Transport                                  | 0           | Modeling reaction with boundaries lb=0 and up= 1000                                              |
| TOLtpp    | TOLtpp                                                              | Transport                                  | 0           | Modeling reaction with boundaries lb=0 and up= 1000                                              |
| VALtex    | L-valine transport via diffusion (extracellular to periplasm)       | Transport                                  | 0.006144    | Homologous gene was not found, however the activity was predicted in L. BT1 [Subhraveti et al, ] |
| VANKpp    | VANKpp                                                              | Transport                                  | 0           | Modeling reaction with boundaries lb=0 and up= 1000                                              |
| VANLNtex  | VANLNtex                                                            | Transport                                  | 0           | Modeling reaction with boundaries lb=0 and up= 1000                                              |
| VANLTtex  | VANLTtex                                                            | Transport                                  | 0           | Modeling reaction with boundaries lb=0 and up= 1000                                              |
| VNLNpp    | VNLNpp                                                              | Transport                                  | 0           | Modeling reaction with boundaries lb=0 and up= 1000                                              |
| UREA      | Urease                                                              | Urea cycle/amino group metabolism          | 0.007458388 | Reaction added during gap filling                                                                |
| KARA1     | Ketol-acid reductoisomerase (2,3-dihydroxy-3-methylbutanoate)       | Valine, Leucine, and Isoleucine Metabolism | 0           | Reaction added during gap filling                                                                |
| KARA2     | Ketol-acid reductoisomerase (2-Acetolactate)                        | Valine, Leucine, and Isoleucine Metabolism | 0           | Reaction added during gap filling                                                                |

---

**Reactions in psy62**

---

|         |                                                          |                                                |              |                                                                                       |
|---------|----------------------------------------------------------|------------------------------------------------|--------------|---------------------------------------------------------------------------------------|
| ADCL    | 4-aminobenzoate synthase                                 | Folate Biosynthesis                            | 0            | Reaction added during gap filling                                                     |
| PGSA120 | Phosphatidylglycerol synthase (n-C12:0)                  | Glycerophospholipid Metabolism                 | 7.66E-06     | Reaction added during gap filling, reaccion associated with pathogenic traits         |
| PGSA160 | Phosphatidylglycerol synthase (n-C16:0)                  | Glycerophospholipid Metabolism                 | 7.66E-06     | Reaction added during gap filling, reaccion associated with pathogenic traits         |
| PGSA161 | Phosphatidylglycerol synthase (n-C16:1)                  | Glycerophospholipid Metabolism                 | 7.66E-06     | Reaction added during gap filling, reaccion associated with pathogenic traits         |
| PGSA180 | Phosphatidylglycerol synthase (n-C18:0)                  | Glycerophospholipid Metabolism                 | 7.66E-06     | Reaction added during gap filling, reaccion associated with pathogenic traits         |
| PGSA181 | Phosphatidylglycerol synthase (n-C18:1)                  | Glycerophospholipid Metabolism                 | 7.66E-06     | Reaction added during gap filling, reaccion associated with pathogenic traits         |
| PSD160  | Phosphatidylserine decarboxylase (n-C16:0)               | Glycerophospholipid Metabolism                 | 7.66E-06     | Reaction added during gap filling, reaccion associated with pathogenic traits         |
| PSD161  | Phosphatidylserine decarboxylase (n-C16:1)               | Glycerophospholipid Metabolism                 | 1.53E-05     | Reaction added during gap filling, reaccion associated with pathogenic traits         |
| PSSA160 | Phosphatidylserine syntase (n-C16:0)                     | Glycerophospholipid Metabolism                 | 7.66E-06     | Reaction found for L. BT-1 [GEM for BT-1 present work], not reference for Clas        |
| PSSA161 | Phosphatidylserine syntase (n-C16:1)                     | Glycerophospholipid Metabolism                 | 1.53E-05     | Reaction found for L. BT-1 [GEM for BT-1 present work], not reference for Clas        |
| TRPS3   | Tryptophan synthase (indoleglycerol phosphate)           | Phenylalanine Tyrosine Tryptophan Biosynthesis | 0            | Reaction added during gap filling                                                     |
| SHCHD2  | Sirohydrochlorin dehydrogenase (NAD)                     | Porphyrin Metabolism                           | 7.66E-06     | Reaction added during gap filling                                                     |
| UPP3MT  | Uroporphyrinogen methyltransferase                       | Porphyrin Metabolism                           | 7.66E-06     | Reaction added during gap filling                                                     |
| UPP3S   | Uroporphyrinogen-III synthase                            | Porphyrin Metabolism                           | 1.53E-05     | Reaction found for L. asiaticus [Yan et al. 2013/GEM for L. asiaticus]                |
| RBFSa   | Riboflavin synthase                                      | Riboflavin Metabolism                          | 0            | "Homologous gene was not found, however the enzyme was predicted [Subhraveti et al, ] |
| SULR    | Sulfite reductase (NADPH2)                               | Sulfur Metabolism                              | 0            | Reaction added during gap filling                                                     |
| FERtex  | FERtex                                                   | Transport                                      | 0            | Modeling reaction with boundaries lb=0 and up= 1000                                   |
| FERtpp  | FERtpp                                                   | Transport                                      | 0            | Modeling reaction with boundaries lb=0 and up= 1000                                   |
| H2Otex  | H2O transport via diffusion (extracellular to periplasm) | Transport                                      | -0.482132396 | Modeling reaction added to simulate culture media                                     |



|           |                                                                  |           |              |                                                                                                  |
|-----------|------------------------------------------------------------------|-----------|--------------|--------------------------------------------------------------------------------------------------|
| Htex      | Proton transport via diffusion (extracellular to periplasm)      | Transport | -0.039844523 | Modeling reaction added to simulate culture media                                                |
| ISETACTex | Isethionate transport via diffusion (extracellular to periplasm) | Transport | 0            | Modeling reaction with boundaries lb=0 and up= 1000                                              |
| RIBabcpp  | D-ribose transport via ABC system (periplasm)                    | Transport | 0            | Modeling reaction with boundaries lb=0 and up= 1000                                              |
| TOLtpp    | TOLtpp                                                           | Transport | 0            | Modeling reaction with boundaries lb=0 and up= 1000                                              |
| VALtex    | L-valine transport via diffusion (extracellular to periplasm)    | Transport | 0.006154903  | Homologous gene was not found, however the activity was predicted in L. BT1 [Subhraveti et al, ] |

**Reactions in YCPSy**

|         |                                                |                                                |          |                                                                                |
|---------|------------------------------------------------|------------------------------------------------|----------|--------------------------------------------------------------------------------|
| ADCL    | 4-aminobenzoate synthase                       | Folate Biosynthesis                            | 0        | Reaction added during gap filling                                              |
| PGSA120 | Phosphatidylglycerol synthase (n-C12:0)        | Glycerophospholipid Metabolism                 | 7.66E-06 | Reaction added during gap filling, reaccion associated with pathogenic traits  |
| PGSA160 | Phosphatidylglycerol synthase (n-C16:0)        | Glycerophospholipid Metabolism                 | 7.66E-06 | Reaction added during gap filling, reaccion associated with pathogenic traits  |
| PGSA161 | Phosphatidylglycerol synthase (n-C16:1)        | Glycerophospholipid Metabolism                 | 7.66E-06 | Reaction added during gap filling, reaccion associated with pathogenic traits  |
| PGSA180 | Phosphatidylglycerol synthase (n-C18:0)        | Glycerophospholipid Metabolism                 | 7.66E-06 | Reaction added during gap filling, reaccion associated with pathogenic traits  |
| PGSA181 | Phosphatidylglycerol synthase (n-C18:1)        | Glycerophospholipid Metabolism                 | 7.66E-06 | Reaction added during gap filling, reaccion associated with pathogenic traits  |
| PSD160  | Phosphatidylserine decarboxylase (n-C16:0)     | Glycerophospholipid Metabolism                 | 7.66E-06 | Reaction added during gap filling, reaccion associated with pathogenic traits  |
| PSD161  | Phosphatidylserine decarboxylase (n-C16:1)     | Glycerophospholipid Metabolism                 | 1.53E-05 | Reaction added during gap filling, reaccion associated with pathogenic traits  |
| PSSA160 | Phosphatidylserine syntase (n-C16:0)           | Glycerophospholipid Metabolism                 | 7.66E-06 | Reaction found for L. BT-1 [GEM for BT-1 present work], not reference for Clas |
| PSSA161 | Phosphatidylserine syntase (n-C16:1)           | Glycerophospholipid Metabolism                 | 1.53E-05 | Reaction found for L. BT-1 [GEM for BT-1 present work], not reference for Clas |
| TRPS3   | Tryptophan synthase (indoleglycerol phosphate) | Phenylalanine Tyrosine Tryptophan Biosynthesis | 0        | Reaction added during gap filling                                              |
| SHCHD2  | Sirohydrochlorin dehydrogenase (NAD)           | Porphyrin Metabolism                           | 7.66E-06 | Reaction added during gap filling                                              |

|           |                                                                  |                       |              |                                                                                                                                                                                |
|-----------|------------------------------------------------------------------|-----------------------|--------------|--------------------------------------------------------------------------------------------------------------------------------------------------------------------------------|
| UPP3MT    | Uroporphyrinogen methyltransferase                               | Porphyrin Metabolism  | 7.66E-06     | Reaction added during gap filling                                                                                                                                              |
| UPP3S     | Uroporphyrinogen-III synthase                                    | Porphyrin Metabolism  | 1.53E-05     | Reaction found for <i>L. asiaticus</i> [Yan et al. 2013/GEM for <i>L. asiaticus</i> ]<br>"Homologous gene was not found, however the enzyme was predicted [Subhraveti et al, ] |
| RBFSa     | Riboflavin synthase                                              | Riboflavin Metabolism | 0            | Reaction added during gap filling                                                                                                                                              |
| SULR      | Sulfite reductase (NADPH2)                                       | Sulfur Metabolism     | 0            | Modeling reaction added to simulate culture media                                                                                                                              |
| H2Otex    | H2O transport via diffusion (extracellular to periplasm)         | Transport             | -0.482132396 | Modeling reaction added to simulate culture media                                                                                                                              |
| Htex      | Proton transport via diffusion (extracellular to periplasm)      | Transport             | -0.039844523 | Modeling reaction with boundaries lb=0 and up= 1000                                                                                                                            |
| ISETACtex | Isethionate transport via diffusion (extracellular to periplasm) | Transport             | 0            | Modeling reaction with boundaries lb=0 and up= 1000                                                                                                                            |
| TOLtpp    | TOLtpp                                                           | Transport             | 0            | Homologous gene was not found, however the activity was predicted in <i>L. BT1</i>                                                                                             |
| VALtex    | L-valine transport via diffusion (extracellular to periplasm)    | Transport             | 0.006154903  | [Subhraveti et al, ]                                                                                                                                                           |

---

#### Reactions in BT-1

---

|          |                                                  |                                |              |                                                                               |
|----------|--------------------------------------------------|--------------------------------|--------------|-------------------------------------------------------------------------------|
| ADCL     | 4-aminobenzoate synthase                         | Folate Biosynthesis            | 0            | Reaction added during gap filling                                             |
| GLYALDtp | Glyceraldehyde facilitated diffusion (periplasm) | Glycerophospholipid Metabolism | -0.018285759 | Reaction added during gap filling, reaccion associated with pathogenic traits |
| PGSA120  | Phosphatidylglycerol synthase (n-C12:0)          | Glycerophospholipid Metabolism | 7.77E-06     | Reaction added during gap filling, reaccion associated with pathogenic traits |
| PGSA160  | Phosphatidylglycerol synthase (n-C16:0)          | Glycerophospholipid Metabolism | 7.77E-06     | Reaction added during gap filling, reaccion associated with pathogenic traits |
| PGSA161  | Phosphatidylglycerol synthase (n-C16:1)          | Glycerophospholipid Metabolism | 7.77E-06     | Reaction added during gap filling, reaccion associated with pathogenic traits |
| PGSA180  | Phosphatidylglycerol synthase (n-C18:0)          | Glycerophospholipid Metabolism | 7.77E-06     | Reaction added during gap filling, reaccion associated with pathogenic traits |
| PGSA181  | Phosphatidylglycerol synthase (n-C18:1)          | Glycerophospholipid Metabolism | 7.77E-06     | Reaction added during gap filling, reaccion associated with pathogenic traits |
| PSD160   | Phosphatidylserine decarboxylase (n-C16:0)       | Glycerophospholipid Metabolism | 7.77E-06     | Reaction added during gap filling, reaccion associated with pathogenic traits |
| PSD161   | Phosphatidylserine decarboxylase (n-C16:1)       | Glycerophospholipid Metabolism | 1.55E-05     | Reaction added during gap filling, reaccion associated with pathogenic traits |

|            |                                                                  |                                      |              |                                                                                                  |
|------------|------------------------------------------------------------------|--------------------------------------|--------------|--------------------------------------------------------------------------------------------------|
| PSSA160    | Phosphatidylserine syntase (n-C16:0)                             | Glycerophospholipid Metabolism       | 7.77E-06     | Reaction found for L. BT-1 [GEM for BT-1 present work], not reference for Clas                   |
| PSSA161    | Phosphatidylserine syntase (n-C16:1)                             | Glycerophospholipid Metabolism       | 1.55E-05     | Reaction found for L. BT-1 [GEM for BT-1 present work], not reference for Clas                   |
| TRSARr     | Tartronate semialdehyde reductase                                | Glycolate metabolism                 | 2.26E-02     | Reaction added during gap filling                                                                |
| GADktp     | GADktp                                                           | Glycolysis                           | 0.00E+00     | Reaction added during gap filling                                                                |
| PGMT       | Phosphoglucomutase                                               | Glycolysis                           | -4.66E-05    | Manually curated grRule/Reaction found for L. asiaticus [Yan et al. 2013/GEM for L. asiaticus]   |
| HSERTA     | Homoserine O trans acetylase                                     | Methionine Metabolism                | -5.07E-03    | Reaction added during gap filling                                                                |
| TKT1       | Transketolase                                                    | Pathway                              | -4.12E-03    | Reaction added during gap filling                                                                |
| TKT2       | Transketolase                                                    | Pentose Phosphate Pathway            | -4.12E-03    | Reaction found for L. asiaticus [Yan et al. 2013/GEM for L. asiaticus]                           |
| SHCHD2     | Sirohydrochlorin dehydrogenase (NAD)                             | Porphyrin and Chlorophyll Metabolism | 7.77E-06     | Reaction added during gap filling                                                                |
| UPP3MT     | Uroporphyrinogen methyltransferase                               | Porphyrin and Chlorophyll Metabolism | 7.77E-06     | Reaction added during gap filling                                                                |
| UPP3S      | Uroporphyrinogen-III synthase                                    | Porphyrin and Chlorophyll Metabolism | 1.55E-05     | Reaction found for L. asiaticus [Yan et al. 2013/GEM for L. asiaticus]                           |
| IPDPS      | 1-hydroxy-2-methyl-2-(E)-butenyl 4-diphosphate reductase (ipdp)  | Steroid biosynthesis                 | 2.33E-05     | Reaction added during gap filling, reaccion associated with pathogenic traits                    |
| COBALT2tpp | Cobalt transport in via permease (no H+)                         | Transport                            | 0            | Modeling reaction with boundaries lb=0 and up= 1000                                              |
| H2Otex     | H2O transport via diffusion (extracellular to periplasm)         | Transport                            | -0.415341788 | Modeling reaction added to simulate culture media                                                |
| Htex       | Proton transport via diffusion (extracellular to periplasm)      | Transport                            | 0.032495886  | Modeling reaction with boundaries lb=0 and up= 1000                                              |
| ISETACTex  | Isethionate transport via diffusion (extracellular to periplasm) | Transport                            | 0.00E+00     | Modeling reaction with boundaries lb=0 and up= 1000                                              |
| TOLtpp     | TOLtpp                                                           | Transport                            | 0.00E+00     | Modeling reaction with boundaries lb=0 and up= 1000                                              |
| VALtex     | L-valine transport via diffusion (extracellular to periplasm)    | Transport                            | 0.00624689   | Homologous gene was not found, however the activity was predicted in L. BT1 [Subhraveti et al, ] |

**Breakdown of reactions by general subsystem**

Transport  
Metabolic

Modeling reactions  
Reference/gap filling (30:70)

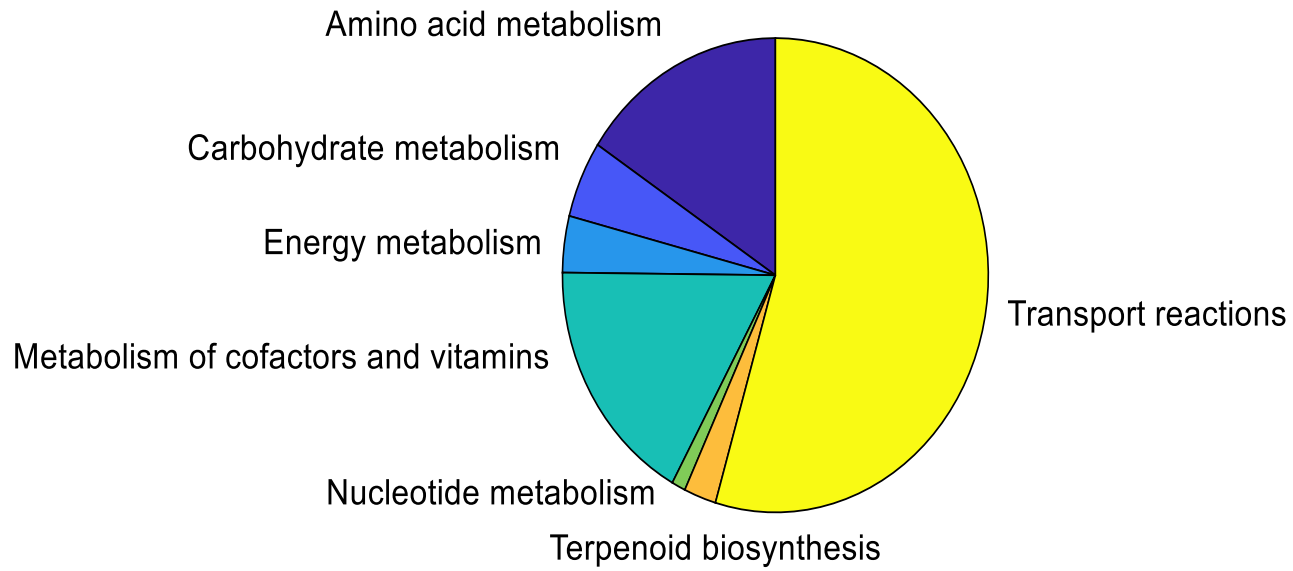

Supplement: 41540_2020_142_MOESM1_ESM.pdf [file 41540_2020_142_MOESM1_ESM.pdf]
